# Supplementary material for: Network Pharmacology and Molecular Docking Analysis of Active Compounds in Tualang Honey against Atherosclerosis
Source: MDPI journal article supplement (doi:10.3390/foods12091779), 2023-04-25
Supplement: s1 [file s1]

# **Network Pharmacology and Molecular Docking Analysis of Active Compounds in Tualang Honey against Atherosclerosis**

**Ain Nabila Syahira Shamsol Azman <sup>1</sup>, Jun Jie Tan <sup>2</sup>, Muhammad Nazrul Hakim Abdullah <sup>3</sup>,  
Hasnah Bahari <sup>1</sup> Vuanghao Lim <sup>2,\*</sup> and Yoke Keong Yong <sup>1,\*</sup>**

1 Department of Human Anatomy, Faculty of Medicine and Health Sciences,  
Universiti Putra Malaysia, Serdang 43400, Selangor, Malaysia

2 Advanced Medical and Dental Institute, Universiti Sains Malaysia, Bertam, Kepala  
Batas 13200, Penang, Malaysia

3 Department of Biomedical Science, Faculty of Medicine and Health Sciences,  
Universiti Putra Malaysia, Serdang 43400, Selangor, Malaysia

\* Correspondence: yoke\_keong@upm.edu.my (V.L.); vlim@usm.my (Y.K.Y.)

**Supplementary Table S1: Bioactive compound of Tualang Honey**

**Supplementary Table S2: Target genes of Tualang Honey Bioactive Compound**

**Supplementary Table S3: Target genes of Atherosclerosis**

**Supplementary Table S4: The degree value of nodes in protein–protein interaction network.**

**Supplementary Table S1: Bioactive compound of Tualang Honey**

| No | Compound                                         | References    |
|----|--------------------------------------------------|---------------|
| 1  | (5-methylfuran-2-yl) methanol                    | [44]          |
| 2  | 1,6-Anhydro-beta-D-glucofuranose                 | [39]          |
| 3  | 1-dodecane                                       | [42]          |
| 4  | 1-hexadecane                                     | [42]          |
| 5  | 2 furancarboxaldehyde                            | [39,41,42]    |
| 6  | 2(3H)-Furanone                                   | [39,41,42]    |
| 7  | 2(5H)-Furanone                                   | [39,41,42,44] |
| 8  | 2, 3-dihydro-3, 5-hydroxy-6-methyl-4H-pyran-4one | [39,42,44]    |
| 9  | 2,4-dihydroxy-2,5-dimethyl-3[2H]-furan-3 one     | [41,42,44]    |
| 10 | 2-acetylfuran                                    | [44]          |
| 11 | 2-amino-1,3-dihydroxyactadecane                  | [40]          |
| 12 | 2-cyclopentene-1,4,-dione                        | [41,42]       |
| 13 | 2-Furanmethanol                                  | [39]          |
| 14 | 2-furoic acid                                    | [44]          |
| 15 | 2-furylmethylketone                              | [41]          |
| 16 | 2-hydroxy-1-[hydroxymethyl] ethyl ester          | [41]          |
| 17 | 2-hydroxy-2-cyclopenten-1-one                    | [41,42,44]    |
| 18 | 2-hydroxycinnamic acid                           | [43]          |
| 19 | 2-Propanone, 1,3-dihydroxy                       | [39]          |
| 20 | 2-Propanone, 1-hydroxy- (CAS) acetol             | [39]          |
| 21 | 3,5-Dihydroxy-2-methyl-4H-pyran-4-one            | [44]          |
| 22 | 3,7,4-trihydroxyflavone                          | [40]          |
| 23 | 3-Furaldehyde                                    | [39]          |
| 24 | 3-furoic acid methyl ester                       | [44]          |
| 25 | 3-Hydroxy-2-methyl-4H-pyran-4-one                | [44]          |
| 26 | 4-oxo-5-methoxy-2-penten-5-olide                 | [44]          |
| 27 | 5-(Hydroxymethyl) 2-furancarboxaldehyde          | [39]          |
| 28 | 5-(hydroxymethyl)-furfural(HMF)                  | [41,42,44]    |
| 29 | 5,5'-oxy-dimethylene-bis[2-furaldehyde]          | [44]          |
| 30 | 5-acetoxymethyl-2-furaldehyde                    | [44]          |
| 31 | 6-hydroxy-4-methylcoumarin                       | [40]          |
| 32 | 9-octadecane                                     | [42]          |
| 33 | Absciscic acid                                   | [40]          |
| 34 | Acetic acid                                      | [41,42]       |
| 35 | Apigenin                                         | [13,40,43]    |
| 36 | Benzoic acid                                     | [13,41]       |
| 37 | Caffeic acid                                     | [13,40,41,43] |
| 38 | Catechin                                         | [13,41,43]    |
| 39 | Chrysin                                          | [40,43]       |
| 40 | Cycloeicosane                                    | [42]          |
| 41 | Cyclotetradecane                                 | [42]          |
| 42 | Diocetyl phthalate                               | [42]          |

|    |                       |               |
|----|-----------------------|---------------|
| 43 | Docosane              | [42]          |
| 44 | Dodecane              | [42]          |
| 45 | Dotriacontane         | [42]          |
| 46 | Eicosane              | [42]          |
| 47 | Ethyl oleate          | [41]          |
| 48 | ethyl palmitate       | [44]          |
| 49 | Fisetin               | [40]          |
| 50 | Formic acid           | [39]          |
| 51 | Furfural              | [41]          |
| 52 | Gallic acid           | [13,41,43]    |
| 53 | Gamma-crotonolactone  | [41]          |
| 54 | Gluconic acid         | [40]          |
| 55 | Glucose               | [40]          |
| 56 | Heneicosane           | [42]          |
| 57 | Heptacosane           | [42]          |
| 58 | Hesperetin            | [13,40]       |
| 59 | Hexacosane            | [42]          |
| 60 | Hyacinthin            | [41,42,44]    |
| 61 | Hydrogen chloride     | [39]          |
| 62 | Hydroxybenzoic acid   | [40]          |
| 63 | Hydroxyoctanic acid   | [40]          |
| 64 | Isoorientin           | [40]          |
| 65 | Kaempferol            | [13,40,41,43] |
| 66 | Ketoisophorone        | [44]          |
| 67 | Lauryl diethanolamide | [40]          |
| 68 | Levoglucosenone       | [39]          |
| 69 | Linalool oxide        | [42]          |
| 70 | Linoleic acid         | [44,40,40]    |
| 71 | Luteolin              | [13,41,40]    |
| 72 | Maltol                | [39]          |
| 73 | Methyl 2-furoate      | [39]          |
| 74 | Naringenin            | [13,40,41]    |
| 75 | Naringin              | [13]          |
| 76 | Nonacosane            | [42]          |
| 77 | n-tetratetracontane   | [42]          |
| 78 | Octacosane            | [42]          |
| 79 | Octadecanoic acid     | [41,44]       |
| 80 | Oleic acid            | [41,44]       |
| 81 | Orotic acid           | [40]          |
| 82 | Palmitic acid         | [41,42,44]    |
| 83 | p-coumaric acid       | [13,41,43]    |
| 84 | Pentacosane           | [42]          |
| 85 | Phenylacetaldehyde    | [39,41]       |
| 86 | Propanoic acid        | [39]          |
| 87 | Protoanemonine        | [44]          |

|     |                          |            |
|-----|--------------------------|------------|
| 88  | Pyridoxal                | [40]       |
| 89  | Pyr-idoxamine            | [40]       |
| 90  | Pyrocatechol             | [44]       |
| 91  | Quercetin-3-0-rutinoside | [43]       |
| 92  | Salicylic acid           | [40]       |
| 93  | Stearic acid             | [42,44]    |
| 94  | Succinic acid            | [40]       |
| 95  | Syringic acid            | [13,41,43] |
| 96  | Tetracosane              | [42]       |
| 97  | Trans-cinnamic acid      | [13,41,43] |
| 98  | Triacontane              | [42]       |
| 99  | Tricosane                | [42]       |
| 100 | Tritetracontane          | [42]       |
| 101 | Vanillic acid            | [13]       |
| 102 | Vitexin                  | [40]       |
| 103 | Xanthohumol              | [40]       |

**Supplementary Table S2: Target genes of Tualang Honey Bioactive Compound**

| No  | Target                                                   | Common name | Compound                                                | Database 1   | Database 2 |
|-----|----------------------------------------------------------|-------------|---------------------------------------------------------|--------------|------------|
| 1.  | P-glycoprotein 1                                         | ABCB1       | fisetin, hesperetin, kaempferol, luteolin               | Swiss Target |            |
| 2.  | Multidrug resistance-associated protein 1                | ABCC1       | ethyl oleate, fisetin, hesperetin, kaempferol, luteolin | Swiss Target | SuperPred  |
| 3.  | ATP-binding cassette sub-family G member 2               | ABCG2       | fisetin, hesperetin, kaempferol, luteolin               | Swiss Target |            |
| 4.  | Acetyl-CoA carboxylase 1                                 | ACACA       | ethyl oleate                                            | Swiss Target |            |
| 5.  | Acetyl-CoA carboxylase 2                                 | ACACB       | ethyl oleate                                            | Swiss Target |            |
| 6.  | Acetylcholinesterase                                     | ACHE        | fisetin, hesperetin, kaempferol, luteolin               | Swiss Target |            |
| 7.  | Low molecular weight phosphotyrosine protein phosphatase | ACP1        | ethyl oleate                                            | Swiss Target |            |
| 8.  | ADAM Metallopeptidase Domain 10                          | ADAM10      | ethyl oleate                                            |              | SuperPred  |
| 9.  | Adenosine A1 receptor                                    | ADORA1      | fisetin, hesperetin, kaempferol, luteolin               | Swiss Target |            |
| 10. | Adenosine A2a receptor                                   | ADORA2A     | fisetin, kaempferol, luteolin                           | Swiss Target |            |
| 11. | Adenosine A3 receptor                                    | ADORA3      | hesperetin                                              | Swiss Target |            |
| 12. | Adenosylhomocysteinase                                   | AHCY        | ethyl oleate                                            |              | SuperPred  |
| 13. | Aryl hydrocarbon receptor                                | AHR         | fisetin, kaempferol, luteolin                           | Swiss Target |            |
| 14. | Aldehyde reductase                                       | AKR1A1      | fisetin, kaempferol, luteolin                           | Swiss Target |            |
| 15. | Aldose reductase                                         | AKR1B1      | fisetin, hesperetin, kaempferol, luteolin               | Swiss Target |            |
| 16. | Aldo-keto reductase family 1 member B10                  | AKR1B10     | ethyl oleate, fisetin, kaempferol, luteolin             | Swiss Target |            |
| 17. | Aldo-keto reductase family 1 member C1                   | AKR1C1      | ethyl oleate, fisetin, kaempferol, luteolin             | Swiss Target |            |
| 18. | Aldo-keto reductase family 1 member C2                   | AKR1C2      | ethyl oleate, fisetin, kaempferol, luteolin             | Swiss Target | SuperPred  |
| 19. | Aldo-keto-reductase family 1 member C3                   | AKR1C3      | ethyl oleate, fisetin, hesperetin, kaempferol, luteolin | Swiss Target |            |
| 20. | Aldo-keto-reductase family 1 member C4                   | AKR1C4      | kaempferol, luteolin                                    | Swiss Target |            |
| 21. | Serine/threonine-protein kinase AKT                      | AKT1        | fisetin, kaempferol, luteolin                           | Swiss Target |            |
| 22. | ALK tyrosine kinase receptor                             | ALK         | kaempferol, luteolin                                    | Swiss Target |            |
| 23. | Arachidonate 12-lipoxygenase                             | ALOX12      | fisetin, hesperetin, kaempferol, luteolin               | Swiss Target |            |

|     |                                                  |        |                                                         |              |           |
|-----|--------------------------------------------------|--------|---------------------------------------------------------|--------------|-----------|
| 24. | Arachidonate 15-lipoxygenase                     | ALOX15 | fisetin, kaempferol, luteolin                           | Swiss Target |           |
| 25. | Arachidonate 5-lipoxygenase                      | ALOX5  | ethyl oleate, fisetin, kaempferol, luteolin             | Swiss Target | SuperPred |
| 26. | Alkaline phosphatase, tissue-nonspecific isozyme | ALPL   | catechin, ethyl oleate                                  | Swiss Target | SuperPred |
| 27. | Alpha-Amylase 1A                                 | AMY1A  | kaempferol, luteolin                                    | Swiss Target |           |
| 28. | Aminopeptidase N                                 | ANPEP  | ethyl oleate                                            |              | SuperPred |
| 29. | Amine oxidase, copper containing                 | AOC3   | ethyl oleate                                            |              | SuperPred |
| 30. | DNA-(apurinic or apyrimidinic site) lyase        | APEX1  | ethyl oleate, fisetin                                   | Swiss Target | SuperPred |
| 31. | APH1A Gamma Secretase Subunit                    | APH1A  | ethyl oleate                                            | Swiss Target |           |
| 32. | APH1B Gamma Secretase Subunit                    | APH1B  | ethyl oleate                                            | Swiss Target |           |
| 33. | Beta amyloid A4 protein                          | APP    | ethyl oleate, fisetin, hesperetin, kaempferol, luteolin | Swiss Target |           |
| 34. | Androgen Receptor                                | AR     | ethyl oleate, luteolin                                  | Swiss Target | SuperPred |
| 35. | Arginase-1                                       | ARG1   | fisetin, kaempferol, luteolin                           | Swiss Target |           |
| 36. | Potassium-transporting ATPase alpha chain 2      | ATP12A | ethyl oleate                                            | Swiss Target |           |
| 37. | Potassium-transporting ATPase                    | ATP4A  | hesperetin                                              | Swiss Target |           |
| 38. | Potassium-transporting ATPase                    | ATP4B  | hesperetin                                              | Swiss Target |           |
| 39. | Serine/threonine-protein kinase Aurora-A         | AURKA  | hesperetin                                              | Swiss Target |           |
| 40. | Aurora kinase B/Inner centromere protein         | AURKB  | ethyl oleate, fisetin, kaempferol, luteolin             | Swiss Target | SuperPred |
| 41. | Vasopressin V2 receptor                          | AVPR2  | fisetin, kaempferol, luteolin                           | Swiss Target |           |
| 42. | Tyrosine-protein kinase receptor UFO             | AXL    | fisetin, kaempferol, luteolin                           | Swiss Target |           |
| 43. | Beta-secretase 1                                 | BACE1  | fisetin, hesperetin, kaempferol, luteolin               | Swiss Target |           |
| 44. | Apoptosis regulator Bcl-2                        | BCL2   | hesperetin                                              | Swiss Target |           |
| 45. | C5a anaphylatoxin chemotactic receptor           | C5AR1  | ethyl oleate                                            |              | SuperPred |
| 46. | Carbonic anhydrase I                             | CA1    | fisetin, hesperetin, kaempferol, luteolin               | Swiss Target |           |
| 47. | Carbonic anhydrase XII                           | CA12   | fisetin, hesperetin, kaempferol, luteolin               | Swiss Target | SuperPred |
| 48. | Carbonic anhydrase XIII                          | CA13   | fisetin, hesperetin, kaempferol, luteolin               | Swiss Target |           |
| 49. | Carbonic anhydrase XIV                           | CA14   | fisetin, kaempferol, luteolin                           | Swiss Target |           |
| 50. | Carbonic anhydrase II                            | CA2    | fisetin, hesperetin, kaempferol, luteolin               | Swiss Target |           |
| 51. | Carbonic anhydrase III                           | CA3    | ethyl oleate, fisetin, hesperetin, kaempferol, luteolin | Swiss Target | SuperPred |

|     |                                                       |         |                                                         |              |           |
|-----|-------------------------------------------------------|---------|---------------------------------------------------------|--------------|-----------|
| 52. | Carbonic anhydrase IV                                 | CA4     | fisetin, hesperetin, kaempferol, luteolin               | Swiss Target | SuperPred |
| 53. | Carbonic anhydrase VA                                 | CA5A    | fisetin, hesperetin, kaempferol, luteolin               | Swiss Target |           |
| 54. | Carbonic anhydrase VB                                 | CA5B    | hesperetin                                              | Swiss Target |           |
| 55. | Carbonic anhydrase VI                                 | CA6     | fisetin, hesperetin, kaempferol, luteolin               | Swiss Target |           |
| 56. | Carbonic anhydrase VII                                | CA7     | catechin, fisetin, hesperetin, kaempferol, luteolin     | Swiss Target | SuperPred |
| 57. | Carbonic anhydrase IX                                 | CA9     | fisetin, hesperetin, kaempferol, luteolin               | Swiss Target |           |
| 58. | Voltage-gated L-type calcium channel alpha-1C subunit | CACNA1C | ethyl oleate                                            |              | SuperPred |
| 59. | Calcitonin gene-related peptide 1                     | CALCA   | ethyl oleate                                            | Swiss Target |           |
| 60. | CaM kinase II beta                                    | CAMK2B  | fisetin, hesperetin, kaempferol, luteolin               | Swiss Target |           |
| 61. | Calpain 1                                             | CAPN1   | ethyl oleate                                            | Swiss Target | SuperPred |
| 62. | Carbonyl reductase [NADPH] 1                          | CBR1    | hesperetin                                              | Swiss Target |           |
| 63. | Cyclin-dependent kinase 2/cyclin A                    | CCNA1   | hesperetin                                              | Swiss Target |           |
| 64. | Cyclin-dependent kinase 2/cyclin A                    | CCNA2   | hesperetin                                              | Swiss Target |           |
| 65. | Cyclin-dependent kinase 1/cyclin B                    | CCNB1   | fisetin, hesperetin                                     | Swiss Target |           |
| 66. | Cyclin-dependent kinase 1/cyclin B                    | CCNB2   | fisetin, kaempferol, luteolin                           | Swiss Target |           |
| 67. | Cyclin-dependent kinase 1/cyclin B                    | CCNB3   | fisetin, kaempferol, luteolin                           | Swiss Target |           |
| 68. | Cyclin-dependent kinase 2/cyclin E1                   | CCNE1   | hesperetin                                              | Swiss Target |           |
| 69. | Cyclin T1                                             | CCNT1   | ethyl oleate                                            | Swiss Target |           |
| 70. | Lymphocyte differentiation antigen CD38               | CD38    | ethyl oleate                                            |              | SuperPred |
| 71. | CD81 antigen                                          | CD81    | ethyl oleate                                            | Swiss Target |           |
| 72. | Cyclin-dependent kinase 1/cyclin B1                   | CDK1    | ethyl oleate, fisetin, hesperetin, kaempferol, luteolin | Swiss Target | SuperPred |
| 73. | Cyclin-dependent kinase 2/cyclin A                    | CDK2    | hesperetin                                              | Swiss Target |           |
| 74. | Cyclin-dependent kinase 5/CDK5 activator 1            | CDK5    | ethyl oleate, fisetin, kaempferol, luteolin             | Swiss Target | SuperPred |
| 75. | Cyclin-dependent kinase 5/CDK5 activator 1            | CDK5R1  | fisetin, kaempferol, luteolin                           | Swiss Target |           |
| 76. | Cyclin-dependent kinase 6                             | CDK6    | fisetin, kaempferol, luteolin                           | Swiss Target | SuperPred |
| 77. | Acyl coenzyme A: cholesterol acyltransferase          | CES1    | ethyl oleate, hesperetin                                | Swiss Target | SuperPred |
| 78. | Carboxylesterase 2                                    | CES2    | ethyl oleate, hesperetin                                | Swiss Target | SuperPred |
| 79. | Cholesteryl ester transfer protein                    | CETP    | ethyl oleate                                            | Swiss Target |           |

|      |                                                         |         |                                                         |              |           |
|------|---------------------------------------------------------|---------|---------------------------------------------------------|--------------|-----------|
| 80.  | Cystic fibrosis transmembrane conductance regulator     | CFTR    | kaempferol, luteolin                                    | Swiss Target |           |
| 81.  | Serine/threonine-protein kinase Chk1                    | CHEK1   | hesperetin                                              | Swiss Target |           |
| 82.  | Neuronal acetylcholine receptor protein alpha-7 subunit | CHRNA7  | hesperetin                                              | Swiss Target |           |
| 83.  | Neuronal acetylcholine receptor; alpha4/beta4           | CHRNA4  | ethyl oleate                                            |              | SuperPred |
| 84.  | CDGS iron-sulfur domain-containing protein 1            | CISD1   | kaempferol                                              |              | SuperPred |
| 85.  | Dual specificity protein kinase CLK4                    | CLK4    | ethyl oleate                                            |              | SuperPred |
| 86.  | Cannabinoid receptor 1                                  | CNR1    | ethyl oleate                                            | Swiss Target |           |
| 87.  | Cannabinoid CB2 receptor                                | CNR2    | ethyl oleate                                            | Swiss Target | SuperPred |
| 88.  | Carnitine palmitoyltransferase 2                        | CPT2    | ethyl oleate                                            |              | SuperPred |
| 89.  | Casein kinase II alpha                                  | CSNK2A1 | fisetin, kaempferol, luteolin                           | Swiss Target | SuperPred |
| 90.  | Casein kinase II alpha/beta                             | CSNK2B  | ethyl oleate                                            |              | SuperPred |
| 91.  | Chymotrypsin C                                          | CTRC    | ethyl oleate                                            | Swiss Target |           |
| 92.  | Cathepsin D                                             | CTSD    | ethyl oleate                                            |              | SuperPred |
| 93.  | Interleukin-8 receptor A                                | CXCR1   | fisetin, kaempferol, luteolin                           | Swiss Target |           |
| 94.  | Cytochrome P450 17A1                                    | CYP17A1 | ethyl oleate                                            | Swiss Target |           |
| 95.  | Cytochrome P450 19A1                                    | CYP19A1 | ethyl oleate, fisetin, hesperetin, kaempferol, luteolin | Swiss Target |           |
| 96.  | Cytochrome P450 1B1                                     | CYP1B1  | fisetin, hesperetin, kaempferol, luteolin               | Swiss Target | SuperPred |
| 97.  | Cytochrome P450 2A6                                     | CYP2A6  | ethyl oleate                                            |              | SuperPred |
| 98.  | Cytochrome P450 2C19                                    | CYP2C19 | ethyl oleate                                            | Swiss Target |           |
| 99.  | Cytochrome P450 3A4                                     | CYP3A4  | ethyl oleate                                            |              | SuperPred |
| 100. | Cytochrome P450 51                                      | CYP51A1 | ethyl oleate                                            | Swiss Target |           |
| 101. | Cysteinyl leukotriene receptor 2                        | CYSLTR2 | ethyl oleate                                            |              | SuperPred |
| 102. | Death-associated protein kinase 1                       | DAPK1   | fisetin, kaempferol, luteolin                           | Swiss Target |           |
| 103. | Deoxycytidine kinase                                    | DCK     | ethyl oleate                                            | Swiss Target |           |
| 104. | dCTP pyrophosphatase 1                                  | DCTPP1  | ethyl oleate                                            |              | SuperPred |
| 105. | Dihydrofolate reductase                                 | DHFR    | ethyl oleate                                            |              | SuperPred |
| 106. | Dynamin-1                                               | DNM1    | hesperetin                                              | Swiss Target |           |



|      |                                                               |        |                                             |              |           |
|------|---------------------------------------------------------------|--------|---------------------------------------------|--------------|-----------|
| 107. | DNA (cytosine-5)-methyltransferase 1                          | DNMT1  | hesperetin                                  | Swiss Target |           |
| 108. | Dipeptidyl peptidase IV                                       | DPP4   | hesperetin, kaempferol, luteolin            |              | SuperPred |
| 109. | Dipeptidyl peptidase VIII                                     | DPP8   | ethyl oleate                                |              | SuperPred |
| 110. | Dipeptidyl peptidase IX                                       | DPP9   | ethyl oleate                                |              | SuperPred |
| 111. | Dopamine D4 receptor                                          | DRD4   | fisetin, kaempferol, luteolin               | Swiss Target |           |
| 112. | Dual specificity protein phosphatase 3                        | DUSP3  | hesperetin                                  | Swiss Target | SuperPred |
| 113. | Dual-specificity tyrosine-phosphorylation regulated kinase 1A | DYRK1A | hesperetin                                  | Swiss Target |           |
| 114. | Endothelin receptor ET-A                                      | EDNRA  | hesperetin                                  | Swiss Target |           |
| 115. | Epidermal growth factor receptor erbB1                        | EGFR   | fisetin, kaempferol, luteolin               | Swiss Target |           |
| 116. | Endothelial PAS domain-containing protein 1                   | EPAS1  | ethyl oleate                                | Swiss Target |           |
| 117. | Epoxide hydrolase 1                                           | EPHX1  | ethyl oleate                                | Swiss Target | SuperPred |
| 118. | Endoplasmic reticulum aminopeptidase 2                        | ERAP2  | ethyl oleate                                | Swiss Target | SuperPred |
| 119. | Serine/threonine-protein kinase/endoribonuclease IRE1         | ERN1   | hesperetin                                  | Swiss Target |           |
| 120. | Estrogen receptor alpha                                       | ESR1   | hesperetin, kaempferol, luteolin            | Swiss Target |           |
| 121. | Estrogen receptor beta                                        | ESR2   |                                             | Swiss Target |           |
| 122. | Estrogen-related receptor alpha                               | ESRRA  | fisetin, kaempferol, luteolin               | Swiss Target |           |
| 123. | Thrombin and coagulation factor X                             | F10    | ethyl oleate                                | Swiss Target |           |
| 124. | Thrombin                                                      | F2     | ethyl oleate, fisetin, kaempferol, luteolin | Swiss Target |           |
| 125. | Proteinase-activated receptor 1                               | F2R    | ethyl oleate                                | Swiss Target |           |
| 126. | Anandamide amidohydrolase                                     | FAAH   | ethyl oleate                                | Swiss Target |           |
| 127. | Fatty acid-binding protein 1 (liver)                          | FABP1  | ethyl oleate                                | Swiss Target |           |
| 128. | Fatty acid-binding protein 3 (muscle and heart)               | FABP3  | ethyl oleate                                | Swiss Target |           |
| 129. | Fatty acid-binding protein 4 (adipocyte)                      | FABP4  | ethyl oleate                                | Swiss Target |           |
| 130. | Fatty acid-binding protein 5 (epidermal)                      | FABP5  | ethyl oleate                                | Swiss Target |           |
| 131. | Free fatty acid receptor 1                                    | FFAR1  | ethyl oleate, hesperetin                    | Swiss Target |           |
| 132. | Tyrosine-protein kinase FGR                                   | FGR    | ethyl oleate                                |              | SuperPred |
| 133. | Vascular endothelial growth factor receptor 1                 | FLT1   | ethyl oleate                                | Swiss Target | SuperPred |

|      |                                                  |         |                                             |              |           |
|------|--------------------------------------------------|---------|---------------------------------------------|--------------|-----------|
| 134. | Tyrosine-protein kinase receptor FLT3            | FLT3    | fisetin, kaempferol, luteolin               | Swiss Target | SuperPred |
| 135. | Protein farnesyltransferase                      | FNTA    | ethyl oleate                                | Swiss Target |           |
| 136. | Protein farnesyltransferase                      | FNTB    | ethyl oleate                                | Swiss Target |           |
| 137. | Formyl peptide receptor 1                        | FPR1    | ethyl oleate                                |              | SuperPred |
| 138. | Lipoxin A4 receptor                              | FPR2    | ethyl oleate                                |              | SuperPred |
| 139. | Fucosyltransferase 4                             | FUT4    | hesperetin                                  | Swiss Target |           |
| 140. | Alpha-(1,3)-fucosyltransferase 7                 | FUT7    | hesperetin                                  | Swiss Target |           |
| 141. | Glucose-6-phosphate 1-dehydrogenase              | G6PD    | ethyl oleate                                | Swiss Target |           |
| 142. | Geranylgeranyl pyrophosphate synthetase          | GGPS1   | ethyl oleate                                |              | SuperPred |
| 143. | Glyoxalase I                                     | GLO1    | fisetin, kaempferol, luteolin               | Swiss Target |           |
| 144. | Glycine receptor subunit alpha-1                 | GLRA1   | ethyl oleate                                |              | SuperPred |
| 145. | Gonadotropin-releasing hormone receptor          | GNRHR   | ethyl oleate                                | Swiss Target |           |
| 146. | G-protein coupled bile acid receptor 1           | GPBAR1  | ethyl oleate                                |              | SuperPred |
| 147. | Glucose-dependent insulinotropic receptor        | GPR119  | ethyl oleate                                | Swiss Target |           |
| 148. | Uracil nucleotide/cysteinyl leukotriene receptor | GPR17   | ethyl oleate                                |              | SuperPred |
| 149. | G-protein coupled receptor 35                    | GPR35   | ethyl oleate, fisetin, kaempferol, luteolin | Swiss Target | SuperPred |
| 150. | Glutamate NMDA receptor; GRIN1/GRIN2B            | GRIN1   | ethyl oleate                                |              | SuperPred |
| 151. | G protein-coupled receptor kinase 6              | GRK6    | kaempferol, luteolin                        | Swiss Target |           |
| 152. | Metabotropic glutamate receptor 2                | GRM2    | hesperetin                                  | Swiss Target |           |
| 153. | Metabotropic glutamate receptor 5                | GRM5    | hesperetin                                  | Swiss Target |           |
| 154. | Glycogen synthase kinase-3 beta                  | GSK3B   | fisetin, kaempferol, luteolin               | Swiss Target |           |
| 155. | Beta-glucuronidase                               | GUSB    | ethyl oleate, hesperetin                    | Swiss Target | SuperPred |
| 156. | Histone deacetylase 10                           | HDAC10  | ethyl oleate                                |              | SuperPred |
| 157. | Histone deacetylase 3                            | HDAC3   | ethyl oleate                                |              | SuperPred |
| 158. | Hypoxia-inducible factor 1 alpha                 | HIF1A   | luteolin                                    | Swiss Target | SuperPred |
| 159. | HMG-CoA reductase                                | HMGCR   | ethyl oleate                                | Swiss Target |           |
| 160. | Histamine H4 receptor                            | HRH4    | ethyl oleate                                | Swiss Target |           |
| 161. | 11-beta-hydroxysteroid dehydrogenase 1           | HSD11B1 | ethyl oleate                                | Swiss Target |           |
| 162. | 11-beta-hydroxysteroid dehydrogenase 2           | HSD11B2 | ethyl oleate                                | Swiss Target |           |

|      |                                                            |         |                                                         |              |           |
|------|------------------------------------------------------------|---------|---------------------------------------------------------|--------------|-----------|
| 163. | Estradiol 17-beta-dehydrogenase 1                          | HSD17B1 | fisetin, hesperetin, kaempferol, luteolin               | Swiss Target |           |
| 164. | Estradiol 17-beta-dehydrogenase 2                          | HSD17B2 | ethyl oleate, fisetin, hesperetin, kaempferol, luteolin | Swiss Target |           |
| 165. | Estradiol 17-beta-dehydrogenase 3                          | HSD17B3 | hesperetin                                              | Swiss Target |           |
| 166. | Serotonin 2c (5-HT2c) receptor                             | HTR2C   | ethyl oleate                                            |              | SuperPred |
| 167. | Insulin-like growth factor I receptor                      | IGF1R   | fisetin, hesperetin, kaempferol, luteolin               | Swiss Target |           |
| 168. | Insulin receptor                                           | INSR    | fisetin                                                 | Swiss Target |           |
| 169. | Histone acetyltransferase KAT6A                            | KAT6A   | ethyl oleate                                            |              | SuperPred |
| 170. | HERG                                                       | KCNH2   | ethyl oleate                                            |              | SuperPred |
| 171. | LSD1/CoREST complex                                        | KDM1A   | ethyl oleate                                            |              | SuperPred |
| 172. | Lysine-specific demethylase 4D-like                        | KDM4E   | fisetin, luteolin                                       | Swiss Target |           |
| 173. | Vascular endothelial growth factor receptor 2              | KDR     | fisetin, hesperetin, kaempferol, luteolin               | Swiss Target |           |
| 174. | Kelch-like ECH-associated protein 1                        | KEAP1   | ethyl oleate                                            |              | SuperPred |
| 175. | Stem cell growth factor receptor                           | KIT     | hesperetin                                              | Swiss Target |           |
| 176. | Kruppel-like factor 5                                      | KLF5    | ethyl oleate                                            |              | SuperPred |
| 177. | Kallikrein 1                                               | KLK1    | hesperetin                                              | Swiss Target |           |
| 178. | Kallikrein 2                                               | KLK2    | hesperetin                                              | Swiss Target |           |
| 179. | Kallikrein 5                                               | KLK5    | ethyl oleate                                            |              | SuperPred |
| 180. | Kallikrein 7                                               | KLK7    | ethyl oleate                                            |              | SuperPred |
| 181. | LIM domain kinase 1                                        | LIMK1   | ethyl oleate                                            | Swiss Target |           |
| 182. | LIM domain kinase 2                                        | LIMK2   | ethyl oleate                                            | Swiss Target |           |
| 183. | Cystinyl aminopeptidase                                    | LNPEP   | ethyl oleate                                            |              | SuperPred |
| 184. | Leukotriene B4 receptor 1                                  | LTB4R   | ethyl oleate                                            | Swiss Target |           |
| 185. | Acyl-protein thioesterase 1                                | LYPLA1  | ethyl oleate                                            | Swiss Target |           |
| 186. | Acyl-protein thioesterase 2                                | LYPLA2  | ethyl oleate                                            | Swiss Target |           |
| 187. | Monoamine oxidase A                                        | MAOA    | fisetin, kaempferol, luteolin                           | Swiss Target |           |
| 188. | Monoamine oxidase B                                        | MAOB    | hesperetin                                              | Swiss Target |           |
| 189. | Dual specificity mitogen-activated protein kinase kinase 2 | MAP2K2  | ethyl oleate                                            |              | SuperPred |

|      |                                                  |           |                                                         |              |           |
|------|--------------------------------------------------|-----------|---------------------------------------------------------|--------------|-----------|
| 190. | Mitogen-activated protein kinase kinase kinase 4 | MAP4K4    | hesperetin                                              | Swiss Target |           |
| 191. | c-Jun N-terminal kinase 1                        | MAPK8     | ethyl oleate                                            | Swiss Target |           |
| 192. | c-Jun N-terminal kinase 2                        | MAPK9     | ethyl oleate                                            | Swiss Target | SuperPred |
| 193. | MAP kinase-activated protein kinase 2            | MAPKAPK 2 | hesperetin                                              | Swiss Target |           |
| 194. | Microtubule-associated protein tau               | MAPT      | fisetin, kaempferol                                     | Swiss Target |           |
| 195. | Melanin-concentrating hormone receptor 1         | MCHR1     | ethyl oleate                                            | Swiss Target |           |
| 196. | Hepatocyte growth factor receptor                | MET       | fisetin, hesperetin, kaempferol, luteolin               | Swiss Target |           |
| 197. | Methionine aminopeptidase 2                      | METAP2    | ethyl oleate                                            |              | SuperPred |
| 198. | Monoglyceride lipase                             | MGLL      | ethyl oleate                                            | Swiss Target |           |
| 199. | Macrophage migration inhibitory factor           | MIF       | ethyl oleate                                            |              | SuperPred |
| 200. | Matrix metalloproteinase 12                      | MMP12     | fisetin, hesperetin, kaempferol, luteolin               | Swiss Target | SuperPred |
| 201. | Matrix metalloproteinase 13                      | MMP13     | fisetin, hesperetin, kaempferol, luteolin               | Swiss Target |           |
| 202. | Matrix metalloproteinase 2                       | MMP2      | fisetin, hesperetin, kaempferol, luteolin               | Swiss Target |           |
| 203. | Matrix metalloproteinase 3                       | MMP3      | ethyl oleate, fisetin, hesperetin, kaempferol, luteolin | Swiss Target |           |
| 204. | Matrix metalloproteinase 8                       | MMP8      | ethyl oleate, hesperetin                                | Swiss Target | SuperPred |
| 205. | Matrix metalloproteinase 9                       | MMP9      | fisetin, hesperetin, kaempferol, luteolin               | Swiss Target |           |
| 206. | DNA-3-methyladenine glycosylase                  | MPG       | fisetin, kaempferol                                     | Swiss Target |           |
| 207. | Myeloperoxidase                                  | MPO       | fisetin, kaempferol, luteolin                           | Swiss Target |           |
| 208. | Myosin light chain kinase, smooth muscle         | MYLK      | fisetin                                                 | Swiss Target |           |
| 209. | N-acylsphingosine-amidohydrolase                 | NAAA      | ethyl oleate                                            | Swiss Target |           |
| 210. | Nicotinamide phosphoribosyltransferase           | NAMPT     | ethyl oleate                                            |              | SuperPred |
| 211. | Gamma-secretase                                  | NCSTN     | ethyl oleate                                            | Swiss Target |           |
| 212. | Serine/threonine-protein kinase NEK2             | NEK2      | fisetin, kaempferol, luteolin                           | Swiss Target |           |
| 213. | Serine/threonine-protein kinase NEK6             | NEK6      | fisetin, kaempferol, luteolin                           | Swiss Target |           |
| 214. | Nuclear factor erythroid 2-related factor 2      | NFE2L2    | ethyl oleate                                            |              | SuperPred |
| 215. | Nuclear factor NF-kappa-B p105 subunit           | NFKB1     | catechin, ethyl oleate                                  |              | SuperPred |

|      |                                                        |        |                                           |              |           |
|------|--------------------------------------------------------|--------|-------------------------------------------|--------------|-----------|
| 216. | NACHT, LRR and PYD domains-containing protein 3        | NLRP3  | ethyl oleate                              | Swiss Target |           |
| 217. | Nitric-oxide synthase, brain                           | NOS1   | ethyl oleate                              | Swiss Target |           |
| 218. | Nitric oxide synthase, inducible                       | NOS2   | ethyl oleate                              | Swiss Target | SuperPred |
| 219. | NADPH oxidase 4                                        | NOX4   | fisetin, hesperetin, kaempferol, luteolin | Swiss Target |           |
| 220. | Quinone reductase 2                                    | NQO2   | ethyl oleate                              |              | SuperPred |
| 221. | LXR-beta                                               | NR1H2  | ethyl oleate                              | Swiss Target |           |
| 222. | LXR-alpha                                              | NR1H3  | ethyl oleate                              | Swiss Target |           |
| 223. | Pregnane X receptor                                    | NR1I2  | ethyl oleate                              |              | SuperPred |
| 224. | Photoreceptor-specific nuclear receptor                | NR2E3  | ethyl oleate                              |              | SuperPred |
| 225. | Glucocorticoid receptor                                | NR3C1  | ethyl oleate                              | Swiss Target |           |
| 226. | Mineralocorticoid receptor                             | NR3C2  | ethyl oleate                              | Swiss Target |           |
| 227. | Nuclear receptor subfamily 4 group A member 1          | NR4A1  | ethyl oleate                              |              | SuperPred |
| 228. | Nerve growth factor receptor Trk-A                     | NTRK1  | hesperetin                                | Swiss Target |           |
| 229. | NT-3 growth factor receptor                            | NTRK3  | ethyl oleate                              |              | SuperPred |
| 230. | Neurotensin receptor 2                                 | NTSR2  | ethyl oleate                              |              | SuperPred |
| 231. | NUAK family SNF1-like kinase 1                         | NUAK1  | fisetin, kaempferol, luteolin             | Swiss Target |           |
| 232. | Ornithine decarboxylase                                | ODC1   | hesperetin                                | Swiss Target |           |
| 233. | Purinergic receptor P2Y12                              | P2RY12 | ethyl oleate                              | Swiss Target | SuperPred |
| 234. | Poly [ADP-ribose] polymerase-1                         | PARP1  | fisetin, hesperetin, kaempferol, luteolin | Swiss Target |           |
| 235. | Phosphodiesterase 10A                                  | PDE10A | ethyl oleate                              | Swiss Target |           |
| 236. | Phosphodiesterase 3B                                   | PDE3B  | ethyl oleate                              |              | SuperPred |
| 237. | Platelet-derived growth factor receptor alpha          | PDGFRA | ethyl oleate                              |              | SuperPred |
| 238. | Platelet-derived growth factor receptor beta           | PDGFRB | ethyl oleate, hesperetin                  | Swiss Target | SuperPred |
| 239. | 6-phosphofructo-2-kinase/fructose-2,6-bisphosphatase 3 | PFKFB3 | ethyl oleate                              | Swiss Target |           |
| 240. | 6-phosphogluconate dehydrogenase                       | PGD    | hesperetin                                | Swiss Target |           |
| 241. | Progesterone receptor                                  | PGR    | ethyl oleate                              | Swiss Target |           |
| 242. | PI3-kinase p110-alpha subunit                          | PIK3CA | ethyl oleate                              |              | SuperPred |

|      |                                                        |         |                                                         |              |           |
|------|--------------------------------------------------------|---------|---------------------------------------------------------|--------------|-----------|
| 243. | PI3-kinase p110-beta subunit                           | PIK3CB  | ethyl oleate                                            |              | SuperPred |
| 244. | PI3-kinase p110-delta subunit                          | PIK3CD  | ethyl oleate                                            | Swiss Target | SuperPred |
| 245. | PI3-kinase p110-gamma subunit                          | PIK3CG  | ethyl oleate, fisetin                                   | Swiss Target | SuperPred |
| 246. | PI3-kinase p110-alpha/p85-alpha                        | PIK3R1  | ethyl oleate, fisetin, kaempferol, luteolin             | Swiss Target | SuperPred |
| 247. | Serine/threonine-protein kinase PIM1                   | PIM1    | fisetin, hesperetin                                     | Swiss Target |           |
| 248. | Serine/threonine-protein kinase PIM2                   | PIM2    | hesperetin                                              | Swiss Target |           |
| 249. | Serine/threonine-protein kinase PIM3                   | PIM3    | hesperetin                                              | Swiss Target |           |
| 250. | Peptidyl-prolyl cis-trans isomerase NIMA-interacting 1 | PIN1    | ethyl oleate                                            | Swiss Target |           |
| 251. | Protein kinase N1                                      | PKN1    | fisetin, kaempferol, luteolin                           | Swiss Target |           |
| 252. | Group X secretory phospholipase A2                     | PLA2G10 | hesperetin                                              | Swiss Target |           |
| 253. | Phospholipase A2 group 1B                              | PLA2G1B | ethyl oleate, fisetin, hesperetin, kaempferol, luteolin | Swiss Target |           |
| 254. | Phospholipase A2 group IIA                             | PLA2G2A | ethyl oleate, hesperetin                                | Swiss Target | SuperPred |
| 255. | Cytosolic phospholipase A2                             | PLA2G4A | ethyl oleate                                            | Swiss Target |           |
| 256. | Phospholipase A2 group V                               | PLA2G5  | hesperetin                                              | Swiss Target |           |
| 257. | Plasminogen                                            | PLG     | hesperetin, luteolin                                    | Swiss Target |           |
| 258. | Serine/threonine-protein kinase PLK1                   | PLK1    | fisetin, kaempferol, luteolin                           | Swiss Target |           |
| 259. | Purine nucleoside phosphorylase                        | PNP     | hesperetin                                              | Swiss Target |           |
| 260. | DNA polymerase alpha subunit                           | POLA1   | ethyl oleate                                            | Swiss Target |           |
| 261. | DNA polymerase beta                                    | POLB    | hesperetin                                              | Swiss Target |           |
| 262. | Peroxisome proliferator-activated receptor alpha       | PPARA   | ethyl oleate                                            | Swiss Target |           |
| 263. | Peroxisome proliferator-activated receptor delta       | PPARD   | ethyl oleate                                            | Swiss Target |           |
| 264. | Peroxisome proliferator-activated receptor gamma       | PPARG   | ethyl oleate, hesperetin                                | Swiss Target |           |
| 265. | Protein kinase C alpha                                 | PRKCA   | ethyl oleate                                            | Swiss Target | SuperPred |
| 266. | Protein kinase C delta                                 | PRKCD   | ethyl oleate                                            | Swiss Target | SuperPred |
| 267. | Protein kinase C eta                                   | PRKCH   | ethyl oleate                                            | Swiss Target |           |
| 268. | Protein kinase C theta                                 | PRKCC   | ethyl oleate                                            | Swiss Target |           |
| 269. | Protein-arginine N-methyltransferase 1                 | PRMT1   | hesperetin                                              | Swiss Target |           |

|      |                                                    |         |                                    |              |           |
|------|----------------------------------------------------|---------|------------------------------------|--------------|-----------|
| 270. | Presenilin 1                                       | PSEN1   | ethyl oleate                       | Swiss Target |           |
| 271. | Presenilin 2                                       | PSEN2   | ethyl oleate                       | Swiss Target |           |
| 272. | Presenilin Enhancer, Gamma-Secretase Subunit       | PSENEN  | ethyl oleate                       | Swiss Target |           |
| 273. | Proteasome subunit beta type-9                     | PSMB9   | ethyl oleate                       |              | SuperPred |
| 274. | Prostanoid EP1 receptor                            | PTGER1  | ethyl oleate                       |              | SuperPred |
| 275. | Prostanoid EP2 receptor                            | PTGER2  | ethyl oleate                       | Swiss Target |           |
| 276. | Prostaglandin E synthase                           | PTGES   | ethyl oleate                       | Swiss Target |           |
| 277. | Prostanoid IP receptor                             | PTGIR   | ethyl oleate                       | Swiss Target |           |
| 278. | Cyclooxygenase-1                                   | PTGS1   | ethyl oleate, hesperetin           | Swiss Target | SuperPred |
| 279. | Cyclooxygenase-2                                   | PTGS2   | ethyl oleate, kaempferol, luteolin | Swiss Target | SuperPred |
| 280. | Focal adhesion kinase 1                            | PTK2    | fisetin, kaempferol, luteolin      | Swiss Target |           |
| 281. | Protein-tyrosine phosphatase 1B                    | PTPN1   | ethyl oleate                       | Swiss Target | SuperPred |
| 282. | Protein-tyrosine phosphatase 2C                    | PTPN11  | ethyl oleate                       |              | SuperPred |
| 283. | Protein-tyrosine phosphatase 1E                    | PTPN13  | ethyl oleate                       | Swiss Target |           |
| 284. | T-cell protein-tyrosine phosphatase                | PTPN2   | ethyl oleate                       | Swiss Target | SuperPred |
| 285. | Protein-tyrosine phosphatase 1C                    | PTPN6   | ethyl oleate                       | Swiss Target |           |
| 286. | Leukocyte common antigen                           | PTPRC   | ethyl oleate                       | Swiss Target |           |
| 287. | Receptor-type tyrosine-protein phosphatase F (LAR) | PTPRF   | ethyl oleate                       | Swiss Target |           |
| 288. | Receptor-type tyrosine-protein phosphatase S       | PTPRS   | fisetin, kaempferol, luteolin      | Swiss Target |           |
| 289. | Liver glycogen phosphorylase                       | PYGL    | fisetin, kaempferol, luteolin      | Swiss Target |           |
| 290. | Serine/threonine-protein kinase RAF                | RAF1    | ethyl oleate, hesperetin           | Swiss Target |           |
| 291. | Rho-associated protein kinase 1                    | ROCK1   | ethyl oleate                       | Swiss Target |           |
| 292. | Rho-associated protein kinase 2                    | ROCK2   | ethyl oleate                       | Swiss Target |           |
| 293. | Nuclear receptor ROR-beta                          | RORB    | ethyl oleate                       |              | SuperPred |
| 294. | Ribosomal protein S6 kinase alpha 5                | RPS6KA5 | ethyl oleate                       |              | SuperPred |
| 295. | Relaxin receptor 1                                 | RXFP1   | ethyl oleate                       |              | SuperPred |
| 296. | Retinoid X receptor alpha                          | RXRA    | hesperetin                         | Swiss Target |           |
| 297. | Retinoid X receptor beta                           | RXRB    | ethyl oleate                       |              | SuperPred |

|      |                                                                        |          |                                           |              |           |
|------|------------------------------------------------------------------------|----------|-------------------------------------------|--------------|-----------|
| 298. | Sphingosine 1-phosphate receptor Edg-5                                 | S1PR2    | ethyl oleate                              |              | SuperPred |
| 299. | Sphingosine 1-phosphate receptor Edg-3                                 | S1PR3    | ethyl oleate                              |              | SuperPred |
| 300. | Sphingosine 1-phosphate receptor Edg-8                                 | S1PR5    | ethyl oleate                              |              | SuperPred |
| 301. | Acyl-CoA desaturase                                                    | SCD      | ethyl oleate                              | Swiss Target |           |
| 302. | Sodium channel protein type II alpha subunit                           | SCN2A    | ethyl oleate                              |              | SuperPred |
| 303. | Sodium channel protein type III alpha subunit                          | SCN3A    | ethyl oleate                              |              | SuperPred |
| 304. | Sodium channel protein type IV alpha subunit                           | SCN4A    | ethyl oleate                              |              | SuperPred |
| 305. | Corticosteroid binding globulin                                        | SERPINA6 | ethyl oleate                              | Swiss Target |           |
| 306. | Plasminogen activator inhibitor 1                                      | SERPINE1 | hesperetin                                | Swiss Target | SuperPred |
| 307. | Testis-specific androgen-binding protein                               | SHBG     | ethyl oleate, hesperetin                  | Swiss Target |           |
| 308. | Solute carrier family 22 member 12                                     | SLC22A12 | fisetin, kaempferol                       | Swiss Target |           |
| 309. | Solute carrier family 40 member 1                                      | SLC40A1  | ethyl oleate                              |              | SuperPred |
| 310. | Sodium/glucose cotransporter 2                                         | SLC5A2   | hesperetin                                | Swiss Target |           |
| 311. | Glycine transporter 2                                                  | SLC6A5   | ethyl oleate                              |              | SuperPred |
| 312. | Sodium/hydrogen exchanger 1                                            | SLC9A1   | ethyl oleate                              |              | SuperPred |
| 313. | Acyl coenzyme A: cholesterol acyltransferase 1                         | SOAT1    | ethyl oleate                              | Swiss Target |           |
| 314. | Acyl coenzyme A: cholesterol acyltransferase 2                         | SOAT2    | ethyl oleate                              | Swiss Target |           |
| 315. | Squalene monooxygenase                                                 | SQLE     | hesperetin                                | Swiss Target |           |
| 316. | Tyrosine-protein kinase SRC                                            | SRC      | fisetin, hesperetin, kaempferol, luteolin | Swiss Target |           |
| 317. | CMP-N-acetylneuramate-beta-1,4-galactoside alpha-2,3-sialyltransferase | ST3GAL3  | hesperetin                                | Swiss Target |           |
| 318. | Signal transducer and activator of transcription 1-alpha/beta          | STAT1    | hesperetin                                | Swiss Target | SuperPred |
| 319. | Tyrosine-protein kinase SYK                                            | SYK      | fisetin, kaempferol, luteolin             | Swiss Target |           |
| 320. | Neurokinin 2 receptor                                                  | TACR2    | ethyl oleate                              | Swiss Target |           |
| 321. | Neurokinin 3 receptor                                                  | TACR3    | ethyl oleate                              | Swiss Target |           |
| 322. | Serine/threonine-protein kinase TAO1                                   | TAOK1    | ethyl oleate                              |              | SuperPred |
| 323. | Serine/threonine-protein kinase TAO3                                   | TAOK3    | ethyl oleate                              |              | SuperPred |
| 324. | Taste receptor type 2 member 31                                        | TAS2R31  | ethyl oleate, hesperetin                  | Swiss Target |           |



|      |                                               |        |                                                         |              |           |
|------|-----------------------------------------------|--------|---------------------------------------------------------|--------------|-----------|
| 325. | Tyrosyl-DNA phosphodiesterase 1               | TDP1   | ethyl oleate                                            |              | SuperPred |
| 326. | Telomerase reverse transcriptase              | TERT   | ethyl oleate, fisetin, hesperetin, kaempferol, luteolin | Swiss Target |           |
| 327. | Toll-like receptor 4                          | TLR4   | ethyl oleate                                            |              | SuperPred |
| 328. | Tankyrase-1                                   | TNKS   | fisetin, hesperetin, kaempferol, luteolin               | Swiss Target |           |
| 329. | Tankyrase-2                                   | TNKS2  | fisetin, hesperetin, kaempferol, luteolin               | Swiss Target |           |
| 330. | DNA topoisomerase I                           | TOP1   | ethyl oleate, fisetin, hesperetin, kaempferol, luteolin | Swiss Target | SuperPred |
| 331. | DNA topoisomerase II alpha                    | TOP2A  | ethyl oleate, fisetin                                   |              |           |
| 332. | Transcription intermediary factor 1-alpha     | TRIM24 | ethyl oleate                                            | ,            | SuperPred |
| 333. | Transthyretin                                 | TTR    | fisetin, kaempferol, luteolin                           | Swiss Target | SuperPred |
| 334. | Tyrosinase                                    | TYR    | fisetin, kaempferol, luteolin                           | Swiss Target |           |
| 335. | Vascular endothelial growth factor receptor 2 | VEGFR2 | ethyl oleate                                            |              | SuperPred |
| 336. | Xanthine dehydrogenase                        | XDH    | fisetin, kaempferol, luteolin                           | Swiss Target |           |

**Supplementary Table S3: Target genes of Atherosclerosis**

| No | Target                                                            | Common name | Database 1 | Database 2 | Database 3 |
|----|-------------------------------------------------------------------|-------------|------------|------------|------------|
| 1  | APOBEC1 Complementation Factor                                    | A1CF        |            | GeneCard   |            |
| 2  | Alpha-2-Macroglobulin                                             | A2M         |            | GeneCard   | DisGenet   |
| 3  | Aortic aneurysm, familial abdominal 1                             | AAA1        |            |            | DisGenet   |
| 4  | Aladin WD repeat nucleoporin                                      | AAAS        |            |            | DisGenet   |
| 5  | AP2 Associated Kinase 1                                           | AAK1        |            | GeneCard   |            |
| 6  | Angio Associated Migratory Cell Protein                           | AAMP        |            | GeneCard   |            |
| 7  | Aortic Aneurysm, Familial Thoracic 1                              | AAT1        |            | GeneCard   |            |
| 8  | Aortic Aneurysm, Familial Thoracic 2                              | AAT2        |            | GeneCard   |            |
| 9  | Adeno-Associated Virus Integration Site 1                         | AAVS1       |            | GeneCard   |            |
| 10 | 4-Aminobutyrate Aminotransferase                                  | ABAT        |            | GeneCard   |            |
| 11 | ATP Binding Cassette Subfamily A Member 1                         | ABCA1       | OMIM       | GeneCard   | DisGenet   |
| 12 | ATP Binding Cassette Subfamily A Member 12                        | ABCA12      |            | GeneCard   | DisGenet   |
| 13 | ATP Binding Cassette Subfamily A Member 13                        | ABCA13      |            | GeneCard   |            |
| 14 | ATP Binding Cassette Subfamily A Member 2                         | ABCA2       |            | GeneCard   |            |
| 15 | ATP Binding Cassette Subfamily A Member 3                         | ABCA3       |            | GeneCard   |            |
| 16 | ATP Binding Cassette Subfamily A Member 4                         | ABCA4       |            | GeneCard   | DisGenet   |
| 17 | ATP Binding Cassette Subfamily A Member 5                         | ABCA5       |            | GeneCard   |            |
| 18 | ATP Binding Cassette Subfamily A Member 7                         | ABCA7       |            | GeneCard   |            |
| 19 | ATP Binding Cassette Subfamily A Member 8                         | ABCA8       |            | GeneCard   |            |
| 20 | ATP Binding Cassette Subfamily B Member 1                         | ABCB1       |            | GeneCard   |            |
| 21 | ATP Binding Cassette Subfamily B Member 11                        | ABCB11      |            | GeneCard   |            |
| 22 | ATP Binding Cassette Subfamily B Member 4                         | ABCB4       |            | GeneCard   |            |
| 23 | ATP Binding Cassette Subfamily B member 6 (Langereis blood group) | ABCB6       |            |            | DisGenet   |
| 24 | ATP Binding Cassette Subfamily C Member 1                         | ABCC1       |            | GeneCard   | DisGenet   |

|    |                                                                                      |          |      |          |          |
|----|--------------------------------------------------------------------------------------|----------|------|----------|----------|
| 25 | ATP Binding cassette Subfamily C member 11                                           | ABCC11   |      |          | DisGenet |
| 26 | ATP Binding Cassette Subfamily C Member 2                                            | ABCC2    |      | GeneCard |          |
| 27 | ATP Binding Cassette Subfamily C Member 6                                            | ABCC6    |      | GeneCard | DisGenet |
| 28 | ATP Binding Cassette Subfamily C Member 8                                            | ABCC8    |      | GeneCard | DisGenet |
| 29 | ATP Binding Cassette Subfamily C Member 9                                            | ABCC9    |      | GeneCard |          |
| 30 | ATP Binding Cassette Subfamily D Member 1                                            | ABCD1    |      | GeneCard | DisGenet |
| 31 | ATP Binding Cassette Subfamily G Member 1                                            | ABCG1    |      | GeneCard | DisGenet |
| 32 | ATP Binding Cassette Subfamily G Member 2 (Junior Blood Group)                       | ABCG2    |      | GeneCard | DisGenet |
| 33 | ATP Binding Cassette Subfamily G Member 4                                            | ABCG4    |      | GeneCard |          |
| 34 | ATP-Binding Cassette, Subfamily G, member 5                                          | ABCG5    | OMIM | GeneCard | DisGenet |
| 35 | ATP-Binding Cassette, Subfamily G, member 8                                          | ABCG8    | OMIM | GeneCard | DisGenet |
| 36 | Abhydrolase Domain Containing 2                                                      | ABHD2    |      |          | DisGenet |
| 37 | Abhydrolase Domain Containing 5, Lysophosphatidic Acid Acyltransferase               | ABHD5    |      | GeneCard |          |
| 38 | Abl Interactor 1                                                                     | ABI1     |      | GeneCard | DisGenet |
| 39 | Abl Interactor 2                                                                     | ABI2     |      | GeneCard | DisGenet |
| 40 | ABL Proto-Oncogene 1, Non-Receptor Tyrosine Kinase                                   | ABL1     |      | GeneCard |          |
| 41 | ABO, Alpha 1-3-N-Acetylgalactosaminyltransferase and Alpha 1-3-Galactosyltransferase | ABO      |      | GeneCard | DisGenet |
| 42 | ABR activator of RhoGEF and GTPase                                                   | ABR      |      |          | DisGenet |
| 43 | Abraxas 2, BRISC Complex Subunit                                                     | ABRAXAS2 |      | GeneCard |          |
| 44 | Acetyl-CoA Carboxylase Alpha                                                         | ACACA    |      | GeneCard | DisGenet |
| 45 | Acyl-CoA Dehydrogenase Family Member 8                                               | ACAD8    |      | GeneCard |          |
| 46 | Acyl-CoA Dehydrogenase Very Long Chain                                               | ACADVL   |      | GeneCard |          |
| 47 | AggreCAN                                                                             | ACAN     |      | GeneCard | DisGenet |
| 48 | Acetyl-Coenzyme A acetyltransferase-1 (acetoacetyl Coenzyme A thiolase)              | ACAT1    | OMIM | GeneCard | DisGenet |
| 49 | Acetyl-CoA Acetyltransferase 2                                                       | ACAT2    |      | GeneCard |          |
| 50 | Acyl-CoA Binding Domain Containing 3                                                 | ACBD3    |      | GeneCard |          |
| 51 | 1-aminocyclopropane-1-carboxylate synthase homolog (inactive)                        | ACCS     |      |          | DisGenet |
| 52 | Angiotensin I Converting Enzyme                                                      | ACE      |      | GeneCard | DisGenet |
| 53 | Angiotensin Converting Enzyme 2                                                      | ACE2     |      | GeneCard | DisGenet |

|    |                                                   |           |  |          |          |
|----|---------------------------------------------------|-----------|--|----------|----------|
| 54 | Alkaline Ceramidase 2                             | ACER2     |  |          | DisGenet |
| 55 | Acetylcholinesterase (Cartwright Blood Group)     | ACHE      |  | GeneCard |          |
| 56 | Atypical Chemokine Receptor 1 (Duffy Blood Group) | ACKR1     |  | GeneCard | DisGenet |
| 57 | Atypical Chemokine Receptor 2                     | ACKR2     |  | GeneCard |          |
| 58 | Atypical Chemokine Receptor 3                     | ACKR3     |  | GeneCard | DisGenet |
| 59 | Atypical Chemokine Receptor 4                     | ACKR4     |  | GeneCard |          |
| 60 | ATP Citrate Lyase                                 | ACLY      |  |          | DisGenet |
| 61 | Aconitase 2                                       | ACO2      |  | GeneCard |          |
| 62 | Acyl-CoA Thioesterase 7                           | ACOT7     |  |          | DisGenet |
| 63 | Acid Phosphatase 1                                | ACP1      |  | GeneCard | DisGenet |
| 64 | Acid phosphatase 3                                | ACP3      |  |          | DisGenet |
| 65 | Acid Phosphatase 5, Tartrate Resistant            | ACP5      |  | GeneCard | DisGenet |
| 66 | Acid Phosphatase 6, Lysophosphatidic              | ACP6      |  | GeneCard |          |
| 67 | Acyl-CoA Synthetase Long Chain Family Member 1    | ACSL1     |  | GeneCard | DisGenet |
| 68 | Acyl-CoA Synthetase Long Chain Family Member 3    | ACSL3     |  | GeneCard |          |
| 69 | Acyl-CoA Synthetase Long Chain Family Member 4    | ACSL4     |  | GeneCard |          |
| 70 | Acyl-CoA Synthetase Long Chain Family Member 6    | ACSL6     |  | GeneCard |          |
| 71 | Acyl-CoA Synthetase Medium Chain Family Member 2B | ACSM2B    |  | GeneCard |          |
| 72 | Acyl-CoA Synthetase Short Chain Family Member 2   | ACSS2     |  | GeneCard | DisGenet |
| 73 | Actin Alpha 1, Skeletal Muscle                    | ACTA1     |  | GeneCard |          |
| 74 | Actin Alpha 2, Smooth Muscle                      | ACTA2     |  | GeneCard | DisGenet |
| 75 | ACTA2 Antisense RNA 1                             | ACTA2-AS1 |  | GeneCard |          |
| 76 | Actin Beta                                        | ACTB      |  | GeneCard | DisGenet |
| 77 | Actin Alpha Cardiac Muscle 1                      | ACTC1     |  | GeneCard |          |
| 78 | Actin Gamma 1                                     | ACTG1     |  | GeneCard |          |
| 79 | Actin Gamma 2, Smooth Muscle                      | ACTG2     |  | GeneCard |          |
| 80 | Actinin Alpha 1                                   | ACTN1     |  | GeneCard |          |
| 81 | Actinin Alpha 2                                   | ACTN2     |  | GeneCard |          |
| 82 | Actinin Alpha 4                                   | ACTN4     |  | GeneCard |          |

|     |                                                           |          |      |          |          |
|-----|-----------------------------------------------------------|----------|------|----------|----------|
| 83  | Actin-related protein T1                                  | ACTRT1   |      |          | DisGenet |
| 84  | Activin A Receptor Type 1                                 | ACVR1    |      | GeneCard |          |
| 85  | Activin A Receptor Type 2A                                | ACVR2A   |      | GeneCard |          |
| 86  | Activin A Receptor Like Type 1                            | ACVRL1   |      | GeneCard |          |
| 87  | Aminoacylase 3                                            | ACY3     |      | GeneCard |          |
| 88  | Adenosine Deaminase                                       | ADA      |      | GeneCard | DisGenet |
| 89  | Adenosine Deaminase 2                                     | ADA2     |      | GeneCard |          |
| 90  | ADAM Metallopeptidase Domain 10                           | ADAM10   |      | GeneCard | DisGenet |
| 91  | ADAM Metallopeptidase Domain 12                           | ADAM12   |      | GeneCard | DisGenet |
| 92  | ADAM metallopeptidase domain 15                           | ADAM15   | OMIM | GeneCard | DisGenet |
| 93  | ADAM Metallopeptidase Domain 17                           | ADAM17   |      | GeneCard | DisGenet |
| 94  | ADAM Metallopeptidase Domain 19                           | ADAM19   |      | GeneCard |          |
| 95  | ADAM Metallopeptidase Domain 2                            | ADAM2    |      | GeneCard |          |
| 96  | ADAM Metallopeptidase Domain 28                           | ADAM28   |      | GeneCard |          |
| 97  | ADAM Metallopeptidase Domain 33                           | ADAM33   |      | GeneCard | DisGenet |
| 98  | ADAM Metallopeptidase Domain 3B (Pseudogene)              | ADAM3B   |      | GeneCard |          |
| 99  | ADAM Metallopeptidase Domain 8                            | ADAM8    |      | GeneCard | DisGenet |
| 100 | ADAM Metallopeptidase Domain 9                            | ADAM9    |      | GeneCard | DisGenet |
| 101 | ADAM Metallopeptidase with Thrombospondin Type 1 Motif 1  | ADAMTS1  |      | GeneCard | DisGenet |
| 102 | ADAM Metallopeptidase with Thrombospondin Type 1 Motif 10 | ADAMTS10 |      | GeneCard |          |
| 103 | ADAM Metallopeptidase with Thrombospondin Type 1 Motif 12 | ADAMTS12 |      | GeneCard |          |
| 104 | ADAM Metallopeptidase with Thrombospondin Type 1 Motif 13 | ADAMTS13 |      | GeneCard | DisGenet |
| 105 | ADAM Metallopeptidase with Thrombospondin Type 1 Motif 14 | ADAMTS14 |      | GeneCard |          |
| 106 | ADAM Metallopeptidase with Thrombospondin Type 1 Motif 17 | ADAMTS17 |      | GeneCard |          |
| 107 | ADAM Metallopeptidase with Thrombospondin Type 1 Motif 18 | ADAMTS18 |      | GeneCard | DisGenet |
| 108 | ADAM Metallopeptidase with Thrombospondin Type 1 Motif 19 | ADAMTS19 |      | GeneCard |          |
| 109 | ADAM Metallopeptidase with Thrombospondin Type 1 Motif 3  | ADAMTS3  |      | GeneCard | DisGenet |
| 110 | ADAM Metallopeptidase with Thrombospondin Type 1 Motif 4  | ADAMTS4  |      | GeneCard | DisGenet |
| 111 | ADAM Metallopeptidase with Thrombospondin Type 1 Motif 5  | ADAMTS5  |      | GeneCard | DisGenet |

|     |                                                             |            |      |          |          |
|-----|-------------------------------------------------------------|------------|------|----------|----------|
| 112 | ADAM Metallopeptidase with Thrombospondin Type 1 Motif 6    | ADAMTS6    |      | GeneCard |          |
| 113 | ADAM Metallopeptidase with Thrombospondin Type 1 Motif 7    | ADAMTS7    |      | GeneCard | DisGenet |
| 114 | ADAM Metallopeptidase with Thrombospondin Type 1 Motif 8    | ADAMTS8    |      | GeneCard |          |
| 115 | ADAM Metallopeptidase with Thrombospondin Type 1 Motif 9    | ADAMTS9    |      | GeneCard |          |
| 116 | ADAMTS Like 1                                               | ADAMTSL1   |      | GeneCard |          |
| 117 | ADAMTS Like 2                                               | ADAMTSL2   |      | GeneCard |          |
| 118 | ADAMTS Like 4                                               | ADAMTSL4   |      | GeneCard |          |
| 119 | Adenosine Deaminase RNA Specific                            | ADAR       |      | GeneCard |          |
| 120 | Adenosine Deaminase RNA Specific B2 (Inactive)              | ADARB2     |      | GeneCard |          |
| 121 | Adenylate Cyclase 1                                         | ADCY1      |      | GeneCard |          |
| 122 | Adenylate Cyclase 10                                        | ADCY10     |      | GeneCard | DisGenet |
| 123 | Adenylate Cyclase 8                                         | ADCY8      |      |          | DisGenet |
| 124 | Adenylate Cyclase 9                                         | ADCY9      |      | GeneCard | DisGenet |
| 125 | Adenylate Cyclase Activating Polypeptide 1                  | ADCYAP1    |      | GeneCard | DisGenet |
| 126 | Adducin 1                                                   | ADD1       |      | GeneCard | DisGenet |
| 127 | Adhesion G protein-Coupled Receptor A2                      | ADGRA2     |      |          | DisGenet |
| 128 | Adhesion G Protein-Coupled Receptor E1                      | ADGRE1     |      | GeneCard |          |
| 129 | Adhesion G Protein-Coupled Receptor E2                      | ADGRE2     |      | GeneCard |          |
| 130 | Adhesion G Protein-Coupled Receptor E3                      | ADGRE3     |      | GeneCard |          |
| 131 | Adhesion G Protein-Coupled Receptor E5                      | ADGRE5     |      | GeneCard |          |
| 132 | Adhesion G Protein-Coupled Receptor G6                      | ADGRG6     |      | GeneCard |          |
| 133 | Adhesion G Protein-Coupled Receptor L2                      | ADGRL2     |      | GeneCard |          |
| 134 | Alcohol Dehydrogenase 1B (Class I), Beta Polypeptide        | ADH1B      |      | GeneCard |          |
| 135 | Alcohol Dehydrogenase 1C (Class I), Gamma Polypeptide       | ADH1C      |      | GeneCard |          |
| 136 | Alcohol Dehydrogenase 4 (Class II), Pi Polypeptide          | ADH4       |      | GeneCard |          |
| 137 | Alcohol Dehydrogenase 5 (class III), Chi polypeptide        | ADH5       |      |          | DisGenet |
| 138 | Alcohol Dehydrogenase 7 (Class IV), Mu or Sigma Polypeptide | ADH7       |      | GeneCard |          |
| 139 | Adipocyte-, C1q-, and collagen domain-containing            | ADIPOQ     | OMIM | GeneCard | DisGenet |
| 140 | ADIPOQ Antisense RNA 1                                      | ADIPOQ-AS1 |      | GeneCard |          |

|     |                                                           |         |      |          |          |
|-----|-----------------------------------------------------------|---------|------|----------|----------|
| 141 | Adiponectin Receptor 1                                    | ADIPOR1 |      | GeneCard | DisGenet |
| 142 | Adiponectin Receptor 2                                    | ADIPOR2 |      | GeneCard | DisGenet |
| 143 | Adenosine Kinase                                          | ADK     |      |          | DisGenet |
| 144 | Adrenomedullin                                            | ADM     |      | GeneCard | DisGenet |
| 145 | Adrenomedullin 2                                          | ADM2    |      | GeneCard |          |
| 146 | Adenosine A1 Receptor                                     | ADORA1  |      | GeneCard |          |
| 147 | Adenosine A2a Receptor                                    | ADORA2A |      | GeneCard |          |
| 148 | Adenosine A2b Receptor                                    | ADORA2B |      | GeneCard |          |
| 149 | ADP-Ribosylarginine Hydrolase                             | ADPRH   |      | GeneCard |          |
| 150 | Adrenoceptor Alpha 1A                                     | ADRA1A  |      |          | DisGenet |
| 151 | Adrenoceptor Alpha 1B                                     | ADRA1B  | OMIM | GeneCard |          |
| 152 | Adrenoceptor Alpha 1D                                     | ADRA1D  |      | GeneCard |          |
| 153 | Adrenoceptor Alpha 2A                                     | ADRA2A  |      | GeneCard |          |
| 154 | Adrenoceptor Alpha 2B                                     | ADRA2B  |      | GeneCard | DisGenet |
| 155 | Adrenoceptor Alpha 2C                                     | ADRA2C  |      | GeneCard |          |
| 156 | Adrenoceptor Beta 1                                       | ADRB1   |      | GeneCard |          |
| 157 | Adrenoceptor Beta 2                                       | ADRB2   |      | GeneCard | DisGenet |
| 158 | Adrenoceptor Beta 3                                       | ADRB3   |      | GeneCard | DisGenet |
| 159 | Adenylosuccinate Lyase                                    | ADSL    |      | GeneCard |          |
| 160 | Androgen Dependent TFPI Regulating Protein                | ADTRP   |      | GeneCard | DisGenet |
| 161 | AE Binding Protein 1                                      | AEBP1   |      | GeneCard |          |
| 162 | Afadin, Adherens Junction Formation Factor                | AFDN    |      | GeneCard |          |
| 163 | AF4/FMR2 Family Member 2                                  | AFF2    |      | GeneCard |          |
| 164 | AF4/FMR2 Family Member 3                                  | AFF3    |      | GeneCard |          |
| 165 | Alpha Fetoprotein                                         | AFP     |      | GeneCard |          |
| 166 | ArfGAP With GTPase Domain, Ankyrin Repeat and PH Domain 3 | AGAP3   |      | GeneCard |          |
| 167 | AGBL Carboxypeptidase 1                                   | AGBL1   |      | GeneCard |          |
| 168 | Advanced Glycosylation End-Product Specific Receptor      | AGER    |      | GeneCard | DisGenet |
| 169 | Angiogenic Factor With G-Patch and FHA Domains 1          | AGGF1   |      | GeneCard |          |

|     |                                                                         |        |      |          |          |
|-----|-------------------------------------------------------------------------|--------|------|----------|----------|
| 170 | Acylglycerol Kinase                                                     | AGK    |      | GeneCard |          |
| 171 | Amylo-Alpha-1, 6-Glucosidase, 4-Alpha-Glucanotransferase                | AGL    |      | GeneCard |          |
| 172 | 1-Acylglycerol-3-Phosphate O-Acyltransferase 1                          | AGPAT1 |      | GeneCard |          |
| 173 | 1-Acylglycerol-3-Phosphate O-Acyltransferase 2                          | AGPAT2 |      | GeneCard | DisGenet |
| 174 | Agouti related neuropeptide                                             | AGRP   |      |          | DisGenet |
| 175 | Angiotensinogen                                                         | AGT    |      | GeneCard | DisGenet |
| 176 | Angiotensin Receptor 1                                                  | AGTR1  | OMIM | GeneCard | DisGenet |
| 177 | Angiotensin II Receptor Type 2                                          | AGTR2  |      | GeneCard | DisGenet |
| 178 | Angiotensin II Receptor Associated Protein                              | AGTRAP |      | GeneCard |          |
| 179 | Alanine-Glyoxylate and Serine-Pyruvate Aminotransferase                 | AGXT   |      | GeneCard | DisGenet |
| 180 | Alanine-Glyoxylate Aminotransferase 2                                   | AGXT2  |      | GeneCard | DisGenet |
| 181 | Adenosylhomocysteinase                                                  | AHCY   |      | GeneCard | DisGenet |
| 182 | Aryl Hydrocarbon Receptor                                               | AHR    |      | GeneCard | DisGenet |
| 183 | Aryl Hydrocarbon Receptor Repressor                                     | AHRR   |      | GeneCard | DisGenet |
| 184 | Activator of HSP90 ATPase Activity 1                                    | AHSA1  |      |          | DisGenet |
| 185 | Alpha-2HS-glycoprotein                                                  | AHSG   | OMIM | GeneCard | DisGenet |
| 186 | Alpha Hemoglobin Stabilizing Protein                                    | AHSP   |      | GeneCard |          |
| 187 | Axin Interactor, Dorsalization Associated                               | AIDA   |      | GeneCard |          |
| 188 | Allograft Inflammatory Factor 1                                         | AIF1   |      | GeneCard | DisGenet |
| 189 | Apoptosis Inducing Factor Mitochondria Associated 1                     | AIFM1  |      | GeneCard |          |
| 190 | Absent In Melanoma 2                                                    | AIM2   |      | GeneCard | DisGenet |
| 191 | Aminoacyl tRNA Synthetase Complex Interacting Multifunctional Protein 1 | AIMP1  |      | GeneCard | DisGenet |
| 192 | Aminoacyl tRNA Synthetase Complex Interacting Multifunctional Protein 2 | AIMP2  |      |          | DisGenet |
| 193 | Aryl Hydrocarbon Receptor Interacting Protein Like 1                    | AIPL1  |      | GeneCard |          |
| 194 | Autoimmune Regulator                                                    | AIRE   |      | GeneCard |          |
| 195 | A-Kinase Anchoring Protein 12                                           | AKAP12 |      | GeneCard | DisGenet |
| 196 | A-Kinase Anchoring Protein 7                                            | AKAP7  |      | GeneCard |          |
| 197 | A-Kinase Anchoring Protein 9                                            | AKAP9  |      | GeneCard |          |
| 198 | AKNA Domain Containing 1                                                | AKNAD1 |      | GeneCard |          |



|     |                                                      |         |      |          |          |
|-----|------------------------------------------------------|---------|------|----------|----------|
| 199 | Aldo-Keto Reductase Family 1 Member A1               | AKR1A1  |      | GeneCard |          |
| 200 | Aldo-Keto Reductase Family 1 Member B                | AKR1B1  |      | GeneCard | DisGenet |
| 201 | Aldo-Keto Reductase Family 1 Member B10              | AKR1B10 |      | GeneCard | DisGenet |
| 202 | Aldo-Keto Reductase Family 1 Member C4               | AKR1C4  |      | GeneCard |          |
| 203 | AKT Serine/Threonine Kinase 1                        | AKT1    |      | GeneCard | DisGenet |
| 204 | AKT1 Substrate 1                                     | AKT1S1  |      | GeneCard | DisGenet |
| 205 | AKT Serine/Threonine Kinase 2                        | AKT2    |      | GeneCard | DisGenet |
| 206 | AKT Serine/Threonine Kinase 3                        | AKT3    |      | GeneCard | DisGenet |
| 207 | Albumin                                              | ALB     | OMIM | GeneCard | DisGenet |
| 208 | Activated Leukocyte Cell Adhesion Molecule           | ALCAM   |      | GeneCard | DisGenet |
| 209 | Aldehyde Dehydrogenase 2 Family Member               | ALDH2   |      | GeneCard | DisGenet |
| 210 | Aldehyde Dehydrogenase 4 Family Member A1            | ALDH4A1 |      | GeneCard |          |
| 211 | Aldehyde Dehydrogenase 8 Family Member A1            | ALDH8A1 |      | GeneCard |          |
| 212 | Aldehyde Dehydrogenase 9 Family Member A1            | ALDH9A1 |      | GeneCard |          |
| 213 | ALG6 Alpha-1,3-Glucosyltransferase                   | ALG6    |      | GeneCard |          |
| 214 | ALK Receptor Tyrosine Kinase                         | ALK     |      | GeneCard |          |
| 215 | ALKB Homolog 1, Histone H2A Dioxygenase              | ALKBH1  |      |          | DisGenet |
| 216 | ALMS1 centrosome and basal body associated protein   | ALMS1   | OMIM | GeneCard | DisGenet |
| 217 | ALMS1 Pseudogene 1                                   | ALMS1P1 |      | GeneCard |          |
| 218 | Arachidonate 12-Lipoxygenase, 12S Type               | ALOX12  |      | GeneCard | DisGenet |
| 219 | Arachidonate 15-Lipoxygenase                         | ALOX15  |      | GeneCard | DisGenet |
| 220 | Arachidonate 15-Lipoxygenase Type B                  | ALOX15B |      | GeneCard | DisGenet |
| 221 | Arachidonate 5-Lipoxygenase                          | ALOX5   | OMIM | GeneCard | DisGenet |
| 222 | Arachidonate 5-Lipoxygenase-Activating Protein       | ALOX5AP | OMIM | GeneCard | DisGenet |
| 223 | Alpha Kinase 3                                       | ALPK3   |      | GeneCard |          |
| 224 | Alkaline Phosphatase, Biom mineralization Associated | ALPL    |      | GeneCard | DisGenet |
| 225 | Alkaline Phosphatase, Placental                      | ALPP    |      | GeneCard |          |
| 226 | Aly/REF Export Factor                                | ALYREF  |      | GeneCard |          |
| 227 | Alpha-1-Microglobulin/Bikunin Precursor              | AMBP    |      | GeneCard |          |

|     |                                                             |          |      |          |          |
|-----|-------------------------------------------------------------|----------|------|----------|----------|
| 228 | Autocrine Motility Factor Receptor                          | AMFR     |      | GeneCard |          |
| 229 | Anti-Mullerian Hormone                                      | AMH      |      | GeneCard | DisGenet |
| 230 | Anti-Mullerian Hormone Receptor Type 2                      | AMHR2    |      | GeneCard |          |
| 231 | Amnion Associated Transmembrane Protein                     | AMN      |      | GeneCard |          |
| 232 | Angiomotin                                                  | AMOT     |      | GeneCard | DisGenet |
| 233 | Adenosine Monophosphate Deaminase 1                         | AMPD1    |      | GeneCard |          |
| 234 | Adenosine Monophosphate Deaminase 2                         | AMPD2    |      | GeneCard |          |
| 235 | Anaphase Promoting Complex Subunit 16                       | ANAPC16  |      | GeneCard |          |
| 236 | Angiogenin                                                  | ANG      |      | GeneCard |          |
| 237 | Angiopoietin 1                                              | ANGPT1   |      | GeneCard | DisGenet |
| 238 | Angiopoietin 2                                              | ANGPT2   |      | GeneCard | DisGenet |
| 239 | Angiopoietin Like 1                                         | ANGPTL1  |      | GeneCard |          |
| 240 | Angiopoietin Like 2                                         | ANGPTL2  |      | GeneCard | DisGenet |
| 241 | Angiopoietin Like 3                                         | ANGPTL3  | OMIM | GeneCard | DisGenet |
| 242 | Angiopoietin Like 4                                         | ANGPTL4  |      | GeneCard | DisGenet |
| 243 | Angiopoietin Like 5                                         | ANGPTL5  |      | GeneCard |          |
| 244 | Angiopoietin Like 6                                         | ANGPTL6  |      | GeneCard | DisGenet |
| 245 | Angiopoietin Like 7                                         | ANGPTL7  |      | GeneCard |          |
| 246 | Angiopoietin Like 8                                         | ANGPTL8  |      | GeneCard | DisGenet |
| 247 | Ankyrin 1                                                   | ANK1     |      | GeneCard |          |
| 248 | Ankyrin 2                                                   | ANK2     |      | GeneCard |          |
| 249 | Ankyrin 3                                                   | ANK3     |      | GeneCard |          |
| 250 | ANKH Inorganic Pyrophosphate Transport Regulator            | ANKH     |      | GeneCard |          |
| 251 | Ankyrin Repeat Domain-Containing Protein 1                  | ANKRD1   | OMIM | GeneCard |          |
| 252 | Ankyrin Repeat Domain 2                                     | ANKRD2   |      | GeneCard |          |
| 253 | Ankyrin Repeat Domain 23                                    | ANKRD23  |      | GeneCard |          |
| 254 | Ankyrin Repeat Domain 30A                                   | ANKRD30A |      | GeneCard |          |
| 255 | Ankyrin Repeat Domain 6                                     | ANKRD6   |      | GeneCard |          |
| 256 | Ankyrin Repeat and Sterile Alpha Motif Domain Containing 1B | ANKS1B   |      |          | DisGenet |

|     |                                                          |           |  |          |          |
|-----|----------------------------------------------------------|-----------|--|----------|----------|
| 257 | Anillin, Actin Binding Protein                           | ANLN      |  | GeneCard |          |
| 258 | Anoctamin 5                                              | ANO5      |  | GeneCard |          |
| 259 | Anoctamin 6                                              | ANO6      |  | GeneCard |          |
| 260 | Alanyl Aminopeptidase, Membrane                          | ANPEP     |  | GeneCard | DisGenet |
| 261 | ANTXR Cell Adhesion Molecule 1                           | ANTXR1    |  | GeneCard | DisGenet |
| 262 | ANTXR Cell Adhesion Molecule 2                           | ANTXR2    |  | GeneCard |          |
| 263 | Annexin A1                                               | ANXA1     |  | GeneCard | DisGenet |
| 264 | Annexin A10                                              | ANXA10    |  | GeneCard |          |
| 265 | Annexin A2                                               | ANXA2     |  | GeneCard | DisGenet |
| 266 | Annexin A5                                               | ANXA5     |  | GeneCard | DisGenet |
| 267 | Annexin A6                                               | ANXA6     |  | GeneCard |          |
| 268 | Amine Oxidase Copper Containing 1                        | AOC1      |  | GeneCard |          |
| 269 | Amine Oxidase Copper Containing 2                        | AOC2      |  |          | DisGenet |
| 270 | Amine Oxidase Copper Containing 3                        | AOC3      |  | GeneCard | DisGenet |
| 271 | Adaptor Related Protein Complex 1 Subunit Beta 1         | AP1B1     |  | GeneCard |          |
| 272 | Adaptor Related Protein Complex 2 Subunit Alpha 1        | AP2A1     |  |          | DisGenet |
| 273 | Adaptor Related Protein Complex 2 Subunit Beta 1         | AP2B1     |  | GeneCard |          |
| 274 | Adaptor Related Protein Complex 3 Subunit Beta 1         | AP3B1     |  | GeneCard |          |
| 275 | Adaptor Related Protein Complex 3 Subunit Delta 1        | AP3D1     |  | GeneCard |          |
| 276 | Adaptor Related Protein Complex 3 Subunit Sigma 2        | AP3S2     |  | GeneCard |          |
| 277 | AP4B1 Antisense RNA 1                                    | AP4B1-AS1 |  | GeneCard |          |
| 278 | Amyloid Beta Precursor Protein Binding Family B Member 1 | APBB1     |  | GeneCard |          |
| 279 | Amyloid Beta Precursor Protein Binding Family B Member 2 | APBB2     |  | GeneCard |          |
| 280 | APC Regulator of WNT Signaling Pathway                   | APC       |  | GeneCard | DisGenet |
| 281 | APC Down-Regulated 1                                     | APCDD1    |  | GeneCard |          |
| 282 | Amyloid P Component, Serum                               | APCS      |  | GeneCard | DisGenet |
| 283 | Acylaminoacyl-Peptide Hydrolase                          | APEH      |  | GeneCard |          |
| 284 | Apurinic/Apyrimidinic Endodeoxyribonuclease 1            | APEX1     |  | GeneCard | DisGenet |
| 285 | Aph-1 Homolog B, Gamma-Secretase Subunit                 | APH1B     |  | GeneCard |          |

|     |                                                                                  |             |      |          |          |
|-----|----------------------------------------------------------------------------------|-------------|------|----------|----------|
| 286 | Apelin                                                                           | APLN        |      | GeneCard | DisGenet |
| 287 | Apelin Receptor                                                                  | APLNR       |      | GeneCard | DisGenet |
| 288 | Apolipoprotein A-I                                                               | APOA1       | OMIM | GeneCard | DisGenet |
| 289 | APOA1 Antisense RNA                                                              | APOA1-AS    |      | GeneCard | DisGenet |
| 290 | Apolipoprotein A-II                                                              | APOA2       | OMIM | GeneCard | DisGenet |
| 291 | Apolipoprotein A-IV                                                              | APOA4       | OMIM | GeneCard | DisGenet |
| 292 | Apolipoprotein A-V                                                               | APOA5       | OMIM | GeneCard | DisGenet |
| 293 | Apolipoprotein B (including Ag(x) antigen)                                       | APOB        | OMIM | GeneCard | DisGenet |
| 294 | Apolipoprotein B mRNA Editing Enzyme Catalytic Subunit 1                         | APOBEC1     |      | GeneCard | DisGenet |
| 295 | Apolipoprotein B Receptor                                                        | APOBR       |      | GeneCard | DisGenet |
| 296 | Apolipoprotein C1                                                                | APOC1       |      | GeneCard | DisGenet |
| 297 | Apolipoprotein C2                                                                | APOC2       |      | GeneCard | DisGenet |
| 298 | Apolipoprotein C-III                                                             | APOC3       | OMIM | GeneCard | DisGenet |
| 299 | Apolipoprotein C4                                                                | APOC4       |      | GeneCard |          |
| 300 | APOC4-APOC2 (NMD Candidate)                                                      | APOC4-APOC2 |      | GeneCard |          |
| 301 | Apolipoprotein D                                                                 | APOD        |      | GeneCard |          |
| 302 | Apolipoprotein E                                                                 | APOE        |      | GeneCard | DisGenet |
| 303 | Apolipoprotein F                                                                 | APOF        |      | GeneCard |          |
| 304 | Apolipoprotein H                                                                 | APOH        |      | GeneCard | DisGenet |
| 305 | Apolipoprotein L1                                                                | APOL1       |      | GeneCard | DisGenet |
| 306 | Apolipoprotein L2                                                                | APOL2       |      | GeneCard |          |
| 307 | Apolipoprotein L3                                                                | APOL3       |      | GeneCard |          |
| 308 | Apolipoprotein L4                                                                | APOL4       |      | GeneCard |          |
| 309 | Apolipoprotein L5                                                                | APOL5       |      | GeneCard |          |
| 310 | Apolipoprotein L6                                                                | APOL6       |      | GeneCard | DisGenet |
| 311 | Apolipoprotein M                                                                 | APOM        | OMIM | GeneCard |          |
| 312 | Apolipoprotein O Pseudogene 1                                                    | APOOP1      |      | GeneCard |          |
| 313 | Amyloid Beta Precursor Protein                                                   | APP         |      | GeneCard | DisGenet |
| 314 | Adaptor Protein, Phosphotyrosine Interacting with PH Domain and Leucine Zipper 1 | APPL1       |      |          | DisGenet |

|     |                                                              |          |  |          |          |
|-----|--------------------------------------------------------------|----------|--|----------|----------|
| 315 | Adenine Phosphoribosyltransferase                            | APRT     |  | GeneCard | DisGenet |
| 316 | Aprataxin                                                    | APTX     |  | GeneCard |          |
| 317 | Aquaporin 1 (Colton Blood Group)                             | AQP1     |  | GeneCard | DisGenet |
| 318 | Aquaporin 7                                                  | AQP7     |  | GeneCard |          |
| 319 | Aquaporin 9                                                  | AQP9     |  | GeneCard |          |
| 320 | Androgen Receptor                                            | AR       |  | GeneCard | DisGenet |
| 321 | ADP Ribosylation Factor 1                                    | ARF1     |  | GeneCard |          |
| 322 | ADP Ribosylation Factor Guanine Nucleotide Exchange Factor 1 | ARFGEF1  |  | GeneCard |          |
| 323 | ADP Ribosylation Factor Guanine Nucleotide Exchange Factor 2 | ARFGEF2  |  | GeneCard |          |
| 324 | Arginase 1                                                   | ARG1     |  | GeneCard | DisGenet |
| 325 | Arginase 2                                                   | ARG2     |  | GeneCard |          |
| 326 | Rho GTPase Activating Protein 18                             | ARHGAP18 |  | GeneCard | DisGenet |
| 327 | Rho GTPase Activating Protein 20                             | ARHGAP20 |  | GeneCard |          |
| 328 | Rho GTPase Activating Protein 24                             | ARHGAP24 |  |          | DisGenet |
| 329 | Rho Guanine Nucleotide Exchange Factor 1                     | ARHGEF1  |  |          | DisGenet |
| 330 | Rho Guanine Nucleotide Exchange Factor 10                    | ARHGEF10 |  | GeneCard |          |
| 331 | Rho/Rac Guanine Nucleotide Exchange Factor 2                 | ARHGEF2  |  |          | DisGenet |
| 332 | Rho Guanine Nucleotide Exchange Factor 26                    | ARHGEF26 |  |          | DisGenet |
| 333 | Rho Guanine Nucleotide Exchange Factor 28                    | ARHGEF28 |  |          | DisGenet |
| 334 | Rho Guanine Nucleotide Exchange Factor 38                    | ARHGEF38 |  | GeneCard |          |
| 335 | Rho Guanine Nucleotide Exchange Factor 5                     | ARHGEF5  |  |          | DisGenet |
| 336 | AT-Rich Interaction Domain 5B                                | ARID5B   |  | GeneCard | DisGenet |
| 337 | Ariadne RBR E3 Ubiquitin Protein Ligase 1                    | ARIH1    |  | GeneCard |          |
| 338 | ADP Ribosylation Factor Like GTPase 13B                      | ARL13B   |  | GeneCard |          |
| 339 | ADP Ribosylation Factor Like GTPase 15                       | ARL15    |  | GeneCard |          |
| 340 | ADP Ribosylation Factor Like GTPase 6                        | ARL6     |  | GeneCard |          |
| 341 | ADP Ribosylation Factor Like GTPase 6 Interacting Protein 1  | ARL6IP1  |  |          | DisGenet |
| 342 | Armadillo Like Helical Domain Containing 1                   | ARMH1    |  |          | DisGenet |
| 343 | Armadillo Like Helical Domain Containing 3                   | ARMH3    |  | GeneCard |          |

|     |                                                     |        |  |          |          |
|-----|-----------------------------------------------------|--------|--|----------|----------|
| 344 | Age-Related Maculopathy Susceptibility 2            | ARMS2  |  | GeneCard |          |
| 345 | Aryl Hydrocarbon Receptor Nuclear Translocator      | ARNT   |  | GeneCard |          |
| 346 | Aryl Hydrocarbon Receptor Nuclear Translocator Like | ARNTL  |  | GeneCard | DisGenet |
| 347 | Actin Related Protein 2/3 Complex Subunit 4         | ARPC4  |  | GeneCard |          |
| 348 | Arrestin 3                                          | ARR3   |  |          | DisGenet |
| 349 | Arrestin Beta 1                                     | ARRB1  |  | GeneCard |          |
| 350 | Arrestin Beta 2                                     | ARRB2  |  | GeneCard |          |
| 351 | Arrestin Domain Containing 4                        | ARRDC4 |  | GeneCard |          |
| 352 | Arylsulfatase A                                     | ARSA   |  | GeneCard |          |
| 353 | Arylsulfatase B                                     | ARSB   |  | GeneCard | DisGenet |
| 354 | Arylsulfatase Family Member H                       | ARSH   |  | GeneCard |          |
| 355 | Arylsulfatase Family Member I                       | ARSI   |  |          | DisGenet |
| 356 | Arylsulfatase L                                     | ARSL   |  |          | DisGenet |
| 357 | Artemin                                             | ARTN   |  |          | DisGenet |
| 358 | Arsenite Methyltransferase                          | AS3MT  |  | GeneCard | DisGenet |
| 359 | N-Acylsphingosine Amidohydrolase 1                  | ASAH1  |  | GeneCard |          |
| 360 | Activating Signal Cointegrator 1 Complex Subunit 3  | ASCC3  |  | GeneCard |          |
| 361 | Asialoglycoprotein Receptor 1                       | ASGR1  |  | GeneCard |          |
| 362 | Asialoglycoprotein Receptor 2                       | ASGR2  |  | GeneCard |          |
| 363 | Aspartoacylase                                      | ASPA   |  | GeneCard |          |
| 364 | Argininosuccinate Synthase 1                        | ASS1   |  | GeneCard | DisGenet |
| 365 | Astrotactin 1                                       | ASTN1  |  | GeneCard |          |
| 366 | ASXL Transcriptional Regulator 1                    | ASXL1  |  | GeneCard |          |
| 367 | ASXL Transcriptional Regulator 2                    | ASXL2  |  | GeneCard |          |
| 368 | Activating Transcription Factor 1                   | ATF1   |  | GeneCard |          |
| 369 | Activating Transcription Factor 2                   | ATF2   |  | GeneCard | DisGenet |
| 370 | Activating Transcription Factor 3                   | ATF3   |  | GeneCard |          |
| 371 | Activating Transcription Factor 4                   | ATF4   |  | GeneCard | DisGenet |
| 372 | Activating Transcription Factor 6                   | ATF6   |  | GeneCard |          |

|     |                                                                                    |                 |      |          |          |
|-----|------------------------------------------------------------------------------------|-----------------|------|----------|----------|
| 373 | Autophagy Related 13                                                               | ATG13           |      |          | DisGenet |
| 374 | Autophagy Related 16 Like 1                                                        | ATG16L1         |      | GeneCard | DisGenet |
| 375 | Autophagy Related 5                                                                | ATG5            |      | GeneCard | DisGenet |
| 376 | Autophagy Related 7                                                                | ATG7            |      | GeneCard | DisGenet |
| 377 | Autophagy Related 9B                                                               | ATG9B           |      | GeneCard |          |
| 378 | Atherosclerosis Susceptibility (Lipoprotein Associated)                            | ATHS            |      | GeneCard |          |
| 379 | 5-Aminoimidazole-4-Carboxamide Ribonucleotide Formyltransferase/IMP Cyclohydrolase | ATIC            |      | GeneCard | DisGenet |
| 380 | ATM serine/threonine kinase                                                        | ATM             | OMIM | GeneCard | DisGenet |
| 381 | Atrophin 1                                                                         | ATN1            |      | GeneCard | DisGenet |
| 382 | Atonal bHLH Transcription Factor 1                                                 | ATOH1           |      |          | DisGenet |
| 383 | Antioxidant 1 Copper Chaperone                                                     | ATOX1           |      | GeneCard | DisGenet |
| 384 | ATPase Phospholipid Transporting 10A (Putative)                                    | ATP10A          |      | GeneCard |          |
| 385 | ATPase Phospholipid Transporting 10D (Putative)                                    | ATP10D          |      | GeneCard |          |
| 386 | ATPase Cation Transporting 13A2                                                    | ATP13A2         |      | GeneCard |          |
| 387 | ATPase Na+/K+ Transporting Subunit Alpha 1                                         | ATP1A1          |      | GeneCard |          |
| 388 | ATPase Sarcoplasmic/Endoplasmic Reticulum Ca2+ Transporting 2                      | ATP2A2          |      | GeneCard |          |
| 389 | ATPase Plasma Membrane Ca2+ Transporting 1                                         | ATP2B1          |      | GeneCard | DisGenet |
| 390 | ATP Synthase F1 Subunit Alpha                                                      | ATP5F1A         |      | GeneCard |          |
| 391 | ATP Synthase F1 Subunit Beta                                                       | ATP5F1B         |      | GeneCard |          |
| 392 | ATP Synthase Inhibitory Factor Subunit 1                                           | ATP5IF1         |      | GeneCard |          |
| 393 | ATP Synthase Membrane Subunit K                                                    | ATP5MK          |      | GeneCard |          |
| 394 | ATP Synthase Peripheral Stalk Subunit F6                                           | ATP5PF          |      | GeneCard |          |
| 395 | ATPase H+ Transporting Accessory Protein 2                                         | ATP6AP2         |      | GeneCard |          |
| 396 | ATPase H+ Transporting V0 Subunit A2                                               | ATP6V0A2        |      | GeneCard | DisGenet |
| 397 | ATPase H+ Transporting V1 Subunit C2                                               | ATP6V1C2        |      | GeneCard |          |
| 398 | ATPase H+ Transporting V1 Subunit E1                                               | ATP6V1E1        |      | GeneCard |          |
| 399 | ATPase H+ Transporting V1 Subunit G2                                               | ATP6V1G2        |      | GeneCard |          |
| 400 | ATP6V1G2-DDX39B Readthrough (NMD Candidate)                                        | ATP6V1G2-DDX39B |      | GeneCard |          |

|     |                                                    |             |      |          |          |
|-----|----------------------------------------------------|-------------|------|----------|----------|
| 401 | ATPase Copper Transporting Alpha                   | ATP7A       |      | GeneCard | DisGenet |
| 402 | ATPase Phospholipid Transporting 8B1               | ATP8B1      |      | GeneCard |          |
| 403 | ATR Serine/Threonine Kinase                        | ATR         |      | GeneCard |          |
| 404 | ATR Interacting Protein                            | ATRIP       |      | GeneCard |          |
| 405 | ATRIP-TREX1 Readthrough                            | ATRIP-TREX1 |      | GeneCard |          |
| 406 | Ataxin 1                                           | ATXN1       |      | GeneCard |          |
| 407 | Ataxin 2                                           | ATXN2       |      | GeneCard |          |
| 408 | Ataxin 3                                           | ATXN3       |      | GeneCard |          |
| 409 | Aurora Kinase A and Ninein Interacting Protein     | AUNIP       |      |          | DisGenet |
| 410 | Aurora Kinase A                                    | AURKA       |      | GeneCard | DisGenet |
| 411 | Arginine Vasopressin                               | AVP         |      | GeneCard |          |
| 412 | Acyl-CoA Wax Alcohol Acyltransferase 1             | AWAT1       |      | GeneCard |          |
| 413 | Acyl-CoA Wax Alcohol Acyltransferase 2             | AWAT2       |      | GeneCard |          |
| 414 | AXL Receptor Tyrosine Kinase                       | AXL         |      | GeneCard |          |
| 415 | Alpha-2-Glycoprotein 1, Zinc-Binding               | AZGP1       |      | GeneCard | DisGenet |
| 416 | Azurocidin 1                                       | AZU1        |      | GeneCard | DisGenet |
| 417 | Beta-2-Microglobulin                               | B2M         |      | GeneCard | DisGenet |
| 418 | Beta-1,3-Galactosyltransferase 4                   | B3GALT4     |      | GeneCard |          |
| 419 | Beta-1,4-N-Acetyl-Galactosaminyltransferase 3      | B4GALNT3    |      | GeneCard |          |
| 420 | Beta-1,4-Galactosyltransferase 1                   | B4GALT1     |      | GeneCard |          |
| 421 | Beta-1,4-Galactosyltransferase 6                   | B4GALT6     |      | GeneCard |          |
| 422 | Beta-Secretase 1                                   | BACE1       |      | GeneCard | DisGenet |
| 423 | BTB Domain and CNC Homolog 1                       | BACH1       |      | GeneCard |          |
| 424 | BCL2 Associated Agonist of Cell Death              | BAD         |      | GeneCard |          |
| 425 | BAG Cochaperone 3                                  | BAG3        |      | GeneCard |          |
| 426 | BAR/IMD Domain Containing Adaptor Protein 2 Like 1 | BAIAP2L1    |      | GeneCard |          |
| 427 | BCL2 Antagonist/Killer 1                           | BAK1        |      | GeneCard |          |
| 428 | BMP and Activin Membrane Bound Inhibitor           | BAMBI       |      |          | DisGenet |
| 429 | BRAF-ctivated Noncoding RNA                        | BANCR       | OMIM |          |          |



|     |                                                      |         |      |          |          |
|-----|------------------------------------------------------|---------|------|----------|----------|
| 430 | Barrier to Autointegration Factor 1                  | BANF1   | OMIM | GeneCard | DisGenet |
| 431 | B Cell Scaffold Protein with Ankyrin Repeats 1       | BANK1   |      | GeneCard |          |
| 432 | BarH Like Homeobox 2                                 | BARHL2  |      | GeneCard |          |
| 433 | Basic leucine zipper ATF-like transcription factor 3 | BATF3   |      |          | DisGenet |
| 434 | BCL2 Associated X, Apoptosis Regulator               | BAX     |      | GeneCard | DisGenet |
| 435 | Bromodomain Adjacent to Zinc Finger Domain 1A        | BAZ1A   |      | GeneCard |          |
| 436 | Bromodomain Adjacent to Zinc Finger Domain 1B        | BAZ1B   |      | GeneCard |          |
| 437 | Bromodomain Adjacent to Zinc Finger Domain 2B        | BAZ2B   |      | GeneCard |          |
| 438 | Bardet-Biedl Syndrome 1                              | BBS1    |      | GeneCard |          |
| 439 | Bardet-Biedl Syndrome 10                             | BBS10   |      | GeneCard |          |
| 440 | Bardet-Biedl Syndrome 2                              | BBS2    |      | GeneCard |          |
| 441 | Bardet-Biedl Syndrome 4                              | BBS4    |      | GeneCard |          |
| 442 | Bardet-Biedl Syndrome 5                              | BBS5    |      | GeneCard |          |
| 443 | Bardet-Biedl Syndrome 7                              | BBS7    |      | GeneCard |          |
| 444 | Bardet-Biedl Syndrome 9                              | BBS9    |      | GeneCard |          |
| 445 | Basal Cell Adhesion Molecule (Lutheran Blood Group)  | BCAM    |      | GeneCard |          |
| 446 | BCAR1 Scaffold Protein, Cas Family Member            | BCAR1   |      | GeneCard |          |
| 447 | BCAR3 Adaptor Protein, NSP Family Member             | BCAR3   |      | GeneCard |          |
| 448 | Breast Cancer Anti-Estrogen Resistance 4             | BCAR4   |      | GeneCard |          |
| 449 | Butyrylcholinesterase                                | BCHE    |      | GeneCard |          |
| 450 | BCL2 Apoptosis Regulator                             | BCL2    |      | GeneCard | DisGenet |
| 451 | BCL2 Related Protein A1                              | BCL2A1  |      | GeneCard |          |
| 452 | BCL2 Like 1                                          | BCL2L1  |      | GeneCard |          |
| 453 | BCL2 Like 11                                         | BCL2L11 |      | GeneCard |          |
| 454 | BCL3 Transcription Coactivator                       | BCL3    |      | GeneCard | DisGenet |
| 455 | BCL6 Transcription Repressor                         | BCL6    |      | GeneCard |          |
| 456 | Beta-Carotene Oxygenase 1                            | BCO1    |      | GeneCard |          |
| 457 | BCL6 Corepressor                                     | BCOR    |      | GeneCard |          |
| 458 | BCR activator of RhoGEF and GTPase                   | BCR     |      |          | DisGenet |

|     |                                                |                |  |          |          |
|-----|------------------------------------------------|----------------|--|----------|----------|
| 459 | Bradykinin Receptor B1                         | BDKRB1         |  | GeneCard |          |
| 460 | Bradykinin Receptor B2                         | BDKRB2         |  | GeneCard | DisGenet |
| 461 | Brain Derived Neurotrophic Factor              | BDNF           |  | GeneCard | DisGenet |
| 462 | Beclin 1                                       | BECN1          |  | GeneCard | DisGenet |
| 463 | Bestrophin 1                                   | BEST1          |  |          | DisGenet |
| 464 | Bestrophin 3                                   | BEST3          |  | GeneCard |          |
| 465 | Beaded Filament Structural Protein 1           | BFSP1          |  | GeneCard |          |
| 466 | Bone Gamma-Carboxyglutamate Protein            | BGLAP          |  | GeneCard | DisGenet |
| 467 | Biglycan                                       | BGN            |  | GeneCard | DisGenet |
| 468 | Basic Helix-Loop-Helix Family Member E22       | BHLHE22        |  |          | DisGenet |
| 469 | Betaine--Homocysteine S-Methyltransferase      | BHMT           |  | GeneCard |          |
| 470 | Betaine--Homocysteine S-Methyltransferase 2    | BHMT2          |  | GeneCard |          |
| 471 | BH3 Interacting Domain Death Agonist           | BID            |  | GeneCard |          |
| 472 | BCL2 Interacting Killer                        | BIK            |  |          | DisGenet |
| 473 | Baculoviral IAP Repeat Containing 3            | BIRC3          |  | GeneCard | DisGenet |
| 474 | Baculoviral IAP Repeat Containing 5            | BIRC5          |  | GeneCard |          |
| 475 | BLK Proto-Oncogene, Src Family Tyrosine Kinase | BLK            |  | GeneCard |          |
| 476 | BLM RecQ Like Helicase                         | BLM            |  | GeneCard | DisGenet |
| 477 | BLOC1S5-TXNDC5 Readthrough (NMD Candidate)     | BLOC1S5-TXNDC5 |  | GeneCard |          |
| 478 | Biliverdin Reductase A                         | BLVRA          |  | GeneCard |          |
| 479 | Biliverdin Reductase B                         | BLVRB          |  | GeneCard |          |
| 480 | Bone Morphogenetic Protein 1                   | BMP1           |  | GeneCard |          |
| 481 | Bone Morphogenetic Protein 15                  | BMP15          |  | GeneCard |          |
| 482 | Bone Morphogenetic Protein 2                   | BMP2           |  | GeneCard | DisGenet |
| 483 | Bone Morphogenetic Protein 3                   | BMP3           |  | GeneCard |          |
| 484 | Bone Morphogenetic Protein 4                   | BMP4           |  | GeneCard | DisGenet |
| 485 | Bone Morphogenetic Protein 5                   | BMP5           |  | GeneCard |          |
| 486 | Bone Morphogenetic Protein 6                   | BMP6           |  | GeneCard |          |

|     |                                                                 |         |  |          |          |
|-----|-----------------------------------------------------------------|---------|--|----------|----------|
| 487 | Bone Morphogenetic Protein 7                                    | BMP7    |  | GeneCard | DisGenet |
| 488 | BMP Binding Endothelial Regulator                               | BMPER   |  | GeneCard |          |
| 489 | Bone Morphogenetic Protein Receptor Type 1B                     | BMPR1B  |  | GeneCard |          |
| 490 | Bone Morphogenetic Protein Receptor Type 2                      | BMPR2   |  | GeneCard |          |
| 491 | BMS1 ribosome biogenesis factor                                 | BMS1    |  |          | DisGenet |
| 492 | Basonuclin 1                                                    | BNC1    |  | GeneCard |          |
| 493 | Basonuclin 2                                                    | BNC2    |  | GeneCard |          |
| 494 | BCL2 Interacting Protein 3                                      | BNIP3   |  | GeneCard |          |
| 495 | BOP1 Ribosomal Biogenesis Factor                                | BOP1    |  | GeneCard |          |
| 496 | Bactericidal Permeability Increasing Protein                    | BPI     |  | GeneCard |          |
| 497 | BPI Fold Containing Family B Member 4                           | BPIFB4  |  | GeneCard | DisGenet |
| 498 | BRCA1 Associated Protein                                        | BRAP    |  | GeneCard | DisGenet |
| 499 | BRCA1 DNA Repair Associated                                     | BRCA1   |  | GeneCard | DisGenet |
| 500 | BRCA2 DNA Repair Associated                                     | BRCA2   |  | GeneCard |          |
| 501 | BRCA1/BRCA2-Containing Complex Subunit 3                        | BRCC3   |  | GeneCard |          |
| 502 | Bromodomain containing 7                                        | BRD7    |  |          | DisGenet |
| 503 | Bromodomain containing 8                                        | BRD8    |  |          | DisGenet |
| 504 | Bromodomain Testis Associated                                   | BRDT    |  | GeneCard |          |
| 505 | BRF2 RNA Polymerase III Transcription Initiation Factor Subunit | BRF2    |  | GeneCard |          |
| 506 | BMP/Retinoic Acid Inducible Neural Specific 1                   | BRINP1  |  |          | DisGenet |
| 507 | BMP/Retinoic Acid Inducible Neural Specific 3                   | BRINP3  |  | GeneCard | DisGenet |
| 508 | Bromodomain and PHD Finger Containing 3                         | BRPF3   |  | GeneCard |          |
| 509 | Bombesin Receptor Subtype 3                                     | BRS3    |  |          | DisGenet |
| 510 | BR Serine/Threonine Kinase 1                                    | BRSK1   |  | GeneCard |          |
| 511 | Bromodomain and WD Repeat Domain Containing 1                   | BRWD1   |  | GeneCard |          |
| 512 | BSCL2 Lipid Droplet Biogenesis Associated, Seipin               | BSCL2   |  | GeneCard | DisGenet |
| 513 | Basigin (Ok Blood Group)                                        | BSG     |  | GeneCard | DisGenet |
| 514 | Betacellulin                                                    | BTC     |  | GeneCard |          |
| 515 | Basic Transcription Factor 3 Pseudogene 11                      | BTF3P11 |  |          | DisGenet |

|     |                                                               |           |      |          |          |
|-----|---------------------------------------------------------------|-----------|------|----------|----------|
| 516 | BTG Anti-Proliferation Factor 1                               | BTG1      |      | GeneCard |          |
| 517 | Bruton Tyrosine Kinase                                        | BTK       |      | GeneCard |          |
| 518 | B And T Lymphocyte Associated                                 | BTLA      |      | GeneCard | DisGenet |
| 519 | Butyrophilin Like 2                                           | BTNL2     |      | GeneCard |          |
| 520 | Beta-Transducin Repeat Containing E3 Ubiquitin Protein Ligase | BTRC      |      | GeneCard |          |
| 521 | BUB1 Mitotic Checkpoint Serine/Threonine Kinase B             | BUB1B     |      | GeneCard |          |
| 522 | BUD13 Homolog                                                 | BUD13     |      | GeneCard |          |
| 523 | Chromosome 12 Open Reading Frame 4                            | C12orf4   |      | GeneCard |          |
| 524 | Chromosome 12 Open Reading Frame 43                           | C12orf43  |      | GeneCard |          |
| 525 | Chromosome 19 Open Reading Frame 38                           | C19orf38  |      | GeneCard |          |
| 526 | C1D Nuclear Receptor Corepressor                              | C1D       |      |          | DisGenet |
| 527 | Chromosome 1 Open Reading Frame 116                           | C1orf116  |      | GeneCard |          |
| 528 | Chromosome 1 Open Reading Frame 21                            | C1orf21   |      | GeneCard |          |
| 529 | Complement C1q A Chain                                        | C1QA      | OMIM | GeneCard |          |
| 530 | Complement C1q B Chain                                        | C1QB      |      | GeneCard |          |
| 531 | Complement C1q Binding Protein                                | C1QBP     |      | GeneCard |          |
| 532 | Complement C1q C Chain                                        | C1QC      |      | GeneCard |          |
| 533 | Complement C1q Like 3                                         | C1QL3     |      | GeneCard | DisGenet |
| 534 | C1q and TNF Related 1                                         | C1QTNF1   |      | GeneCard | DisGenet |
| 535 | C1q and TNF Related 12                                        | C1QTNF12  |      | GeneCard | DisGenet |
| 536 | C1q and TNF Related 3                                         | C1QTNF3   |      | GeneCard |          |
| 537 | C1q and TNF Related 5                                         | C1QTNF5   |      | GeneCard | DisGenet |
| 538 | C1q and TNF Related 6                                         | C1QTNF6   |      | GeneCard | DisGenet |
| 539 | C1q and TNF Related 9                                         | C1QTNF9   |      | GeneCard | DisGenet |
| 540 | Complement C1r                                                | C1R       |      | GeneCard |          |
| 541 | Complement C1s                                                | C1S       |      | GeneCard |          |
| 542 | Complement C2                                                 | C2        |      | GeneCard |          |
| 543 | Chromosome 20 Open Reading Frame 181                          | C20orf181 |      |          | DisGenet |
| 544 | Complement C3                                                 | C3        |      | GeneCard | DisGenet |

|     |                                                                |          |      |          |          |
|-----|----------------------------------------------------------------|----------|------|----------|----------|
| 545 | Complement C3a Receptor 1                                      | C3AR1    |      | GeneCard |          |
| 546 | Complement C4A (Rodgers Blood Group)                           | C4A      |      | GeneCard |          |
| 547 | Complement C4B (Chido Blood Group)                             | C4B      |      | GeneCard |          |
| 548 | Complement Component 4B (Chido Blood Group), Copy 2            | C4B_2    |      | GeneCard |          |
| 549 | Complement Component 4 Binding Protein Alpha                   | C4BPA    |      | GeneCard |          |
| 550 | Complement Component 4 Binding Protein Beta                    | C4BPB    |      | GeneCard |          |
| 551 | Complement C5                                                  | C5       |      | GeneCard |          |
| 552 | Complement C5a Receptor 1                                      | C5AR1    |      | GeneCard |          |
| 553 | Complement C5a Receptor 2                                      | C5AR2    |      | GeneCard |          |
| 554 | Complement C6                                                  | C6       |      | GeneCard |          |
| 555 | Complement C7                                                  | C7       |      | GeneCard |          |
| 556 | Complement C8 Beta Chain                                       | C8B      |      | GeneCard |          |
| 557 | Chromosome 8 Open Reading Frame 48                             | C8orf48  |      | GeneCard |          |
| 558 | Complement C9                                                  | C9       |      | GeneCard |          |
| 559 | Chromosome 9 Open Reading Frame 50                             | C9orf50  |      | GeneCard |          |
| 560 | C9orf72-SMCR8 Complex Subunit                                  | C9orf72  |      | GeneCard |          |
| 561 | Carbonic Anhydrase 1                                           | CA1      |      | GeneCard | DisGenet |
| 562 | Carbonic Anhydrase 10                                          | CA10     |      | GeneCard |          |
| 563 | Carbonic Anhydrase 12                                          | CA12     |      | GeneCard |          |
| 564 | Carbonic Anhydrase 2                                           | CA2      |      | GeneCard | DisGenet |
| 565 | Carbonic Anhydrase 3                                           | CA3      |      | GeneCard |          |
| 566 | Carbonic Anhydrase 9                                           | CA9      |      | GeneCard |          |
| 567 | Calcineurin Binding Protein 1                                  | CABIN1   |      | GeneCard |          |
| 568 | Calcium Voltage-Gated Channel Subunit Alpha1 C                 | CACNA1C  | OMIM | GeneCard | DisGenet |
| 569 | Calcium Voltage-Gated Channel Subunit Alpha1 E                 | CACNA1E  |      | GeneCard |          |
| 570 | Calcium Voltage-Gated Channel Subunit Alpha1 H                 | CACNA1H  |      | GeneCard |          |
| 571 | Calcium Voltage-Gated Channel Auxiliary Subunit Alpha2delta 1  | CACNA2D1 |      | GeneCard |          |
| 572 | Calcium Voltage-Gated Channel Auxiliary Subunit Alpha2delta 3  | CACNA2D3 |      | GeneCard |          |
| 573 | Calcium Voltage-Gated Channel Auxiliary Subunit Alpha2 Delta 4 | CACNA2D4 |      |          | DisGenet |

|     |                                                                                  |          |  |          |          |
|-----|----------------------------------------------------------------------------------|----------|--|----------|----------|
| 574 | Calcium Voltage-Gated Channel Auxiliary Subunit Gamma 8                          | CACNG8   |  | GeneCard |          |
| 575 | Carbamoyl-Phosphate Synthetase 2, Aspartate Transcarbamylase, and Dihydroorotase | CAD      |  |          | DisGenet |
| 576 | Calcium Dependent Secretion Activator                                            | CADPS    |  | GeneCard |          |
| 577 | Calcitonin Related Polypeptide Alpha                                             | CALCA    |  | GeneCard |          |
| 578 | Calcium Binding and Coiled-Coil Domain 2                                         | CALCOCO2 |  | GeneCard |          |
| 579 | Calcitonin Receptor                                                              | CALCR    |  | GeneCard |          |
| 580 | Calmodulin 1                                                                     | CALM1    |  | GeneCard |          |
| 581 | Calmodulin 3                                                                     | CALM3    |  | GeneCard |          |
| 582 | Calreticulin                                                                     | CALR     |  | GeneCard | DisGenet |
| 583 | Calumenin                                                                        | CALU     |  | GeneCard | DisGenet |
| 584 | Calcium/Calmodulin Dependent Protein Kinase I                                    | CAMK1    |  | GeneCard |          |
| 585 | Calcium/Calmodulin Dependent Protein Kinase II Beta                              | CAMK2B   |  | GeneCard |          |
| 586 | Calcium/Calmodulin Dependent Protein Kinase II Delta                             | CAMK2D   |  | GeneCard |          |
| 587 | Calcium/Calmodulin Dependent Protein Kinase II Gamma                             | CAMK2G   |  | GeneCard |          |
| 588 | Calcium/Calmodulin Dependent Protein Kinase II Inhibitor 2                       | CAMK2N2  |  | GeneCard |          |
| 589 | Calcium/Calmodulin Dependent Protein Kinase IV                                   | CAMK4    |  | GeneCard |          |
| 590 | Calcium/Calmodulin Dependent Protein Kinase Kinase 2                             | CAMKK2   |  | GeneCard | DisGenet |
| 591 | Calcium Modulating Ligand                                                        | CAMLG    |  | GeneCard |          |
| 592 | Cathelicidin Antimicrobial Peptide                                               | CAMP     |  | GeneCard | DisGenet |
| 593 | Calmodulin Binding Transcription Activator 1                                     | CAMTA1   |  | GeneCard |          |
| 594 | Cullin Associated and Neddylation Dissociated 1                                  | CAND1    |  | GeneCard |          |
| 595 | Calcium Activated Nucleotidase 1                                                 | CANT1    |  | GeneCard |          |
| 596 | Calnexin                                                                         | CANX     |  | GeneCard | DisGenet |
| 597 | Cyclase Associated Actin Cytoskeleton Regulatory Protein 1                       | CAP1     |  | GeneCard | DisGenet |
| 598 | Capping Actin Protein, Gelsolin Like                                             | CAPG     |  | GeneCard | DisGenet |
| 599 | Calpain 1                                                                        | CAPN1    |  | GeneCard | DisGenet |
| 600 | Calpain 10                                                                       | CAPN10   |  | GeneCard | DisGenet |
| 601 | Calpain 2                                                                        | CAPN2    |  | GeneCard |          |
| 602 | Calpain 5                                                                        | CAPN5    |  | GeneCard |          |

|     |                                                     |         |  |          |          |
|-----|-----------------------------------------------------|---------|--|----------|----------|
| 603 | Calpain 6                                           | CAPN6   |  | GeneCard |          |
| 604 | Cell Cycle Associated Protein 1                     | CAPRIN1 |  | GeneCard |          |
| 605 | Calcyphosine 2                                      | CAPS2   |  | GeneCard |          |
| 606 | Capping Actin Protein of Muscle Z-Line Subunit Beta | CAPZB   |  | GeneCard |          |
| 607 | Caspase Recruitment Domain Family Member 16         | CARD16  |  | GeneCard |          |
| 608 | Caspase Recruitment Domain Family Member 8          | CARD8   |  | GeneCard | DisGenet |
| 609 | Caspase Recruitment Domain Family Member 9          | CARD9   |  | GeneCard | DisGenet |
| 610 | Calcium Regulated Heat Stable Protein 1             | CARHSP1 |  | GeneCard | DisGenet |
| 611 | Cardiac Mesoderm Enhancer-Associated Non-Coding RNA | CARMN   |  | GeneCard |          |
| 612 | CART Prepropeptide                                  | CARTPT  |  | GeneCard |          |
| 613 | Cancer Susceptibility 11                            | CASC11  |  | GeneCard | DisGenet |
| 614 | Cancer Susceptibility 2                             | CASC2   |  | GeneCard |          |
| 615 | Caspase 1                                           | CASP1   |  | GeneCard | DisGenet |
| 616 | Caspase 2                                           | CASP2   |  | GeneCard |          |
| 617 | Caspase 3                                           | CASP3   |  | GeneCard | DisGenet |
| 618 | Caspase 4                                           | CASP4   |  | GeneCard |          |
| 619 | Caspase 6                                           | CASP6   |  | GeneCard |          |
| 620 | Caspase 7                                           | CASP7   |  | GeneCard |          |
| 621 | Caspase 8                                           | CASP8   |  | GeneCard |          |
| 622 | Caspase 9                                           | CASP9   |  | GeneCard | DisGenet |
| 623 | Calsequestrin 2                                     | CASQ2   |  | GeneCard |          |
| 624 | Calcium Sensing Receptor                            | CASR    |  | GeneCard | DisGenet |
| 625 | Calpastatin                                         | CAST    |  | GeneCard | DisGenet |
| 626 | Castor Zinc Finger 1                                | CASZ1   |  | GeneCard | DisGenet |
| 627 | Catalase                                            | CAT     |  | GeneCard | DisGenet |
| 628 | Caveolin 1                                          | CAV1    |  | GeneCard | DisGenet |
| 629 | Caveolin 2                                          | CAV2    |  | GeneCard |          |
| 630 | Caveolin 3                                          | CAV3    |  | GeneCard |          |
| 631 | Caveolae Associated Protein 1                       | CAVIN1  |  | GeneCard | DisGenet |

|     |                                         |         |  |          |          |
|-----|-----------------------------------------|---------|--|----------|----------|
| 632 | Caveolae Associated Protein 3           | CAVIN3  |  | GeneCard |          |
| 633 | Caveolae Associated Protein 4           | CAVIN4  |  | GeneCard |          |
| 634 | Cbl Proto-Oncogene                      | CBL     |  | GeneCard |          |
| 635 | Cbl Proto-Oncogene Like 1               | CBLL1   |  | GeneCard |          |
| 636 | Carbonyl Reductase 1                    | CBR1    |  | GeneCard |          |
| 637 | Cystathionine Beta-Synthase             | CBS     |  | GeneCard | DisGenet |
| 638 | Cystathionine Beta-Synthase Like        | CBSL    |  |          | DisGenet |
| 639 | Chromobox 1                             | CBX1    |  | GeneCard |          |
| 640 | Chromobox 3                             | CBX3    |  | GeneCard |          |
| 641 | Chromobox 4                             | CBX4    |  | GeneCard |          |
| 642 | Chromobox 5                             | CBX5    |  | GeneCard |          |
| 643 | Cell Cycle and Apoptosis Regulator 2    | CCAR2   |  | GeneCard | DisGenet |
| 644 | Coiled-Coil Domain Containing 105       | CCDC105 |  | GeneCard |          |
| 645 | Coiled-Coil Domain Containing 157       | CCDC157 |  | GeneCard |          |
| 646 | Coiled-Coil Domain Containing 159       | CCDC159 |  | GeneCard |          |
| 647 | Coiled-Coil Domain Containing 170       | CCDC170 |  | GeneCard |          |
| 648 | Coiled-Coil Domain Containing 178       | CCDC178 |  | GeneCard |          |
| 649 | Coiled-Coil Domain Containing 3         | CCDC3   |  | GeneCard |          |
| 650 | Coiled-Coil Domain Containing 71 Like   | CCDC71L |  | GeneCard |          |
| 651 | Coiled-Coil Domain Containing 8         | CCDC8   |  |          | DisGenet |
| 652 | Coiled-Coil Domain Containing 80        | CCDC80  |  | GeneCard | DisGenet |
| 653 | Coiled-Coil Domain Containing 88B       | CCDC88B |  | GeneCard |          |
| 654 | Coiled-Coil Domain Containing 92        | CCDC92  |  | GeneCard |          |
| 655 | Coiled-Coil Alpha-Helical Rod Protein 1 | CCHCR1  |  |          | DisGenet |
| 656 | Cholecystokinin                         | CCK     |  | GeneCard |          |
| 657 | C-C Motif Chemokine Ligand 1            | CCL1    |  | GeneCard | DisGenet |
| 658 | C-C Motif Chemokine Ligand 11           | CCL11   |  | GeneCard | DisGenet |
| 659 | C-C Motif Chemokine Ligand 13           | CCL13   |  | GeneCard |          |
| 660 | C-C Motif Chemokine Ligand 14           | CCL14   |  | GeneCard |          |



|     |                                         |        |  |          |          |
|-----|-----------------------------------------|--------|--|----------|----------|
| 661 | C-C Motif Chemokine Ligand 15           | CCL15  |  | GeneCard |          |
| 662 | C-C Motif Chemokine Ligand 16           | CCL16  |  | GeneCard |          |
| 663 | C-C Motif Chemokine Ligand 17           | CCL17  |  | GeneCard | DisGenet |
| 664 | C-C Motif Chemokine Ligand 18           | CCL18  |  | GeneCard | DisGenet |
| 665 | C-C Motif Chemokine Ligand 19           | CCL19  |  | GeneCard | DisGenet |
| 666 | C-C Motif Chemokine Ligand 2            | CCL2   |  | GeneCard | DisGenet |
| 667 | C-C Motif Chemokine Ligand 20           | CCL20  |  | GeneCard | DisGenet |
| 668 | C-C Motif Chemokine Ligand 21           | CCL21  |  | GeneCard | DisGenet |
| 669 | C-C Motif Chemokine Ligand 22           | CCL22  |  | GeneCard | DisGenet |
| 670 | C-C Motif Chemokine Ligand 23           | CCL23  |  | GeneCard | DisGenet |
| 671 | C-C Motif Chemokine Ligand 24           | CCL24  |  | GeneCard |          |
| 672 | C-C Motif Chemokine Ligand 25           | CCL25  |  | GeneCard | DisGenet |
| 673 | C-C Motif Chemokine Ligand 26           | CCL26  |  | GeneCard |          |
| 674 | C-C Motif Chemokine Ligand 27           | CCL27  |  | GeneCard |          |
| 675 | C-C Motif Chemokine Ligand 28           | CCL28  |  | GeneCard |          |
| 676 | C-C Motif Chemokine Ligand 3            | CCL3   |  | GeneCard | DisGenet |
| 677 | C-C Motif Chemokine Ligand 4            | CCL4   |  | GeneCard | DisGenet |
| 678 | C-C Motif Chemokine Ligand 4 Like 1     | CCL4L1 |  | GeneCard | DisGenet |
| 679 | C-C motif chemokine ligand 4 like 2     | CCL4L2 |  |          | DisGenet |
| 680 | C-C Motif Chemokine Ligand 5            | CCL5   |  | GeneCard | DisGenet |
| 681 | C-C Motif Chemokine Ligand 7            | CCL7   |  | GeneCard | DisGenet |
| 682 | C-C Motif Chemokine Ligand 8            | CCL8   |  | GeneCard | DisGenet |
| 683 | CCM2 Scaffold Protein                   | CCM2   |  | GeneCard |          |
| 684 | Cellular Communication Network Factor 1 | CCN1   |  | GeneCard | DisGenet |
| 685 | Cellular Communication Network Factor 2 | CCN2   |  | GeneCard | DisGenet |
| 686 | Cellular Communication Network Factor 3 | CCN3   |  | GeneCard | DisGenet |
| 687 | Cellular Communication Network Factor 4 | CCN4   |  | GeneCard |          |
| 688 | Cellular Communication Network Factor 5 | CCN5   |  | GeneCard | DisGenet |
| 689 | Cellular Communication Network Factor 6 | CCN6   |  | GeneCard |          |

|     |                                       |       |      |          |          |
|-----|---------------------------------------|-------|------|----------|----------|
| 690 | Cyclin A2                             | CCNA2 |      | GeneCard |          |
| 691 | Cyclin B1                             | CCNB1 |      | GeneCard |          |
| 692 | Cyclin B2                             | CCNB2 |      | GeneCard |          |
| 693 | Cyclin D1                             | CCND1 |      | GeneCard | DisGenet |
| 694 | Cyclin D2                             | CCND2 |      | GeneCard |          |
| 695 | Cyclin D3                             | CCND3 |      | GeneCard |          |
| 696 | Cyclin E1                             | CCNE1 |      | GeneCard |          |
| 697 | Cyclin F                              | CCNF  |      | GeneCard |          |
| 698 | Cyclin H                              | CCNH  |      | GeneCard |          |
| 699 | Cyclin T1                             | CCNT1 |      | GeneCard |          |
| 700 | C-C Motif Chemokine Receptor 1        | CCR1  |      | GeneCard |          |
| 701 | C-C Motif Chemokine Receptor 2        | CCR2  | OMIM | GeneCard | DisGenet |
| 702 | C-C Motif Chemokine Receptor 3        | CCR3  |      | GeneCard | DisGenet |
| 703 | C-C Motif Chemokine Receptor 4        | CCR4  |      | GeneCard |          |
| 704 | C-C Motif Chemokine Receptor 5        | CCR5  |      | GeneCard | DisGenet |
| 705 | C-C Motif Chemokine Receptor 6        | CCR6  |      | GeneCard | DisGenet |
| 706 | C-C Motif Chemokine Receptor 7        | CCR7  |      | GeneCard | DisGenet |
| 707 | C-C Motif Chemokine Receptor 8        | CCR8  |      | GeneCard | DisGenet |
| 708 | C-C Motif Chemokine Receptor 9        | CCR9  |      | GeneCard | DisGenet |
| 709 | C-C Motif Chemokine Receptor Like 2   | CCRL2 |      | GeneCard |          |
| 710 | Chaperonin Containing TCP1 Subunit 2  | CCT2  |      | GeneCard |          |
| 711 | Chaperonin Containing TCP1 Subunit 4  | CCT4  |      | GeneCard |          |
| 712 | Chaperonin Containing TCP1 Subunit 6A | CCT6A |      | GeneCard |          |
| 713 | Chaperonin Containing TCP1 Subunit 7  | CCT7  |      | GeneCard |          |
| 714 | Chaperonin Containing TCP1 Subunit 8  | CCT8  |      | GeneCard |          |
| 715 | CD14 antigen                          | CD14  | OMIM | GeneCard | DisGenet |
| 716 | CD151 Molecule (Raph Blood Group)     | CD151 |      | GeneCard |          |
| 717 | CD160 Molecule                        | CD160 |      | GeneCard |          |
| 718 | CD163 Molecule                        | CD163 |      | GeneCard | DisGenet |

|     |                                                                |         |      |          |          |
|-----|----------------------------------------------------------------|---------|------|----------|----------|
| 719 | CD163 Molecule Like 1                                          | CD163L1 |      | GeneCard |          |
| 720 | CD180 molecule                                                 | CD180   |      |          | DisGenet |
| 721 | CD19 Molecule                                                  | CD19    |      | GeneCard | DisGenet |
| 722 | CD1a Molecule                                                  | CD1A    |      | GeneCard |          |
| 723 | CD1c Molecule                                                  | CD1C    |      | GeneCard |          |
| 724 | CD1d Molecule                                                  | CD1D    |      | GeneCard | DisGenet |
| 725 | CD2 Molecule                                                   | CD2     |      | GeneCard |          |
| 726 | CD209 Molecule                                                 | CD209   |      | GeneCard |          |
| 727 | CD22 Molecule                                                  | CD22    |      | GeneCard |          |
| 728 | CD247 Molecule                                                 | CD247   |      | GeneCard |          |
| 729 | CD248 Molecule                                                 | CD248   |      | GeneCard | DisGenet |
| 730 | CD27 Molecule                                                  | CD27    |      | GeneCard | DisGenet |
| 731 | CD274 Molecule                                                 | CD274   |      | GeneCard | DisGenet |
| 732 | CD276 Molecule                                                 | CD276   |      | GeneCard |          |
| 733 | CD28 Molecule                                                  | CD28    |      | GeneCard | DisGenet |
| 734 | CD34 Molecule                                                  | CD34    |      | GeneCard | DisGenet |
| 735 | CD36 antigen (collagen type I)                                 | CD36    | OMIM | GeneCard | DisGenet |
| 736 | CD38 Molecule                                                  | CD38    |      | GeneCard |          |
| 737 | CD4 Molecule                                                   | CD4     |      | GeneCard |          |
| 738 | CD40 Molecule                                                  | CD40    |      | GeneCard | DisGenet |
| 739 | CD40 Ligand                                                    | CD40LG  |      | GeneCard | DisGenet |
| 740 | CD44 Molecule (Indian Blood Group)                             | CD44    |      | GeneCard | DisGenet |
| 741 | CD46 Molecule                                                  | CD46    |      | GeneCard | DisGenet |
| 742 | CD47 Antigen (Rh-related antigen; integrin-associated protein) | CD47    | OMIM | GeneCard | DisGenet |
| 743 | CD5 Molecule                                                   | CD5     |      | GeneCard |          |
| 744 | CD55 Molecule (Cromer Blood Group)                             | CD55    |      | GeneCard |          |
| 745 | CD58 Molecule                                                  | CD58    |      | GeneCard |          |
| 746 | CD59 Molecule (CD59 Blood Group)                               | CD59    |      | GeneCard | DisGenet |
| 747 | CD5 Antigen-like (scavenger receptor cysteine rich family)     | CD5L    | OMIM | GeneCard | DisGenet |

|     |                                |          |  |          |          |
|-----|--------------------------------|----------|--|----------|----------|
| 748 | CD63 Molecule                  | CD63     |  | GeneCard |          |
| 749 | CD68 Molecule                  | CD68     |  | GeneCard | DisGenet |
| 750 | CD69 Molecule                  | CD69     |  | GeneCard | DisGenet |
| 751 | CD70 Molecule                  | CD70     |  | GeneCard | DisGenet |
| 752 | CD72 Molecule                  | CD72     |  | GeneCard |          |
| 753 | CD74 Molecule                  | CD74     |  | GeneCard | DisGenet |
| 754 | CD79a Molecule                 | CD79A    |  | GeneCard |          |
| 755 | CD80 Molecule                  | CD80     |  | GeneCard | DisGenet |
| 756 | CD81 Molecule                  | CD81     |  | GeneCard | DisGenet |
| 757 | CD83 Molecule                  | CD83     |  | GeneCard |          |
| 758 | CD84 Molecule                  | CD84     |  | GeneCard |          |
| 759 | CD86 Molecule                  | CD86     |  | GeneCard | DisGenet |
| 760 | CD8a Molecule                  | CD8A     |  | GeneCard |          |
| 761 | CD9 Molecule                   | CD9      |  | GeneCard |          |
| 762 | CD99 Molecule (Xg blood group) | CD99     |  |          | DisGenet |
| 763 | Cell Division Cycle 42         | CDC42    |  | GeneCard | DisGenet |
| 764 | CDC42 Effector Protein 3       | CDC42EP3 |  | GeneCard |          |
| 765 | Cell Division Cycle 5 Like     | CDC5L    |  | GeneCard |          |
| 766 | Cadherin 1                     | CDH1     |  | GeneCard | DisGenet |
| 767 | Cadherin 13                    | CDH13    |  | GeneCard | DisGenet |
| 768 | Cadherin 2                     | CDH2     |  | GeneCard |          |
| 769 | Cadherin Related 23            | CDH23    |  | GeneCard |          |
| 770 | Cadherin 4                     | CDH4     |  | GeneCard |          |
| 771 | Cadherin 5                     | CDH5     |  | GeneCard | DisGenet |
| 772 | Cadherin 7                     | CDH7     |  | GeneCard |          |
| 773 | Cadherin 9                     | CDH9     |  | GeneCard |          |
| 774 | Cyclin Dependent Kinase 1      | CDK1     |  | GeneCard |          |
| 775 | Cyclin Dependent Kinase 14     | CDK14    |  | GeneCard |          |
| 776 | Cyclin Dependent Kinase 2      | CDK2     |  | GeneCard | DisGenet |

|     |                                                     |            |  |          |          |
|-----|-----------------------------------------------------|------------|--|----------|----------|
| 777 | Cyclin Dependent Kinase 3                           | CDK3       |  | GeneCard |          |
| 778 | Cyclin Dependent Kinase 4                           | CDK4       |  | GeneCard |          |
| 779 | Cyclin Dependent Kinase 5                           | CDK5       |  | GeneCard | DisGenet |
| 780 | CDK5 Regulatory Subunit Associated Protein 3        | CDK5RAP3   |  | GeneCard |          |
| 781 | Cyclin Dependent Kinase 6                           | CDK6       |  | GeneCard |          |
| 782 | Cyclin Dependent Kinase 7                           | CDK7       |  | GeneCard |          |
| 783 | Cyclin Dependent Kinase 9                           | CDK9       |  | GeneCard | DisGenet |
| 784 | CDK5 Regulatory Subunit Associated Protein 1 Like 1 | CDKAL1     |  | GeneCard | DisGenet |
| 785 | Cyclin Dependent Kinase Inhibitor 1A                | CDKN1A     |  | GeneCard | DisGenet |
| 786 | Cyclin Dependent Kinase Inhibitor 1B                | CDKN1B     |  | GeneCard | DisGenet |
| 787 | Cyclin Dependent Kinase Inhibitor 1C                | CDKN1C     |  | GeneCard | DisGenet |
| 788 | Cyclin Dependent Kinase Inhibitor 2A                | CDKN2A     |  | GeneCard | DisGenet |
| 789 | Cyclin Dependent Kinase Inhibitor 2B                | CDKN2B     |  | GeneCard | DisGenet |
| 790 | CDKN2B Antisense RNA 1                              | CDKN2B-AS1 |  | GeneCard | DisGenet |
| 791 | Cyclin Dependent Kinase Inhibitor 3                 | CDKN3      |  | GeneCard |          |
| 792 | Cysteine Dioxygenase Type 1                         | CDO1       |  | GeneCard |          |
| 793 | Cerebellar Degeneration Related Protein 1           | CDR1       |  | GeneCard |          |
| 794 | CDR1 antisense RNA                                  | CDR1-AS    |  |          | DisGenet |
| 795 | CMT1A Duplicated Region Transcript 7                | CDRT7      |  | GeneCard |          |
| 796 | CMT1A Duplicated Region Transcript 8                | CDRT8      |  | GeneCard |          |
| 797 | CEA Cell Adhesion Molecule 1                        | CEACAM1    |  | GeneCard | DisGenet |
| 798 | CEA Cell Adhesion Molecule 3                        | CEACAM3    |  | GeneCard |          |
| 799 | CEA Cell Adhesion Molecule 5                        | CEACAM5    |  | GeneCard |          |
| 800 | CEA Cell Adhesion Molecule 8                        | CEACAM8    |  | GeneCard |          |
| 801 | CCAAT Enhancer Binding Protein Alpha                | CEBPA      |  | GeneCard | DisGenet |
| 802 | CCAAT Enhancer Binding Protein Beta                 | CEBPB      |  | GeneCard | DisGenet |
| 803 | CCAAT Enhancer Binding Protein Delta                | CEBPD      |  | GeneCard |          |
| 804 | CCAAT Enhancer Binding Protein Zeta                 | CEBPZ      |  | GeneCard |          |
| 805 | Carboxyl Ester Lipase                               | CEL        |  | GeneCard | DisGenet |

|     |                                               |        |      |          |          |
|-----|-----------------------------------------------|--------|------|----------|----------|
| 806 | Chymotrypsin-like elastase family, member 2A  | CELA2A | OMIM | GeneCard | DisGenet |
| 807 | Cadherin EGF LAG Seven-Pass G-Type Receptor 1 | CELSR1 |      | GeneCard |          |
| 808 | Cadherin EGF LAG Seven-Pass G-Type Receptor 2 | CELSR2 |      | GeneCard |          |
| 809 | Cell Migration Inducing Hyaluronidase 1       | CEMIP  |      | GeneCard |          |
| 810 | Centromere Protein A                          | CENPA  |      | GeneCard |          |
| 811 | Centromere Protein B                          | CENPB  |      | GeneCard |          |
| 812 | Centrosomal Protein 19                        | CEP19  |      | GeneCard |          |
| 813 | Centrosomal Protein 290                       | CEP290 |      | GeneCard |          |
| 814 | Centrosomal Protein 295                       | CEP295 |      | GeneCard |          |
| 815 | Centrosomal Protein 43                        | CEP43  |      | GeneCard |          |
| 816 | Centrosomal Protein 85 Like                   | CEP85L |      | GeneCard |          |
| 817 | Ceramide Synthase 5                           | CERS5  |      | GeneCard |          |
| 818 | Carboxylesterase 1                            | CES1   |      | GeneCard | DisGenet |
| 819 | Carboxylesterase 2                            | CES2   |      | GeneCard |          |
| 820 | Carboxylesterase 3                            | CES3   |      |          | DisGenet |
| 821 | Cholesteryl Ester Transfer Protein            | CETP   |      | GeneCard | DisGenet |
| 822 | Cilia And Flagella Associated Protein 47      | CFAP47 |      | GeneCard |          |
| 823 | Cilia And Flagella Associated Protein 91      | CFAP91 |      | GeneCard |          |
| 824 | Complement Factor B                           | CFB    |      | GeneCard |          |
| 825 | Complement Factor D                           | CFD    |      | GeneCard |          |
| 826 | Craniofacial Development Protein 1            | CFDP1  |      | GeneCard | DisGenet |
| 827 | Complement factor H                           | CFH    | OMIM | GeneCard | DisGenet |
| 828 | Complement Factor H Related 1                 | CFHR1  |      | GeneCard |          |
| 829 | Complement Factor H Related 2                 | CFHR2  |      | GeneCard |          |
| 830 | Complement Factor I                           | CFI    |      | GeneCard |          |
| 831 | Cofilin 1                                     | CFL1   |      | GeneCard |          |
| 832 | Cofilin 2                                     | CFL2   |      | GeneCard |          |
| 833 | CASP8 And FADD Like Apoptosis Regulator       | CFLAR  |      | GeneCard |          |
| 834 | Complement Factor Properdin                   | CFP    |      | GeneCard |          |

|     |                                                            |         |  |          |          |
|-----|------------------------------------------------------------|---------|--|----------|----------|
| 835 | CF Transmembrane Conductance Regulator                     | CFTR    |  | GeneCard |          |
| 836 | Glycoprotein Hormones, Alpha Polypeptide                   | CGA     |  | GeneCard |          |
| 837 | Cholesterol 25-Hydroxylase                                 | CH25H   |  | GeneCard | DisGenet |
| 838 | ChaC Glutathione Specific Gamma-Glutamylcyclotransferase 1 | CHAC1   |  | GeneCard |          |
| 839 | Chondroadherin                                             | CHAD    |  | GeneCard |          |
| 840 | Choline O-Acetyltransferase                                | CHAT    |  | GeneCard |          |
| 841 | Coiled-Coil-Helix-Coiled-Coil-Helix Domain Containing 10   | CHCHD10 |  | GeneCard |          |
| 842 | Chromodomain Helicase DNA Binding Protein 1                | CHD1    |  | GeneCard |          |
| 843 | Chromodomain Helicase DNA Binding Protein 3                | CHD3    |  | GeneCard |          |
| 844 | Chromodomain Helicase DNA Binding Protein 4                | CHD4    |  | GeneCard |          |
| 845 | Chromodomain Helicase DNA Binding Protein 7                | CHD7    |  | GeneCard |          |
| 846 | Choline Dehydrogenase                                      | CHDH    |  |          | DisGenet |
| 847 | Coronary Heart Disease, Susceptibility To, 1               | CHDS1   |  | GeneCard |          |
| 848 | Coronary Heart Disease, Susceptibility To, 2               | CHDS2   |  | GeneCard |          |
| 849 | Coronary Heart Disease, Susceptibility To, 3               | CHDS3   |  | GeneCard |          |
| 850 | Coronary Heart Disease, Susceptibility To, 4               | CHDS4   |  | GeneCard |          |
| 851 | Coronary Heart Disease, Susceptibility To, 8               | CHDS8   |  | GeneCard |          |
| 852 | Coronary Heart Disease, Susceptibility To, 9               | CHDS9   |  | GeneCard |          |
| 853 | Checkpoint Kinase 2                                        | CHEK2   |  | GeneCard |          |
| 854 | Checkpoint With Forkhead and Ring Finger Domains           | CHFR    |  | GeneCard |          |
| 855 | Chromogranin A                                             | CHGA    |  | GeneCard | DisGenet |
| 856 | Chitinase 3 Like 1                                         | CHI3L1  |  | GeneCard | DisGenet |
| 857 | Chitinase 1                                                | CHIT1   |  | GeneCard | DisGenet |
| 858 | Choline Kinase Alpha                                       | CHKA    |  | GeneCard |          |
| 859 | Choline Kinase Beta                                        | CHKB    |  | GeneCard |          |
| 860 | Charged Multivesicular Body Protein 2B                     | CHMP2B  |  | GeneCard | DisGenet |
| 861 | Choline Phosphotransferase 1                               | CHPT1   |  | GeneCard |          |
| 862 | Cholinergic Receptor Muscarinic 1                          | CHRM1   |  | GeneCard |          |
| 863 | Cholinergic Receptor Muscarinic 2                          | CHRM2   |  | GeneCard |          |

|     |                                                                                 |         |  |          |          |
|-----|---------------------------------------------------------------------------------|---------|--|----------|----------|
| 864 | Cholinergic Receptor Muscarinic 3                                               | CHRM3   |  | GeneCard | DisGenet |
| 865 | Cholinergic Receptor Nicotinic Alpha 2 Subunit                                  | CHRNA2  |  | GeneCard |          |
| 866 | Cholinergic Receptor Nicotinic Alpha 3 Subunit                                  | CHRNA3  |  | GeneCard |          |
| 867 | Cholinergic Receptor Nicotinic Alpha 4 subunit                                  | CHRNA4  |  |          | DisGenet |
| 868 | Cholinergic Receptor Nicotinic Alpha 5 Subunit                                  | CHRNA5  |  | GeneCard | DisGenet |
| 869 | Cholinergic Receptor Nicotinic Alpha 7 Subunit                                  | CHRNA7  |  | GeneCard |          |
| 870 | Cholinergic Receptor Nicotinic Beta 4 Subunit                                   | CHRN4   |  | GeneCard |          |
| 871 | Cholesterol Induced Regulator of Metabolism RNA                                 | CHROMR  |  | GeneCard |          |
| 872 | Carbohydrate Sulfotransferase 1                                                 | CHST1   |  | GeneCard |          |
| 873 | Carbohydrate Sulfotransferase 2                                                 | CHST2   |  | GeneCard |          |
| 874 | Carbohydrate Sulfotransferase 3                                                 | CHST3   |  | GeneCard | DisGenet |
| 875 | Component Of Inhibitor Of Nuclear Factor Kappa B Kinase Complex                 | CHUK    |  | GeneCard |          |
| 876 | Cytokine Induced Apoptosis Inhibitor 1                                          | CIAPIN1 |  | GeneCard |          |
| 877 | Calcium And Integrin Binding Family Member 4                                    | CIB4    |  | GeneCard |          |
| 878 | Cell Death Inducing DFFA Like Effector C                                        | CIDEC   |  | GeneCard | DisGenet |
| 879 | Class II Major Histocompatibility Complex Transactivator                        | CIITA   |  | GeneCard |          |
| 880 | Cartilage Intermediate Layer Protein 2                                          | CILP2   |  | GeneCard |          |
| 881 | Carotid Intimal Medial Thickness                                                | CIMT    |  | GeneCard | DisGenet |
| 882 | Cellular inhibitor of PP2A                                                      | CIP2A   |  |          | DisGenet |
| 883 | CDGSH Iron Sulfur Domain 1                                                      | CISD1   |  |          | DisGenet |
| 884 | Cytokine Inducible SH2 Containing Protein                                       | CISH    |  | GeneCard | DisGenet |
| 885 | Citron Rho-Interacting Serine/Threonine Kinase                                  | CIT     |  |          | DisGenet |
| 886 | Cbp/P300 Interacting Transactivator with Glu/Asp Rich Carboxy-Terminal Domain 2 | CITED2  |  | GeneCard |          |
| 887 | Creatine Kinase B                                                               | CKB     |  | GeneCard |          |
| 888 | Chemokine Like Factor                                                           | CKLF    |  | GeneCard |          |
| 889 | Creatine Kinase, M-Type                                                         | CKM     |  | GeneCard |          |
| 890 | Creatine Kinase, Mitochondrial 2                                                | CKMT2   |  | GeneCard |          |
| 891 | CLK4 Associating Serine/Arginine Rich Protein                                   | CLASRP  |  | GeneCard |          |
| 892 | Chloride Channel CLIC Like 1                                                    | CLCC1   |  | GeneCard |          |



|     |                                                                 |         |  |          |          |
|-----|-----------------------------------------------------------------|---------|--|----------|----------|
| 893 | Cardiotrophin Like Cytokine Factor 1                            | CLCF1   |  |          | DisGenet |
| 894 | Chloride Voltage-Gated Channel 1                                | CLCN1   |  | GeneCard |          |
| 895 | Chloride Voltage-Gated Channel 2                                | CLCN2   |  |          | DisGenet |
| 896 | Claudin 1                                                       | CLDN1   |  |          | DisGenet |
| 897 | Claudin 5                                                       | CLDN5   |  | GeneCard |          |
| 898 | Claudin 7                                                       | CLDN7   |  |          | DisGenet |
| 899 | C-Type Lectin Domain Family 12 Member A                         | CLEC12A |  | GeneCard |          |
| 900 | C-Type Lectin Domain Containing 16A                             | CLEC16A |  | GeneCard |          |
| 901 | C-Type Lectin Domain Family 1 Member A                          | CLEC1A  |  | GeneCard |          |
| 902 | C-Type Lectin Domain Family 3 Member B                          | CLEC3B  |  | GeneCard |          |
| 903 | C-Type Lectin Domain Family 4 Member A                          | CLEC4A  |  | GeneCard |          |
| 904 | C-Type Lectin Domain Family 4 Member C                          | CLEC4C  |  | GeneCard |          |
| 905 | C-type Lectin Domain Family 4 Member D                          | CLEC4D  |  |          | DisGenet |
| 906 | C-Type Lectin Domain Family 4 Member E                          | CLEC4E  |  | GeneCard | DisGenet |
| 907 | C-Type Lectin Domain Containing 5A                              | CLEC5A  |  | GeneCard | DisGenet |
| 908 | C-Type Lectin Domain Containing 6A                              | CLEC6A  |  | GeneCard | DisGenet |
| 909 | C-Type Lectin Domain Containing 7A                              | CLEC7A  |  | GeneCard | DisGenet |
| 910 | C-type Lectin Domain Containing 9A                              | CLEC9A  |  |          | DisGenet |
| 911 | Calmegin                                                        | CLGN    |  | GeneCard |          |
| 912 | Chloride Intracellular Channel 1                                | CLIC1   |  |          | DisGenet |
| 913 | Chloride Intracellular Channel 4                                | CLIC4   |  | GeneCard | DisGenet |
| 914 | Chloride Intracellular Channel 5                                | CLIC5   |  | GeneCard |          |
| 915 | Clathrin Interactor 1                                           | CLINT1  |  | GeneCard |          |
| 916 | CAP-Gly Domain Containing Linker Protein 1                      | CLIP1   |  | GeneCard |          |
| 917 | Clock Circadian Regulator                                       | CLOCK   |  | GeneCard | DisGenet |
| 918 | Caseinolytic Mitochondrial Matrix Peptidase Proteolytic Subunit | CLPP    |  | GeneCard |          |
| 919 | Colipase                                                        | CLPS    |  | GeneCard |          |
| 920 | CLPTM1 Like                                                     | CLPTM1L |  | GeneCard |          |
| 921 | Clathrin Heavy Chain                                            | CLTC    |  | GeneCard |          |

|     |                                                                                                                                        |         |      |          |          |
|-----|----------------------------------------------------------------------------------------------------------------------------------------|---------|------|----------|----------|
| 922 | Clathrin Heavy Chain Like 1                                                                                                            | CLTCL1  |      | GeneCard |          |
| 923 | Clusterin (complement lysis inhibitor, SP-40,40; sulfated glycoprotein 2; testosterone-repressed prostate message-2; apolipoprotein J) | CLU     | OMIM | GeneCard | DisGenet |
| 924 | Chymase 1                                                                                                                              | CMA1    |      | GeneCard | DisGenet |
| 925 | Chemerin Chemokine-Like Receptor 1                                                                                                     | CMKLR1  |      | GeneCard | DisGenet |
| 926 | Cytidine/Uridine Monophosphate Kinase 2                                                                                                | CMPK2   |      | GeneCard |          |
| 927 | CKLF Like MARVEL Transmembrane Domain Containing 5                                                                                     | CMTM5   |      | GeneCard |          |
| 928 | CKLF Like MARVEL Transmembrane Domain Containing 7                                                                                     | CMTM7   |      | GeneCard |          |
| 929 | CCHC-type zinc finger nucleic acid binding protein                                                                                     | CNBP    |      |          | DisGenet |
| 930 | Chondromodulin                                                                                                                         | CNMD    |      | GeneCard |          |
| 931 | Calponin 1                                                                                                                             | CNN1    |      | GeneCard |          |
| 932 | Calponin 2                                                                                                                             | CNN2    |      |          | DisGenet |
| 933 | CCR4-NOT Transcription Complex Subunit 3                                                                                               | CNOT3   |      | GeneCard |          |
| 934 | 2',3'-cyclic nucleotide 3' phosphodiesterase                                                                                           | CNP     |      |          | DisGenet |
| 935 | Cannabinoid Receptor 1                                                                                                                 | CNR1    |      | GeneCard | DisGenet |
| 936 | Cannabinoid receptor 2                                                                                                                 | CNR2    | OMIM | GeneCard | DisGenet |
| 937 | Centlein                                                                                                                               | CNTLN   |      | GeneCard |          |
| 938 | Contactin 1                                                                                                                            | CNTN1   |      | GeneCard |          |
| 939 | Contactin 3                                                                                                                            | CNTN3   |      |          | DisGenet |
| 940 | Contactin 5                                                                                                                            | CNTN5   |      | GeneCard |          |
| 941 | Contactin Associated Protein 2                                                                                                         | CNTNAP2 |      | GeneCard |          |
| 942 | Component Of Oligomeric Golgi Complex 2                                                                                                | COG2    |      | GeneCard |          |
| 943 | Collagen Type X Alpha 1 Chain                                                                                                          | COL10A1 |      | GeneCard |          |
| 944 | Collagen Type XV Alpha 1 Chain                                                                                                         | COL15A1 | OMIM | GeneCard | DisGenet |
| 945 | Collagen Type XVIII Alpha 1 Chain                                                                                                      | COL18A1 |      | GeneCard | DisGenet |
| 946 | Collagen Type I Alpha 1 Chain                                                                                                          | COL1A1  |      | GeneCard | DisGenet |
| 947 | Collagen Type I Alpha 2 Chain                                                                                                          | COL1A2  |      | GeneCard |          |
| 948 | Collagen Type XX Alpha 1 Chain                                                                                                         | COL20A1 |      | GeneCard |          |
| 949 | Collagen Type II Alpha 1 Chain                                                                                                         | COL2A1  |      | GeneCard |          |

|     |                                                            |            |      |          |          |
|-----|------------------------------------------------------------|------------|------|----------|----------|
| 950 | Collagen Type III Alpha 1 Chain                            | COL3A1     |      | GeneCard | DisGenet |
| 951 | Collagen Type IV Alpha 1 Chain                             | COL4A1     | OMIM | GeneCard | DisGenet |
| 952 | Collagen Type IV Alpha 2 Chain                             | COL4A2     |      | GeneCard |          |
| 953 | COL4A2 Antisense RNA 2                                     | COL4A2-AS2 |      | GeneCard |          |
| 954 | Collagen Type IV Alpha 3 Chain                             | COL4A3     |      | GeneCard |          |
| 955 | Collagen Type IV Alpha 4 Chain                             | COL4A4     |      | GeneCard |          |
| 956 | Collagen Type V Alpha 1 Chain                              | COL5A1     |      | GeneCard |          |
| 957 | Collagen Type V Alpha 2 Chain                              | COL5A2     |      | GeneCard |          |
| 958 | Collagen Type V Alpha 3 Chain                              | COL5A3     |      | GeneCard |          |
| 959 | Collagen Type VI Alpha 1 Chain                             | COL6A1     |      | GeneCard |          |
| 960 | Collagen Type VIII Alpha 1 Chain                           | COL8A1     |      | GeneCard |          |
| 961 | Collectin Subfamily Member 10                              | COLEC10    |      | GeneCard |          |
| 962 | Collectin Subfamily Member 12                              | COLEC12    |      | GeneCard | DisGenet |
| 963 | COMM Domain Containing 10                                  | COMMD10    |      | GeneCard |          |
| 964 | COMM Domain Containing 6                                   | COMMD6     |      | GeneCard |          |
| 965 | Cartilage Oligomeric Matrix Protein                        | COMP       |      | GeneCard | DisGenet |
| 966 | Catechol-O-Methyltransferase                               | COMT       |      | GeneCard | DisGenet |
| 967 | COPI coat complex subunit beta 2                           | COPB2      |      |          | DisGenet |
| 968 | Pulmonary disease, chronic obstructive, severe early-onset | COPD       |      |          | DisGenet |
| 969 | COPI coat complex subunit epsilon                          | COPE       |      |          | DisGenet |
| 970 | COP9 Signalosome Subunit 2                                 | COPS2      |      | GeneCard |          |
| 971 | COP9 Signalosome Subunit 5                                 | COPS5      |      | GeneCard | DisGenet |
| 972 | Coenzyme Q10A                                              | COQ10A     |      | GeneCard |          |
| 973 | Corin, Serine Peptidase                                    | CORIN      |      | GeneCard |          |
| 974 | Coronin 1B                                                 | CORO1B     |      | GeneCard |          |
| 975 | Cortistatin                                                | CORT       |      | GeneCard | DisGenet |
| 976 | Cytochrome C Oxidase Subunit I                             | COX1       |      |          | DisGenet |
| 977 | Cytochrome C Oxidase Copper Chaperone COX17                | COX17      |      | GeneCard |          |
| 978 | Cytochrome C Oxidase Subunit II                            | COX2       |      |          | DisGenet |

|      |                                                       |       |      |          |          |
|------|-------------------------------------------------------|-------|------|----------|----------|
| 979  | Cytochrome C Oxidase Subunit 5A                       | COX5A |      | GeneCard | DisGenet |
| 980  | Cytochrome C Oxidase Subunit 8A                       | COX8A |      |          | DisGenet |
| 981  | Ceruloplasmin                                         | CP    |      | GeneCard | DisGenet |
| 982  | Carboxypeptidase A1                                   | CPA1  |      | GeneCard |          |
| 983  | Carboxypeptidase A3                                   | CPA3  |      | GeneCard |          |
| 984  | Carboxypeptidase A6                                   | CPA6  |      | GeneCard |          |
| 985  | Cerebral Palsy, Ataxic 1                              | CPAT1 |      |          | DisGenet |
| 986  | Carboxypeptidase B1                                   | CPB1  |      | GeneCard |          |
| 987  | Carboxypeptidase B2                                   | CPB2  |      | GeneCard | DisGenet |
| 988  | Carboxypeptidase E                                    | CPE   |      | GeneCard |          |
| 989  | Cytoplasmic Polyadenylation Element Binding Protein 1 | CPEB1 |      | GeneCard |          |
| 990  | Cytoplasmic Polyadenylation Element Binding Protein 2 | CPEB2 |      | GeneCard |          |
| 991  | Copine 1                                              | CPNE1 |      | GeneCard |          |
| 992  | Carboxypeptidase O                                    | CPO   |      | GeneCard |          |
| 993  | Coproporphyrinogen Oxidase                            | CPOX  |      | GeneCard | DisGenet |
| 994  | Carboxypeptidase Q                                    | CPQ   |      | GeneCard |          |
| 995  | Carbamoyl-Phosphate Synthase 1                        | CPS1  | OMIM | GeneCard |          |
| 996  | Carnitine Palmitoyltransferase 1A                     | CPT1A |      | GeneCard |          |
| 997  | Carnitine Palmitoyltransferase 2                      | CPT2  |      | GeneCard | DisGenet |
| 998  | Ceramide-1-Phosphate Transfer Protein                 | CPTP  |      | GeneCard |          |
| 999  | Complement C3b/C4b Receptor 1 (Knops Blood Group)     | CR1   |      | GeneCard | DisGenet |
| 1000 | Complement C3d Receptor 2                             | CR2   |      | GeneCard |          |
| 1001 | Carnitine O-Acetyltransferase                         | CRAT  |      | GeneCard |          |
| 1002 | Crumbs Cell Polarity Complex Component 1              | CRB1  |      | GeneCard |          |
| 1003 | CAMP Responsive Element Binding Protein 1             | CREB1 |      | GeneCard | DisGenet |
| 1004 | CAMP Responsive Element Binding Protein 3             | CREB3 |      | GeneCard | DisGenet |

|      |                                                  |         |      |          |          |
|------|--------------------------------------------------|---------|------|----------|----------|
| 1005 | CAMP Responsive Element Binding Protein 3 Like 3 | CREB3L3 |      | GeneCard | DisGenet |
| 1006 | CREB Binding Protein                             | CREBBP  |      | GeneCard |          |
| 1007 | Cellular Repressor Of E1A Stimulated Genes 1     | CREG1   | OMIM | GeneCard | DisGenet |
| 1008 | CAMP Responsive Element Modulator                | CREM    |      | GeneCard |          |
| 1009 | Corticotropin Releasing Hormone                  | CRH     |      | GeneCard |          |
| 1010 | Cysteine Rich Secretory Protein 2                | CRISP2  |      | GeneCard | DisGenet |
| 1011 | CRK proto-oncogene, adaptor protein              | CRK     |      |          | DisGenet |
| 1012 | Cytokine Receptor Like Factor 2                  | CRLF2   |      | GeneCard |          |
| 1013 | Collapsin Response Mediator Protein 1            | CRMP1   |      |          | DisGenet |
| 1014 | Crooked Neck Pre-mRNA Splicing Factor 1          | CRNKL1  |      | GeneCard |          |
| 1015 | Ciliary Rootlet Coiled-Coil, Rootletin           | CROCC   |      | GeneCard |          |
| 1016 | Carnitine O-Octanoyltransferase                  | CROT    |      | GeneCard |          |
| 1017 | C-Reactive Protein                               | CRP     | OMIM | GeneCard | DisGenet |
| 1018 | CRTC1 Pseudogene 1                               | CRTC1P1 |      | GeneCard |          |
| 1019 | Cryptochrome Circadian Regulator 1               | CRY1    |      | GeneCard | DisGenet |
| 1020 | Cryptochrome Circadian Regulator 2               | CRY2    |      | GeneCard |          |
| 1021 | Crystallin Alpha A                               | CRYAA   |      | GeneCard |          |
| 1022 | Crystallin Alpha B                               | CRYAB   |      | GeneCard |          |
| 1023 | Crystallin Gamma D                               | CRYGD   |      |          | DisGenet |
| 1024 | Citrate Synthase                                 | CS      |      | GeneCard |          |

|          |                                                         |            |      |          |          |
|----------|---------------------------------------------------------|------------|------|----------|----------|
| 102<br>5 | Chromosome Segregation 1 Like                           | CSE1L      |      | GeneCard |          |
| 102<br>6 | Colony Stimulating Factor 1                             | CSF1       | OMIM | GeneCard | DisGenet |
| 102<br>7 | Colony Stimulating Factor 1 Receptor                    | CSF1R      |      | GeneCard | DisGenet |
| 102<br>8 | Colony Stimulating Factor 2                             | CSF2       |      | GeneCard | DisGenet |
| 102<br>9 | Colony Stimulating Factor 2 Receptor Subunit Alpha      | CSF2RA     |      | GeneCard |          |
| 103<br>0 | Colony Stimulating Factor 2 Receptor Subunit Beta       | CSF2RB     |      | GeneCard | DisGenet |
| 103<br>1 | Colony Stimulating Factor 3                             | CSF3       |      | GeneCard | DisGenet |
| 103<br>2 | Colony Stimulating Factor 3 Receptor                    | CSF3R      |      | GeneCard |          |
| 103<br>3 | Chondroitin Sulfate N-Acetylgalactosaminyltransferase 1 | CSGALNACT1 |      | GeneCard |          |
| 103<br>4 | Chondroitin Sulfate N-Acetylgalactosaminyltransferase 2 | CSGALNACT2 |      | GeneCard | DisGenet |
| 103<br>5 | C-Terminal Src Kinase                                   | CSK        |      | GeneCard |          |
| 103<br>6 | CUB and Sushi Multiple Domains 1                        | CSMD1      |      | GeneCard |          |
| 103<br>7 | CUB and Sushi Multiple Domains 2                        | CSMD2      |      | GeneCard |          |
| 103<br>8 | CUB and Sushi Multiple Domains 3                        | CSMD3      |      | GeneCard |          |
| 103<br>9 | Casein Alpha S1                                         | CSN1S1     |      | GeneCard |          |
| 104<br>0 | Casein Kinase 2 Alpha 1                                 | CSNK2A1    |      | GeneCard |          |
| 104<br>1 | Casein Kinase 2 Alpha 2                                 | CSNK2A2    |      | GeneCard |          |
| 104<br>2 | Casein Kinase 2 Beta                                    | CSNK2B     |      | GeneCard |          |
| 104<br>3 | Cysteine And Glycine Rich Protein 1                     | CSR1P      |      | GeneCard |          |
| 104<br>4 | Cysteine And Glycine Rich Protein 3                     | CSR3P      |      | GeneCard |          |

|          |                                             |          |  |          |          |
|----------|---------------------------------------------|----------|--|----------|----------|
| 104<br>5 | Cystatin 12, Pseudogene                     | CST12P   |  |          | DisGenet |
| 104<br>6 | Cystatin C                                  | CST3     |  | GeneCard | DisGenet |
| 104<br>7 | Cystatin S                                  | CST4     |  | GeneCard |          |
| 104<br>8 | Cystatin A                                  | CSTA     |  | GeneCard |          |
| 104<br>9 | Cystatin B                                  | CSTB     |  | GeneCard |          |
| 105<br>0 | Cleavage Stimulation Factor Subunit 3       | CSTF3    |  | GeneCard |          |
| 105<br>1 | Chitobiase                                  | CTBS     |  |          | DisGenet |
| 105<br>2 | CCCTC-Binding Factor                        | CTCF     |  | GeneCard | DisGenet |
| 105<br>3 | Cardiotrophin 1                             | CTF1     |  | GeneCard | DisGenet |
| 105<br>4 | Cystathionine Gamma-Lyase                   | CTH      |  | GeneCard | DisGenet |
| 105<br>5 | Cytotoxic T-Lymphocyte Associated Protein 4 | CTLA4    |  | GeneCard |          |
| 105<br>6 | Catenin Alpha 1                             | CTNNA1   |  | GeneCard |          |
| 105<br>7 | Catenin Alpha 2                             | CTNNA2   |  | GeneCard |          |
| 105<br>8 | Catenin Alpha 3                             | CTNNA3   |  | GeneCard |          |
| 105<br>9 | Catenin Beta 1                              | CTNNB1   |  | GeneCard | DisGenet |
| 106<br>0 | Catenin Beta Interacting Protein 1          | CTNNBIP1 |  | GeneCard |          |
| 106<br>1 | Catenin delta 1                             | CTNND1   |  |          | DisGenet |
| 106<br>2 | Catenin Delta 2                             | CTNND2   |  | GeneCard |          |
| 106<br>3 | Cystinosin, Lysosomal Cystine Transporter   | CTNS     |  | GeneCard |          |
| 106<br>4 | CTP synthase 1                              | CTPS1    |  |          | DisGenet |

|          |                                              |        |  |          |          |
|----------|----------------------------------------------|--------|--|----------|----------|
| 106<br>5 | Chymotrypsin C                               | CTRC   |  | GeneCard |          |
| 106<br>6 | Chymotrypsin Like                            | CTRL   |  | GeneCard |          |
| 106<br>7 | Cathepsin A                                  | CTSA   |  | GeneCard |          |
| 106<br>8 | Cathepsin B                                  | CTSB   |  | GeneCard | DisGenet |
| 106<br>9 | Cathepsin C                                  | CTSC   |  | GeneCard | DisGenet |
| 107<br>0 | Cathepsin D                                  | CTSD   |  | GeneCard | DisGenet |
| 107<br>1 | Cathepsin F                                  | CTSF   |  | GeneCard |          |
| 107<br>2 | Cathepsin G                                  | CTSG   |  | GeneCard | DisGenet |
| 107<br>3 | Cathepsin H                                  | CTSH   |  | GeneCard |          |
| 107<br>4 | Cathepsin K                                  | CTSK   |  | GeneCard | DisGenet |
| 107<br>5 | Cathepsin L                                  | CTSL   |  | GeneCard | DisGenet |
| 107<br>6 | Cathepsin S                                  | CTSS   |  | GeneCard | DisGenet |
| 107<br>7 | Cathepsin V                                  | CTSV   |  | GeneCard |          |
| 107<br>8 | Cortactin                                    | CTTN   |  | GeneCard |          |
| 107<br>9 | Cubilin                                      | CUBN   |  | GeneCard |          |
| 108<br>0 | Cullin 4A                                    | CUL4A  |  | GeneCard |          |
| 108<br>1 | Cullin 4B                                    | CUL4B  |  | GeneCard |          |
| 108<br>2 | Cullin 5                                     | CUL5   |  | GeneCard |          |
| 108<br>3 | CWC22 Spliceosome Associated Protein Homolog | CWC22  |  | GeneCard |          |
| 108<br>4 | C-X3-C Motif Chemokine Ligand 1              | CX3CL1 |  | GeneCard | DisGenet |



|      |                                                               |         |      |          |          |
|------|---------------------------------------------------------------|---------|------|----------|----------|
| 1085 | Chemokine (C-X3-C) receptor 1 (G protein-coupled receptor-13) | CX3CR1  | OMIM | GeneCard | DisGenet |
| 1086 | CXADR Ig-Like Cell Adhesion Molecule                          | CXADR   |      | GeneCard | DisGenet |
| 1087 | CXADRP1                                                       | CXADRP1 |      |          | DisGenet |
| 1088 | C-X-C Motif Chemokine Ligand 1                                | CXCL1   |      | GeneCard | DisGenet |
| 1089 | C-X-C Motif Chemokine Ligand 10                               | CXCL10  |      | GeneCard | DisGenet |
| 1090 | C-X-C Motif Chemokine Ligand 11                               | CXCL11  |      | GeneCard |          |
| 1091 | C-X-C Motif Chemokine Ligand 12                               | CXCL12  |      | GeneCard | DisGenet |
| 1092 | C-X-C Motif Chemokine Ligand 13                               | CXCL13  |      | GeneCard | DisGenet |
| 1093 | C-X-C Motif Chemokine Ligand 14                               | CXCL14  |      | GeneCard | DisGenet |
| 1094 | C-X-C Motif Chemokine Ligand 16                               | CXCL16  |      | GeneCard | DisGenet |
| 1095 | C-X-C Motif Chemokine Ligand 17                               | CXCL17  |      | GeneCard |          |
| 1096 | C-X-C Motif Chemokine Ligand 2                                | CXCL2   |      | GeneCard | DisGenet |
| 1097 | C-X-C Motif Chemokine Ligand 3                                | CXCL3   |      | GeneCard |          |
| 1098 | C-X-C Motif Chemokine Ligand 5                                | CXCL5   |      | GeneCard |          |
| 1099 | C-X-C Motif Chemokine Ligand 6                                | CXCL6   |      | GeneCard |          |
| 1100 | C-X-C Motif Chemokine Ligand 8                                | CXCL8   |      | GeneCard | DisGenet |
| 1101 | C-X-C Motif Chemokine Ligand 9                                | CXCL9   |      | GeneCard | DisGenet |
| 1102 | C-X-C Motif Chemokine Receptor 1                              | CXCR1   |      | GeneCard |          |
| 1103 | C-X-C Motif Chemokine Receptor 2                              | CXCR2   |      | GeneCard | DisGenet |
| 1104 | C-X-C Motif Chemokine Receptor 3                              | CXCR3   |      | GeneCard | DisGenet |

|          |                                                |         |  |          |          |
|----------|------------------------------------------------|---------|--|----------|----------|
| 110<br>5 | C-X-C Motif Chemokine Receptor 4               | CXCR4   |  | GeneCard | DisGenet |
| 110<br>6 | C-X-C Motif Chemokine Receptor 5               | CXCR5   |  | GeneCard |          |
| 110<br>7 | C-X-C Motif Chemokine Receptor 6               | CXCR6   |  | GeneCard | DisGenet |
| 110<br>8 | Chromosome X Open Reading Frame 38             | CXorf38 |  | GeneCard |          |
| 110<br>9 | Chromosome X Open Reading Frame 49             | CXorf49 |  | GeneCard |          |
| 111<br>0 | Cytochrome B-245 Alpha Chain                   | CYBA    |  | GeneCard | DisGenet |
| 111<br>1 | Cytochrome B-245 Beta Chain                    | CYBB    |  | GeneCard | DisGenet |
| 111<br>2 | Cytochrome C, Somatic                          | CYCS    |  | GeneCard |          |
| 111<br>3 | CYCS Pseudogene 14                             | CYCSP14 |  | GeneCard |          |
| 111<br>4 | CYCS Pseudogene 42                             | CYCSP42 |  | GeneCard |          |
| 111<br>5 | CYCS Pseudogene 8                              | CYCSP8  |  | GeneCard |          |
| 111<br>6 | Cytoglobin                                     | CYGB    |  | GeneCard | DisGenet |
| 111<br>7 | CYLD Lysine 63 Deubiquitinase                  | CYLD    |  | GeneCard | DisGenet |
| 111<br>8 | Cytochrome P450 Family 11 Subfamily A Member 1 | CYP11A1 |  | GeneCard |          |
| 111<br>9 | Cytochrome P450 Family 11 Subfamily B Member 2 | CYP11B2 |  | GeneCard |          |
| 112<br>0 | Cytochrome P450 Family 17 Subfamily A Member 1 | CYP17A1 |  | GeneCard |          |
| 112<br>1 | Cytochrome P450 Family 19 Subfamily A Member 1 | CYP19A1 |  | GeneCard | DisGenet |
| 112<br>2 | Cytochrome P450 Family 1 Subfamily A Member 1  | CYP1A1  |  | GeneCard | DisGenet |
| 112<br>3 | Cytochrome P450 Family 1 Subfamily A Member 2  | CYP1A2  |  | GeneCard | DisGenet |
| 112<br>4 | Cytochrome P450 Family 1 Subfamily B Member 1  | CYP1B1  |  | GeneCard |          |

|          |                                                |         |      |          |          |
|----------|------------------------------------------------|---------|------|----------|----------|
| 112<br>5 | Cytochrome P450 Family 20 Subfamily A Member 1 | CYP20A1 |      | GeneCard |          |
| 112<br>6 | Cytochrome P450 Family 21 Subfamily A Member 2 | CYP21A2 |      | GeneCard |          |
| 112<br>7 | Cytochrome P450 Family 24 Subfamily A Member 1 | CYP24A1 |      | GeneCard |          |
| 112<br>8 | Cytochrome P450 Family 26 Subfamily A Member 1 | CYP26A1 |      |          | DisGenet |
| 112<br>9 | Cytochrome P450 Family 26 Subfamily B Member 1 | CYP26B1 |      | GeneCard | DisGenet |
| 113<br>0 | Cytochrome P450 Family 27 Subfamily B Member 1 | CYP27A1 | OMIM | GeneCard | DisGenet |
| 113<br>1 | Cytochrome P450 Family 27 Subfamily B Member 1 | CYP27B1 |      | GeneCard | DisGenet |
| 113<br>2 | Cytochrome P450 Family 27 Subfamily C Member 1 | CYP27C1 |      | GeneCard |          |
| 113<br>3 | Cytochrome P450 Family 2 Subfamily B Member 6  | CYP2B6  |      | GeneCard | DisGenet |
| 113<br>4 | Cytochrome P450 Family 2 Subfamily C Member 19 | CYP2C19 |      | GeneCard | DisGenet |
| 113<br>5 | Cytochrome P450 Family 2 Subfamily C Member 8  | CYP2C8  |      | GeneCard | DisGenet |
| 113<br>6 | Cytochrome P450 Family 2 Subfamily C Member 9  | CYP2C9  |      | GeneCard | DisGenet |
| 113<br>7 | Cytochrome P450 Family 2 Subfamily D Member 6  | CYP2D6  |      |          | DisGenet |
| 113<br>8 | Cytochrome P450 Family 2 Subfamily E Member 1  | CYP2E1  |      | GeneCard | DisGenet |
| 113<br>9 | Cytochrome P450 Family 2 Subfamily J Member 2  | CYP2J2  |      | GeneCard | DisGenet |
| 114<br>0 | Cytochrome P450 Family 2 Subfamily R Member 1  | CYP2R1  |      | GeneCard |          |
| 114<br>1 | Cytochrome P450 Family 3 Subfamily A Member 4  | CYP3A4  |      | GeneCard | DisGenet |
| 114<br>2 | Cytochrome P450 Family 3 Subfamily A Member 5  | CYP3A5  |      | GeneCard | DisGenet |
| 114<br>3 | Cytochrome P450 Family 46 Subfamily A Member 1 | CYP46A1 |      | GeneCard |          |
| 114<br>4 | Cytochrome P450 Family 4 Subfamily A Member 11 | CYP4A11 |      | GeneCard |          |

|          |                                                     |           |  |          |          |
|----------|-----------------------------------------------------|-----------|--|----------|----------|
| 114<br>5 | Cytochrome P450 Family 4 Subfamily F Member 2       | CYP4F2    |  | GeneCard | DisGenet |
| 114<br>6 | Cytochrome P450 Family 4 Subfamily V Member 2       | CYP4V2    |  | GeneCard |          |
| 114<br>7 | Cytochrome P450 Family 51 Subfamily A Member 1      | CYP51A1   |  | GeneCard |          |
| 114<br>8 | Cytochrome P450 Family 7 Subfamily A Member 1       | CYP7A1    |  | GeneCard | DisGenet |
| 114<br>9 | Cytochrome P450 Family 7 Subfamily B Member 1       | CYP7B1    |  | GeneCard |          |
| 115<br>0 | Cytochrome P450 Family 8 Subfamily B Member 1       | CYP8B1    |  | GeneCard |          |
| 115<br>1 | Cysteinyl Leukotriene Receptor 1                    | CYSLTR1   |  | GeneCard | DisGenet |
| 115<br>2 | Cysteinyl Leukotriene Receptor 2                    | CYSLTR2   |  | GeneCard |          |
| 115<br>3 | Cytochrome B                                        | CYTB      |  |          | DisGenet |
| 115<br>4 | DAB Adaptor Protein 2                               | DAB2      |  | GeneCard | DisGenet |
| 115<br>5 | DAB2 Interacting Protein                            | DAB2IP    |  | GeneCard | DisGenet |
| 115<br>6 | Dachshund Family Transcription Factor 2             | DACH2     |  | GeneCard |          |
| 115<br>7 | Dystroglycan 1                                      | DAG1      |  | GeneCard | DisGenet |
| 115<br>8 | Diacylglycerol Lipase Beta                          | DAGLB     |  | GeneCard |          |
| 115<br>9 | Differentiation Antagonizing Non-Protein Coding RNA | DANCR     |  | GeneCard |          |
| 116<br>0 | D-Amino Acid Oxidase Activator                      | DAOA      |  | GeneCard |          |
| 116<br>1 | Death Associated Protein                            | DAP       |  | GeneCard |          |
| 116<br>2 | Death Associated Protein Kinase 1                   | DAPK1     |  | GeneCard |          |
| 116<br>3 | DAPK1 Intronic Transcript 1                         | DAPK1-IT1 |  | GeneCard |          |
| 116<br>4 | Death Associated Protein Kinase 2                   | DAPK2     |  |          | DisGenet |

|          |                                                      |        |  |          |          |
|----------|------------------------------------------------------|--------|--|----------|----------|
| 116<br>5 | Death Associated Protein Kinase 3                    | DAPK3  |  | GeneCard |          |
| 116<br>6 | Death Domain Associated Protein                      | DAXX   |  | GeneCard |          |
| 116<br>7 | Deleted In Azoospermia Like                          | DAZL   |  | GeneCard |          |
| 116<br>8 | Diazepam Binding Inhibitor, Acyl-CoA Binding Protein | DBI    |  | GeneCard |          |
| 116<br>9 | Drebrin 1                                            | DBN1   |  | GeneCard | DisGenet |
| 117<br>0 | D-box binding PAR bZIP transcription factor          | DBP    |  |          | DisGenet |
| 117<br>1 | Discoidin, CUB And LCCL Domain Containing 1          | DCBLD1 |  | GeneCard |          |
| 117<br>2 | Dermcidin                                            | DCD    |  | GeneCard |          |
| 117<br>3 | Doublecortin Domain Containing 2C                    | DCDC2C |  | GeneCard |          |
| 117<br>4 | Doublecortin Like Kinase 3                           | DCLK3  |  |          | DisGenet |
| 117<br>5 | Decorin                                              | DCN    |  | GeneCard | DisGenet |
| 117<br>6 | Dynactin Subunit 4                                   | DCTN4  |  |          | DisGenet |
| 117<br>7 | Dynactin Subunit 6                                   | DCTN6  |  |          | DisGenet |
| 117<br>8 | Dimethylarginine Dimethylaminohydrolase 1            | DDAH1  |  | GeneCard | DisGenet |
| 117<br>9 | Dimethylarginine Dimethylaminohydrolase 2            | DDAH2  |  | GeneCard | DisGenet |
| 118<br>0 | Damage Specific DNA Binding Protein 1                | DDB1   |  | GeneCard |          |
| 118<br>1 | Damage Specific DNA Binding Protein 2                | DDB2   |  | GeneCard |          |
| 118<br>2 | Dopa Decarboxylase                                   | DDC    |  | GeneCard |          |
| 118<br>3 | DDHD Domain Containing 1                             | DDHD1  |  | GeneCard |          |
| 118<br>4 | DNA Damage Inducible Transcript 3                    | DDIT3  |  | GeneCard | DisGenet |

|          |                                                    |          |  |          |          |
|----------|----------------------------------------------------|----------|--|----------|----------|
| 118<br>5 | DNA Damage Inducible Transcript 4 Like             | DDIT4L   |  | GeneCard |          |
| 118<br>6 | Discoidin Domain Receptor Tyrosine Kinase 1        | DDR1     |  | GeneCard | DisGenet |
| 118<br>7 | Discoidin Domain Receptor Tyrosine Kinase 2        | DDR2     |  | GeneCard | DisGenet |
| 118<br>8 | DEAD-Box Helicase 4                                | DDX4     |  | GeneCard |          |
| 118<br>9 | DExH/H-Box Helicase 58                             | DDX58    |  | GeneCard |          |
| 119<br>0 | 2,4-dienoyl-CoA reductase 1                        | DECR1    |  |          | DisGenet |
| 119<br>1 | Defensin Alpha 1                                   | DEFA1    |  | GeneCard |          |
| 119<br>2 | Defensin Alpha 3                                   | DEFA3    |  | GeneCard |          |
| 119<br>3 | Defensin Beta 103A                                 | DEFB103A |  |          | DisGenet |
| 119<br>4 | Defensin Beta 103B                                 | DEFB103B |  | GeneCard | DisGenet |
| 119<br>5 | Defensin Beta 128                                  | DEFB128  |  | GeneCard |          |
| 119<br>6 | Defensin Beta 4A                                   | DEFB4A   |  | GeneCard | DisGenet |
| 119<br>7 | Defensin Beta 4B                                   | DEFB4B   |  |          | DisGenet |
| 119<br>8 | Delta 4-Desaturase, Sphingolipid 1                 | DEGS1    |  | GeneCard |          |
| 119<br>9 | Density Regulated Re-initiation and Release Factor | DENR     |  |          | DisGenet |
| 120<br>0 | Desmin                                             | DES      |  | GeneCard |          |
| 120<br>1 | Deuterosome Assembly Protein 1                     | DEUP1    |  | GeneCard |          |
| 120<br>2 | DNA Fragmentation Factor Subunit Beta              | DFFB     |  | GeneCard |          |
| 120<br>3 | Diacylglycerol O-Acyltransferase 1                 | DGAT1    |  | GeneCard | DisGenet |
| 120<br>4 | Diacylglycerol O-Acyltransferase 2                 | DGAT2    |  | GeneCard |          |

|          |                                                       |          |  |          |          |
|----------|-------------------------------------------------------|----------|--|----------|----------|
| 120<br>5 | Diacylglycerol O-Acyltransferase 2 Like 6             | DGAT2L6  |  | GeneCard |          |
| 120<br>6 | Diacylglycerol O-Acyltransferase 2 Like 7, Pseudogene | DGAT2L7P |  | GeneCard |          |
| 120<br>7 | Diacylglycerol Kinase Alpha                           | DGKA     |  | GeneCard |          |
| 120<br>8 | Diacylglycerol Kinase Epsilon                         | DGKE     |  | GeneCard |          |
| 120<br>9 | Diacylglycerol Kinase Eta                             | DGKH     |  | GeneCard |          |
| 121<br>0 | Diacylglycerol Kinase Theta                           | DGKQ     |  | GeneCard |          |
| 121<br>1 | 24-Dehydrocholesterol Reductase                       | DHCR24   |  | GeneCard | DisGenet |
| 121<br>2 | 7-Dehydrocholesterol Reductase                        | DHCR7    |  | GeneCard | DisGenet |
| 121<br>3 | Dihydrofolate Reductase                               | DHFR     |  | GeneCard |          |
| 121<br>4 | DEAH-Box Helicase 15                                  | DHX15    |  | GeneCard |          |
| 121<br>5 | DEAH-Box Helicase 38                                  | DHX38    |  | GeneCard |          |
| 121<br>6 | DEAH-box helicase 40                                  | DHX40    |  |          | DisGenet |
| 121<br>7 | DExH-Box Helicase 9                                   | DHX9     |  | GeneCard |          |
| 121<br>8 | Diablo IAP-Binding Mitochondrial Protein              | DIABLO   |  | GeneCard |          |
| 121<br>9 | Diaphanous Related Formin 1                           | DIAPH1   |  | GeneCard |          |
| 122<br>0 | Diaphanous Related Formin 2                           | DIAPH2   |  | GeneCard |          |
| 122<br>1 | Dicer 1, Ribonuclease III                             | DICER1   |  | GeneCard |          |
| 122<br>2 | Iodothyronine Deiodinase 2                            | DIO2     |  | GeneCard | DisGenet |
| 122<br>3 | Disco Interacting Protein 2 Homolog A                 | DIP2A    |  | GeneCard |          |
| 122<br>4 | Dickkopf WNT Signaling Pathway Inhibitor 1            | DKK1     |  | GeneCard | DisGenet |

|          |                                                    |        |  |          |          |
|----------|----------------------------------------------------|--------|--|----------|----------|
| 122<br>5 | Dickkopf WNT Signaling Pathway Inhibitor 3         | DKK3   |  | GeneCard | DisGenet |
| 122<br>6 | DLC1 Rho GTPase Activating Protein                 | DLC1   |  | GeneCard | DisGenet |
| 122<br>7 | Dihydrolipoamide Dehydrogenase                     | DLD    |  |          | DisGenet |
| 122<br>8 | DLEC1 Cilia and Flagella Associated Protein        | DLEC1  |  |          | DisGenet |
| 122<br>9 | Deleted In Lymphocytic Leukemia 1                  | DLEU1  |  | GeneCard |          |
| 123<br>0 | Deleted In Lymphocytic Leukemia 7                  | DLEU7  |  | GeneCard |          |
| 123<br>1 | Discs Large MAGUK Scaffold Protein 2               | DLG2   |  | GeneCard |          |
| 123<br>2 | DLG Associated Protein 1                           | DLGAP1 |  | GeneCard |          |
| 123<br>3 | Delta Like Canonical Notch Ligand 4                | DLL4   |  | GeneCard | DisGenet |
| 123<br>4 | Distal-Less Homeobox 5                             | DLX5   |  | GeneCard |          |
| 123<br>5 | Distal Membrane Arm Assembly Component 2 Like      | DMAC2L |  | GeneCard |          |
| 123<br>6 | DNA Meiotic Recombinase 1                          | DMC1   |  | GeneCard |          |
| 123<br>7 | Dystrophin                                         | DMD    |  | GeneCard | DisGenet |
| 123<br>8 | Dentin Matrix Acidic Phosphoprotein 1              | DMP1   |  | GeneCard |          |
| 123<br>9 | DM1 Protein Kinase                                 | DMPK   |  | GeneCard |          |
| 124<br>0 | Doublesex And Mab-3 Related Transcription Factor 1 | DMRT1  |  | GeneCard | DisGenet |
| 124<br>1 | Doublesex And Mab-3 Related Transcription Factor 3 | DMRT3  |  | GeneCard |          |
| 124<br>2 | DMRT Like Family A1                                | DMRTA1 |  | GeneCard |          |
| 124<br>3 | DM1 Locus, WD Repeat Containing                    | DMWD   |  | GeneCard |          |
| 124<br>4 | Dynein Axonemal Heavy Chain 10                     | DNAH10 |  | GeneCard |          |



|          |                                                   |          |      |          |          |
|----------|---------------------------------------------------|----------|------|----------|----------|
| 124<br>5 | Dynein Axonemal Heavy Chain 5                     | DNAH5    |      | GeneCard |          |
| 124<br>6 | Dynein Axonemal Heavy Chain 8                     | DNAH8    |      | GeneCard | DisGenet |
| 124<br>7 | Dynein Axonemal Heavy Chain 9                     | DNAH9    |      | GeneCard |          |
| 124<br>8 | DnaJ Heat Shock Protein Family (Hsp40) Member C19 | DNAJC19  |      | GeneCard |          |
| 124<br>9 | Deoxyribonuclease 1                               | DNASE1   |      | GeneCard | DisGenet |
| 125<br>0 | Deoxyribonuclease 1 Like 3                        | DNASE1L3 |      | GeneCard |          |
| 125<br>1 | Delta/Notch Like EGF Repeat                       | DNER     |      |          | DisGenet |
| 125<br>2 | Dynamin 1 Like                                    | DNM1L    |      | GeneCard | DisGenet |
| 125<br>3 | Dynamin 2                                         | DNM2     |      | GeneCard |          |
| 125<br>4 | Dynamin 3                                         | DNM3     |      | GeneCard |          |
| 125<br>5 | DNA Methyltransferase 1                           | DNMT1    |      | GeneCard | DisGenet |
| 125<br>6 | DNA Methyltransferase 3 Alpha                     | DNMT3A   |      | GeneCard |          |
| 125<br>7 | DNA Methyltransferase 3 Beta                      | DNMT3B   |      | GeneCard | DisGenet |
| 125<br>8 | Dedicator Of Cytokinesis 1                        | DOCK1    |      | GeneCard |          |
| 125<br>9 | Dedicator Of Cytokinesis 2                        | DOCK2    |      | GeneCard |          |
| 126<br>0 | Dedicator Of Cytokinesis 4                        | DOCK4    | OMIM | GeneCard | DisGenet |
| 126<br>1 | Dedicator Of Cytokinesis 6                        | DOCK6    |      | GeneCard |          |
| 126<br>2 | Dedicator Of Cytokinesis 7                        | DOCK7    |      | GeneCard |          |
| 126<br>3 | Dedicator Of Cytokinesis 9                        | DOCK9    |      | GeneCard |          |
| 126<br>4 | Dolichol Kinase                                   | DOLK     |      | GeneCard |          |

|          |                                                              |          |  |          |          |
|----------|--------------------------------------------------------------|----------|--|----------|----------|
| 126<br>5 | DOT1 Like Histone Lysine Methyltransferase                   | DOT1L    |  | GeneCard |          |
| 126<br>6 | Diphthamide Biosynthesis 3                                   | DPH3     |  | GeneCard |          |
| 126<br>7 | Dolichyl-Phosphate Mannosyltransferase Subunit 3, Regulatory | DPM3     |  | GeneCard |          |
| 126<br>8 | Dipeptidyl Peptidase 4                                       | DPP4     |  | GeneCard | DisGenet |
| 126<br>9 | Dipeptidyl Peptidase 8                                       | DPP8     |  | GeneCard | DisGenet |
| 127<br>0 | Dipeptidyl Peptidase 9                                       | DPP9     |  | GeneCard | DisGenet |
| 127<br>1 | Developmental Pluripotency Associated 2                      | DPPA2    |  | GeneCard |          |
| 127<br>2 | Developmental Pluripotency Associated 3                      | DPPA3    |  | GeneCard |          |
| 127<br>3 | Divergent-Paired Related Homeobox Pseudogene 7               | DPRXP7   |  | GeneCard |          |
| 127<br>4 | Dopamine Receptor D2                                         | DRD2     |  | GeneCard |          |
| 127<br>5 | Desmocollin 1                                                | DSC1     |  |          | DisGenet |
| 127<br>6 | Desmocollin 2                                                | DSC2     |  | GeneCard |          |
| 127<br>7 | DS Cell Adhesion Molecule Like 1                             | DSCAML1  |  | GeneCard |          |
| 127<br>8 | Down Syndrome Critical Region 10                             | DSCR10   |  | GeneCard |          |
| 127<br>9 | Desmoglein 2                                                 | DSG2     |  | GeneCard |          |
| 128<br>0 | DSG2 Antisense RNA 1                                         | DSG2-AS1 |  | GeneCard |          |
| 128<br>1 | Desmoplakin                                                  | DSP      |  | GeneCard |          |
| 128<br>2 | Dentin Sialophosphoprotein                                   | DSPP     |  | GeneCard | DisGenet |
| 128<br>3 | Destrin, Actin Depolymerizing Factor                         | DSTN     |  | GeneCard |          |
| 128<br>4 | DTW Domain Containing 1                                      | DTWD1    |  | GeneCard |          |

|          |                                                               |          |  |          |          |
|----------|---------------------------------------------------------------|----------|--|----------|----------|
| 128<br>5 | Dual Oxidase 1                                                | DUOX1    |  | GeneCard |          |
| 128<br>6 | Dual Oxidase 2                                                | DUOX2    |  | GeneCard |          |
| 128<br>7 | Dual Specificity Phosphatase 1                                | DUSP1    |  | GeneCard | DisGenet |
| 128<br>8 | Dual Specificity Phosphatase 16                               | DUSP16   |  | GeneCard |          |
| 128<br>9 | Dual Specificity Phosphatase 19                               | DUSP19   |  | GeneCard |          |
| 129<br>0 | Dual Specificity Phosphatase 2                                | DUSP2    |  | GeneCard |          |
| 129<br>1 | Dual Specificity Phosphatase 5                                | DUSP5    |  |          | DisGenet |
| 129<br>2 | Dual Specificity Phosphatase 6                                | DUSP6    |  | GeneCard |          |
| 129<br>3 | Deoxyuridine Triphosphatase                                   | DUT      |  | GeneCard |          |
| 129<br>4 | Dymeclin                                                      | DYM      |  | GeneCard | DisGenet |
| 129<br>5 | Dynein Cytoplasmic 2 Light Intermediate Chain 1               | DYNC2LI1 |  | GeneCard |          |
| 129<br>6 | Dynein Light Chain LC8-Type 1                                 | DYNLL1   |  |          | DisGenet |
| 129<br>7 | Dual Specificity Tyrosine Phosphorylation Regulated Kinase 1A | DYRK1A   |  | GeneCard |          |
| 129<br>8 | E2F Transcription Factor 1                                    | E2F1     |  | GeneCard |          |
| 129<br>9 | E2F Transcription Factor 3                                    | E2F3     |  | GeneCard |          |
| 130<br>0 | E2F Transcription Factor 8                                    | E2F8     |  | GeneCard |          |
| 130<br>1 | Glutamyl-tRNA Synthetase 2, Mitochondrial                     | EARS2    |  |          | DisGenet |
| 130<br>2 | EBF Transcription Factor 1                                    | EBF1     |  | GeneCard | DisGenet |
| 130<br>3 | Epstein-Barr Virus Induced 3                                  | EBI3     |  | GeneCard | DisGenet |
| 130<br>4 | Endogenous Bornavirus Like Nucleoprotein 1                    | EBLN1    |  | GeneCard |          |

|      |                                                                       |          |  |          |          |
|------|-----------------------------------------------------------------------|----------|--|----------|----------|
| 1305 | EBNA1 binding protein 2                                               | EBNA1BP2 |  |          | DisGenet |
| 1306 | EBP Like                                                              | EBPL     |  | GeneCard |          |
| 1307 | Endothelin Converting Enzyme 1                                        | ECE1     |  | GeneCard | DisGenet |
| 1308 | Endothelin Converting Enzyme 2                                        | ECE2     |  | GeneCard | DisGenet |
| 1309 | Endothelial Cell Surface Expressed Chemotaxis and Apoptosis Regulator | ECSCR    |  |          | DisGenet |
| 1310 | Ectodysplasin A                                                       | EDA      |  |          | DisGenet |
| 1311 | Ectodysplasin A Receptor                                              | EDAR     |  | GeneCard |          |
| 1312 | EDAR Associated Death Domain                                          | EDARADD  |  | GeneCard |          |
| 1313 | ER Degradation Enhancing Alpha-Mannosidase Like Protein 2             | EDEM2    |  | GeneCard |          |
| 1314 | Endothelin 1                                                          | EDN1     |  | GeneCard | DisGenet |
| 1315 | Endothelin 2                                                          | EDN2     |  | GeneCard |          |
| 1316 | Endothelin 3                                                          | EDN3     |  | GeneCard | DisGenet |
| 1317 | Endothelin Receptor Type A                                            | EDNRA    |  | GeneCard | DisGenet |
| 1318 | Endothelin Receptor Type B                                            | EDNRB    |  | GeneCard | DisGenet |
| 1319 | Embryonic Ectoderm Development                                        | EED      |  | GeneCard |          |
| 1320 | Eukaryotic Translation Elongation Factor 1 Alpha 1                    | EEF1A1   |  | GeneCard |          |
| 1321 | Eukaryotic Translation Elongation Factor 1 Beta 2 Pseudogene 2        | EEF1B2P2 |  |          | DisGenet |
| 1322 | Eukaryotic Translation Elongation Factor 1 Epsilon 1                  | EEF1E1   |  | GeneCard |          |
| 1323 | Eukaryotic Elongation Factor 2 Kinase                                 | EEF2K    |  | GeneCard |          |
| 1324 | EGF Containing Fibulin Extracellular Matrix Protein 1                 | EFEMP1   |  | GeneCard |          |

|          |                                                           |                |  |          |          |
|----------|-----------------------------------------------------------|----------------|--|----------|----------|
| 132<br>5 | EGF Containing Fibulin Extracellular Matrix Protein 2     | EFEMP2         |  | GeneCard |          |
| 132<br>6 | Elongation Factor Like GTPase 1                           | EFL1           |  | GeneCard |          |
| 132<br>7 | Ephrin A2                                                 | EFNA2          |  | GeneCard |          |
| 132<br>8 | Ephrin A5                                                 | EFNA5          |  | GeneCard |          |
| 132<br>9 | Ephrin B1                                                 | EFNB1          |  | GeneCard | DisGenet |
| 133<br>0 | Ephrin B2                                                 | EFNB2          |  | GeneCard |          |
| 133<br>1 | Epidermal Growth Factor                                   | EGF            |  | GeneCard | DisGenet |
| 133<br>2 | EGF Like Domain Multiple 7                                | EGFL7          |  | GeneCard | DisGenet |
| 133<br>3 | Epidermal Growth Factor Receptor                          | EGFR           |  | GeneCard | DisGenet |
| 133<br>4 | APOB 3' Scaffold/Matrix Attachment Region                 | EGID-106632268 |  | GeneCard |          |
| 133<br>5 | Egl-9 Family Hypoxia Inducible Factor 3                   | EGLN3          |  |          | DisGenet |
| 133<br>6 | Early Growth Response 1                                   | EGR1           |  | GeneCard | DisGenet |
| 133<br>7 | Early Growth Response 3                                   | EGR3           |  | GeneCard |          |
| 133<br>8 | Euchromatic Histone Lysine Methyltransferase 1            | EHMT1          |  |          | DisGenet |
| 133<br>9 | Euchromatic Histone Lysine Methyltransferase 2            | EHMT2          |  | GeneCard |          |
| 134<br>0 | EP300 Interacting Inhibitor of Differentiation 1          | EID1           |  |          | DisGenet |
| 134<br>1 | Eukaryotic Translation Initiation Factor 2 Alpha Kinase 2 | EIF2AK2        |  | GeneCard |          |
| 134<br>2 | Eukaryotic Translation Initiation Factor 2 Alpha Kinase 3 | EIF2AK3        |  | GeneCard |          |
| 134<br>3 | Eukaryotic Translation Initiation Factor 2B Subunit Beta  | EIF2B2         |  | GeneCard |          |
| 134<br>4 | Eukaryotic Translation Initiation Factor 2B Subunit Delta | EIF2B4         |  | GeneCard |          |

|      |                                                                     |           |      |          |          |
|------|---------------------------------------------------------------------|-----------|------|----------|----------|
| 1345 | Eukaryotic Translation Initiation Factor 2 Subunit Alpha            | EIF2S1    |      | GeneCard |          |
| 1346 | Eukaryotic Translation Initiation Factor 3 Subunit F Pseudogene 3   | EIF3FP3   |      | GeneCard |          |
| 1347 | Eukaryotic Translation Initiation Factor 4B                         | EIF4B     |      | GeneCard |          |
| 1348 | Eukaryotic Translation Initiation Factor 4E                         | EIF4E     |      | GeneCard |          |
| 1349 | Eukaryotic Translation Initiation Factor 4E Binding Protein 1       | EIF4EBP1  |      | GeneCard |          |
| 1350 | Eukaryotic Translation Initiation Factor 4E Nuclear Import Factor 1 | EIF4ENIF1 |      | GeneCard |          |
| 1351 | Eukaryotic Translation Initiation Factor 4 Gamma 2                  | EIF4G2    |      | GeneCard |          |
| 1352 | Eukaryotic Translation Initiation Factor 6                          | EIF6      |      | GeneCard |          |
| 1353 | Elastase, Neutrophil Expressed                                      | ELANE     |      | GeneCard | DisGenet |
| 1354 | ELAV Like RNA Binding Protein 1                                     | ELAVL1    |      | GeneCard | DisGenet |
| 1355 | ELAV like RNA Binding Protein 2                                     | ELAVL2    |      |          | DisGenet |
| 1356 | ETS Transcription Factor ELK1                                       | ELK1      |      | GeneCard | DisGenet |
| 1357 | Engulfment and Cell Motility 1                                      | ELMO1     |      |          | DisGenet |
| 1358 | Elastin                                                             | ELN       | OMIM | GeneCard | DisGenet |
| 1359 | Elongin A                                                           | ELOA      |      | GeneCard |          |
| 1360 | ELOVL Fatty Acid Elongase 2                                         | ELOVL2    |      | GeneCard |          |
| 1361 | ELOVL Fatty Acid Elongase 5                                         | ELOVL5    |      | GeneCard |          |
| 1362 | ELOVL Fatty Acid Elongase 6                                         | ELOVL6    |      |          | DisGenet |
| 1363 | ELOVL Fatty Acid Elongase 7                                         | ELOVL7    |      | GeneCard |          |
| 1364 | ER Membrane Protein Complex Subunit 10                              | EMC10     |      | GeneCard |          |

|          |                                                    |                 |      |          |          |
|----------|----------------------------------------------------|-----------------|------|----------|----------|
| 136<br>5 | Emerin                                             | EMD             |      | GeneCard |          |
| 136<br>6 | EMAP Like 1                                        | EML1            |      | GeneCard |          |
| 136<br>7 | Epithelial Membrane Protein 1                      | EMP1            |      | GeneCard | DisGenet |
| 136<br>8 | Endonuclease G                                     | ENDOG           |      | GeneCard |          |
| 136<br>9 | Endoglin                                           | ENG             | OMIM | GeneCard | DisGenet |
| 137<br>0 | Energy Homeostasis Associated                      | ENHO            |      | GeneCard | DisGenet |
| 137<br>1 | Enolase 1                                          | ENO1            |      | GeneCard |          |
| 137<br>2 | Enolase 2                                          | ENO2            |      | GeneCard |          |
| 137<br>3 | Enolase 3                                          | ENO3            |      | GeneCard |          |
| 137<br>4 | Enolase Superfamily Member 1                       | ENOSF1          |      | GeneCard |          |
| 137<br>5 | Ecto-NOX Disulfide-Thiol Exchanger 1               | ENOX1           |      | GeneCard |          |
| 137<br>6 | Ectonucleotide Pyrophosphatase/Phosphodiesterase 1 | ENPP1           |      | GeneCard | DisGenet |
| 137<br>7 | Ectonucleotide Pyrophosphatase/Phosphodiesterase 2 | ENPP2           |      | GeneCard |          |
| 137<br>8 | Ectonucleotide Pyrophosphatase/Phosphodiesterase 7 | ENPP7           |      | GeneCard | DisGenet |
| 137<br>9 | Novel Transcript, Antisense To STEAP1B             | ENSG00000232949 |      | GeneCard |          |
| 138<br>0 | Novel Transcript, Sense Overlapping CCDC71L        | ENSG00000243797 |      | GeneCard |          |
| 138<br>1 | Novel Transcript                                   | ENSG00000258672 |      | GeneCard |          |
| 138<br>2 | Hsa-Mir-423                                        | ENSG00000266919 |      | GeneCard |          |
| 138<br>3 | Novel Transcript                                   | ENSG00000267052 |      | GeneCard |          |
| 138<br>4 | Novel Transcript                                   | ENSG00000269918 |      | GeneCard |          |

|          |                                                                   |                 |      |          |          |
|----------|-------------------------------------------------------------------|-----------------|------|----------|----------|
| 138<br>5 | La Ribonucleoprotein Domain Family, Member 1B (LARP1B) Pseudogene | ENSG00000271680 |      | GeneCard |          |
| 138<br>6 | TEC                                                               | ENSG00000280087 |      | GeneCard |          |
| 138<br>7 | Ectonucleoside Triphosphate Diphosphohydrolase 1                  | ENTPD1          |      | GeneCard | DisGenet |
| 138<br>8 | Ectonucleoside Triphosphate Diphosphohydrolase 7                  | ENTPD7          |      | GeneCard |          |
| 138<br>9 | E1A Binding Protein P300                                          | EP300           |      | GeneCard |          |
| 139<br>0 | Endothelial PAS Domain Protein 1                                  | EPAS1           |      | GeneCard | DisGenet |
| 139<br>1 | Erythrocyte Membrane Protein Band 4.1 Like 3                      | EPB41L3         |      | GeneCard |          |
| 139<br>2 | EPB41L4A Antisense RNA 1                                          | EPB41L4A-AS1    |      | GeneCard |          |
| 139<br>3 | EPH Receptor A1                                                   | EPHA1           |      | GeneCard | DisGenet |
| 139<br>4 | EPH Receptor A2                                                   | EPHA2           |      | GeneCard | DisGenet |
| 139<br>5 | EPH Receptor A3                                                   | EPHA3           |      | GeneCard |          |
| 139<br>6 | EPH Receptor A6                                                   | EPHA6           |      | GeneCard |          |
| 139<br>7 | EPH Receptor B2                                                   | EPHB2           |      | GeneCard | DisGenet |
| 139<br>8 | EPH Receptor B3                                                   | EPHB3           |      | GeneCard |          |
| 139<br>9 | Epoxide Hydrolase 1                                               | EPHX1           |      | GeneCard |          |
| 140<br>0 | Epoxide hydrolase 2, cytoplasmic                                  | EPHX2           | OMIM | GeneCard | DisGenet |
| 140<br>1 | EPM2A Glucan Phosphatase, Laforin                                 | EPM2A           |      | GeneCard |          |
| 140<br>2 | Epsin 1                                                           | EPN1            |      | GeneCard |          |
| 140<br>3 | Erythropoietin                                                    | EPO             |      | GeneCard | DisGenet |
| 140<br>4 | Erythropoietin Receptor                                           | EPOR            |      | GeneCard |          |



|          |                                                              |        |      |          |          |
|----------|--------------------------------------------------------------|--------|------|----------|----------|
| 140<br>5 | Epididymal Peptidase Inhibitor                               | EPPIN  |      | GeneCard |          |
| 140<br>6 | Glutamyl-Prolyl-TRNA Synthetase 1                            | EPRS1  |      | GeneCard | DisGenet |
| 140<br>7 | Epithelial Stromal Interaction 1                             | EPSTI1 |      | GeneCard |          |
| 140<br>8 | Endoplasmic Reticulum Aminopeptidase 1                       | ERAP1  |      | GeneCard |          |
| 140<br>9 | Erb-B2 Receptor Tyrosine Kinase 2                            | ERBB2  |      | GeneCard |          |
| 141<br>0 | Erb-B2 Receptor Tyrosine Kinase 4                            | ERBB4  |      | GeneCard |          |
| 141<br>1 | ErbB2 Interacting Protein                                    | ERBIN  |      | GeneCard |          |
| 141<br>2 | ERCC Excision Repair 1, Endonuclease Non-Catalytic Subunit   | ERCC1  |      | GeneCard |          |
| 141<br>3 | ERCC Excision Repair 2, TFIIH Core Complex Helicase Subunit  | ERCC2  |      | GeneCard |          |
| 141<br>4 | ERCC Excision Repair 3, TFIIH Core Complex Helicase Subunit  | ERCC3  |      | GeneCard |          |
| 141<br>5 | ERCC Excision Repair 4, Endonuclease Catalytic Subunit       | ERCC4  |      | GeneCard |          |
| 141<br>6 | ERCC Excision Repair 5, Endonuclease                         | ERCC5  |      | GeneCard |          |
| 141<br>7 | ERCC Excision Repair 6, Chromatin Remodeling Factor          | ERCC6  |      | GeneCard |          |
| 141<br>8 | ERCC Excision Repair 8, CSA Ubiquitin Ligase Complex Subunit | ERCC8  | OMIM | GeneCard |          |
| 141<br>9 | Epiregulin                                                   | EREG   | OMIM | GeneCard | DisGenet |
| 142<br>0 | Erythroferrone                                               | ERFE   |      | GeneCard |          |
| 142<br>1 | ETS Transcription Factor ERG                                 | ERG    |      | GeneCard | DisGenet |
| 142<br>2 | Endoplasmic Reticulum To Nucleus Signaling 1                 | ERN1   |      | GeneCard | DisGenet |
| 142<br>3 | Endothelial Cell Adhesion Molecule                           | ESAM   |      | GeneCard | DisGenet |
| 142<br>4 | Endothelial Cell Specific Molecule 1                         | ESM1   |      | GeneCard |          |

|          |                                                           |        |      |          |          |
|----------|-----------------------------------------------------------|--------|------|----------|----------|
| 142<br>5 | Estrogen receptor 1                                       | ESR1   | OMIM | GeneCard | DisGenet |
| 142<br>6 | Estrogen Receptor 2                                       | ESR2   |      | GeneCard | DisGenet |
| 142<br>7 | Estrogen Related Receptor Alpha                           | ESRRA  |      | GeneCard |          |
| 142<br>8 | Estrogen Related Receptor Beta                            | ESRRB  |      | GeneCard |          |
| 142<br>9 | Ethanolamine-Phosphate Phospho-Lyase                      | ETNPPL |      | GeneCard |          |
| 143<br>0 | ETS Proto-Oncogene 1, Transcription Factor                | ETS1   |      | GeneCard | DisGenet |
| 143<br>1 | ETS Proto-Oncogene 2, Transcription Factor                | ETS2   |      | GeneCard |          |
| 143<br>2 | ETS Variant Transcription Factor 1                        | ETV1   |      | GeneCard |          |
| 143<br>3 | ETS Variant Transcription Factor 6                        | ETV6   |      | GeneCard |          |
| 143<br>4 | Eva-1 Homolog A, Regulator Of Programmed Cell Death       | EVA1A  |      | GeneCard |          |
| 143<br>5 | Enah/Vasp-Like                                            | EVL    |      | GeneCard |          |
| 143<br>6 | Envoplakin                                                | EVPL   |      |          | DisGenet |
| 143<br>7 | Even-Skipped Homeobox 1                                   | EVX1   |      | GeneCard |          |
| 143<br>8 | Even-Skipped Homeobox 2                                   | EVX2   |      | GeneCard |          |
| 143<br>9 | Exonuclease 1                                             | EXO1   |      | GeneCard |          |
| 144<br>0 | Exosome Component 4                                       | EXOSC4 |      | GeneCard |          |
| 144<br>1 | EYA Transcriptional Coactivator and Phosphatase 1         | EYA1   |      | GeneCard |          |
| 144<br>2 | EYA Transcriptional Coactivator and Phosphatase 4         | EYA4   |      | GeneCard |          |
| 144<br>3 | Eyes Shut Homolog                                         | EYS    |      | GeneCard |          |
| 144<br>4 | Enhancer Of Zeste 2 Polycomb Repressive Complex 2 Subunit | EZH2   |      | GeneCard | DisGenet |

|          |                                                |         |      |          |          |
|----------|------------------------------------------------|---------|------|----------|----------|
| 144<br>5 | Coagulation Factor X                           | F10     |      | GeneCard | DisGenet |
| 144<br>6 | Coagulation Factor XI                          | F11     |      | GeneCard | DisGenet |
| 144<br>7 | F11 Antisense RNA 1                            | F11-AS1 |      | GeneCard |          |
| 144<br>8 | F11 Receptor                                   | F11R    |      | GeneCard | DisGenet |
| 144<br>9 | Coagulation Factor XII                         | F12     |      | GeneCard | DisGenet |
| 145<br>0 | Coagulation Factor XIII A Chain                | F13A1   | OMIM | GeneCard | DisGenet |
| 145<br>1 | Coagulation Factor XIII B Chain                | F13B    |      | GeneCard |          |
| 145<br>2 | Coagulation Factor II, Thrombin                | F2      | OMIM | GeneCard | DisGenet |
| 145<br>3 | Coagulation Factor II Thrombin Receptor        | F2R     |      | GeneCard | DisGenet |
| 145<br>4 | F2R Like Trypsin Receptor 1                    | F2RL1   |      | GeneCard | DisGenet |
| 145<br>5 | Coagulation Factor II Thrombin Receptor Like 2 | F2RL2   |      | GeneCard |          |
| 145<br>6 | F2R Like Thrombin Or Trypsin Receptor 3        | F2RL3   |      | GeneCard |          |
| 145<br>7 | Coagulation Factor III, Tissue Factor          | F3      |      | GeneCard | DisGenet |
| 145<br>8 | Coagulation Factor V                           | F5      | OMIM | GeneCard | DisGenet |
| 145<br>9 | Coagulation Factor VII                         | F7      | OMIM | GeneCard | DisGenet |
| 146<br>0 | Coagulation Factor VIII                        | F8      |      | GeneCard |          |
| 146<br>1 | Coagulation Factor IX                          | F9      |      | GeneCard |          |
| 146<br>2 | Fatty Acid 2-Hydroxylase                       | FA2H    |      | GeneCard | DisGenet |
| 146<br>3 | Fatty Acid Binding Protein 12                  | FABP12  |      | GeneCard |          |
| 146<br>4 | Fatty Acid Binding Protein 2                   | FABP2   |      | GeneCard | DisGenet |

|          |                                                  |         |      |          |          |
|----------|--------------------------------------------------|---------|------|----------|----------|
| 146<br>5 | Fatty Acid Binding Protein 3                     | FABP3   |      | GeneCard | DisGenet |
| 146<br>6 | Fatty Acid Binding Protein 4                     | FABP4   | OMIM | GeneCard | DisGenet |
| 146<br>7 | Fatty Acid Binding Protein 5                     | FABP5   |      | GeneCard | DisGenet |
| 146<br>8 | Fatty Acid Binding Protein 6                     | FABP6   |      | GeneCard |          |
| 146<br>9 | Fas Associated Via Death Domain                  | FADD    |      | GeneCard |          |
| 147<br>0 | Fatty Acid Desaturase 1                          | FADS1   |      | GeneCard | DisGenet |
| 147<br>1 | Fatty Acid Desaturase 2                          | FADS2   |      | GeneCard | DisGenet |
| 147<br>2 | Fatty Acid Desaturase 3                          | FADS3   |      | GeneCard |          |
| 147<br>3 | Fumarylacetoacetate Hydrolase                    | FAH     |      | GeneCard |          |
| 147<br>4 | Family With Sequence Similarity 126 Member A     | FAM126A |      | GeneCard |          |
| 147<br>5 | Family With Sequence Similarity 13 Member A      | FAM13A  |      | GeneCard |          |
| 147<br>6 | Family With Sequence Similarity 186 Member A     | FAM186A |      | GeneCard |          |
| 147<br>7 | FAM20C Golgi Associated Secretory Pathway Kinase | FAM20C  |      | GeneCard | DisGenet |
| 147<br>8 | Family With Sequence Similarity 223 Member A     | FAM223A |      | GeneCard |          |
| 147<br>9 | Family With Sequence Similarity 89 Member A      | FAM89A  |      | GeneCard |          |
| 148<br>0 | FA Complementation Group A                       | FANCA   |      | GeneCard |          |
| 148<br>1 | Fibroblast Activation Protein Alpha              | FAP     |      | GeneCard | DisGenet |
| 148<br>2 | Phenylalanyl-TRNA Synthetase 2, Mitochondrial    | FARS2   |      | GeneCard |          |
| 148<br>3 | Fas Cell Surface Death Receptor                  | FAS     |      | GeneCard | DisGenet |
| 148<br>4 | Fas Ligand                                       | FASLG   |      | GeneCard | DisGenet |

|          |                                         |        |  |          |          |
|----------|-----------------------------------------|--------|--|----------|----------|
| 148<br>5 | Fatty Acid Synthase                     | FASN   |  | GeneCard |          |
| 148<br>6 | FAT Atypical Cadherin 1                 | FAT1   |  |          | DisGenet |
| 148<br>7 | FAT Atypical Cadherin 4                 | FAT4   |  | GeneCard |          |
| 148<br>8 | Filamin Binding LIM Protein 1           | FBLIM1 |  | GeneCard |          |
| 148<br>9 | Fibulin 1                               | FBLN1  |  | GeneCard |          |
| 149<br>0 | Fibulin 2                               | FBLN2  |  |          | DisGenet |
| 149<br>1 | Fibulin 5                               | FBLN5  |  | GeneCard |          |
| 149<br>2 | Fibrillin 1                             | FBN1   |  | GeneCard |          |
| 149<br>3 | Fibrillin 2                             | FBN2   |  | GeneCard |          |
| 149<br>4 | Fibrosin                                | FBRS   |  |          | DisGenet |
| 149<br>5 | F-Box Protein 15                        | FBXO15 |  | GeneCard |          |
| 149<br>6 | F-Box Protein 3                         | FBXO3  |  | GeneCard | DisGenet |
| 149<br>7 | F-Box Protein 32                        | FBXO32 |  | GeneCard |          |
| 149<br>8 | F-Box Protein 33                        | FBXO33 |  | GeneCard |          |
| 149<br>9 | F-Box Protein 38                        | FBXO38 |  | GeneCard |          |
| 150<br>0 | F-box Protein 8                         | FBXO8  |  |          | DisGenet |
| 150<br>1 | F-Box and WD Repeat Domain Containing 2 | FBXW2  |  | GeneCard |          |
| 150<br>2 | F-Box and WD Repeat Domain Containing 7 | FBXW7  |  | GeneCard |          |
| 150<br>3 | Fc Alpha and Mu Receptor                | FCAMR  |  | GeneCard |          |
| 150<br>4 | Fc Gamma Receptor Ia                    | FCGR1A |  | GeneCard |          |

|          |                                            |        |  |          |          |
|----------|--------------------------------------------|--------|--|----------|----------|
| 150<br>5 | Fc Gamma Receptor IIa                      | FCGR2A |  | GeneCard | DisGenet |
| 150<br>6 | Fc Gamma Receptor IIb                      | FCGR2B |  | GeneCard | DisGenet |
| 150<br>7 | Fc Gamma Receptor IIc (Gene/Pseudogene)    | FCGR2C |  | GeneCard |          |
| 150<br>8 | Fc Gamma Receptor IIIa                     | FCGR3A |  | GeneCard | DisGenet |
| 150<br>9 | Fc Gamma Receptor IIIb                     | FCGR3B |  | GeneCard | DisGenet |
| 151<br>0 | Fc Gamma Receptor and Transporter          | FCGRT  |  | GeneCard |          |
| 151<br>1 | Fc Mu Receptor                             | FCMR   |  | GeneCard |          |
| 151<br>2 | Ficolin 2                                  | FCN2   |  | GeneCard |          |
| 151<br>3 | Ficolin 3                                  | FCN3   |  | GeneCard |          |
| 151<br>4 | Fc Receptor Like 3                         | FCRL3  |  | GeneCard |          |
| 151<br>5 | Fc Receptor Like 6                         | FCRL6  |  | GeneCard | DisGenet |
| 151<br>6 | Farnesyl-Diphosphate Farnesyltransferase 1 | FDFT1  |  | GeneCard |          |
| 151<br>7 | Farnesyl Diphosphate Synthase              | FDPS   |  |          | DisGenet |
| 151<br>8 | Ferredoxin 1                               | FDX1   |  | GeneCard |          |
| 151<br>9 | Fem-1 Homolog A                            | FEM1A  |  | GeneCard |          |
| 152<br>0 | Fem-1 Homolog B                            | FEM1B  |  | GeneCard |          |
| 152<br>1 | Flap Structure-Specific Endonuclease 1     | FEN1   |  | GeneCard |          |
| 152<br>2 | FERM Domain Containing Kindlin 3           | FERMT3 |  | GeneCard |          |
| 152<br>3 | Fetuin B                                   | FETUB  |  | GeneCard | DisGenet |
| 152<br>4 | Free Fatty Acid Receptor 1                 | FFAR1  |  | GeneCard | DisGenet |

|          |                                     |       |      |          |          |
|----------|-------------------------------------|-------|------|----------|----------|
| 152<br>5 | Free Fatty Acid Receptor 4          | FFAR4 |      | GeneCard | DisGenet |
| 152<br>6 | Fibrinogen Alpha Chain              | FGA   | OMIM | GeneCard | DisGenet |
| 152<br>7 | Fibrinogen Beta Chain               | FGB   | OMIM | GeneCard | DisGenet |
| 152<br>8 | Fibroblast Growth Factor 1          | FGF1  |      | GeneCard | DisGenet |
| 152<br>9 | Fibroblast Growth Factor 10         | FGF10 |      | GeneCard |          |
| 153<br>0 | Fibroblast Growth Factor 12         | FGF12 |      | GeneCard | DisGenet |
| 153<br>1 | Fibroblast Growth Factor 13         | FGF13 |      |          | DisGenet |
| 153<br>2 | Fibroblast Growth Factor 14         | FGF14 |      | GeneCard |          |
| 153<br>3 | Fibroblast Growth Factor 19         | FGF19 |      | GeneCard | DisGenet |
| 153<br>4 | Fibroblast Growth Factor 2          | FGF2  |      | GeneCard | DisGenet |
| 153<br>5 | Fibroblast Growth Factor 21         | FGF21 |      | GeneCard | DisGenet |
| 153<br>6 | Fibroblast Growth Factor 23         | FGF23 |      | GeneCard | DisGenet |
| 153<br>7 | Fibroblast Growth Factor 3          | FGF3  |      | GeneCard |          |
| 153<br>8 | Fibroblast Growth Factor 4          | FGF4  |      | GeneCard |          |
| 153<br>9 | Fibroblast Growth Factor 6          | FGF6  |      | GeneCard |          |
| 154<br>0 | Fibroblast Growth Factor 7          | FGF7  |      | GeneCard |          |
| 154<br>1 | Fibroblast Growth Factor 9          | FGF9  |      | GeneCard |          |
| 154<br>2 | Fibroblast Growth Factor Receptor 1 | FGFR1 |      | GeneCard | DisGenet |
| 154<br>3 | Fibroblast Growth Factor Receptor 2 | FGFR2 |      | GeneCard |          |
| 154<br>4 | Fibroblast Growth Factor Receptor 3 | FGFR3 |      | GeneCard |          |

|          |                                                     |          |  |          |          |
|----------|-----------------------------------------------------|----------|--|----------|----------|
| 154<br>5 | Fibroblast Growth Factor Receptor 4                 | FGFR4    |  | GeneCard | DisGenet |
| 154<br>6 | Fibrinogen Gamma Chain                              | FGG      |  | GeneCard | DisGenet |
| 154<br>7 | Fumarate Hydratase                                  | FH       |  | GeneCard |          |
| 154<br>8 | Four And A Half LIM Domains 1                       | FHL1     |  | GeneCard |          |
| 154<br>9 | Four And A Half LIM Domains 2                       | FHL2     |  | GeneCard | DisGenet |
| 155<br>0 | Four And A Half LIM Domains 5                       | FHL5     |  | GeneCard |          |
| 155<br>1 | Formin Homology 2 Domain Containing 3               | FHOD3    |  | GeneCard |          |
| 155<br>2 | Folliculogenesis Specific BHLH Transcription Factor | FIGLA    |  | GeneCard |          |
| 155<br>3 | Factor Interacting with PAPOLA and CPSF1            | FIP1L1   |  | GeneCard |          |
| 155<br>4 | Fasting Glucose and Specific Insulin Levels         | FIQTL1   |  |          | DisGenet |
| 155<br>5 | FKBP Prolyl Isomerase 1A                            | FKBP1A   |  | GeneCard |          |
| 155<br>6 | FKBP Prolyl Isomerase 1B                            | FKBP1B   |  | GeneCard |          |
| 155<br>7 | Fukutin Related Protein                             | FKRP     |  | GeneCard |          |
| 155<br>8 | Fukutin                                             | FKTN     |  | GeneCard |          |
| 155<br>9 | Filamin A                                           | FLNA     |  | GeneCard | DisGenet |
| 156<br>0 | Filamin B                                           | FLNB     |  | GeneCard |          |
| 156<br>1 | Filamin C                                           | FLNC     |  | GeneCard |          |
| 156<br>2 | FLNC Antisense RNA 1                                | FLNC-AS1 |  | GeneCard |          |
| 156<br>3 | Fibronectin Leucine Rich Transmembrane Protein 2    | FLRT2    |  | GeneCard |          |
| 156<br>4 | Fms Related Receptor Tyrosine Kinase 1              | FLT1     |  | GeneCard | DisGenet |



|          |                                                        |         |  |          |          |
|----------|--------------------------------------------------------|---------|--|----------|----------|
| 156<br>5 | Fms Related Receptor Tyrosine Kinase 4                 | FLT4    |  | GeneCard | DisGenet |
| 156<br>6 | FLYWCH-Type Zinc Finger 1                              | FLYWCH1 |  | GeneCard |          |
| 156<br>7 | Formin 1                                               | FMN1    |  | GeneCard |          |
| 156<br>8 | Formin 2                                               | FMN2    |  | GeneCard |          |
| 156<br>9 | Formin Like 2                                          | FMNL2   |  | GeneCard |          |
| 157<br>0 | Flavin Containing Dimethylaniline Monooxygenase 3      | FMO3    |  | GeneCard | DisGenet |
| 157<br>1 | Fibromodulin                                           | FMOD    |  | GeneCard | DisGenet |
| 157<br>2 | Fragile X Messenger Ribonucleoprotein 1                | FMR1    |  | GeneCard |          |
| 157<br>3 | Fibronectin 1                                          | FN1     |  | GeneCard | DisGenet |
| 157<br>4 | Fibronectin Type III Domain Containing 4               | FNDC4   |  | GeneCard |          |
| 157<br>5 | Fibronectin Type III Domain Containing 5               | FNDC5   |  | GeneCard | DisGenet |
| 157<br>6 | Folate Hydrolase 1                                     | FOLH1   |  | GeneCard |          |
| 157<br>7 | Folate Receptor Beta                                   | FOLR2   |  | GeneCard | DisGenet |
| 157<br>8 | FOS Proto-Oncogene, AP-1 Transcription Factor Subunit  | FOS     |  | GeneCard | DisGenet |
| 157<br>9 | FOSB Proto-Oncogene, AP-1 Transcription Factor Subunit | FOSB    |  | GeneCard | DisGenet |
| 158<br>0 | FOS Like 1, AP-1 Transcription Factor Subunit          | FOSL1   |  | GeneCard |          |
| 158<br>1 | FOS Like 2, AP-1 Transcription Factor Subunit          | FOSL2   |  | GeneCard |          |
| 158<br>2 | Forkhead Box A1                                        | FOXA1   |  | GeneCard |          |
| 158<br>3 | Forkhead Box A2                                        | FOXA2   |  | GeneCard |          |
| 158<br>4 | Forkhead Box A3                                        | FOXA3   |  | GeneCard | DisGenet |

|          |                                                   |       |  |          |          |
|----------|---------------------------------------------------|-------|--|----------|----------|
| 158<br>5 | Forkhead Box B1                                   | FOXB1 |  | GeneCard |          |
| 158<br>6 | Forkhead Box C1                                   | FOXC1 |  | GeneCard |          |
| 158<br>7 | Forkhead Box C2                                   | FOXC2 |  | GeneCard |          |
| 158<br>8 | Forkhead Box D4                                   | FOXD4 |  | GeneCard |          |
| 158<br>9 | Forkhead Box E1                                   | FOXE1 |  | GeneCard |          |
| 159<br>0 | Forkhead Box E3                                   | FOXE3 |  | GeneCard |          |
| 159<br>1 | Forkhead Box J1                                   | FOXJ1 |  | GeneCard |          |
| 159<br>2 | Forkhead Box L2                                   | FOXL2 |  | GeneCard |          |
| 159<br>3 | Forkhead Box M1                                   | FOXM1 |  | GeneCard | DisGenet |
| 159<br>4 | Forkhead Box O1                                   | FOXO1 |  | GeneCard | DisGenet |
| 159<br>5 | Forkhead Box O3                                   | FOXO3 |  | GeneCard | DisGenet |
| 159<br>6 | Forkhead Box O4                                   | FOXO4 |  | GeneCard | DisGenet |
| 159<br>7 | Forkhead Box P1                                   | FOXP1 |  | GeneCard | DisGenet |
| 159<br>8 | Forkhead Box P2                                   | FOXP2 |  | GeneCard |          |
| 159<br>9 | Forkhead Box P3                                   | FOXP3 |  | GeneCard | DisGenet |
| 160<br>0 | Folypolyglutamate Synthase                        | FPGS  |  | GeneCard |          |
| 160<br>1 | Formyl Peptide Receptor 1                         | FPR1  |  | GeneCard |          |
| 160<br>2 | Formyl Peptide Receptor 2                         | FPR2  |  | GeneCard | DisGenet |
| 160<br>3 | Fibroblast Growth Factor Receptor Substrate 2     | FRS2  |  | GeneCard | DisGenet |
| 160<br>4 | Fibronectin Type III and SPRY Domain Containing 2 | FSD2  |  | GeneCard |          |

|      |                                                |         |  |          |          |
|------|------------------------------------------------|---------|--|----------|----------|
| 1605 | Follicle Stimulating Hormone Subunit Beta      | FSHB    |  | GeneCard |          |
| 1606 | Facioscapulohumeral Muscular Dystrophy 1A      | FSHMD1A |  |          | DisGenet |
| 1607 | Follicle Stimulating Hormone Receptor          | FSHR    |  | GeneCard |          |
| 1608 | Follistatin                                    | FST     |  | GeneCard | DisGenet |
| 1609 | Follistatin Like 1                             | FSTL1   |  | GeneCard |          |
| 1610 | Follistatin Like 3                             | FSTL3   |  |          | DisGenet |
| 1611 | Ferritin Heavy Chain 1                         | FTH1    |  | GeneCard | DisGenet |
| 1612 | FTO Alpha-Ketoglutarate Dependent Dioxygenase  | FTO     |  | GeneCard | DisGenet |
| 1613 | Furin, Paired Basic Amino Acid Cleaving Enzyme | FURIN   |  | GeneCard | DisGenet |
| 1614 | FUS RNA Binding Protein                        | FUS     |  | GeneCard |          |
| 1615 | Fucosyltransferase 3 (Lewis Blood Group)       | FUT3    |  | GeneCard | DisGenet |
| 1616 | Fucosyltransferase 4                           | FUT4    |  | GeneCard |          |
| 1617 | Fucosyltransferase 7                           | FUT7    |  | GeneCard | DisGenet |
| 1618 | Fucosyltransferase 8                           | FUT8    |  |          | DisGenet |
| 1619 | FYN Proto-Oncogene, Src Family Tyrosine Kinase | FYN     |  | GeneCard | DisGenet |
| 1620 | Frizzled Class Receptor 5                      | FZD5    |  |          | DisGenet |
| 1621 | Frizzled Class Receptor 8                      | FZD8    |  | GeneCard |          |
| 1622 | G0/G1 Switch 2                                 | G0S2    |  | GeneCard |          |
| 1623 | G3BP Stress Granule Assembly Factor 1          | G3BP1   |  | GeneCard |          |
| 1624 | Glucose-6-Phosphatase Catalytic Subunit 1      | G6PC1   |  | GeneCard |          |

|          |                                                        |         |  |          |          |
|----------|--------------------------------------------------------|---------|--|----------|----------|
| 162<br>5 | Glucose-6-Phosphatase Catalytic Subunit 2              | G6PC2   |  | GeneCard |          |
| 162<br>6 | Glucose-6-Phosphate Dehydrogenase                      | G6PD    |  | GeneCard |          |
| 162<br>7 | Alpha Glucosidase                                      | GAA     |  | GeneCard |          |
| 162<br>8 | GRB2 Associated Binding Protein 1                      | GAB1    |  | GeneCard |          |
| 162<br>9 | GA Binding Protein Transcription Factor Subunit Alpha  | GABPA   |  |          | DisGenet |
| 163<br>0 | Gamma-Aminobutyric Acid Type A Receptor Subunit Gamma1 | GABRG1  |  | GeneCard |          |
| 163<br>1 | Glutamate Decarboxylase 2                              | GAD2    |  | GeneCard |          |
| 163<br>2 | Growth Arrest and DNA Damage Inducible Alpha           | GADD45A |  | GeneCard | DisGenet |
| 163<br>3 | Growth Arrest and DNA Damage Inducible Gamma           | GADD45G |  | GeneCard |          |
| 163<br>4 | Galanin And GMAP Prepropeptide                         | GAL     |  | GeneCard |          |
| 163<br>5 | Galactose-3-O-Sulfotransferase 1                       | GAL3ST1 |  |          | DisGenet |
| 163<br>6 | Galactokinase 1                                        | GALK1   |  | GeneCard |          |
| 163<br>7 | Galactosamine (N-Acetyl)-6-Sulfatase                   | GALNS   |  | GeneCard |          |
| 163<br>8 | Polypeptide N-Acetylgalactosaminyltransferase 10       | GALNT10 |  | GeneCard |          |
| 163<br>9 | Polypeptide N-Acetylgalactosaminyltransferase 2        | GALNT2  |  | GeneCard |          |
| 164<br>0 | Polypeptide N-Acetylgalactosaminyltransferase 3        | GALNT3  |  | GeneCard |          |
| 164<br>1 | Galactose-1-Phosphate Uridyltransferase                | GALT    |  | GeneCard |          |
| 164<br>2 | Glucosidase II Alpha Subunit                           | GANAB   |  | GeneCard |          |
| 164<br>3 | Glucosidase Alpha, Neutral C                           | GANC    |  | GeneCard |          |
| 164<br>4 | Glyceraldehyde-3-Phosphate Dehydrogenase               | GAPDH   |  | GeneCard |          |

|          |                                                              |          |      |          |          |
|----------|--------------------------------------------------------------|----------|------|----------|----------|
| 164<br>5 | Glyceraldehyde 3 Phosphate Dehydrogenase Pseudogene 28       | GAPDHP28 |      | GeneCard |          |
| 164<br>6 | Growth Arrest Specific 5                                     | GAS5     |      | GeneCard | DisGenet |
| 164<br>7 | GAS5 Antisense RNA 1                                         | GAS5-AS1 |      | GeneCard |          |
| 164<br>8 | Growth Arrest Specific 6                                     | GAS6     |      | GeneCard | DisGenet |
| 164<br>9 | Gastrin                                                      | GAST     |      | GeneCard | DisGenet |
| 165<br>0 | GATA Binding Protein 2                                       | GATA2    |      | GeneCard | DisGenet |
| 165<br>1 | GATA Binding Protein 3                                       | GATA3    |      | GeneCard |          |
| 165<br>2 | GATA Binding Protein 4                                       | GATA4    |      | GeneCard | DisGenet |
| 165<br>3 | GATA Binding Protein 5                                       | GATA5    |      | GeneCard |          |
| 165<br>4 | GATA Binding Protein 6                                       | GATA6    |      | GeneCard |          |
| 165<br>5 | GATA Zinc Finger Domain Containing 1                         | GATAD1   |      | GeneCard |          |
| 165<br>6 | Glutamine Amidotransferase Like Class 1 Domain Containing 3A | GATD3A   |      |          | DisGenet |
| 165<br>7 | Glutamine Amidotransferase Like Class 1 Domain Containing 3B | GATD3B   |      |          | DisGenet |
| 165<br>8 | Glycine Amidinotransferase                                   | GATM     |      | GeneCard |          |
| 165<br>9 | Glucosylceramidase Beta                                      | GBA      |      | GeneCard |          |
| 166<br>0 | Guanylate Binding Protein 1                                  | GBP1     |      | GeneCard |          |
| 166<br>1 | GC Vitamin D Binding Protein                                 | GC       |      | GeneCard | DisGenet |
| 166<br>2 | Grancalcin                                                   | GCA      |      |          | DisGenet |
| 166<br>3 | Glucagon                                                     | GCG      | OMIM | GeneCard | DisGenet |
| 166<br>4 | Glucagon Receptor                                            | GCGR     |      |          | DisGenet |

|          |                                                |       |      |          |          |
|----------|------------------------------------------------|-------|------|----------|----------|
| 166<br>5 | GTP Cyclohydrolase 1                           | GCH1  |      | GeneCard | DisGenet |
| 166<br>6 | Glucokinase                                    | GCK   |      | GeneCard | DisGenet |
| 166<br>7 | Glucokinase Regulator                          | GCKR  |      | GeneCard | DisGenet |
| 166<br>8 | Glutamate-Cysteine Ligase Catalytic Subunit    | GCLC  | OMIM | GeneCard |          |
| 166<br>9 | Glutamate-Cysteine Ligase Modifier Subunit     | GCLM  | OMIM | GeneCard | DisGenet |
| 167<br>0 | GCOM1, MYZAP-POLR2M Combined Locus             | GCOM1 |      | GeneCard |          |
| 167<br>1 | Glycerophosphodiester Phosphodiesterase 1      | GDE1  |      | GeneCard |          |
| 167<br>2 | Growth Differentiation Factor 10               | GDF10 |      | GeneCard |          |
| 167<br>3 | Growth Differentiation Factor 11               | GDF11 |      | GeneCard | DisGenet |
| 167<br>4 | Growth Differentiation Factor 15               | GDF15 |      | GeneCard | DisGenet |
| 167<br>5 | Growth Differentiation Factor 2                | GDF2  |      | GeneCard | DisGenet |
| 167<br>6 | Growth Differentiation Factor 9                | GDF9  |      | GeneCard |          |
| 167<br>7 | Glial Cell Derived Neurotrophic Factor         | GDNF  |      | GeneCard |          |
| 167<br>8 | Glial Fibrillary Acidic Protein                | GFAP  |      | GeneCard |          |
| 167<br>9 | Growth Factor, Augmenter of Liver Regeneration | GFER  |      |          | DisGenet |
| 168<br>0 | G elongation Factor Mitochondrial 1            | GFM1  |      |          | DisGenet |
| 168<br>1 | Glutamine--Fructose-6-Phosphate Transaminase 1 | GFPT1 |      | GeneCard |          |
| 168<br>2 | Glutamine-Fructose-6-Phosphate Transaminase 2  | GFPT2 |      | GeneCard |          |
| 168<br>3 | GDNF Family Receptor Alpha Like                | GFRAL |      | GeneCard |          |
| 168<br>4 | Gamma-Glutamyl Carboxylase                     | GGCX  | OMIM | GeneCard | DisGenet |

|      |                                            |         |      |          |          |
|------|--------------------------------------------|---------|------|----------|----------|
| 1685 | Geranylgeranyl Diphosphate Synthase 1      | GGPS1   |      | GeneCard |          |
| 1686 | Gamma-Glutamyltransferase 1                | GGT1    |      | GeneCard |          |
| 1687 | Gamma-Glutamyltransferase 2, Pseudogene    | GGT2P   |      | GeneCard |          |
| 1688 | Gamma-Glutamyltransferase Light Chain 1    | GGTLC1  |      |          | DisGenet |
| 1689 | Growth Hormone 1                           | GH1     |      | GeneCard | DisGenet |
| 1690 | Growth Hormone Receptor                    | GHR     | OMIM | GeneCard |          |
| 1691 | Growth Hormone Releasing Hormone           | GHRH    |      | GeneCard |          |
| 1692 | Growth Hormone Releasing Hormone Receptor  | GHRHR   | OMIM | GeneCard | DisGenet |
| 1693 | Ghrelin And Obestatin Prepropeptide        | GHRL    |      | GeneCard | DisGenet |
| 1694 | Growth Hormone Secretagogue Receptor       | GHSR    |      | GeneCard | DisGenet |
| 1695 | GTPase, IMAP Family Member 5               | GIMAP5  |      | GeneCard |          |
| 1696 | Gastric Inhibitory Polypeptide             | GIP     |      | GeneCard | DisGenet |
| 1697 | GIPC PDZ Domain Containing Family Member 1 | GIPC1   |      | GeneCard |          |
| 1698 | Gap Junction Protein Alpha 1               | GJA1    |      | GeneCard | DisGenet |
| 1699 | Gap Junction Protein Alpha 4               | GJA4    | OMIM | GeneCard | DisGenet |
| 1700 | Gap Junction Protein Alpha 5               | GJA5    |      | GeneCard | DisGenet |
| 1701 | Gap Junction Protein Beta 1                | GJB1    |      | GeneCard |          |
| 1702 | GJD2 Divergent Transcript                  | GJD2-DT |      | GeneCard |          |
| 1703 | Galactosidase Alpha                        | GLA     |      | GeneCard |          |
| 1704 | Galactosidase Beta 1                       | GLB1    | OMIM | GeneCard |          |

|          |                                                 |        |  |          |          |
|----------|-------------------------------------------------|--------|--|----------|----------|
| 170<br>5 | Glycine Decarboxylase                           | GLDC   |  | GeneCard |          |
| 170<br>6 | GLI Family Zinc Finger 2                        | GLI2   |  |          | DisGenet |
| 170<br>7 | Glomulin, FKBP Associated Protein               | GLMN   |  | GeneCard |          |
| 170<br>8 | Glyoxalase I                                    | GLO1   |  | GeneCard | DisGenet |
| 170<br>9 | Glucagon Like Peptide 1 Receptor                | GLP1R  |  | GeneCard | DisGenet |
| 171<br>0 | Glycine Receptor Alpha 3                        | GLRA3  |  | GeneCard |          |
| 171<br>1 | Glutaredoxin                                    | GLRX   |  | GeneCard | DisGenet |
| 171<br>2 | Glutaredoxin Pseudogene 2                       | GLRXP2 |  | GeneCard |          |
| 171<br>3 | Glutaminase 2                                   | GLS2   |  | GeneCard |          |
| 171<br>4 | Glycolipid Transfer Protein Domain Containing 2 | GLTPD2 |  | GeneCard |          |
| 171<br>5 | G Protein Subunit Alpha 11                      | GNA11  |  | GeneCard |          |
| 171<br>6 | G Protein Subunit Alpha 12                      | GNA12  |  | GeneCard |          |
| 171<br>7 | G Protein Subunit Alpha 15                      | GNA15  |  | GeneCard |          |
| 171<br>8 | G Protein Subunit Alpha I1                      | GNAI1  |  | GeneCard |          |
| 171<br>9 | G Protein Subunit Alpha I2                      | GNAI2  |  | GeneCard |          |
| 172<br>0 | G Protein Subunit Alpha Q                       | GNAQ   |  | GeneCard |          |
| 172<br>1 | GNAS Complex Locus                              | GNAS   |  | GeneCard |          |
| 172<br>2 | G Protein Subunit Beta 3                        | GNB3   |  | GeneCard | DisGenet |
| 172<br>3 | G Protein Subunit Gamma Transducin 1            | GNGT1  |  | GeneCard |          |
| 172<br>4 | Glycine N-Methyltransferase                     | GNMT   |  | GeneCard |          |



|          |                                                     |         |      |          |          |
|----------|-----------------------------------------------------|---------|------|----------|----------|
| 172<br>5 | Glucosamine-6-Phosphate Deaminase 2                 | GNPDA2  |      | GeneCard |          |
| 172<br>6 | Gonadotropin Releasing Hormone 1                    | GNRH1   |      | GeneCard |          |
| 172<br>7 | Golgin A6 Family Member A                           | GOLGA6A |      |          | DisGenet |
| 172<br>8 | Golgin B1                                           | GOLGB1  |      | GeneCard | DisGenet |
| 172<br>9 | Golgin, RAB6 Interacting                            | GORAB   |      | GeneCard |          |
| 173<br>0 | Golgi Reassembly Stacking Protein 1                 | GORASP1 |      | GeneCard | DisGenet |
| 173<br>1 | Golgi SNAP Receptor Complex Member 2                | GOSR2   |      | GeneCard | DisGenet |
| 173<br>2 | Glutamic-Oxaloacetic Transaminase 2                 | GOT2    |      | GeneCard | DisGenet |
| 173<br>3 | Glycoprotein Ib Platelet Subunit Alpha              | GP1BA   |      | GeneCard | DisGenet |
| 173<br>4 | Glycoprotein Ib Platelet Subunit Beta               | GP1BB   |      | GeneCard |          |
| 173<br>5 | Glycoprotein V Platelet                             | GP5     |      | GeneCard |          |
| 173<br>6 | Glycoprotein VI Platelet                            | GP6     |      | GeneCard | DisGenet |
| 173<br>7 | Glycoprotein IX Platelet                            | GP9     |      | GeneCard |          |
| 173<br>8 | Glycerol-3-Phosphate Acyltransferase, Mitochondrial | GPAM    |      | GeneCard |          |
| 173<br>9 | G Protein-Coupled Bile Acid Receptor 1              | GPBAR1  |      | GeneCard | DisGenet |
| 174<br>0 | GC-Rich Promoter Binding Protein 1                  | GPBP1   | OMIM | GeneCard |          |
| 174<br>1 | Glypican 1                                          | GPC1    |      | GeneCard |          |
| 174<br>2 | Glypican 5                                          | GPC5    |      | GeneCard |          |
| 174<br>3 | Glycerol-3-Phosphate Dehydrogenase 2                | GPD2    |      | GeneCard |          |
| 174<br>4 | G Protein-Coupled Estrogen Receptor 1               | GPER1   |      | GeneCard | DisGenet |

|          |                                                                                  |         |  |          |          |
|----------|----------------------------------------------------------------------------------|---------|--|----------|----------|
| 174<br>5 | Glucose-6-Phosphate Isomerase                                                    | GPI     |  |          | DisGenet |
| 174<br>6 | Glycosylphosphatidylinositol Anchored High Density Lipoprotein Binding Protein 1 | GPIHBP1 |  | GeneCard | DisGenet |
| 174<br>7 | Glycosylphosphatidylinositol Specific Phospholipase D1                           | GPLD1   |  | GeneCard |          |
| 174<br>8 | Glycoprotein M6A                                                                 | GPM6A   |  | GeneCard |          |
| 174<br>9 | G Protein-Coupled Receptor 119                                                   | GPR119  |  | GeneCard | DisGenet |
| 175<br>0 | G Protein-Coupled Receptor 132                                                   | GPR132  |  | GeneCard |          |
| 175<br>1 | G Protein-Coupled Receptor 146                                                   | GPR146  |  | GeneCard |          |
| 175<br>2 | G Protein-Coupled Receptor 162                                                   | GPR162  |  |          | DisGenet |
| 175<br>3 | G Protein-Coupled Receptor 182                                                   | GPR182  |  | GeneCard |          |
| 175<br>4 | G Protein-Coupled Receptor 25                                                    | GPR25   |  | GeneCard |          |
| 175<br>5 | G Protein-Coupled Receptor 26                                                    | GPR26   |  | GeneCard |          |
| 175<br>6 | G Protein-Coupled Receptor 3                                                     | GPR3    |  | GeneCard |          |
| 175<br>7 | G Protein-Coupled Receptor 32                                                    | GPR32   |  | GeneCard |          |
| 175<br>8 | G Protein-Coupled Receptor 35                                                    | GPR35   |  | GeneCard |          |
| 175<br>9 | G Protein-Coupled Receptor 37 Like 1                                             | GPR37L1 |  | GeneCard |          |
| 176<br>0 | G Protein-Coupled Receptor 39                                                    | GPR39   |  |          | DisGenet |
| 176<br>1 | G Protein-Coupled Receptor 42 (gene/pseudogene)                                  | GPR42   |  |          | DisGenet |
| 176<br>2 | G Protein-Coupled Receptor 55                                                    | GPR55   |  | GeneCard | DisGenet |
| 176<br>3 | G Protein-Coupled Receptor 65                                                    | GPR65   |  | GeneCard |          |
| 176<br>4 | G Protein-Coupled Receptor 68                                                    | GPR68   |  | GeneCard |          |

|          |                                                     |         |  |          |          |
|----------|-----------------------------------------------------|---------|--|----------|----------|
| 176<br>5 | G Protein-Coupled Receptor Class C Group 5 Member B | GPRC5B  |  | GeneCard |          |
| 176<br>6 | G Protein Pathway Suppressor 2                      | GPS2    |  | GeneCard |          |
| 176<br>7 | G Protein Signaling Modulator 2                     | GPSM2   |  | GeneCard |          |
| 176<br>8 | Glutamic--Pyruvic Transaminase                      | GPT     |  | GeneCard |          |
| 176<br>9 | Glutathione Peroxidase 1                            | GPX1    |  | GeneCard | DisGenet |
| 177<br>0 | Glutathione Peroxidase 3                            | GPX3    |  | GeneCard |          |
| 177<br>1 | Glutathione Peroxidase 4                            | GPX4    |  | GeneCard | DisGenet |
| 177<br>2 | GRAM Domain Containing 1C                           | GRAMD1C |  | GeneCard |          |
| 177<br>3 | GRB2 Related Adaptor Protein 2                      | GRAP2   |  |          | DisGenet |
| 177<br>4 | Growth Factor Receptor Bound Protein 2              | GRB2    |  | GeneCard |          |
| 177<br>5 | Gremlin 1, DAN Family BMP Antagonist                | GREM1   |  | GeneCard | DisGenet |
| 177<br>6 | Glutamate Ionotropic Receptor AMPA Type Subunit 3   | GRIA3   |  | GeneCard |          |
| 177<br>7 | Glutamate Ionotropic Receptor Delta Type Subunit 1  | GRID1   |  | GeneCard |          |
| 177<br>8 | Glutamate Ionotropic Receptor NMDA Type Subunit 3A  | GRIN3A  |  | GeneCard |          |
| 177<br>9 | Glutamate Receptor Interacting Protein 1            | GRIP1   |  | GeneCard |          |
| 178<br>0 | G Protein-Coupled Receptor Kinase 2                 | GRK2    |  | GeneCard |          |
| 178<br>1 | G Protein-Coupled Receptor Kinase 4                 | GRK4    |  | GeneCard |          |
| 178<br>2 | G Protein-Coupled Receptor Kinase 6                 | GRK6    |  | GeneCard |          |
| 178<br>3 | Glutamate Metabotropic Receptor 8                   | GRM8    |  | GeneCard |          |
| 178<br>4 | Granulin Precursor                                  | GRN     |  | GeneCard | DisGenet |

|          |                                                        |        |  |          |          |
|----------|--------------------------------------------------------|--------|--|----------|----------|
| 178<br>5 | Gastrin Releasing Peptide                              | GRP    |  | GeneCard |          |
| 178<br>6 | Goosecoid Homeobox 2                                   | GSC2   |  | GeneCard |          |
| 178<br>7 | GSC Divergent Transcript                               | GSC-DT |  | GeneCard | DisGenet |
| 178<br>8 | Gasdermin E                                            | GSDME  |  | GeneCard |          |
| 178<br>9 | Glycogen Synthase Kinase 3 Alpha                       | GSK3A  |  | GeneCard |          |
| 179<br>0 | Glycogen Synthase Kinase 3 Beta                        | GSK3B  |  | GeneCard | DisGenet |
| 179<br>1 | Gelsolin                                               | GSN    |  | GeneCard |          |
| 179<br>2 | Glutathione-Disulfide Reductase                        | GSR    |  | GeneCard | DisGenet |
| 179<br>3 | Glutathione Synthetase                                 | GSS    |  | GeneCard |          |
| 179<br>4 | Glutathione S-Transferase Alpha 4                      | GSTA4  |  | GeneCard |          |
| 179<br>5 | Glutathione S-Transferase C-Terminal Domain Containing | GSTCD  |  | GeneCard |          |
| 179<br>6 | Glutathione S-Transferase Kappa 1                      | GSTK1  |  |          | DisGenet |
| 179<br>7 | Glutathione S-Transferase Mu 1                         | GSTM1  |  | GeneCard | DisGenet |
| 179<br>8 | Glutathione S-Transferase Mu 2                         | GSTM2  |  | GeneCard | DisGenet |
| 179<br>9 | Glutathione S-Transferase Mu 3                         | GSTM3  |  | GeneCard |          |
| 180<br>0 | Glutathione S-Transferase Mu 4                         | GSTM4  |  | GeneCard |          |
| 180<br>1 | Glutathione S-Transferase Mu 5                         | GSTM5  |  | GeneCard |          |
| 180<br>2 | Glutathione S-Transferase Omega 1                      | GSTO1  |  | GeneCard | DisGenet |
| 180<br>3 | Glutathione S-Transferase Omega 2                      | GSTO2  |  | GeneCard |          |
| 180<br>4 | Glutathione S-Transferase Pi 1                         | GSTP1  |  | GeneCard |          |

|          |                                                 |         |      |          |          |
|----------|-------------------------------------------------|---------|------|----------|----------|
| 180<br>5 | Glutathione S-Transferase Theta 1               | GSTT1   |      | GeneCard | DisGenet |
| 180<br>6 | Glutathione S-Transferase Zeta 1                | GSTZ1   |      | GeneCard |          |
| 180<br>7 | General Transcription Factor IIE Subunit 2      | GTF2E2  |      | GeneCard |          |
| 180<br>8 | General Transcription Factor IIH Subunit 1      | GTF2H1  |      | GeneCard | DisGenet |
| 180<br>9 | General Transcription Factor IIH Subunit 2      | GTF2H2  |      | GeneCard |          |
| 181<br>0 | General Transcription Factor IIH Subunit 3      | GTF2H3  |      | GeneCard |          |
| 181<br>1 | General Transcription Factor IIH Subunit 4      | GTF2H4  |      | GeneCard |          |
| 181<br>2 | General Transcription Factor IIIA               | GTF3A   |      |          | DisGenet |
| 181<br>3 | Gilles de la Tourette Syndrome                  | GTS     |      |          | DisGenet |
| 181<br>4 | Guanylate Cyclase 1 Soluble Subunit Alpha 1     | GUCY1A1 |      | GeneCard | DisGenet |
| 181<br>5 | GULP PTB Domain Containing Engulfment Adaptor 1 | GULP1   |      | GeneCard |          |
| 181<br>6 | Glucuronidase Beta                              | GUSB    |      | GeneCard |          |
| 181<br>7 | Glycogenin 1                                    | GYG1    |      | GeneCard |          |
| 181<br>8 | Glycophorin A (MNS Blood Group)                 | GYPA    |      | GeneCard |          |
| 181<br>9 | Glycophorin C (Gerbich Blood Group)             | GYPC    |      | GeneCard | DisGenet |
| 182<br>0 | Granzyme B                                      | GZMB    |      | GeneCard | DisGenet |
| 182<br>1 | H1.0 Linker Histone                             | H1-0    |      | GeneCard |          |
| 182<br>2 | H1.1 Linker Histone, Cluster Member             | H1-1    |      | GeneCard |          |
| 182<br>3 | H19 Imprinted Maternally Expressed Transcript   | H19     | OMIM | GeneCard | DisGenet |
| 182<br>4 | H2A Clustered Histone 1                         | H2AC1   |      | GeneCard |          |

|          |                          |        |  |          |          |
|----------|--------------------------|--------|--|----------|----------|
| 182<br>5 | H2A Clustered Histone 18 | H2AC18 |  | GeneCard |          |
| 182<br>6 | H2A Clustered Histone 20 | H2AC20 |  | GeneCard |          |
| 182<br>7 | H2A.X Variant Histone    | H2AX   |  | GeneCard |          |
| 182<br>8 | H2B Clustered Histone 21 | H2BC21 |  | GeneCard |          |
| 182<br>9 | H2B Clustered Histone 3  | H2BC3  |  | GeneCard |          |
| 183<br>0 | H3.3 Histone A           | H3-3A  |  | GeneCard |          |
| 183<br>1 | H3.3 Histone B           | H3-3B  |  | GeneCard |          |
| 183<br>2 | H3.7 Histone (Putative)  | H3-7   |  | GeneCard |          |
| 183<br>3 | H3 Clustered Histone 1   | H3C1   |  | GeneCard |          |
| 183<br>4 | H3 Clustered Histone 10  | H3C10  |  | GeneCard |          |
| 183<br>5 | H3 Clustered Histone 11  | H3C11  |  | GeneCard |          |
| 183<br>6 | H3 Clustered Histone 12  | H3C12  |  | GeneCard |          |
| 183<br>7 | H3 Clustered Histone 2   | H3C2   |  | GeneCard |          |
| 183<br>8 | H3 Clustered Histone 3   | H3C3   |  | GeneCard |          |
| 183<br>9 | H3 Clustered Histone 4   | H3C4   |  | GeneCard |          |
| 184<br>0 | H3 Clustered Histone 6   | H3C6   |  | GeneCard |          |
| 184<br>1 | H3 Clustered Histone 7   | H3C7   |  | GeneCard |          |
| 184<br>2 | H3 Clustered Histone 8   | H3C8   |  | GeneCard |          |
| 184<br>3 | H3 Histone Pseudogene 10 | H3P10  |  |          | DisGenet |
| 184<br>4 | H3 Histone Pseudogene 23 | H3P23  |  |          | DisGenet |

|          |                                                          |       |      |          |          |
|----------|----------------------------------------------------------|-------|------|----------|----------|
| 184<br>5 | H3 Histone Pseudogene 28                                 | H3P28 |      |          | DisGenet |
| 184<br>6 | H3 Histone Pseudogene 31                                 | H3P31 |      |          | DisGenet |
| 184<br>7 | H4 Histone 16                                            | H4-16 |      | GeneCard | DisGenet |
| 184<br>8 | H4 Clustered Histone 1                                   | H4C1  |      | GeneCard | DisGenet |
| 184<br>9 | H4 Clustered Histone 11                                  | H4C11 |      | GeneCard | DisGenet |
| 185<br>0 | H4 Clustered Histone 12                                  | H4C12 |      | GeneCard | DisGenet |
| 185<br>1 | H4 Clustered Histone 13                                  | H4C13 |      | GeneCard | DisGenet |
| 185<br>2 | H4 Clustered Histone 14                                  | H4C14 |      | GeneCard | DisGenet |
| 185<br>3 | H4 Clustered Histone 15                                  | H4C15 |      | GeneCard | DisGenet |
| 185<br>4 | H4 Clustered Histone 2                                   | H4C2  |      | GeneCard | DisGenet |
| 185<br>5 | H4 Clustered Histone 3                                   | H4C3  |      | GeneCard | DisGenet |
| 185<br>6 | H4 Clustered Histone 4                                   | H4C4  |      | GeneCard | DisGenet |
| 185<br>7 | H4 Clustered Histone 5                                   | H4C5  |      | GeneCard | DisGenet |
| 185<br>8 | H4 Clustered Histone 6                                   | H4C6  |      | GeneCard | DisGenet |
| 185<br>9 | H4 Clustered Histone 8                                   | H4C8  |      | GeneCard | DisGenet |
| 186<br>0 | H4 Clustered Histone 9                                   | H4C9  |      | GeneCard | DisGenet |
| 186<br>1 | Hexose-6-Phosphate Dehydrogenase/Glucose 1-Dehydrogenase | H6PD  |      | GeneCard | DisGenet |
| 186<br>2 | Hyaluronan Binding Protein 2                             | HABP2 | OMIM | GeneCard | DisGenet |
| 186<br>3 | Hyaluronan Binding Protein 4                             | HABP4 |      | GeneCard |          |
| 186<br>4 | 3-Hydroxyacyl-CoA Dehydratase 4                          | HACD4 |      | GeneCard | DisGenet |

|          |                                                                               |           |      |          |          |
|----------|-------------------------------------------------------------------------------|-----------|------|----------|----------|
| 186<br>5 | Hydroxyacyl-CoA Dehydrogenase Trifunctional Multienzyme Complex Subunit Alpha | HADHA     |      | GeneCard |          |
| 186<br>6 | Hydroxyacyl-CoA Dehydrogenase Trifunctional Multienzyme Complex Subunit Beta  | HADHB     |      | GeneCard |          |
| 186<br>7 | Histidine Ammonia-Lyase                                                       | HAL       | OMIM | GeneCard | DisGenet |
| 186<br>8 | Hepcidin Antimicrobial Peptide                                                | HAMP      |      | GeneCard | DisGenet |
| 186<br>9 | Heart And Neural Crest Derivatives Expressed 1                                | HAND1     |      | GeneCard |          |
| 187<br>0 | Heart And Neural Crest Derivatives Expressed 2                                | HAND2     |      | GeneCard |          |
| 187<br>1 | HAND2 Antisense RNA 1                                                         | HAND2-AS1 |      | GeneCard |          |
| 187<br>2 | Hyaluronan Synthase 1                                                         | HAS1      |      | GeneCard |          |
| 187<br>3 | Hyaluronan Synthase 2                                                         | HAS2      |      | GeneCard | DisGenet |
| 187<br>4 | HAS2 Antisense RNA 1                                                          | HAS2-AS1  |      | GeneCard |          |
| 187<br>5 | Hyaluronan Synthase 3                                                         | HAS3      |      | GeneCard | DisGenet |
| 187<br>6 | Histone Acetyltransferase 1                                                   | HAT1      |      | GeneCard | DisGenet |
| 187<br>7 | Hepatitis A Virus Cellular Receptor 1                                         | HAVCR1    |      | GeneCard | DisGenet |
| 187<br>8 | Hepatitis A Virus Cellular Receptor 2                                         | HAVCR2    |      | GeneCard | DisGenet |
| 187<br>9 | Hemoglobin Subunit Alpha 1                                                    | HBA1      |      | GeneCard |          |
| 188<br>0 | Hemoglobin Subunit Beta                                                       | HBB       |      | GeneCard |          |
| 188<br>1 | Heparin Binding EGF Like Growth Factor                                        | HBEGF     |      | GeneCard | DisGenet |
| 188<br>2 | Hemoglobin Subunit Gamma 2                                                    | HBG2      |      | GeneCard |          |
| 188<br>3 | HMG-Box Transcription Factor 1                                                | HBP1      |      | GeneCard |          |
| 188<br>4 | HBS1 Like Translational GTPase                                                | HBS1L     |      | GeneCard |          |



|          |                                                                         |        |  |          |          |
|----------|-------------------------------------------------------------------------|--------|--|----------|----------|
| 188<br>5 | Hydroxycarboxylic Acid Receptor 1                                       | HCAR1  |  | GeneCard |          |
| 188<br>6 | Hydroxycarboxylic Acid Receptor 2                                       | HCAR2  |  | GeneCard | DisGenet |
| 188<br>7 | Hydroxycarboxylic Acid Receptor 3                                       | HCAR3  |  | GeneCard | DisGenet |
| 188<br>8 | Hepatocellular Carcinoma Associated Transcript 5                        | HCCAT5 |  |          | DisGenet |
| 188<br>9 | Host Cell Factor C1                                                     | HCFC1  |  | GeneCard |          |
| 189<br>0 | HLA Complex Group 27                                                    | HCG27  |  | GeneCard |          |
| 189<br>1 | HLA Complex Group 9                                                     | HCG9   |  | GeneCard |          |
| 189<br>2 | HCK Proto-Oncogene, Src Family Tyrosine Kinase                          | HCK    |  | GeneCard |          |
| 189<br>3 | Hyperpolarization Activated Cyclic Nucleotide Gated Potassium Channel 4 | HCN4   |  | GeneCard |          |
| 189<br>4 | Hypocretin Neuropeptide Precursor                                       | HCRT   |  | GeneCard | DisGenet |
| 189<br>5 | Histone Deacetylase 1                                                   | HDAC1  |  | GeneCard | DisGenet |
| 189<br>6 | Histone Deacetylase 2                                                   | HDAC2  |  | GeneCard |          |
| 189<br>7 | Histone Deacetylase 3                                                   | HDAC3  |  | GeneCard | DisGenet |
| 189<br>8 | Histone Deacetylase 4                                                   | HDAC4  |  | GeneCard |          |
| 189<br>9 | Histone Deacetylase 5                                                   | HDAC5  |  | GeneCard | DisGenet |
| 190<br>0 | Histone Deacetylase 6                                                   | HDAC6  |  | GeneCard | DisGenet |
| 190<br>1 | Histone Deacetylase 7                                                   | HDAC7  |  | GeneCard |          |
| 190<br>2 | Histone Deacetylase 9                                                   | HDAC9  |  | GeneCard | DisGenet |
| 190<br>3 | Histidine Decarboxylase                                                 | HDC    |  | GeneCard | DisGenet |
| 190<br>4 | HDGF Like 1                                                             | HDGFL1 |  | GeneCard |          |

|          |                                                                            |          |  |          |          |
|----------|----------------------------------------------------------------------------|----------|--|----------|----------|
| 190<br>5 | High-Density Lipoprotein Binding Protein                                   | HDLBP    |  | GeneCard | DisGenet |
| 190<br>6 | High-Density Lipoprotein Cholesterol, Low Serum, 3                         | HDLC3    |  | GeneCard |          |
| 190<br>7 | High-Density Lipoprotein Cholesterol Level QTL On Chromosome 8             | HDLCQ2   |  | GeneCard |          |
| 190<br>8 | HELLP Associated Long Non-Coding RNA                                       | HELLPAR  |  | GeneCard |          |
| 190<br>9 | Helicase, Lymphoid Specific                                                | HELLS    |  | GeneCard |          |
| 191<br>0 | HECT And RLD Domain Containing E3 Ubiquitin Protein Ligase 5               | HERC5    |  | GeneCard |          |
| 191<br>1 | HECT And RLD Domain Containing E3 Ubiquitin Protein Ligase Family Member 6 | HERC6    |  | GeneCard |          |
| 191<br>2 | Homocysteine Inducible ER Protein with Ubiquitin Like Domain 1             | HERPUD1  |  | GeneCard |          |
| 191<br>3 | Hes Family BHLH Transcription Factor 1                                     | HES1     |  | GeneCard | DisGenet |
| 191<br>4 | HEXIM P-TEFb Complex Subunit 1                                             | HEXIM1   |  | GeneCard | DisGenet |
| 191<br>5 | Hes Related Family BHLH Transcription Factor with YRPW Motif 2             | HEY2     |  | GeneCard |          |
| 191<br>6 | Homeostatic Iron Regulator                                                 | HFE      |  | GeneCard | DisGenet |
| 191<br>7 | Helicase For Meiosis 1                                                     | HFM1     |  | GeneCard |          |
| 191<br>8 | Homogentisate 1,2-Dioxygenase                                              | HGD      |  | GeneCard | DisGenet |
| 191<br>9 | Hepatocyte Growth Factor                                                   | HGF      |  | GeneCard | DisGenet |
| 192<br>0 | HGF Activator                                                              | HGFAC    |  | GeneCard |          |
| 192<br>1 | Hepatocyte Growth Factor-Regulated Tyrosine Kinase Substrate               | HGS      |  |          | DisGenet |
| 192<br>2 | Hematopoietically Expressed Homeobox                                       | HHEX     |  | GeneCard |          |
| 192<br>3 | Hedgehog Interacting Protein                                               | HHIP     |  | GeneCard |          |
| 192<br>4 | HHIP Antisense RNA 1                                                       | HHIP-AS1 |  | GeneCard |          |

|          |                                                        |           |  |          |          |
|----------|--------------------------------------------------------|-----------|--|----------|----------|
| 192<br>5 | HHIP Like 1                                            | HHIPL1    |  | GeneCard | DisGenet |
| 192<br>6 | Hypoxia Inducible Factor 1 Subunit Alpha               | HIF1A     |  | GeneCard | DisGenet |
| 192<br>7 | HIF1A Antisense RNA 1                                  | HIF1A-AS1 |  | GeneCard | DisGenet |
| 192<br>8 | HIF1A Antisense RNA 2                                  | HIF1A-AS2 |  | GeneCard |          |
| 192<br>9 | HIG1 Hypoxia Inducible Domain Family Member 1A         | HIGD1A    |  | GeneCard |          |
| 193<br>0 | Hypoxia Inducible Lipid Droplet Associated             | HILPDA    |  |          | DisGenet |
| 193<br>1 | Homeodomain Interacting Protein Kinase 3               | HIPK3     |  | GeneCard |          |
| 193<br>2 | Hexokinase 1                                           | HK1       |  | GeneCard |          |
| 193<br>3 | Hexokinase 2                                           | HK2       |  | GeneCard |          |
| 193<br>4 | Major Histocompatibility Complex, Class I, A           | HLA-A     |  | GeneCard | DisGenet |
| 193<br>5 | Major Histocompatibility Complex, Class I, B           | HLA-B     |  | GeneCard | DisGenet |
| 193<br>6 | Major Histocompatibility Complex, Class I, C           | HLA-C     |  | GeneCard | DisGenet |
| 193<br>7 | Major Histocompatibility Complex, Class II, DM Alpha   | HLA-DMA   |  | GeneCard |          |
| 193<br>8 | Major Histocompatibility Complex, Class II, DO Alpha   | HLA-DOA   |  | GeneCard |          |
| 193<br>9 | Major Histocompatibility Complex, Class II, DP Alpha 1 | HLA-DPA1  |  | GeneCard |          |
| 194<br>0 | Major Histocompatibility Complex, Class II, DP Beta 1  | HLA-DPB1  |  | GeneCard |          |
| 194<br>1 | Major Histocompatibility Complex, Class II, DQ Alpha 1 | HLA-DQA1  |  | GeneCard |          |
| 194<br>2 | Major Histocompatibility Complex, Class II, DQ Beta 1  | HLA-DQB1  |  | GeneCard |          |
| 194<br>3 | Major Histocompatibility Complex, Class II, DR Alpha   | HLA-DRA   |  | GeneCard |          |
| 194<br>4 | Major Histocompatibility Complex, Class II, DR Beta 1  | HLA-DRB1  |  | GeneCard |          |

|          |                                                 |         |      |          |          |
|----------|-------------------------------------------------|---------|------|----------|----------|
| 194<br>5 | Major Histocompatibility Complex, Class I, G    | HLA-G   |      | GeneCard |          |
| 194<br>6 | Hyperkeratosis Lenticularis Perstans            | HLP     |      |          | DisGenet |
| 194<br>7 | Helicase Like Transcription Factor              | HLTF    |      | GeneCard |          |
| 194<br>8 | H2.0 Like Homeobox                              | HLX     |      | GeneCard |          |
| 194<br>9 | HLX Antisense RNA 1                             | HLX-AS1 |      | GeneCard |          |
| 195<br>0 | Homeobox Containing 1                           | HMBOX1  |      | GeneCard | DisGenet |
| 195<br>1 | Hemicentin 1                                    | HMCN1   |      | GeneCard |          |
| 195<br>2 | High Mobility Group AT-Hook 1                   | HMGA1   |      | GeneCard | DisGenet |
| 195<br>3 | High Mobility Group AT-Hook 2                   | HMGA2   |      | GeneCard | DisGenet |
| 195<br>4 | High Mobility Group Box 1                       | HMGB1   |      | GeneCard | DisGenet |
| 195<br>5 | 3-Hydroxy-3-Methylglutaryl-CoA Lyase            | HMGCL   |      | GeneCard |          |
| 195<br>6 | 3-Hydroxy-3-Methylglutaryl-CoA Reductase        | HMGCR   |      | GeneCard | DisGenet |
| 195<br>7 | High Mobility Group Nucleosome Binding Domain 1 | HMGN1   |      | GeneCard |          |
| 195<br>8 | Heme Oxygenase 1                                | HMOX1   |      | GeneCard | DisGenet |
| 195<br>9 | Heme Oxygenase 2                                | HMOX2   |      | GeneCard |          |
| 196<br>0 | HNF1 Homeobox A                                 | HNF1A   | OMIM | GeneCard | DisGenet |
| 196<br>1 | HNF1 Homeobox B                                 | HNF1B   |      | GeneCard |          |
| 196<br>2 | Hepatocyte Nuclear Factor 4 Alpha               | HNF4A   |      | GeneCard | DisGenet |
| 196<br>3 | Hypertensive Nephropathy                        | HNP1    |      | GeneCard | DisGenet |
| 196<br>4 | Heterogeneous Nuclear Ribonucleoprotein A1      | HNRNPA1 |      | GeneCard |          |

|          |                                                          |                |      |          |          |
|----------|----------------------------------------------------------|----------------|------|----------|----------|
| 196<br>5 | Heterogeneous Nuclear Ribonucleoprotein A1 Pseudogene 10 | HNRNPA1P10     |      | GeneCard |          |
| 196<br>6 | Heterogeneous Nuclear Ribonucleoprotein A1 Pseudogene 4  | HNRNPA1P4      |      | GeneCard |          |
| 196<br>7 | Heterogeneous Nuclear Ribonucleoprotein A2/B1            | HNRNPA2B1      |      | GeneCard |          |
| 196<br>8 | Heterogeneous Nuclear Ribonucleoprotein A/B              | HNRNPAB        |      | GeneCard |          |
| 196<br>9 | Heterogeneous Nuclear Ribonucleoprotein C                | HNRNPC         |      | GeneCard |          |
| 197<br>0 | Heterogeneous Nuclear Ribonucleoprotein K                | HNRNPK         |      | GeneCard |          |
| 197<br>1 | Heterogeneous Nuclear Ribonucleoprotein L                | HNRNPL         |      | GeneCard |          |
| 197<br>2 | Heterogeneous Nuclear Ribonucleoprotein U                | HNRNPU         |      |          | DisGenet |
| 197<br>3 | HNRNPUL2-BSCL2                                           | HNRNPUL2-BSCL2 |      | GeneCard |          |
| 197<br>4 | Homer Scaffold Protein 1                                 | HOMER1         |      | GeneCard |          |
| 197<br>5 | Homer Scaffold Protein 2                                 | HOMER2         |      | GeneCard |          |
| 197<br>6 | HOP Homeobox                                             | HOPX           |      | GeneCard |          |
| 197<br>7 | HOX Transcript Antisense RNA                             | HOTAIR         |      | GeneCard | DisGenet |
| 197<br>8 | HOXA Distal Transcript Antisense RNA                     | HOTTIP         |      | GeneCard |          |
| 197<br>9 | Homeobox A1                                              | HOXA1          |      | GeneCard | DisGenet |
| 198<br>0 | Homeobox A11                                             | HOXA11         |      | GeneCard |          |
| 198<br>1 | Homeobox A5                                              | HOXA5          |      | GeneCard |          |
| 198<br>2 | Homeobox A9                                              | HOXA9          |      | GeneCard |          |
| 198<br>3 | HOXA Cluster Antisense RNA 2                             | HOXA-AS2       |      | GeneCard |          |
| 198<br>4 | HOXA Cluster Antisense RNA 3                             | HOXA-AS3       | OMIM | GeneCard | DisGenet |

|          |                                                             |          |  |          |          |
|----------|-------------------------------------------------------------|----------|--|----------|----------|
| 198<br>5 | Homeobox B1                                                 | HOXB1    |  | GeneCard |          |
| 198<br>6 | Homeobox B7                                                 | HOXB7    |  | GeneCard |          |
| 198<br>7 | Homeobox B9                                                 | HOXB9    |  | GeneCard | DisGenet |
| 198<br>8 | Homeobox C6                                                 | HOXC6    |  | GeneCard |          |
| 198<br>9 | Homeobox C9                                                 | HOXC9    |  | GeneCard |          |
| 199<br>0 | HOXC Cluster Antisense RNA 1                                | HOXC-AS1 |  | GeneCard |          |
| 199<br>1 | Haptoglobin                                                 | HP       |  | GeneCard | DisGenet |
| 199<br>2 | Phosphate Binding Apolipoprotein                            | HPBP     |  | GeneCard |          |
| 199<br>3 | 4-Hydroxyphenylpyruvate Dioxygenase                         | HPD      |  | GeneCard |          |
| 199<br>4 | Hematopoietic Prostaglandin D Synthase                      | HPGDS    |  |          | DisGenet |
| 199<br>5 | Haptoglobin-Related Protein                                 | HPR      |  | GeneCard |          |
| 199<br>6 | Hypoxanthine Phosphoribosyltransferase 1                    | HPRT1    |  | GeneCard |          |
| 199<br>7 | HPS5 Biogenesis of Lysosomal Organelles Complex 2 Subunit 2 | HPS5     |  | GeneCard |          |
| 199<br>8 | Heparanase                                                  | HPSE     |  | GeneCard | DisGenet |
| 199<br>9 | Hemopexin                                                   | HPX      |  | GeneCard | DisGenet |
| 200<br>0 | HRas Proto-Oncogene, GTPase                                 | HRAS     |  | GeneCard |          |
| 200<br>1 | Histidine Rich Calcium Binding Protein                      | HRC      |  | GeneCard |          |
| 200<br>2 | Histidine Rich Glycoprotein                                 | HRG      |  | GeneCard |          |
| 200<br>3 | Histamine Receptor H1                                       | HRH1     |  | GeneCard | DisGenet |
| 200<br>4 | Histamine Receptor H2                                       | HRH2     |  | GeneCard | DisGenet |

|      |                                                                              |          |      |          |          |
|------|------------------------------------------------------------------------------|----------|------|----------|----------|
| 2005 | Hornerin                                                                     | HRNR     |      | GeneCard |          |
| 2006 | Homologous Recombination Factor With OB-Fold                                 | HROB     |      | GeneCard |          |
| 2007 | Heparan Sulfate-Glucosamine 3-Sulfotransferase 1                             | HS3ST1   |      | GeneCard | DisGenet |
| 2008 | Hydroxysteroid 11-Beta Dehydrogenase 1                                       | HSD11B1  |      | GeneCard | DisGenet |
| 2009 | Hydroxysteroid 11-Beta Dehydrogenase 2                                       | HSD11B2  |      | GeneCard |          |
| 2010 | Hydroxysteroid 17-Beta Dehydrogenase 4                                       | HSD17B4  |      | GeneCard |          |
| 2011 | Hydroxysteroid 17-Beta Dehydrogenase 6                                       | HSD17B6  |      | GeneCard |          |
| 2012 | Hydroxy-Delta-5-Steroid Dehydrogenase, 3 Beta- And Steroid Delta-Isomerase 1 | HSD3B1   |      | GeneCard |          |
| 2013 | Hydroxy-Delta-5-Steroid Dehydrogenase, 3 Beta- And Steroid Delta-Isomerase 7 | HSD3B7   |      | GeneCard |          |
| 2014 | Hydroxysteroid Dehydrogenase Like 2                                          | HSDL2    |      | GeneCard |          |
| 2015 | Heat Shock Transcription Factor 1                                            | HSF1     |      | GeneCard | DisGenet |
| 2016 | Hematopoietic SH2 Domain                                                     | HSH2D    |      |          | DisGenet |
| 2017 | Heat Shock Protein 90 Alpha Family Class A Member 1                          | HSP90AA1 |      | GeneCard | DisGenet |
| 2018 | Heat Shock Protein 90 Alpha Family Class B Member 1                          | HSP90AB1 |      | GeneCard |          |
| 2019 | Heat Shock Protein 90 Beta Family Member 1                                   | HSP90B1  |      | GeneCard | DisGenet |
| 2020 | Heat Shock Protein Family A (Hsp70) Member 12A                               | HSPA12A  | OMIM | GeneCard |          |
| 2021 | Heat Shock Protein Family A (Hsp70) Member 12B                               | HSPA12B  |      | GeneCard |          |
| 2022 | Heat Shock Protein Family A (Hsp70) Member 14                                | HSPA14   |      | GeneCard | DisGenet |
| 2023 | Heat Shock Protein Family A (Hsp70) Member 1A                                | HSPA1A   |      | GeneCard | DisGenet |
| 2024 | Heat Shock Protein Family A (Hsp70) Member 1B                                | HSPA1B   |      | GeneCard | DisGenet |

|      |                                                           |         |      |          |          |
|------|-----------------------------------------------------------|---------|------|----------|----------|
| 2025 | heat shock protein family A (Hsp70) member 2              | HSPA2   |      |          | DisGenet |
| 2026 | Heat Shock Protein Family A (Hsp70) Member 4              | HSPA4   |      | GeneCard | DisGenet |
| 2027 | Heat Shock Protein Family A (Hsp70) Member 5              | HSPA5   |      | GeneCard | DisGenet |
| 2028 | Heat Shock Protein Family A (Hsp70) Member 6              | HSPA6   |      | GeneCard |          |
| 2029 | Heat Shock Protein Family A (Hsp70) Member 7 (Pseudogene) | HSPA7   |      | GeneCard |          |
| 2030 | Heat Shock Protein Family A (Hsp70) Member 8              | HSPA8   |      | GeneCard |          |
| 2031 | Heat Shock Protein Family B (Small) Member 1              | HSPB1   | OMIM | GeneCard | DisGenet |
| 2032 | Heat Shock Protein Family B (Small) Member 2              | HSPB2   |      | GeneCard | DisGenet |
| 2033 | Heat Shock Protein Family B (Small) Member 3              | HSPB3   |      |          | DisGenet |
| 2034 | Heat Shock Protein Family B (Small) Member 6              | HSPB6   |      | GeneCard |          |
| 2035 | Heat Shock Protein Family B (Small) Member 7              | HSPB7   |      | GeneCard |          |
| 2036 | Heat Shock Protein Family B (Small) Member 8              | HSPB8   |      |          | DisGenet |
| 2037 | Heat Shock Protein Family D (Hsp60) Member 1              | HSPD1   |      | GeneCard | DisGenet |
| 2038 | Heat Shock Protein Family E (Hsp10) Member 1              | HSPE1   |      | GeneCard |          |
| 2039 | Heparan Sulfate Proteoglycan 2                            | HSPG2   |      | GeneCard | DisGenet |
| 2040 | HIV-1 TAT Interactive Protein 2                           | HTATIP2 |      |          | DisGenet |
| 2041 | Histatin 3                                                | HTN3    |      | GeneCard |          |
| 2042 | 5-Hydroxytryptamine Receptor 1A                           | HTR1A   |      | GeneCard |          |
| 2043 | 5-Hydroxytryptamine Receptor 2A                           | HTR2A   |      | GeneCard |          |
| 2044 | 5-Hydroxytryptamine Receptor 3A                           | HTR3A   |      | GeneCard |          |



|          |                                                           |        |  |          |          |
|----------|-----------------------------------------------------------|--------|--|----------|----------|
| 204<br>5 | 5-Hydroxytryptamine Receptor 4                            | HTR4   |  | GeneCard |          |
| 204<br>6 | HtrA Serine Peptidase 1                                   | HTRA1  |  | GeneCard |          |
| 204<br>7 | Huntingtin                                                | HTT    |  | GeneCard |          |
| 204<br>8 | Hepatocellular Carcinoma Up-Regulated Long Non-Coding RNA | HULC   |  | GeneCard |          |
| 204<br>9 | Hyaluronidase 1                                           | HYAL1  |  | GeneCard |          |
| 205<br>0 | Hyaluronidase 2                                           | HYAL2  |  | GeneCard |          |
| 205<br>1 | HYLS1 Centriolar and Ciliogenesis Associated              | HYLS1  |  |          | DisGenet |
| 205<br>2 | Hypoxia Up-Regulated 1                                    | HYOU1  |  | GeneCard |          |
| 205<br>3 | Islet Amyloid Polypeptide                                 | IAPP   |  | GeneCard |          |
| 205<br>4 | Integrin Binding Sialoprotein                             | IBSP   |  | GeneCard |          |
| 205<br>5 | Islet Cell Autoantigen 1                                  | ICA1   |  | GeneCard |          |
| 205<br>6 | Intercellular Adhesion Molecule 1                         | ICAM1  |  | GeneCard | DisGenet |
| 205<br>7 | Intercellular Adhesion Molecule 2                         | ICAM2  |  | GeneCard |          |
| 205<br>8 | Intercellular Adhesion Molecule 3                         | ICAM3  |  | GeneCard |          |
| 205<br>9 | Isoprenylcysteine Carboxyl Methyltransferase              | ICMT   |  | GeneCard |          |
| 206<br>0 | Inducible T Cell Costimulator                             | ICOS   |  | GeneCard | DisGenet |
| 206<br>1 | Inducible T Cell Costimulator Ligand                      | ICOSLG |  | GeneCard |          |
| 206<br>2 | Inhibitor Of DNA Binding 1, HLH Protein                   | ID1    |  | GeneCard | DisGenet |
| 206<br>3 | Inhibitor Of DNA Binding 3, HLH Protein                   | ID3    |  | GeneCard | DisGenet |
| 206<br>4 | Insulin Degrading Enzyme                                  | IDE    |  | GeneCard |          |

|          |                                                             |          |  |          |          |
|----------|-------------------------------------------------------------|----------|--|----------|----------|
| 206<br>5 | Isocitrate Dehydrogenase (NADP(+)) 1                        | IDH1     |  | GeneCard |          |
| 206<br>6 | Isocitrate Dehydrogenase (NADP(+)) 2                        | IDH2     |  | GeneCard | DisGenet |
| 206<br>7 | Isopentenyl-Diphosphate Delta Isomerase 1                   | IDI1     |  | GeneCard |          |
| 206<br>8 | IDI2 Antisense RNA 1                                        | IDI2-AS1 |  | GeneCard |          |
| 206<br>9 | Indoleamine 2,3-Dioxygenase 1                               | IDO1     |  | GeneCard | DisGenet |
| 207<br>0 | Iduronate 2-Sulfatase                                       | IDS      |  | GeneCard |          |
| 207<br>1 | Immediate Early Response 3                                  | IER3     |  | GeneCard |          |
| 207<br>2 | Interferon Gamma Inducible Protein 16                       | IFI16    |  | GeneCard |          |
| 207<br>3 | Interferon Alpha Inducible Protein 27                       | IFI27    |  | GeneCard | DisGenet |
| 207<br>4 | Interferon Induced Protein 35                               | IFI35    |  | GeneCard |          |
| 207<br>5 | Interferon Induced Protein 44 Like                          | IFI44L   |  | GeneCard |          |
| 207<br>6 | Interferon Induced with Helicase C Domain 1                 | IFIH1    |  | GeneCard |          |
| 207<br>7 | Interferon Induced Protein with Tetratricopeptide Repeats 3 | IFIT3    |  | GeneCard |          |
| 207<br>8 | Interferon, Type 1, Cluster                                 | IFN1@    |  | GeneCard |          |
| 207<br>9 | Interferon Alpha 1                                          | IFNA1    |  | GeneCard | DisGenet |
| 208<br>0 | Interferon Alpha 13                                         | IFNA13   |  |          | DisGenet |
| 208<br>1 | Interferon Alpha 2                                          | IFNA2    |  | GeneCard |          |
| 208<br>2 | Interferon Alpha 21                                         | IFNA21   |  | GeneCard |          |
| 208<br>3 | Interferon Alpha and Beta Receptor Subunit 1                | IFNAR1   |  | GeneCard |          |
| 208<br>4 | Interferon Alpha and Beta Receptor Subunit 2                | IFNAR2   |  | GeneCard |          |

|          |                                                                |         |      |          |          |
|----------|----------------------------------------------------------------|---------|------|----------|----------|
| 208<br>5 | Interferon Beta 1                                              | IFNB1   |      | GeneCard |          |
| 208<br>6 | Interferon Gamma                                               | IFNG    |      | GeneCard | DisGenet |
| 208<br>7 | Interferon Gamma Receptor 1                                    | IFNGR1  |      | GeneCard |          |
| 208<br>8 | Interferon Gamma Receptor 2                                    | IFNGR2  |      | GeneCard |          |
| 208<br>9 | Interferon Kappa                                               | IFNK    |      | GeneCard |          |
| 209<br>0 | Interferon Related Developmental Regulator 1                   | IFRD1   |      | GeneCard |          |
| 209<br>1 | Intraflagellar Transport 20                                    | IFT20   |      | GeneCard |          |
| 209<br>2 | Intraflagellar Transport 80                                    | IFT80   |      | GeneCard |          |
| 209<br>3 | Intraflagellar Transport 88                                    | IFT88   |      | GeneCard |          |
| 209<br>4 | Immunoglobulin Binding Protein 1                               | IGBP1   |      | GeneCard |          |
| 209<br>5 | Immunoglobulin E Concentration, Serum                          | IGES    |      | GeneCard |          |
| 209<br>6 | Insulin Like Growth Factor 1                                   | IGF1    |      | GeneCard | DisGenet |
| 209<br>7 | Insulin Like Growth Factor 1 Receptor                          | IGF1R   |      | GeneCard | DisGenet |
| 209<br>8 | Insulin Like Growth Factor 2                                   | IGF2    | OMIM | GeneCard | DisGenet |
| 209<br>9 | IGF2 Antisense RNA                                             | IGF2-AS |      | GeneCard |          |
| 210<br>0 | Insulin Like Growth Factor 2 mRNA Binding Protein 1            | IGF2BP1 |      | GeneCard |          |
| 210<br>1 | Insulin Like Growth Factor 2 mRNA Binding Protein 2            | IGF2BP2 |      | GeneCard |          |
| 210<br>2 | Insulin Like Growth Factor 2 Receptor                          | IGF2R   |      | GeneCard | DisGenet |
| 210<br>3 | Insulin Like Growth Factor Binding Protein Acid Labile Subunit | IGFALS  |      | GeneCard |          |
| 210<br>4 | Insulin Like Growth Factor Binding Protein 1                   | IGFBP1  |      | GeneCard | DisGenet |

|          |                                                                     |           |      |          |          |
|----------|---------------------------------------------------------------------|-----------|------|----------|----------|
| 210<br>5 | Insulin Like Growth Factor 2 MRNA Binding Protein 2                 | IGFBP2    |      | GeneCard |          |
| 210<br>6 | Insulin Like Growth Factor 2 Receptor                               | IGFBP3    |      | GeneCard | DisGenet |
| 210<br>7 | Insulin Like Growth Factor Binding Protein Acid Labile Subunit      | IGFBP4    |      | GeneCard |          |
| 210<br>8 | Insulin Like Growth Factor Binding Protein 1                        | IGFBP5    |      | GeneCard | DisGenet |
| 210<br>9 | Insulin Like Growth Factor Binding Protein 2                        | IGFBP7    |      | GeneCard | DisGenet |
| 211<br>0 | Insulin Like Growth Factor Binding Protein 3                        | IGHE      |      | GeneCard | DisGenet |
| 211<br>1 | Insulin Like Growth Factor Binding Protein 4                        | IGHG1     |      | GeneCard |          |
| 211<br>2 | Insulin Like Growth Factor Binding Protein 5                        | IGHG3     |      | GeneCard | DisGenet |
| 211<br>3 | Insulin Like Growth Factor Binding Protein 7                        | IGKV@     |      | GeneCard |          |
| 211<br>4 | Immunoglobulin Heavy Constant Epsilon                               | IGKV2D-29 |      | GeneCard | DisGenet |
| 211<br>5 | Immunoglobulin Heavy Constant Gamma 1 (G1m Marker)                  | IGLV2-18  |      | GeneCard | DisGenet |
| 211<br>6 | Immunoglobulin Kappa Variable Cluster                               | IGSF1     |      | GeneCard | DisGenet |
| 211<br>7 | IK Cytokine                                                         | IK        |      | GeneCard |          |
| 211<br>8 | Inhibitor Of Nuclear Factor Kappa B Kinase Subunit Beta             | IKBKB     |      | GeneCard | DisGenet |
| 211<br>9 | Inhibitor Of Nuclear Factor Kappa B Kinase Subunit Epsilon          | IKBKE     |      | GeneCard |          |
| 212<br>0 | Inhibitor Of Nuclear Factor Kappa B Kinase Regulatory Subunit Gamma | IKBKG     |      | GeneCard |          |
| 212<br>1 | Interleukin-10                                                      | IL10      | OMIM | GeneCard | DisGenet |
| 212<br>2 | Interleukin 10 Receptor Subunit Alpha                               | IL10RA    |      | GeneCard |          |
| 212<br>3 | Interleukin 11                                                      | IL11      |      | GeneCard | DisGenet |
| 212<br>4 | Interleukin 12A                                                     | IL12A     |      | GeneCard |          |

|          |                                           |           |      |          |          |
|----------|-------------------------------------------|-----------|------|----------|----------|
| 212<br>5 | IL12A Antisense RNA 1                     | IL12A-AS1 |      | GeneCard |          |
| 212<br>6 | Interleukin 12B                           | IL12B     |      | GeneCard |          |
| 212<br>7 | Interleukin 13                            | IL13      |      | GeneCard | DisGenet |
| 212<br>8 | Interleukin 15                            | IL15      |      | GeneCard | DisGenet |
| 212<br>9 | Interleukin 16                            | IL16      |      | GeneCard |          |
| 213<br>0 | Interleukin 17A                           | IL17A     | OMIM | GeneCard | DisGenet |
| 213<br>1 | Interleukin 17B                           | IL17B     |      | GeneCard | DisGenet |
| 213<br>2 | Interleukin 17D                           | IL17D     |      |          | DisGenet |
| 213<br>3 | Interleukin 17F                           | IL17F     |      | GeneCard | DisGenet |
| 213<br>4 | Interleukin 17 Receptor A                 | IL17RA    |      | GeneCard |          |
| 213<br>5 | Interleukin 17 Receptor B                 | IL17RB    |      | GeneCard |          |
| 213<br>6 | Interleukin 17 Receptor C                 | IL17RC    |      | GeneCard |          |
| 213<br>7 | Interleukin-18                            | IL18      | OMIM | GeneCard | DisGenet |
| 213<br>8 | Interleukin 18 Binding Protein            | IL18BP    |      | GeneCard | DisGenet |
| 213<br>9 | Interleukin 18 Receptor 1                 | IL18R1    |      | GeneCard |          |
| 214<br>0 | Interleukin 18 Receptor Accessory Protein | IL18RAP   |      | GeneCard |          |
| 214<br>1 | Interleukin 19                            | IL19      |      | GeneCard | DisGenet |
| 214<br>2 | Interleukin 1 Alpha                       | IL1A      |      | GeneCard | DisGenet |
| 214<br>3 | Interleukin-1, beta                       | IL1B      | OMIM | GeneCard | DisGenet |
| 214<br>4 | Interleukin 1 Family Member 10            | IL1F10    |      |          | DisGenet |

|          |                                                 |          |  |          |          |
|----------|-------------------------------------------------|----------|--|----------|----------|
| 214<br>5 | Interleukin 1 Receptor Type 1                   | IL1R1    |  | GeneCard |          |
| 214<br>6 | Interleukin 1 Receptor Type 2                   | IL1R2    |  | GeneCard |          |
| 214<br>7 | Interleukin 1 Receptor Accessory Protein        | IL1RAP   |  | GeneCard |          |
| 214<br>8 | Interleukin 1 Receptor Accessory Protein Like 2 | IL1RAPL2 |  | GeneCard |          |
| 214<br>9 | Interleukin 1 Receptor Like 1                   | IL1RL1   |  | GeneCard | DisGenet |
| 215<br>0 | Interleukin 1 Receptor Antagonist               | IL1RN    |  | GeneCard | DisGenet |
| 215<br>1 | Interleukin 2                                   | IL2      |  | GeneCard | DisGenet |
| 215<br>2 | Interleukin 20                                  | IL20     |  | GeneCard | DisGenet |
| 215<br>3 | Interleukin 20 Receptor Subunit Alpha           | IL20RA   |  | GeneCard |          |
| 215<br>4 | Interleukin 20 Receptor Subunit Beta            | IL20RB   |  | GeneCard |          |
| 215<br>5 | Interleukin 21                                  | IL21     |  | GeneCard | DisGenet |
| 215<br>6 | Interleukin 21 Receptor                         | IL21R    |  | GeneCard |          |
| 215<br>7 | Interleukin 22                                  | IL22     |  | GeneCard | DisGenet |
| 215<br>8 | Interleukin 22 Receptor Subunit Alpha 1         | IL22RA1  |  | GeneCard |          |
| 215<br>9 | Interleukin 23 Subunit Alpha                    | IL23A    |  | GeneCard | DisGenet |
| 216<br>0 | Interleukin 23 Receptor                         | IL23R    |  | GeneCard | DisGenet |
| 216<br>1 | Interleukin 24                                  | IL24     |  | GeneCard |          |
| 216<br>2 | Interleukin 25                                  | IL25     |  | GeneCard | DisGenet |
| 216<br>3 | Interleukin 26                                  | IL26     |  | GeneCard |          |
| 216<br>4 | Interleukin 27                                  | IL27     |  | GeneCard | DisGenet |

|          |                                                 |         |      |          |          |
|----------|-------------------------------------------------|---------|------|----------|----------|
| 216<br>5 | Interleukin 27 Receptor Subunit Alpha           | IL27RA  |      |          | DisGenet |
| 216<br>6 | Interleukin 2 Receptor Subunit Alpha            | IL2RA   |      | GeneCard | DisGenet |
| 216<br>7 | Interleukin 2 Receptor Subunit Beta             | IL2RB   |      | GeneCard |          |
| 216<br>8 | Interleukin 3                                   | IL3     |      | GeneCard |          |
| 216<br>9 | Interleukin 32                                  | IL32    |      | GeneCard | DisGenet |
| 217<br>0 | Interleukin 33                                  | IL33    |      | GeneCard | DisGenet |
| 217<br>1 | Interleukin 34                                  | IL34    |      | GeneCard | DisGenet |
| 217<br>2 | Interleukin 36 Alpha                            | IL36A   |      | GeneCard |          |
| 217<br>3 | Interleukin 37                                  | IL37    |      | GeneCard | DisGenet |
| 217<br>4 | Interleukin 4                                   | IL4     |      | GeneCard | DisGenet |
| 217<br>5 | Interleukin 4 Receptor                          | IL4R    |      | GeneCard |          |
| 217<br>6 | Interleukin 5                                   | IL5     |      | GeneCard | DisGenet |
| 217<br>7 | Interleukin 5 Receptor Subunit Alpha            | IL5RA   |      | GeneCard |          |
| 217<br>8 | Interleukin-6 (interferon, beta-2)              | IL6     | OMIM | GeneCard | DisGenet |
| 217<br>9 | IL6 Antisense RNA 1                             | IL6-AS1 |      | GeneCard |          |
| 218<br>0 | Interleukin 6 Receptor                          | IL6R    |      | GeneCard | DisGenet |
| 218<br>1 | Interleukin 6 Cytokine Family Signal Transducer | IL6ST   |      | GeneCard | DisGenet |
| 218<br>2 | Interleukin 7                                   | IL7     |      | GeneCard | DisGenet |
| 218<br>3 | Interleukin 7 Receptor                          | IL7R    |      | GeneCard |          |
| 218<br>4 | Interleukin 9                                   | IL9     |      | GeneCard | DisGenet |

|          |                                           |        |      |          |          |
|----------|-------------------------------------------|--------|------|----------|----------|
| 218<br>5 | Interleukin Enhancer Binding Factor 3     | ILF3   |      | GeneCard |          |
| 218<br>6 | Integrin Linked Kinase                    | ILK    |      | GeneCard | DisGenet |
| 218<br>7 | Inner Membrane Mitochondrial Protein      | IMMT   |      | GeneCard |          |
| 218<br>8 | Inhibin Subunit Alpha                     | INHA   |      | GeneCard |          |
| 218<br>9 | Inhibin Subunit Beta A                    | INHBA  |      | GeneCard |          |
| 219<br>0 | INO80 complex, subunit D                  | INO80D | OMIM | GeneCard |          |
| 219<br>1 | Inositol Polyphosphate-5-Phosphatase D    | INPP5D |      | GeneCard | DisGenet |
| 219<br>2 | Inositol Polyphosphate-5-Phosphatase K    | INPP5K |      | GeneCard | DisGenet |
| 219<br>3 | Inositol Polyphosphate Phosphatase Like 1 | INPPL1 |      | GeneCard |          |
| 219<br>4 | Insulin                                   | INS    | OMIM | GeneCard | DisGenet |
| 219<br>5 | Insulin Induced Gene 1                    | INSIG1 |      | GeneCard |          |
| 219<br>6 | Insulin Induced Gene 2                    | INSIG2 |      | GeneCard | DisGenet |
| 219<br>7 | Insulin Like 6                            | INSL6  |      | GeneCard |          |
| 219<br>8 | Insulin Receptor                          | INSR   |      | GeneCard | DisGenet |
| 219<br>9 | Integrator Complex Subunit 12             | INTS12 |      | GeneCard |          |
| 220<br>0 | Inturned Planar Cell Polarity Protein     | INTU   |      |          | DisGenet |
| 220<br>1 | Inversin                                  | INVS   |      | GeneCard |          |
| 220<br>2 | Inositol Hexakisphosphate Kinase 3        | IP6K3  |      | GeneCard |          |
| 220<br>3 | Inositol Polyphosphate Multikinase        | IPMK   |      | GeneCard |          |
| 220<br>4 | Importin 5                                | IPO5   |      | GeneCard |          |



|          |                                                              |          |      |          |          |
|----------|--------------------------------------------------------------|----------|------|----------|----------|
| 220<br>5 | IPO9 Antisense RNA 1                                         | IPO9-AS1 |      | GeneCard |          |
| 220<br>6 | IQ Motif Containing B1                                       | IQCB1    |      | GeneCard |          |
| 220<br>7 | Inositol 1,4,5-Triphosphate Receptor Associated 1            | IRAG1    |      | GeneCard |          |
| 220<br>8 | Interleukin 1 Receptor Associated Kinase 1                   | IRAK1    |      | GeneCard | DisGenet |
| 220<br>9 | Interleukin 1 Receptor Associated Kinase 1 Binding Protein 1 | IRAK1BP1 |      | GeneCard |          |
| 221<br>0 | Interleukin 1 Receptor Associated Kinase 4                   | IRAK4    |      | GeneCard | DisGenet |
| 221<br>1 | Interferon Regulatory Factor 1                               | IRF1     | OMIM | GeneCard | DisGenet |
| 221<br>2 | IRF1 Antisense RNA 1                                         | IRF1-AS1 |      | GeneCard |          |
| 221<br>3 | Interferon Regulatory Factor 2                               | IRF2     |      |          | DisGenet |
| 221<br>4 | Interferon Regulatory Factor 2 Binding Protein 2             | IRF2BP2  |      | GeneCard | DisGenet |
| 221<br>5 | Interferon Regulatory Factor 3                               | IRF3     |      | GeneCard | DisGenet |
| 221<br>6 | Interferon Regulatory Factor 4                               | IRF4     |      | GeneCard |          |
| 221<br>7 | Interferon Regulatory Factor 5                               | IRF5     |      | GeneCard | DisGenet |
| 221<br>8 | interferon regulatory factor 6                               | IRF6     |      |          | DisGenet |
| 221<br>9 | Interferon Regulatory Factor 7                               | IRF7     |      | GeneCard |          |
| 222<br>0 | Interferon Regulatory Factor 8                               | IRF8     |      | GeneCard | DisGenet |
| 222<br>1 | Interferon Regulatory Factor 9                               | IRF9     |      | GeneCard |          |
| 222<br>2 | Immunity Related GTPase M                                    | IRGM     |      | GeneCard | DisGenet |
| 222<br>3 | Insulin Receptor Substrate 1                                 | IRS1     | OMIM | GeneCard | DisGenet |
| 222<br>4 | Insulin Receptor Substrate 2                                 | IRS2     |      |          | DisGenet |

|          |                                           |          |  |          |          |
|----------|-------------------------------------------|----------|--|----------|----------|
| 222<br>5 | ISG15 Ubiquitin Like Modifier             | ISG15    |  | GeneCard |          |
| 222<br>6 | Interferon Stimulated Exonuclease Gene 20 | ISG20    |  |          | DisGenet |
| 222<br>7 | ISL LIM Homeobox 1                        | ISL1     |  | GeneCard |          |
| 222<br>8 | Isthmin 1                                 | ISM1     |  | GeneCard |          |
| 222<br>9 | Integrin Subunit Alpha 1                  | ITGA1    |  | GeneCard |          |
| 223<br>0 | Integrin Subunit Alpha 11                 | ITGA11   |  | GeneCard |          |
| 223<br>1 | Integrin Subunit Alpha 2                  | ITGA2    |  | GeneCard | DisGenet |
| 223<br>2 | Integrin Subunit Alpha 2b                 | ITGA2B   |  | GeneCard | DisGenet |
| 223<br>3 | Integrin Subunit Alpha 3                  | ITGA3    |  | GeneCard |          |
| 223<br>4 | Integrin Subunit Alpha 4                  | ITGA4    |  | GeneCard |          |
| 223<br>5 | Integrin Subunit Alpha 5                  | ITGA5    |  | GeneCard | DisGenet |
| 223<br>6 | Integrin Subunit Alpha 6                  | ITGA6    |  | GeneCard |          |
| 223<br>7 | Integrin Subunit Alpha D                  | ITGAD    |  | GeneCard | DisGenet |
| 223<br>8 | Integrin Subunit Alpha E                  | ITGAE    |  |          | DisGenet |
| 223<br>9 | Integrin Subunit Alpha L                  | ITGAL    |  | GeneCard | DisGenet |
| 224<br>0 | Integrin Subunit Alpha M                  | ITGAM    |  | GeneCard | DisGenet |
| 224<br>1 | Integrin Subunit Alpha V                  | ITGAV    |  | GeneCard | DisGenet |
| 224<br>2 | Integrin Subunit Alpha X                  | ITGAX    |  | GeneCard | DisGenet |
| 224<br>3 | Integrin Subunit Beta 1                   | ITGB1    |  | GeneCard |          |
| 224<br>4 | Integrin Subunit Beta 1 Binding Protein 2 | ITGB1BP2 |  | GeneCard |          |

|          |                                              |        |      |          |          |
|----------|----------------------------------------------|--------|------|----------|----------|
| 224<br>5 | Integrin Subunit Beta 2                      | ITGB2  |      | GeneCard | DisGenet |
| 224<br>6 | Integrin Subunit Beta 3                      | ITGB3  |      | GeneCard | DisGenet |
| 224<br>7 | Integrin Subunit Beta 4                      | ITGB4  |      | GeneCard | DisGenet |
| 224<br>8 | Integrin Subunit Beta 5                      | ITGB5  |      | GeneCard | DisGenet |
| 224<br>9 | Integrin Subunit Beta 7                      | ITGB7  | OMIM |          |          |
| 225<br>0 | Inter-Alpha-Trypsin Inhibitor Heavy Chain 1  | ITIH1  |      | GeneCard |          |
| 225<br>1 | Inter-Alpha-Trypsin Inhibitor Heavy Chain 3  | ITIH3  |      | GeneCard |          |
| 225<br>2 | Inter-Alpha-Trypsin Inhibitor Heavy Chain 4  | ITIH4  |      | GeneCard | DisGenet |
| 225<br>3 | Intelectin 1                                 | ITLN1  |      | GeneCard |          |
| 225<br>4 | Integral Membrane Protein 2B                 | ITM2B  |      | GeneCard |          |
| 225<br>5 | Inositol-Trisphosphate 3-Kinase C            | ITPKC  |      | GeneCard |          |
| 225<br>6 | Inositol 1,4,5-Trisphosphate Receptor Type 1 | ITPR1  |      | GeneCard | DisGenet |
| 225<br>7 | Inositol 1,4,5-Trisphosphate Receptor Type 2 | ITPR2  |      |          | DisGenet |
| 225<br>8 | Inositol 1,4,5-Trisphosphate Receptor Type 3 | ITPR3  |      | GeneCard | DisGenet |
| 225<br>9 | Isovaleryl-CoA Dehydrogenase                 | IVD    |      |          | DisGenet |
| 226<br>0 | Iodotyrosine Deiodinase                      | IYD    |      | GeneCard |          |
| 226<br>1 | Izumo Sperm-Egg Fusion 1                     | IZUMO1 |      | GeneCard |          |
| 226<br>2 | Jagged Canonical Notch Ligand 1              | JAG1   |      | GeneCard | DisGenet |
| 226<br>3 | Janus Kinase 1                               | JAK1   |      | GeneCard |          |
| 226<br>4 | Janus Kinase 2                               | JAK2   |      | GeneCard | DisGenet |

|          |                                                                          |         |      |          |          |
|----------|--------------------------------------------------------------------------|---------|------|----------|----------|
| 226<br>5 | Janus Kinase 3                                                           | JAK3    |      | GeneCard |          |
| 226<br>6 | Junctional Adhesion Molecule 3                                           | JAM3    |      | GeneCard | DisGenet |
| 226<br>7 | Junction Adhesion Molecule Like                                          | JAML    |      | GeneCard |          |
| 226<br>8 | JAZF Zinc Finger 1                                                       | JAZF1   |      | GeneCard |          |
| 226<br>9 | Junctional Cadherin 5 Associated                                         | JCAD    |      | GeneCard | DisGenet |
| 227<br>0 | Jun Dimerization Protein 2                                               | JDP2    |      | GeneCard |          |
| 227<br>1 | Jumonji Domain Containing 1C                                             | JMJD1C  |      | GeneCard |          |
| 227<br>2 | Jumonji Domain Containing 6, Arginine Demethylase And Lysine Hydroxylase | JMJD6   |      | GeneCard |          |
| 227<br>3 | Junctophilin 1                                                           | JPH1    |      | GeneCard |          |
| 227<br>4 | Junctophilin 2                                                           | JPH2    |      | GeneCard |          |
| 227<br>5 | Junctophilin 3                                                           | JPH3    |      | GeneCard | DisGenet |
| 227<br>6 | Jun Proto-Oncogene, AP-1 Transcription Factor Subunit                    | JUN     |      | GeneCard | DisGenet |
| 227<br>7 | JunB Proto-Oncogene, AP-1 Transcription Factor Subunit                   | JUNB    |      |          | DisGenet |
| 227<br>8 | JunD Proto-Oncogene, AP-1 Transcription Factor Subunit                   | JUND    |      |          | DisGenet |
| 227<br>9 | Junction Plakoglobin                                                     | JUP     |      | GeneCard | DisGenet |
| 228<br>0 | Kalirin RhoGEF Kinase                                                    | KALRN   | OMIM | GeneCard | DisGenet |
| 228<br>1 | KN Motif And Ankyrin Repeat Domains 1                                    | KANK1   |      | GeneCard |          |
| 228<br>2 | Lysine Acetyltransferase 2B                                              | KAT2B   |      | GeneCard |          |
| 228<br>3 | Lysine Acetyltransferase 5                                               | KAT5    |      |          | DisGenet |
| 228<br>4 | Katanin Catalytic Subunit A1 Like 1                                      | KATNAL1 |      | GeneCard |          |

|          |                                                                  |        |  |          |          |
|----------|------------------------------------------------------------------|--------|--|----------|----------|
| 228<br>5 | Kelch Repeat and BTB Domain Containing 3                         | KBTBD3 |  | GeneCard |          |
| 228<br>6 | Keratoconus Gene 6                                               | KC6    |  | GeneCard |          |
| 228<br>7 | Potassium Voltage-Gated Channel Subfamily A Member 1             | KCNA1  |  | GeneCard |          |
| 228<br>8 | Potassium Voltage-Gated Channel Subfamily A Member 2             | KCNA2  |  | GeneCard |          |
| 228<br>9 | Potassium Voltage-Gated Channel Subfamily A Member 3             | KCNA3  |  | GeneCard |          |
| 229<br>0 | Potassium Voltage-Gated Channel Subfamily A Member 5             | KCNA5  |  | GeneCard |          |
| 229<br>1 | Potassium Voltage-Gated Channel Subfamily E Regulatory Subunit 1 | KCNE1  |  | GeneCard |          |
| 229<br>2 | Potassium Voltage-Gated Channel Subfamily E Regulatory Subunit 2 | KCNE2  |  | GeneCard | DisGenet |
| 229<br>3 | Potassium Voltage-Gated Channel Subfamily H Member 2             | KCNH2  |  | GeneCard |          |
| 229<br>4 | Potassium Voltage-Gated Channel Subfamily H Member 4             | KCNH4  |  |          | DisGenet |
| 229<br>5 | Potassium Voltage-Gated Channel Subfamily H Member 5             | KCNH5  |  | GeneCard |          |
| 229<br>6 | Potassium Voltage-Gated Channel Subfamily H Member 8             | KCNH8  |  |          | DisGenet |
| 229<br>7 | Potassium Voltage-Gated Channel Interacting Protein 1            | KCNIP1 |  | GeneCard |          |
| 229<br>8 | Potassium Voltage-Gated Channel Interacting Protein 2            | KCNIP2 |  | GeneCard |          |
| 229<br>9 | Potassium Inwardly Rectifying Channel Subfamily J Member 1       | KCNJ1  |  | GeneCard |          |
| 230<br>0 | Potassium Inwardly Rectifying Channel Subfamily J Member 11      | KCNJ11 |  | GeneCard | DisGenet |
| 230<br>1 | Potassium Inwardly Rectifying Channel Subfamily J Member 12      | KCNJ12 |  | GeneCard |          |
| 230<br>2 | Potassium Inwardly Rectifying Channel Subfamily J Member 2       | KCNJ2  |  | GeneCard |          |
| 230<br>3 | Potassium Inwardly Rectifying Channel Subfamily J Member 5       | KCNJ5  |  | GeneCard |          |
| 230<br>4 | Potassium Inwardly Rectifying Channel Subfamily J Member 8       | KCNJ8  |  | GeneCard |          |

|          |                                                                           |          |  |          |          |
|----------|---------------------------------------------------------------------------|----------|--|----------|----------|
| 230<br>5 | Potassium Two Pore Domain Channel Subfamily K Member 1                    | KCNK1    |  | GeneCard |          |
| 230<br>6 | Potassium Two Pore Domain Channel Subfamily K Member 13                   | KCNK13   |  | GeneCard |          |
| 230<br>7 | Potassium Two Pore Domain Channel Subfamily K Member 2                    | KCNK2    |  | GeneCard |          |
| 230<br>8 | Potassium Two Pore Domain Channel Subfamily K Member 3                    | KCNK3    |  | GeneCard |          |
| 230<br>9 | Potassium Two Pore Domain Channel Subfamily K Member 9                    | KCNK9    |  | GeneCard |          |
| 231<br>0 | Potassium Calcium-Activated Channel Subfamily M Alpha 1                   | KCNMA1   |  | GeneCard |          |
| 231<br>1 | Potassium Calcium-Activated Channel Subfamily M Regulatory Beta Subunit 1 | KCNMB1   |  | GeneCard | DisGenet |
| 231<br>2 | Potassium Calcium-Activated Channel Subfamily N Member 3                  | KCNN3    |  | GeneCard |          |
| 231<br>3 | Potassium Calcium-Activated Channel Subfamily N Member 4                  | KCNN4    |  | GeneCard |          |
| 231<br>4 | Potassium Voltage-Gated Channel Subfamily Q Member 1                      | KCNQ1    |  | GeneCard |          |
| 231<br>5 | KCNQ1 Opposite Strand/Antisense Transcript 1                              | KCNQ1OT1 |  | GeneCard |          |
| 231<br>6 | Potassium Voltage-Gated Channel Subfamily Q Member 3                      | KCNQ3    |  | GeneCard |          |
| 231<br>7 | Potassium Voltage-Gated Channel Modifier Subfamily V Member 2             | KCNV2    |  | GeneCard |          |
| 231<br>8 | Potassium Channel Tetramerization Domain Containing 15                    | KCTD15   |  |          | DisGenet |
| 231<br>9 | Lysine Demethylase 1A                                                     | KDM1A    |  | GeneCard |          |
| 232<br>0 | Lysine Demethylase 4A                                                     | KDM4A    |  |          | DisGenet |
| 232<br>1 | Lysine Demethylase 4C                                                     | KDM4C    |  | GeneCard |          |
| 232<br>2 | Lysine Demethylase 5B                                                     | KDM5B    |  | GeneCard |          |
| 232<br>3 | Lysine Demethylase 5D                                                     | KDM5D    |  | GeneCard | DisGenet |
| 232<br>4 | Lysine Demethylase 6B                                                     | KDM6B    |  | GeneCard | DisGenet |

|          |                                                                                       |           |      |          |          |
|----------|---------------------------------------------------------------------------------------|-----------|------|----------|----------|
| 232<br>5 | Kinase Insert Domain Receptor                                                         | KDR       |      | GeneCard | DisGenet |
| 232<br>6 | Kelch Like ECH Associated Protein 1                                                   | KEAP1     |      | GeneCard |          |
| 232<br>7 | Keratocan                                                                             | KERA      |      | GeneCard | DisGenet |
| 232<br>8 | KH RNA Binding Domain Containing, Signal Transduction Associated 1                    | KHDRBS1   |      | GeneCard | DisGenet |
| 232<br>9 | Ketohexokinase                                                                        | KHK       |      | GeneCard |          |
| 233<br>0 | KH-Type Splicing Regulatory Protein                                                   | KHSRP     |      | GeneCard |          |
| 233<br>1 | KIAA0319 Like                                                                         | KIAA0319L |      | GeneCard |          |
| 233<br>2 | Kinesin Family Member 11                                                              | KIF11     |      | GeneCard |          |
| 233<br>3 | Kinesin Family Member 13B                                                             | KIF13B    |      | GeneCard |          |
| 233<br>4 | Kinesin Family Member 20A                                                             | KIF20A    | OMIM | GeneCard |          |
| 233<br>5 | Kinesin Family Member 3A                                                              | KIF3A     |      | GeneCard |          |
| 233<br>6 | Kinesin Family Member 5A                                                              | KIF5A     |      | GeneCard |          |
| 233<br>7 | Kinesin Family Member 6                                                               | KIF6      |      | GeneCard | DisGenet |
| 233<br>8 | Killer Cell Immunoglobulin Like Receptor, Two Ig Domains And Short Cytoplasmic Tail 1 | KIR2DS1   |      | GeneCard |          |
| 233<br>9 | KiSS-1 Metastasis Suppressor                                                          | KISS1     |      | GeneCard | DisGenet |
| 234<br>0 | KISS1 Receptor                                                                        | KISS1R    |      | GeneCard | DisGenet |
| 234<br>1 | KIT Proto-Oncogene, Receptor Tyrosine Kinase                                          | KIT       |      | GeneCard | DisGenet |
| 234<br>2 | KIT Ligand                                                                            | KITLG     |      | GeneCard |          |
| 234<br>3 | Klotho                                                                                | KL        | OMIM | GeneCard | DisGenet |
| 234<br>4 | Kruppel Like Factor 10                                                                | KLF10     |      | GeneCard |          |

|          |                                     |             |  |          |          |
|----------|-------------------------------------|-------------|--|----------|----------|
| 234<br>5 | Kruppel Like Factor 14              | KLF14       |  | GeneCard | DisGenet |
| 234<br>6 | Kruppel Like Factor 15              | KLF15       |  | GeneCard | DisGenet |
| 234<br>7 | Kruppel Like Factor 2               | KLF2        |  | GeneCard | DisGenet |
| 234<br>8 | Kruppel Like Factor 3               | KLF3        |  | GeneCard |          |
| 234<br>9 | Kruppel Like Factor 4               | KLF4        |  | GeneCard | DisGenet |
| 235<br>0 | Kruppel Like Factor 5               | KLF5        |  | GeneCard | DisGenet |
| 235<br>1 | Kruppel Like Factor 6               | KLF6        |  | GeneCard |          |
| 235<br>2 | Kelch Like Family Member 12         | KLHL12      |  | GeneCard |          |
| 235<br>3 | Kelch Like Family Member 2          | KLHL2       |  | GeneCard |          |
| 235<br>4 | Kallikrein 1                        | KLK1        |  | GeneCard | DisGenet |
| 235<br>5 | Kallikrein Related Peptidase 15     | KLK15       |  | GeneCard |          |
| 235<br>6 | Kallikrein Related Peptidase 3      | KLK3        |  | GeneCard | DisGenet |
| 235<br>7 | Kallikrein B1                       | KLKB1       |  | GeneCard |          |
| 235<br>8 | Killer Cell Lectin Like Receptor C1 | KLRC1       |  | GeneCard |          |
| 235<br>9 | Killer Cell Lectin Like Receptor C2 | KLRC2       |  | GeneCard |          |
| 236<br>0 | Killer Cell Lectin Like Receptor C4 | KLRC4       |  | GeneCard |          |
| 236<br>1 | KLRC4-KLRK1 readthrough             | KLRC4-KLRK1 |  |          | DisGenet |
| 236<br>2 | Killer Cell Lectin Like Receptor D1 | KLRD1       |  | GeneCard |          |
| 236<br>3 | Killer Cell Lectin Like Receptor G1 | KLRG1       |  |          | DisGenet |
| 236<br>4 | Killer Cell Lectin Like Receptor K1 | KLRK1       |  | GeneCard | DisGenet |



|          |                                            |           |  |          |          |
|----------|--------------------------------------------|-----------|--|----------|----------|
| 236<br>5 | Lysine Methyltransferase 2A                | KMT2A     |  |          | DisGenet |
| 236<br>6 | Lysine Methyltransferase 2B                | KMT2B     |  |          | DisGenet |
| 236<br>7 | Lysine Methyltransferase 2D                | KMT2D     |  |          | DisGenet |
| 236<br>8 | Lysine Methyltransferase 2E                | KMT2E     |  |          | DisGenet |
| 236<br>9 | Lysine Methyltransferase 5B                | KMT5B     |  | GeneCard |          |
| 237<br>0 | Lysine Methyltransferase 5C                | KMT5C     |  | GeneCard |          |
| 237<br>1 | Kininogen 1                                | KNG1      |  | GeneCard | DisGenet |
| 237<br>2 | Kinetochore Associated 1                   | KNTC1     |  | GeneCard |          |
| 237<br>3 | Karyopherin Subunit Alpha 2                | KPNA2     |  | GeneCard |          |
| 237<br>4 | Karyopherin Subunit Alpha 3                | KPNA3     |  | GeneCard | DisGenet |
| 237<br>5 | Karyopherin Subunit Alpha 4                | KPNA4     |  | GeneCard | DisGenet |
| 237<br>6 | KRAB Box Domain Containing 4               | KRBOX4    |  | GeneCard |          |
| 237<br>7 | Kringle Containing Transmembrane Protein 1 | KREMEN1   |  | GeneCard |          |
| 237<br>8 | KRIT1 Ankyrin Repeat Containing            | KRIT1     |  | GeneCard | DisGenet |
| 237<br>9 | Keratin 18                                 | KRT18     |  | GeneCard |          |
| 238<br>0 | Keratin 20                                 | KRT20     |  |          | DisGenet |
| 238<br>1 | Keratin 74                                 | KRT74     |  | GeneCard |          |
| 238<br>2 | Keratin 8                                  | KRT8      |  | GeneCard |          |
| 238<br>3 | Keratin Associated Protein 11-1            | KRTAP11-1 |  | GeneCard |          |
| 238<br>4 | Lactamase Beta                             | LACTB     |  | GeneCard |          |

|          |                                                     |          |  |          |          |
|----------|-----------------------------------------------------|----------|--|----------|----------|
| 238<br>5 | Ladinin 1                                           | LAD1     |  |          | DisGenet |
| 238<br>6 | Lymphocyte Activating 3                             | LAG3     |  | GeneCard | DisGenet |
| 238<br>7 | Leukocyte associated immunoglobulin like receptor 1 | LAIR1    |  |          | DisGenet |
| 238<br>8 | Laminin Subunit Alpha 2                             | LAMA2    |  | GeneCard |          |
| 238<br>9 | Laminin Subunit Alpha 3                             | LAMA3    |  | GeneCard |          |
| 239<br>0 | Laminin Subunit Alpha 4                             | LAMA4    |  | GeneCard |          |
| 239<br>1 | Laminin Subunit Gamma 1                             | LAMC1    |  | GeneCard |          |
| 239<br>2 | Lysosomal Associated Membrane Protein 2             | LAMP2    |  | GeneCard |          |
| 239<br>3 | LanC Like 1                                         | LANCL1   |  |          | DisGenet |
| 239<br>4 | LARGE Xylosyl- And Glucuronyltransferase 1          | LARGE1   |  | GeneCard |          |
| 239<br>5 | LARP1B Pseudogene 2                                 | LARP1BP2 |  |          | DisGenet |
| 239<br>6 | La Ribonucleoprotein 6, Translational Regulator     | LARP6    |  | GeneCard |          |
| 239<br>7 | La Ribonucleoprotein 7, Transcriptional Regulator   | LARP7    |  | GeneCard |          |
| 239<br>8 | Leucyl-TRNA Synthetase 1                            | LARS1    |  | GeneCard |          |
| 239<br>9 | Leucyl-TRNA Synthetase 2, Mitochondrial             | LARS2    |  | GeneCard |          |
| 240<br>0 | LIM And SH3 Protein 1                               | LASP1    |  | GeneCard |          |
| 240<br>1 | Lipopolysaccharide Binding Protein                  | LBP      |  | GeneCard | DisGenet |
| 240<br>2 | Lamin B Receptor                                    | LBR      |  | GeneCard |          |
| 240<br>3 | Ladybird Homeobox 1                                 | LBX1     |  | GeneCard |          |
| 240<br>4 | Lecithin-Cholesterol Acyltransferase                | LCAT     |  | GeneCard | DisGenet |

|          |                                                    |          |      |          |          |
|----------|----------------------------------------------------|----------|------|----------|----------|
| 240<br>5 | LCK Proto-Oncogene, Src Family Tyrosine Kinase     | LCK      |      | GeneCard |          |
| 240<br>6 | Lipocalin 1                                        | LCN1     |      | GeneCard |          |
| 240<br>7 | Lipocalin 2                                        | LCN2     |      | GeneCard | DisGenet |
| 240<br>8 | Ligand Dependent Nuclear Receptor Corepressor      | LCOR     |      |          | DisGenet |
| 240<br>9 | Lactase (lactase-phlorizin hydrolase)              | LCT      | OMIM | GeneCard |          |
| 241<br>0 | Lipid Droplet Associated Hydrolase                 | LDAH     |      | GeneCard |          |
| 241<br>1 | LIM Domain Binding 2                               | LDB2     |      | GeneCard | DisGenet |
| 241<br>2 | LIM Domain Binding 3                               | LDB3     |      | GeneCard |          |
| 241<br>3 | Lactate Dehydrogenase A                            | LDHA     |      | GeneCard | DisGenet |
| 241<br>4 | Lactate Dehydrogenase C                            | LDHC     |      | GeneCard |          |
| 241<br>5 | Low-Density Lipoprotein Receptor                   | LDLR     |      | GeneCard | DisGenet |
| 241<br>6 | Low-density lipoprotein receptor adaptor protein 1 | LDLRAP1  | OMIM | GeneCard | DisGenet |
| 241<br>7 | LDLR Antisense RNA 1                               | LDLR-AS1 |      | GeneCard |          |
| 241<br>8 | Leukocyte Cell Derived Chemotaxin 2                | LECT2    |      | GeneCard | DisGenet |
| 241<br>9 | Lymphoid Enhancer Binding Factor 1                 | LEF1     |      | GeneCard |          |
| 242<br>0 | LEF1 Antisense RNA 1                               | LEF1-AS1 |      | GeneCard | DisGenet |
| 242<br>1 | Leucine, Glutamate and Lysine Rich 1               | LEKR1    |      | GeneCard |          |
| 242<br>2 | Late Cornified Envelope Like Proline Rich 1        | LELP1    |      | GeneCard |          |
| 242<br>3 | LEM Domain Nuclear Envelope Protein 2              | LEMD2    | OMIM | GeneCard |          |
| 242<br>4 | Leptin (murine obesity homolog)                    | LEP      | OMIM | GeneCard | DisGenet |

|          |                                                 |          |  |          |          |
|----------|-------------------------------------------------|----------|--|----------|----------|
| 242<br>5 | Leptin Serum Levels                             | LEPQTL1  |  | GeneCard | DisGenet |
| 242<br>6 | Leptin Receptor                                 | LEPR     |  | GeneCard | DisGenet |
| 242<br>7 | Leptin Receptor Overlapping Transcript          | LEPROT   |  | GeneCard |          |
| 242<br>8 | Galectin 1                                      | LGALS1   |  | GeneCard |          |
| 242<br>9 | Galectin 12                                     | LGALS12  |  | GeneCard |          |
| 243<br>0 | Galectin 14                                     | LGALS14  |  |          | DisGenet |
| 243<br>1 | Galectin 2                                      | LGALS2   |  | GeneCard |          |
| 243<br>2 | Galectin 3                                      | LGALS3   |  | GeneCard |          |
| 243<br>3 | Galectin 3 Binding Protein                      | LGALS3BP |  | GeneCard | DisGenet |
| 243<br>4 | Galectin 8                                      | LGALS8   |  | GeneCard |          |
| 243<br>5 | Galectin 9                                      | LGALS9   |  | GeneCard |          |
| 243<br>6 | Legumain                                        | LGMN     |  | GeneCard | DisGenet |
| 243<br>7 | Luteinizing Hormone/Choriogonadotropin Receptor | LHCGR    |  | GeneCard |          |
| 243<br>8 | LHFPL Tetraspan Subfamily Member 1              | LHFPL1   |  | GeneCard |          |
| 243<br>9 | LIM Homeobox 8                                  | LHX8     |  | GeneCard |          |
| 244<br>0 | Lipoic Acid Synthetase                          | LIAS     |  | GeneCard |          |
| 244<br>1 | LIF Interleukin 6 Family Cytokine               | LIF      |  | GeneCard | DisGenet |
| 244<br>2 | LIF Receptor Subunit Alpha                      | LIFR     |  | GeneCard |          |
| 244<br>3 | DNA Ligase 4                                    | LIG4     |  | GeneCard |          |
| 244<br>4 | Leukocyte Immunoglobulin Like Receptor B1       | LILRB1   |  | GeneCard | DisGenet |

|          |                                             |           |  |          |          |
|----------|---------------------------------------------|-----------|--|----------|----------|
| 244<br>5 | Leukocyte Immunoglobulin Like Receptor B3   | LILRB3    |  | GeneCard |          |
| 244<br>6 | Leukocyte Immunoglobulin Like Receptor B4   | LILRB4    |  |          | DisGenet |
| 244<br>7 | LIM Domain Kinase 1                         | LIMK1     |  | GeneCard |          |
| 244<br>8 | LIM Zinc Finger Domain Containing 1         | LIMS1     |  | GeneCard |          |
| 244<br>9 | LIM Zinc Finger Domain Containing 2         | LIMS2     |  | GeneCard |          |
| 245<br>0 | Lin-28 Homolog A                            | LIN28A    |  | GeneCard |          |
| 245<br>1 | Lin-28 Homolog B                            | LIN28B    |  | GeneCard |          |
| 245<br>2 | Lin-9 DREAM MuvB Core Complex Component     | LIN9      |  | GeneCard |          |
| 245<br>3 | Long Intergenic Non-Protein Coding RNA 113  | LINC00113 |  | GeneCard |          |
| 245<br>4 | Long Intergenic Non-Protein Coding RNA 294  | LINC00294 |  | GeneCard |          |
| 245<br>5 | Long Intergenic Non-Protein Coding RNA 299  | LINC00299 |  | GeneCard | DisGenet |
| 245<br>6 | Long Intergenic Non-Protein Coding RNA 305  | LINC00305 |  | GeneCard | DisGenet |
| 245<br>7 | Long Intergenic Non-Protein Coding RNA 400  | LINC00400 |  | GeneCard |          |
| 245<br>8 | Long Intergenic Non-Protein Coding RNA 540  | LINC00540 |  | GeneCard |          |
| 245<br>9 | Long Intergenic Non-Protein Coding RNA 599  | LINC00599 |  |          | DisGenet |
| 246<br>0 | Long Intergenic Non-Protein Coding RNA 907  | LINC00907 |  | GeneCard |          |
| 246<br>1 | Long Intergenic Non-Protein Coding RNA 1005 | LINC01005 |  | GeneCard |          |
| 246<br>2 | Long Intergenic Non-Protein Coding RNA 1123 | LINC01123 |  | GeneCard |          |
| 246<br>3 | Long Intergenic Non-Protein Coding RNA 1179 | LINC01179 |  | GeneCard |          |
| 246<br>4 | Long Intergenic Non-Protein Coding RNA 1194 | LINC01194 |  |          | DisGenet |

|          |                                                                    |           |      |          |          |
|----------|--------------------------------------------------------------------|-----------|------|----------|----------|
| 246<br>5 | Long Intergenic Non-Protein Coding RNA 1228                        | LINC01228 |      | GeneCard |          |
| 246<br>6 | Long Intergenic Non-Protein Coding RNA 1389                        | LINC01389 |      | GeneCard |          |
| 246<br>7 | Long Intergenic Non-Protein Coding RNA 1512                        | LINC01512 |      | GeneCard |          |
| 246<br>8 | Long Intergenic Non-Protein Coding RNA 1535                        | LINC01535 |      | GeneCard |          |
| 246<br>9 | Long Intergenic Non-Protein Coding RNA 1672                        | LINC01672 |      |          | DisGenet |
| 247<br>0 | Long Intergenic Non-Protein Coding RNA 1826                        | LINC01826 |      | GeneCard |          |
| 247<br>1 | Long Intergenic Non-Protein Coding RNA 1912                        | LINC01912 |      | GeneCard |          |
| 247<br>2 | Long Intergenic Non-Protein Coding RNA 2370                        | LINC02370 |      | GeneCard |          |
| 247<br>3 | Long Intergenic Non-Protein Coding RNA 2398                        | LINC02398 |      | GeneCard |          |
| 247<br>4 | Long Intergenic Non-Protein Coding RNA 2577                        | LINC02577 |      | GeneCard |          |
| 247<br>5 | Long Intergenic Non-Protein Coding RNA 2605                        | LINC02605 |      |          | DisGenet |
| 247<br>6 | Long Intergenic Non-Protein Coding RNA 2618                        | LINC02618 |      | GeneCard |          |
| 247<br>7 | Long Intergenic Non-Protein Coding RNA 2692                        | LINC02692 |      | GeneCard |          |
| 247<br>8 | Long Intergenic Non-Protein Coding RNA 2915                        | LINC02915 |      | GeneCard |          |
| 247<br>9 | Long Intergenic Non-Protein Coding RNA 2962                        | LINC02962 |      | GeneCard |          |
| 248<br>0 | Long Intergenic Non-Protein Coding RNA 3020                        | LINC03020 |      | GeneCard |          |
| 248<br>1 | Long Intergenic Non-Protein Coding RNA 3040                        | LINC03040 |      | GeneCard |          |
| 248<br>2 | Long Intergenic Non-Protein Coding RNA, Regulator Of Reprogramming | LINC-ROR  |      |          | DisGenet |
| 248<br>3 | Lipase A, lysosomal acid, cholesterol esterase                     | LIPA      | OMIM | GeneCard | DisGenet |
| 248<br>4 | Lipase C, Hepatic Type                                             | LIPC      |      | GeneCard | DisGenet |

|          |                                          |       |      |          |          |
|----------|------------------------------------------|-------|------|----------|----------|
| 248<br>5 | Lipase E, Hormone Sensitive Type         | LIPE  |      | GeneCard | DisGenet |
| 248<br>6 | Lipase F, Gastric Type                   | LIPF  |      | GeneCard |          |
| 248<br>7 | Lipase G, Endothelial Type               | LIPG  |      | GeneCard | DisGenet |
| 248<br>8 | Lipase H                                 | LIPH  |      | GeneCard |          |
| 248<br>9 | Lipase I                                 | LIPI  |      | GeneCard |          |
| 249<br>0 | Lipase Family Member J                   | LIPJ  |      | GeneCard |          |
| 249<br>1 | Lipase Family Member K                   | LIPK  |      | GeneCard |          |
| 249<br>2 | Lipase Family Member M                   | LIPM  |      | GeneCard |          |
| 249<br>3 | Lipopolysaccharide Induced TNF Factor    | LITAF |      | GeneCard |          |
| 249<br>4 | Lectin, Mannose Binding 1                | LMAN1 |      | GeneCard |          |
| 249<br>5 | Lectin, Mannose Binding 2                | LMAN2 |      | GeneCard |          |
| 249<br>6 | LIM And Cysteine Rich Domains 1          | LMCD1 |      | GeneCard |          |
| 249<br>7 | Lipase Maturation Factor 1               | LMF1  |      | GeneCard |          |
| 249<br>8 | Lipase Maturation Factor 2               | LMF2  |      | GeneCard |          |
| 249<br>9 | Lamin A/C                                | LMNA  | OMIM | GeneCard | DisGenet |
| 250<br>0 | Lamin B1                                 | LMNB1 |      | GeneCard | DisGenet |
| 250<br>1 | LIM Domain 7                             | LMO7  |      | GeneCard |          |
| 250<br>2 | Leiomodlin 1                             | LMOD1 |      | GeneCard | DisGenet |
| 250<br>3 | Leiomodlin 2                             | LMOD2 |      | GeneCard |          |
| 250<br>4 | LIM Homeobox Transcription Factor 1 Beta | LMX1B |      | GeneCard |          |

|          |                                                               |              |  |          |          |
|----------|---------------------------------------------------------------|--------------|--|----------|----------|
| 250<br>5 | LncRNA Regulator of Akt Signaling Associated With HCC And RCC | LNCARSR      |  | GeneCard |          |
| 250<br>6 | LncRNA Neighboring Enhancer of FOXA2                          | LNCNEF       |  | GeneCard |          |
| 250<br>7 | LncRNA Activated By TGF-Beta                                  | LNCRNA-ATB   |  | GeneCard | DisGenet |
| 250<br>8 | Lunapark, ER Junction Formation Factor                        | LNPK         |  | GeneCard |          |
| 250<br>9 | Uracil DNA Glycosylase Pseudogene                             | LOC100130177 |  | GeneCard |          |
| 251<br>0 | Uncharacterized LOC100287329                                  | LOC100287329 |  | GeneCard |          |
| 251<br>1 | Uncharacterized LOC100506472                                  | LOC100506472 |  | GeneCard |          |
| 251<br>2 | Uncharacterized LOC100507053                                  | LOC100507053 |  | GeneCard |          |
| 251<br>3 | Uncharacterized LOC100507346                                  | LOC100507346 |  | GeneCard |          |
| 251<br>4 | Uncharacterized LOC101927055                                  | LOC101927055 |  | GeneCard |          |
| 251<br>5 | Inactive Glutathione Hydrolase 2                              | LOC102724197 |  |          | DisGenet |
| 251<br>6 | Uncharacterized LOC102724465                                  | LOC102724465 |  | GeneCard |          |
| 251<br>7 | Uncharacterized LOC102724802                                  | LOC102724802 |  | GeneCard |          |
| 251<br>8 | Uncharacterized LOC105377143                                  | LOC105377143 |  | GeneCard |          |
| 251<br>9 | APOB 5' Regulatory Region                                     | LOC106560211 |  | GeneCard |          |
| 252<br>0 | GBA Recombination Region                                      | LOC106627981 |  | GeneCard |          |
| 252<br>1 | Adiponectin Enhancer Region                                   | LOC106660625 |  | GeneCard |          |
| 252<br>2 | MPO Proximal Enhancer and Promoter Region                     | LOC106694315 |  | GeneCard |          |
| 252<br>3 | LEP 5' Regulatory Region                                      | LOC106728418 |  | GeneCard |          |
| 252<br>4 | Tenascin XB Recombination Region                              | LOC106780803 |  | GeneCard |          |



|          |                                                                      |              |  |          |          |
|----------|----------------------------------------------------------------------|--------------|--|----------|----------|
| 252<br>5 | MANTIS                                                               | LOC107985770 |  | GeneCard | DisGenet |
| 252<br>6 | Enhancer-Blocking Element 11-1-2 Overlapping APOA5                   | LOC108491825 |  | GeneCard |          |
| 252<br>7 | FGF1 Promoter B                                                      | LOC109113859 |  | GeneCard |          |
| 252<br>8 | FGF1 Promoter C                                                      | LOC109113860 |  | GeneCard |          |
| 252<br>9 | FGF1 Promoter D                                                      | LOC109113862 |  | GeneCard |          |
| 253<br>0 | CYP19A1 Promoter I.4                                                 | LOC110386948 |  | GeneCard |          |
| 253<br>1 | CYP19A1 Promoter I.7                                                 | LOC110386949 |  | GeneCard |          |
| 253<br>2 | CYP7A1 5' Regulatory Region                                          | LOC110596866 |  | GeneCard |          |
| 253<br>3 | CYP11B2 Promoter                                                     | LOC110673971 |  | GeneCard |          |
| 253<br>4 | TERT 5' Regulatory Region                                            | LOC110806263 |  | GeneCard |          |
| 253<br>5 | NOS3 5' Regulatory Region                                            | LOC110973015 |  | GeneCard |          |
| 253<br>6 | CSF1R Promoter/Intronic Regulatory Region                            | LOC111188156 |  | GeneCard |          |
| 253<br>7 | NOS1 1f and 1g Alternate Promoter Region                             | LOC111258525 |  | GeneCard |          |
| 253<br>8 | NOS2 5' Regulatory Region                                            | LOC111365141 |  | GeneCard |          |
| 253<br>9 | Sharpr-MPRA Regulatory Region 9539                                   | LOC113939944 |  | GeneCard |          |
| 254<br>0 | PPARG EExon Liver Enhancer                                           | LOC114803475 |  | GeneCard |          |
| 254<br>1 | CTSL Promoter Region                                                 | LOC117600004 |  | GeneCard |          |
| 254<br>2 | Small Nucleolar RNA U13                                              | LOC124903267 |  | GeneCard |          |
| 254<br>3 | Synaptotagmin Binding Cytoplasmic RNA Interacting Protein Pseudogene | LOC149844    |  | GeneCard |          |
| 254<br>4 | Uncharacterized LOC157273                                            | LOC157273    |  | GeneCard |          |

|          |                                                      |           |      |          |          |
|----------|------------------------------------------------------|-----------|------|----------|----------|
| 254<br>5 | HLA Complex Group 26 (Non-Protein Coding) Pseudogene | LOC353007 |      | GeneCard |          |
| 254<br>6 | EBP Like Pseudogene                                  | LOC729217 |      | GeneCard |          |
| 254<br>7 | Loss of Heterozygosity, 19, Chromosomal Region 1     | LOH19CR1  |      |          | DisGenet |
| 254<br>8 | Lysyl Oxidase                                        | LOX       |      | GeneCard | DisGenet |
| 254<br>9 | Lysyl Oxidase Like 1                                 | LOXL1     |      | GeneCard |          |
| 255<br>0 | LOXL1 Antisense RNA 1                                | LOXL1-AS1 |      | GeneCard |          |
| 255<br>1 | Apolipoprotein Lp(a)                                 | LPA       | OMIM | GeneCard | DisGenet |
| 255<br>2 | Lipoprotein(A) Like 1                                | LPAL1     |      | GeneCard |          |
| 255<br>3 | Lipoprotein(A) Like 2, Pseudogene                    | LPAL2     |      | GeneCard | DisGenet |
| 255<br>4 | Lysophosphatidic Acid Receptor 1                     | LPAR1     |      | GeneCard | DisGenet |
| 255<br>5 | Lysophosphatidic Acid Receptor 2                     | LPAR2     |      | GeneCard | DisGenet |
| 255<br>6 | Lysophosphatidic Acid Receptor 3                     | LPAR3     |      | GeneCard |          |
| 255<br>7 | Lysophosphatidic Acid Receptor 4                     | LPAR4     |      |          | DisGenet |
| 255<br>8 | Lysophosphatidic Acid Receptor 5                     | LPAR5     |      | GeneCard |          |
| 255<br>9 | Lysophosphatidylcholine Acyltransferase 3            | LPCAT3    |      | GeneCard | DisGenet |
| 256<br>0 | Lysophosphatidylglycerol Acyltransferase 1           | LPGAT1    |      | GeneCard |          |
| 256<br>1 | Lipin 1                                              | LPIN1     | OMIM | GeneCard |          |
| 256<br>2 | Lipin 2                                              | LPIN2     |      | GeneCard |          |
| 256<br>3 | Lipin 3                                              | LPIN3     |      | GeneCard |          |
| 256<br>4 | Lipoprotein lipase                                   | LPL       | OMIM | GeneCard | DisGenet |

|          |                                                                            |            |      |          |          |
|----------|----------------------------------------------------------------------------|------------|------|----------|----------|
| 256<br>5 | Lactoperoxidase                                                            | LPO        |      | GeneCard |          |
| 256<br>6 | LIM Domain Containing Preferred Translocation Partner In Lipoma            | LPP        |      | GeneCard | DisGenet |
| 256<br>7 | Leupaxin                                                                   | LPXN       |      | GeneCard |          |
| 256<br>8 | Leucine Rich Alpha-2-Glycoprotein 1                                        | LRG1       |      | GeneCard |          |
| 256<br>9 | Leucine Rich Repeats and Guanylate Kinase Domain Containing                | LRGUK      |      | GeneCard |          |
| 257<br>0 | Leucine Rich Repeats and Immunoglobulin Like Domains 1                     | LRIG1      |      | GeneCard |          |
| 257<br>1 | Leucine Rich Repeats and Immunoglobulin Like Domains 3                     | LRIG3      |      | GeneCard |          |
| 257<br>2 | Low density lipoprotein-related protein-1 (alpha-2-macroglobulin receptor) | LRP1       | OMIM | GeneCard | DisGenet |
| 257<br>3 | LDL Receptor Related Protein 12                                            | LRP12      |      | GeneCard |          |
| 257<br>4 | LDL Receptor Related Protein 1B                                            | LRP1B      |      | GeneCard |          |
| 257<br>5 | LDL Receptor Related Protein 2                                             | LRP2       |      | GeneCard | DisGenet |
| 257<br>6 | LRP2 Binding Protein                                                       | LRP2BP     |      | GeneCard | DisGenet |
| 257<br>7 | LRP2BP Antisense RNA 1                                                     | LRP2BP-AS1 |      | GeneCard |          |
| 257<br>8 | LDL Receptor Related Protein 3                                             | LRP3       |      | GeneCard |          |
| 257<br>9 | LDL Receptor Related Protein 4                                             | LRP4       |      | GeneCard |          |
| 258<br>0 | LDL Receptor Related Protein 5                                             | LRP5       | OMIM | GeneCard | DisGenet |
| 258<br>1 | LDL Receptor Related Protein 6                                             | LRP6       | OMIM | GeneCard | DisGenet |
| 258<br>2 | LDL Receptor Related Protein 8                                             | LRP8       | OMIM | GeneCard | DisGenet |
| 258<br>3 | LDL Receptor Related Protein Associated Protein 1                          | LRPAP1     |      | GeneCard |          |
| 258<br>4 | Leucine Rich Repeat Containing 10                                          | LRRC10     |      | GeneCard |          |

|          |                                                          |        |      |          |          |
|----------|----------------------------------------------------------|--------|------|----------|----------|
| 258<br>5 | Leucine Rich Repeat Containing 18                        | LRRC18 |      | GeneCard |          |
| 258<br>6 | Leucine Rich Repeat Containing 2                         | LRRC2  |      | GeneCard |          |
| 258<br>7 | Leucine Rich Repeat Containing 32                        | LRRC32 |      |          | DisGenet |
| 258<br>8 | Leucine Rich Repeat Containing 41                        | LRRC41 |      | GeneCard |          |
| 258<br>9 | Leucine Rich Repeat Containing 8 VRAC Subunit A          | LRRC8A |      | GeneCard |          |
| 259<br>0 | Leucine Rich Repeats And IQ Motif Containing 3           | LRRIQ3 |      | GeneCard |          |
| 259<br>1 | Leucine Rich Repeat Kinase 2                             | LRRK2  |      | GeneCard |          |
| 259<br>2 | Leucine Rich Repeat Transmembrane Neuronal 1             | LRRTM1 |      | GeneCard |          |
| 259<br>3 | Leucine Rich Repeat Transmembrane Neuronal 4             | LRRTM4 |      | GeneCard |          |
| 259<br>4 | Limbic System Associated Membrane Protein                | LSAMP  |      | GeneCard | DisGenet |
| 259<br>5 | Lanosterol Synthase                                      | LSS    |      | GeneCard |          |
| 259<br>6 | Lymphotoxin alpha (formerly tumor necrosis factor beta)  | LTA    | OMIM | GeneCard | DisGenet |
| 259<br>7 | Leukotriene A4 hydrolase                                 | LTA4H  | OMIM | GeneCard | DisGenet |
| 259<br>8 | Lymphotoxin Beta                                         | LTB    |      | GeneCard | DisGenet |
| 259<br>9 | Leukotriene B4 Receptor                                  | LTB4R  |      | GeneCard | DisGenet |
| 260<br>0 | Leukotriene B4 Receptor 2                                | LTB4R2 |      | GeneCard | DisGenet |
| 260<br>1 | Latent Transforming Growth Factor Beta Binding Protein 1 | LTBP1  | OMIM | GeneCard |          |
| 260<br>2 | Latent Transforming Growth Factor Beta Binding Protein 2 | LTBP2  |      | GeneCard |          |
| 260<br>3 | Latent Transforming Growth Factor Beta Binding Protein 3 | LTBP3  |      | GeneCard |          |
| 260<br>4 | Latent Transforming Growth Factor Beta Binding Protein 4 | LTBP4  |      | GeneCard |          |

|          |                                                         |         |      |          |          |
|----------|---------------------------------------------------------|---------|------|----------|----------|
| 260<br>5 | Lymphotoxin Beta Receptor                               | LTBR    |      | GeneCard |          |
| 260<br>6 | Leukotriene C4 Synthase                                 | LTC4S   |      | GeneCard |          |
| 260<br>7 | Lactotransferrin                                        | LTF     |      | GeneCard |          |
| 260<br>8 | Leukocyte Receptor Tyrosine Kinase                      | LTK     |      | GeneCard |          |
| 260<br>9 | Lumican                                                 | LUM     |      | GeneCard | DisGenet |
| 261<br>0 | Lymphocyte Antigen 75                                   | LY75    |      | GeneCard |          |
| 261<br>1 | Lymphocyte Antigen 86                                   | LY86    |      | GeneCard |          |
| 261<br>2 | Lymphocyte Antigen 9                                    | LY9     |      | GeneCard |          |
| 261<br>3 | Lymphocyte Antigen 96                                   | LY96    |      | GeneCard |          |
| 261<br>4 | LYN Proto-Oncogene, Src Family Tyrosine Kinase          | LYN     |      | GeneCard |          |
| 261<br>5 | Lysophospholipase I                                     | LYPLA1  | OMIM |          | DisGenet |
| 261<br>6 | Lysophospholipase 2                                     | LYPLA2  |      | GeneCard |          |
| 261<br>7 | LysM Domain Containing 4                                | LYSMD4  |      | GeneCard |          |
| 261<br>8 | Lysosomal Trafficking Regulator                         | LYST    |      |          | DisGenet |
| 261<br>9 | Lymphatic Vessel Endothelial Hyaluronan Receptor 1      | LYVE1   |      | GeneCard |          |
| 262<br>0 | Lysozyme                                                | LYZ     |      | GeneCard | DisGenet |
| 262<br>1 | Mannose-6-Phosphate Receptor, Cation Dependent          | M6PR    |      | GeneCard |          |
| 262<br>2 | Microphthalmia or Anophthalmia and Associated Anomalies | MAA     |      |          | DisGenet |
| 262<br>3 | MAB-21 Like 2                                           | MAB21L2 | OMIM | GeneCard |          |
| 262<br>4 | Mono-ADP Ribosylhydrolase 2                             | MACROD2 |      | GeneCard |          |

|          |                                                                      |        |  |          |          |
|----------|----------------------------------------------------------------------|--------|--|----------|----------|
| 262<br>5 | MAF BZIP Transcription Factor                                        | MAF    |  | GeneCard |          |
| 262<br>6 | MAF BZIP Transcription Factor B                                      | MAFB   |  | GeneCard | DisGenet |
| 262<br>7 | MAF BZIP Transcription Factor F                                      | MAFF   |  | GeneCard |          |
| 262<br>8 | MAF Transcriptional Regulator RNA                                    | MAFTRR |  | GeneCard |          |
| 262<br>9 | MAGE family member C3                                                | MAGEC3 |  |          | DisGenet |
| 263<br>0 | MAGE family member E2                                                | MAGEE2 |  |          | DisGenet |
| 263<br>1 | Membrane Associated Guanylate Kinase, WW And PDZ Domain Containing 1 | MAGI1  |  | GeneCard | DisGenet |
| 263<br>2 | Membrane Associated Guanylate Kinase, WW And PDZ Domain Containing 2 | MAGI2  |  | GeneCard | DisGenet |
| 263<br>3 | Mago Homolog B, Exon Junction Complex Subunit                        | MAGOHB |  | GeneCard |          |
| 263<br>4 | MAK16 Homolog                                                        | MAK16  |  |          | DisGenet |
| 263<br>5 | Mal, T Cell Differentiation Protein 2                                | MAL2   |  | GeneCard |          |
| 263<br>6 | Metastasis Associated Lung Adenocarcinoma Transcript 1               | MALAT1 |  | GeneCard | DisGenet |
| 263<br>7 | MAM And LDL Receptor Class A Domain Containing 1                     | MALRD1 |  | GeneCard |          |
| 263<br>8 | MALT1 Paracaspase                                                    | MALT1  |  | GeneCard |          |
| 263<br>9 | Mastermind Like Transcriptional Coactivator 1                        | MAML1  |  |          | DisGenet |
| 264<br>0 | Mannosidase Alpha Class 2A Member 1                                  | MAN2A1 |  | GeneCard |          |
| 264<br>1 | Mannosidase Alpha Class 2B Member 1                                  | MAN2B1 |  | GeneCard |          |
| 264<br>2 | Mesencephalic Astrocyte Derived Neurotrophic Factor                  | MANF   |  | GeneCard |          |
| 264<br>3 | Monoamine Oxidase A                                                  | MAOA   |  | GeneCard | DisGenet |
| 264<br>4 | Monoamine Oxidase B                                                  | MAOB   |  | GeneCard |          |

|          |                                                         |          |  |          |          |
|----------|---------------------------------------------------------|----------|--|----------|----------|
| 264<br>5 | Microtubule Associated Protein 1 Light Chain 3 Alpha    | MAP1LC3A |  | GeneCard |          |
| 264<br>6 | Microtubule Associated Protein 1 Light Chain 3 Beta     | MAP1LC3B |  | GeneCard |          |
| 264<br>7 | Microtubule Associated Protein 2                        | MAP2     |  | GeneCard |          |
| 264<br>8 | Mitogen-Activated Protein Kinase Kinase 1               | MAP2K1   |  | GeneCard | DisGenet |
| 264<br>9 | Mitogen-Activated Protein Kinase Kinase 3               | MAP2K3   |  | GeneCard |          |
| 265<br>0 | Mitogen-Activated Protein Kinase Kinase 4               | MAP2K4   |  | GeneCard |          |
| 265<br>1 | Mitogen-Activated Protein Kinase Kinase 5               | MAP2K5   |  | GeneCard |          |
| 265<br>2 | Mitogen-Activated Protein Kinase Kinase 6               | MAP2K6   |  | GeneCard |          |
| 265<br>3 | Mitogen-Activated Protein Kinase Kinase 7               | MAP2K7   |  | GeneCard | DisGenet |
| 265<br>4 | Mitogen-Activated Protein Kinase Kinase Kinase 1        | MAP3K1   |  | GeneCard |          |
| 265<br>5 | Mitogen-Activated Protein Kinase Kinase Kinase 10       | MAP3K10  |  |          | DisGenet |
| 265<br>6 | Mitogen-Activated Protein Kinase Kinase Kinase 14       | MAP3K14  |  | GeneCard |          |
| 265<br>7 | Mitogen-Activated Protein Kinase Kinase Kinase 2        | MAP3K2   |  | GeneCard |          |
| 265<br>8 | Mitogen-Activated Protein Kinase Kinase Kinase 21       | MAP3K21  |  | GeneCard |          |
| 265<br>9 | Mitogen-Activated Protein Kinase Kinase Kinase 3        | MAP3K3   |  | GeneCard |          |
| 266<br>0 | Mitogen-Activated Protein Kinase Kinase Kinase 5        | MAP3K5   |  | GeneCard | DisGenet |
| 266<br>1 | Mitogen-Activated Protein Kinase Kinase Kinase 7        | MAP3K7   |  | GeneCard | DisGenet |
| 266<br>2 | Mitogen-Activated Protein Kinase Kinase Kinase Kinase 4 | MAP4K4   |  | GeneCard | DisGenet |
| 266<br>3 | Mitogen-Activated Protein Kinase 1                      | MAPK1    |  | GeneCard | DisGenet |
| 266<br>4 | Mitogen-Activated Protein Kinase 10                     | MAPK10   |  | GeneCard |          |

|          |                                                       |          |      |          |          |
|----------|-------------------------------------------------------|----------|------|----------|----------|
| 266<br>5 | Mitogen-Activated Protein Kinase 12                   | MAPK12   |      | GeneCard |          |
| 266<br>6 | Mitogen-Activated Protein Kinase 13                   | MAPK13   |      | GeneCard |          |
| 266<br>7 | Mitogen-Activated Protein Kinase 14                   | MAPK14   |      | GeneCard | DisGenet |
| 266<br>8 | Mitogen-Activated Protein Kinase 3                    | MAPK3    |      | GeneCard | DisGenet |
| 266<br>9 | Mitogen-Activated Protein Kinase 7                    | MAPK7    |      | GeneCard | DisGenet |
| 267<br>0 | Mitogen-Activated Protein Kinase 8                    | MAPK8    |      | GeneCard | DisGenet |
| 267<br>1 | Mitogen-activated protein kinase 9                    | MAPK9    | OMIM | GeneCard | DisGenet |
| 267<br>2 | MAPK Activated Protein Kinase 2                       | MAPKAPK2 |      | GeneCard |          |
| 267<br>3 | Microtubule Associated Protein Tau                    | MAPT     |      | GeneCard |          |
| 267<br>4 | Membrane Associated Ring-CH-type Finger 10            | MARCHF10 |      |          | DisGenet |
| 267<br>5 | Myristoylated Alanine Rich Protein Kinase C Substrate | MARCKS   |      | GeneCard |          |
| 267<br>6 | MARCKS Like 1                                         | MARCKSL1 |      | GeneCard |          |
| 267<br>7 | Macrophage Receptor With Collagenous Structure        | MARCO    |      | GeneCard |          |
| 267<br>8 | Microtubule Affinity Regulating Kinase 1              | MARK1    |      | GeneCard |          |
| 267<br>9 | Microtubule Affinity Regulating Kinase 2              | MARK2    |      |          | DisGenet |
| 268<br>0 | Microtubule Affinity Regulating Kinase 4              | MARK4    |      | GeneCard |          |
| 268<br>1 | Methionyl-TRNA Synthetase 1                           | MARS1    |      | GeneCard |          |
| 268<br>2 | MAS1 roto-oncogene, G protein-coupled receptor        | MAS1     |      |          | DisGenet |
| 268<br>3 | MALAT1-associated small cytoplasmic RNA               | MASCRNA  |      |          | DisGenet |
| 268<br>4 | MBL Associated Serine Protease 1                      | MASP1    |      | GeneCard |          |



|          |                                                                |        |      |          |          |
|----------|----------------------------------------------------------------|--------|------|----------|----------|
| 268<br>5 | MBL Associated Serine Protease 2                               | MASP2  |      | GeneCard |          |
| 268<br>6 | Microtubule Associated Serine/Threonine Kinase Family Member 4 | MAST4  |      | GeneCard |          |
| 268<br>7 | Methionine Adenosyltransferase 2A                              | MAT2A  |      | GeneCard |          |
| 268<br>8 | Methionine Adenosyltransferase 2B                              | MAT2B  |      | GeneCard |          |
| 268<br>9 | Mitochondrial Antiviral Signaling Protein                      | MAVS   |      | GeneCard |          |
| 269<br>0 | MYC Associated Zinc Finger Protein                             | MAZ    |      | GeneCard | DisGenet |
| 269<br>1 | Myoglobin                                                      | MB     |      | GeneCard |          |
| 269<br>2 | Methyl-CpG Binding Domain Protein 2                            | MBD2   |      | GeneCard |          |
| 269<br>3 | Methyl-CpG Binding Domain Protein 3                            | MBD3   |      | GeneCard |          |
| 269<br>4 | Mannose Binding Lectin 1, Pseudogene                           | MBL1P  |      | GeneCard |          |
| 269<br>5 | Mannose Binding Lectin 2                                       | MBL2   | OMIM | GeneCard | DisGenet |
| 269<br>6 | Mannose-Binding Lectin Family Member 3, Pseudogene             | MBL3P  |      |          | DisGenet |
| 269<br>7 | Muscleblind Like Splicing Regulator 1                          | MBNL1  |      | GeneCard |          |
| 269<br>8 | Membrane Bound O-Acyltransferase Domain Containing 1           | MBOAT1 |      | GeneCard |          |
| 269<br>9 | Membrane Bound Transcription Factor Peptidase, Site 1          | MBTPS1 |      | GeneCard | DisGenet |
| 270<br>0 | Membrane Bound Transcription Factor Peptidase, Site 2          | MBTPS2 |      | GeneCard |          |
| 270<br>1 | Melanocortin 1 Receptor                                        | MC1R   |      |          | DisGenet |
| 270<br>2 | Melanocortin 4 Receptor                                        | MC4R   |      | GeneCard | DisGenet |
| 270<br>3 | Melanoma Cell Adhesion Molecule                                | MCAM   |      | GeneCard | DisGenet |
| 270<br>4 | Malonyl-CoA-Acyl Carrier Protein Transacylase                  | MCAT   |      | GeneCard |          |

|          |                                                                     |       |  |          |          |
|----------|---------------------------------------------------------------------|-------|--|----------|----------|
| 270<br>5 | MCF.2 Cell Line Derived Transforming Sequence Like                  | MCF2L |  | GeneCard | DisGenet |
| 270<br>6 | Myocardial Infarction, Susceptibility To, 2                         | MCI2  |  | GeneCard |          |
| 270<br>7 | MCL1 Apoptosis Regulator, BCL2 Family Member                        | MCL1  |  | GeneCard | DisGenet |
| 270<br>8 | Minichromosome Maintenance Complex Component 3                      | MCM3  |  |          | DisGenet |
| 270<br>9 | Minichromosome Maintenance 8 Homologous Recombination Repair Factor | MCM8  |  | GeneCard |          |
| 271<br>0 | Minichromosome Maintenance 9 Homologous Recombination Repair Factor | MCM9  |  | GeneCard |          |
| 271<br>1 | Microcephalin 1                                                     | MCPH1 |  | GeneCard |          |
| 271<br>2 | Multiple C2 And Transmembrane Domain Containing 2                   | MCTP2 |  | GeneCard |          |
| 271<br>3 | Midkine                                                             | MDK   |  | GeneCard | DisGenet |
| 271<br>4 | MDM2 Proto-Oncogene                                                 | MDM2  |  | GeneCard | DisGenet |
| 271<br>5 | MDS1 And EVI1 Complex Locus                                         | MECOM |  | GeneCard |          |
| 271<br>6 | Methyl-CpG Binding Protein 2                                        | MECP2 |  | GeneCard | DisGenet |
| 271<br>7 | Mediator Complex Subunit 1                                          | MED1  |  | GeneCard | DisGenet |
| 271<br>8 | Mediator Complex Subunit 17                                         | MED17 |  | GeneCard |          |
| 271<br>9 | Mediator Complex Subunit 28                                         | MED28 |  | GeneCard |          |
| 272<br>0 | Mediator Complex Subunit 30                                         | MED30 |  | GeneCard |          |
| 272<br>1 | Mediator Complex Subunit 6                                          | MED6  |  | GeneCard |          |
| 272<br>2 | Myocyte Enhancer Factor 2A                                          | MEF2A |  | GeneCard | DisGenet |
| 272<br>3 | Myocyte Enhancer Factor 2C                                          | MEF2C |  | GeneCard | DisGenet |
| 272<br>4 | MEFV Innate Immunity Regulator, Pyrin                               | MEFV  |  | GeneCard | DisGenet |

|          |                                                                               |         |  |          |          |
|----------|-------------------------------------------------------------------------------|---------|--|----------|----------|
| 272<br>5 | Maternally Expressed 3                                                        | MEG3    |  | GeneCard | DisGenet |
| 272<br>6 | Maternally Expressed 8, Small Nucleolar RNA Host Gene                         | MEG8    |  | GeneCard |          |
| 272<br>7 | Multiple EGF Like Domains 10                                                  | MEGF10  |  | GeneCard |          |
| 272<br>8 | Meiosis Specific With OB-Fold                                                 | MEIOB   |  | GeneCard |          |
| 272<br>9 | Mesenchyme Homeobox 2                                                         | MEOX2   |  | GeneCard |          |
| 273<br>0 | Meprin A Subunit Beta                                                         | MEP1B   |  | GeneCard |          |
| 273<br>1 | MER Proto-Oncogene, Tyrosine Kinase                                           | MERTK   |  | GeneCard | DisGenet |
| 273<br>2 | Mesoderm Development LRP Chaperone                                            | MESD    |  | GeneCard |          |
| 273<br>3 | MET Proto-Oncogene, Receptor Tyrosine Kinase                                  | MET     |  | GeneCard |          |
| 273<br>4 | Meteorin, Glial Cell Differentiation Regulator                                | METRNL  |  |          | DisGenet |
| 273<br>5 | Meteorin Like, Glial Cell Differentiation Regulator                           | METRNL  |  | GeneCard |          |
| 273<br>6 | Methyltransferase 14, N6-Adenosine-Methyltransferase Subunit                  | METTL14 |  | GeneCard |          |
| 273<br>7 | Methyltransferase 3, N6-Adenosine-Methyltransferase Complex Catalytic Subunit | METTL3  |  | GeneCard |          |
| 273<br>8 | Methyltransferase Like 9                                                      | METTL9  |  | GeneCard |          |
| 273<br>9 | Microfibril Associated Protein 1                                              | MFAP1   |  |          | DisGenet |
| 274<br>0 | Microfibril Associated Protein 2                                              | MFAP2   |  | GeneCard |          |
| 274<br>1 | Microfibril Associated Protein 4                                              | MFAP4   |  | GeneCard |          |
| 274<br>2 | Microfibril Associated Protein 5                                              | MFAP5   |  | GeneCard |          |
| 274<br>3 | Milk Fat Globule EGF And Factor V/VIII Domain Containing                      | MFGE8   |  | GeneCard | DisGenet |
| 274<br>4 | Mitofusin 1                                                                   | MFN1    |  | GeneCard |          |

|          |                                                                         |              |      |          |          |
|----------|-------------------------------------------------------------------------|--------------|------|----------|----------|
| 274<br>5 | Mitofusin 2                                                             | MFN2         |      | GeneCard | DisGenet |
| 274<br>6 | Membrane Frizzled-Related Protein                                       | MFRP         |      |          | DisGenet |
| 274<br>7 | Major Facilitator Superfamily Domain Containing 11                      | MFSD11       |      | GeneCard |          |
| 274<br>8 | Major Facilitator Superfamily Domain Containing 8                       | MFSD8        |      | GeneCard |          |
| 274<br>9 | Alpha-1,6-Mannosylglycoprotein 6-Beta-N-Acetylglucosaminyltransferase B | MGAT5B       |      | GeneCard |          |
| 275<br>0 | Monoglyceride Lipase                                                    | MGLL         |      | GeneCard | DisGenet |
| 275<br>1 | O-6-Methylguanine-DNA Methyltransferase                                 | MGMT         |      | GeneCard |          |
| 275<br>2 | Matrix Gla protein                                                      | MGP          | OMIM | GeneCard | DisGenet |
| 275<br>3 | Myosin Heavy Chain Associated RNA Transcript                            | MHRT         |      | GeneCard |          |
| 275<br>4 | MIA SH3 Domain ER Export Factor 3                                       | MIA3         |      | GeneCard | DisGenet |
| 275<br>5 | Myocardial Infarction Associated Transcript                             | MIAT         |      | GeneCard | DisGenet |
| 275<br>6 | MHC Class I Polypeptide-Related Sequence A                              | MICA         |      | GeneCard | DisGenet |
| 275<br>7 | MICA Antisense RNA 1                                                    | MICA-AS1     |      | GeneCard |          |
| 275<br>8 | MHC Class I Polypeptide-Related Sequence B                              | MICB         |      | GeneCard |          |
| 275<br>9 | Mitochondrial Contact Site and Cristae Organizing System Subunit 10     | MICOS10      |      | GeneCard |          |
| 276<br>0 | MICOS10-NBL1 readthrough                                                | MICOS10-NBL1 |      |          | DisGenet |
| 276<br>1 | Mitochondrial Calcium Uptake 1                                          | MICU1        |      |          | DisGenet |
| 276<br>2 | Macrophage Migration Inhibitory Factor                                  | MIF          |      | GeneCard | DisGenet |
| 276<br>3 | MINDY lysine 48 deubiquitinase 4                                        | MINDY4       |      |          | DisGenet |
| 276<br>4 | Mitochondrial Intermediate Peptidase                                    | MIPEP        |      | GeneCard |          |

|          |                    |            |  |          |          |
|----------|--------------------|------------|--|----------|----------|
| 276<br>5 | MicroRNA 100       | MIR100     |  | GeneCard | DisGenet |
| 276<br>6 | MicroRNA 101-1     | MIR101-1   |  | GeneCard |          |
| 276<br>7 | MicroRNA 103a-1    | MIR103A1   |  | GeneCard |          |
| 276<br>8 | MicroRNA 103a-2    | MIR103A2   |  | GeneCard |          |
| 276<br>9 | MicroRNA 106a      | MIR106A    |  | GeneCard |          |
| 277<br>0 | MicroRNA 106b      | MIR106B    |  | GeneCard |          |
| 277<br>1 | MicroRNA 107       | MIR107     |  |          | DisGenet |
| 277<br>2 | MicroRNA 10a       | MIR10A     |  | GeneCard | DisGenet |
| 277<br>3 | MicroRNA 10b       | MIR10B     |  | GeneCard | DisGenet |
| 277<br>4 | MicroRNA 11399     | MIR11399   |  | GeneCard |          |
| 277<br>5 | MicroRNA 11400     | MIR11400   |  | GeneCard |          |
| 277<br>6 | MicroRNA 11401     | MIR11401   |  | GeneCard |          |
| 277<br>7 | MicroRNA 1185-1    | MIR1185-1  |  | GeneCard |          |
| 277<br>8 | MicroRNA 1185-2    | MIR1185-2  |  | GeneCard |          |
| 277<br>9 | MicroRNA 1208      | MIR1208    |  | GeneCard |          |
| 278<br>0 | MicroRNA 122       | MIR122     |  | GeneCard | DisGenet |
| 278<br>1 | MicroRNA 1228      | MIR1228    |  | GeneCard |          |
| 278<br>2 | MicroRNA 124-1     | MIR124-1   |  | GeneCard |          |
| 278<br>3 | MIR124-1 Host Gene | MIR124-1HG |  | GeneCard |          |
| 278<br>4 | MicroRNA 124-2     | MIR124-2   |  | GeneCard |          |

|          |                 |          |      |          |          |
|----------|-----------------|----------|------|----------|----------|
| 278<br>5 | MicroRNA 124-3  | MIR124-3 |      | GeneCard |          |
| 278<br>6 | MicroRNA 1246   | MIR1246  |      | GeneCard |          |
| 278<br>7 | MicroRNA 125a   | MIR125A  |      | GeneCard | DisGenet |
| 278<br>8 | MicroRNA 125b-1 | MIR125B1 | OMIM | GeneCard |          |
| 278<br>9 | MicroRNA 126    | MIR126   |      | GeneCard | DisGenet |
| 279<br>0 | MicroRNA 1264   | MIR1264  |      | GeneCard |          |
| 279<br>1 | MicroRNA 127    | MIR127   |      |          | DisGenet |
| 279<br>2 | MicroRNA 1275   | MIR1275  |      | GeneCard |          |
| 279<br>3 | MicroRNA 1277   | MIR1277  |      | GeneCard |          |
| 279<br>4 | MicroRNA 128-1  | MIR128-1 |      | GeneCard |          |
| 279<br>5 | MicroRNA 1290   | MIR1290  |      | GeneCard |          |
| 279<br>6 | MicroRNA 1306   | MIR1306  |      | GeneCard |          |
| 279<br>7 | MicroRNA 130a   | MIR130A  |      | GeneCard |          |
| 279<br>8 | MicroRNA 130b   | MIR130B  |      | GeneCard |          |
| 279<br>9 | MicroRNA 132    | MIR132   |      | GeneCard |          |
| 280<br>0 | MicroRNA 133a-1 | MIR133A1 |      | GeneCard |          |
| 280<br>1 | MicroRNA 133a-2 | MIR133A2 |      | GeneCard |          |
| 280<br>2 | MicroRNA 133b   | MIR133B  |      | GeneCard | DisGenet |
| 280<br>3 | MicroRNA 134    | MIR134   |      | GeneCard | DisGenet |
| 280<br>4 | MicroRNA 135a-1 | MIR135A1 |      | GeneCard |          |

|          |                 |          |      |          |          |
|----------|-----------------|----------|------|----------|----------|
| 280<br>5 | MicroRNA 135a-2 | MIR135A2 |      | GeneCard |          |
| 280<br>6 | MicroRNA 135b   | MIR135B  |      | GeneCard | DisGenet |
| 280<br>7 | MicroRNA 136    | MIR136   |      |          | DisGenet |
| 280<br>8 | MicroRNA 137    | MIR137   |      | GeneCard |          |
| 280<br>9 | MicroRNA 140    | MIR140   |      | GeneCard | DisGenet |
| 281<br>0 | MicroRNA 141    | MIR141   |      | GeneCard |          |
| 281<br>1 | MicroRNA 142    | MIR142   |      | GeneCard | DisGenet |
| 281<br>2 | MicroRNA 143    | MIR143   | OMIM | GeneCard | DisGenet |
| 281<br>3 | MicroRNA 144    | MIR144   |      | GeneCard | DisGenet |
| 281<br>4 | MicroRNA 145    | MIR145   | OMIM | GeneCard | DisGenet |
| 281<br>5 | MicroRNA 146a   | MIR146A  |      | GeneCard | DisGenet |
| 281<br>6 | MicroRNA 146b   | MIR146B  |      | GeneCard | DisGenet |
| 281<br>7 | MicroRNA 147a   | MIR147A  |      | GeneCard |          |
| 281<br>8 | MicroRNA 148a   | MIR148A  |      | GeneCard | DisGenet |
| 281<br>9 | MicroRNA 148b   | MIR148B  |      | GeneCard | DisGenet |
| 282<br>0 | MicroRNA 149    | MIR149   |      | GeneCard | DisGenet |
| 282<br>1 | MicroRNA 150    | MIR150   |      | GeneCard | DisGenet |
| 282<br>2 | MicroRNA 151a   | MIR151A  |      | GeneCard |          |
| 282<br>3 | MicroRNA 152    | MIR152   |      | GeneCard | DisGenet |
| 282<br>4 | MicroRNA 155    | MIR155   |      | GeneCard | DisGenet |

|          |                                |          |  |          |          |
|----------|--------------------------------|----------|--|----------|----------|
| 282<br>5 | MicroRNA 15a                   | MIR15A   |  | GeneCard | DisGenet |
| 282<br>6 | MicroRNA 15b                   | MIR15B   |  | GeneCard |          |
| 282<br>7 | MicroRNA 16-1                  | MIR16-1  |  | GeneCard |          |
| 282<br>8 | MicroRNA 17                    | MIR17    |  | GeneCard | DisGenet |
| 282<br>9 | MiR-17-92a-1 cluster host gene | MIR17HG  |  |          | DisGenet |
| 283<br>0 | MicroRNA 181a-1                | MIR181A1 |  | GeneCard |          |
| 283<br>1 | MicroRNA 181a-2                | MIR181A2 |  |          | DisGenet |
| 283<br>2 | MicroRNA 181b-1                | MIR181B1 |  | GeneCard |          |
| 283<br>3 | MicroRNA 181b-2                | MIR181B2 |  | GeneCard |          |
| 283<br>4 | MicroRNA 181c                  | MIR181C  |  | GeneCard |          |
| 283<br>5 | MicroRNA 182                   | MIR182   |  | GeneCard | DisGenet |
| 283<br>6 | MicroRNA 183                   | MIR183   |  | GeneCard | DisGenet |
| 283<br>7 | MicroRNA 184                   | MIR184   |  | GeneCard |          |
| 283<br>8 | MicroRNA 185                   | MIR185   |  | GeneCard | DisGenet |
| 283<br>9 | MicroRNA 186                   | MIR186   |  | GeneCard |          |
| 284<br>0 | MicroRNA 188                   | MIR188   |  |          | DisGenet |
| 284<br>1 | MicroRNA 18a                   | MIR18A   |  | GeneCard | DisGenet |
| 284<br>2 | MicroRNA 18b                   | MIR18B   |  |          | DisGenet |
| 284<br>3 | MicroRNA 191                   | MIR191   |  | GeneCard |          |
| 284<br>4 | MicroRNA 192                   | MIR192   |  | GeneCard | DisGenet |



|          |                 |          |  |          |          |
|----------|-----------------|----------|--|----------|----------|
| 284<br>5 | MicroRNA 193b   | MIR193B  |  | GeneCard |          |
| 284<br>6 | MicroRNA 194-1  | MIR194-1 |  | GeneCard |          |
| 284<br>7 | MicroRNA 195    | MIR195   |  | GeneCard |          |
| 284<br>8 | MicroRNA 196a-2 | MIR196A2 |  | GeneCard |          |
| 284<br>9 | MicroRNA 197    | MIR197   |  | GeneCard |          |
| 285<br>0 | MicroRNA 198    | MIR198   |  | GeneCard |          |
| 285<br>1 | MicroRNA 199a-1 | MIR199A1 |  | GeneCard | DisGenet |
| 285<br>2 | MicroRNA 199a-2 | MIR199A2 |  | GeneCard | DisGenet |
| 285<br>3 | MicroRNA 19a    | MIR19A   |  | GeneCard | DisGenet |
| 285<br>4 | MicroRNA 19b-1  | MIR19B1  |  | GeneCard | DisGenet |
| 285<br>5 | MicroRNA 19b-2  | MIR19B2  |  | GeneCard |          |
| 285<br>6 | MicroRNA 200a   | MIR200A  |  | GeneCard |          |
| 285<br>7 | MicroRNA 200b   | MIR200B  |  | GeneCard |          |
| 285<br>8 | MicroRNA 200c   | MIR200C  |  | GeneCard |          |
| 285<br>9 | MicroRNA 204    | MIR204   |  | GeneCard |          |
| 286<br>0 | MicroRNA 205    | MIR205   |  | GeneCard | DisGenet |
| 286<br>1 | MicroRNA 206    | MIR206   |  | GeneCard | DisGenet |
| 286<br>2 | MicroRNA 208a   | MIR208A  |  | GeneCard |          |
| 286<br>3 | MicroRNA 208b   | MIR208B  |  | GeneCard |          |
| 286<br>4 | MicroRNA 20a    | MIR20A   |  | GeneCard | DisGenet |

|          |                              |          |      |          |          |
|----------|------------------------------|----------|------|----------|----------|
| 286<br>5 | MicroRNA 21                  | MIR21    |      | GeneCard | DisGenet |
| 286<br>6 | MicroRNA 210                 | MIR210   |      | GeneCard | DisGenet |
| 286<br>7 | MicroRNA 211                 | MIR211   |      | GeneCard |          |
| 286<br>8 | MicroRNA 2113                | MIR2113  |      | GeneCard |          |
| 286<br>9 | MicroRNA 212                 | MIR212   |      | GeneCard | DisGenet |
| 287<br>0 | MicroRNA 214                 | MIR214   |      | GeneCard | DisGenet |
| 287<br>1 | MicroRNA 215                 | MIR215   |      | GeneCard |          |
| 287<br>2 | MicroRNA 216a                | MIR216A  |      | GeneCard | DisGenet |
| 287<br>3 | MicroRNA 217                 | MIR217   | OMIM | GeneCard | DisGenet |
| 287<br>4 | MicroRNA 22                  | MIR22    |      | GeneCard | DisGenet |
| 287<br>5 | MicroRNA 221                 | MIR221   |      | GeneCard | DisGenet |
| 287<br>6 | MicroRNA 222                 | MIR222   |      | GeneCard | DisGenet |
| 287<br>7 | MiR222/221 Cluster Host Gene | MIR222HG |      | GeneCard | DisGenet |
| 287<br>8 | MicroRNA 223                 | MIR223   |      | GeneCard | DisGenet |
| 287<br>9 | MicroRNA 224                 | MIR224   |      | GeneCard |          |
| 288<br>0 | MicroRNA 23a                 | MIR23A   |      | GeneCard | DisGenet |
| 288<br>1 | MicroRNA 23b                 | MIR23B   |      | GeneCard | DisGenet |
| 288<br>2 | MicroRNA 24-1                | MIR24-1  |      | GeneCard | DisGenet |
| 288<br>3 | MicroRNA 24-2                | MIR24-2  |      | GeneCard |          |
| 288<br>4 | MicroRNA 25                  | MIR25    |      | GeneCard | DisGenet |

|          |                |         |  |          |          |
|----------|----------------|---------|--|----------|----------|
| 288<br>5 | MicroRNA 26a-1 | MIR26A1 |  | GeneCard |          |
| 288<br>6 | MicroRNA 26a-2 | MIR26A2 |  | GeneCard |          |
| 288<br>7 | MicroRNA 27a   | MIR27A  |  | GeneCard | DisGenet |
| 288<br>8 | MicroRNA 27b   | MIR27B  |  | GeneCard | DisGenet |
| 288<br>9 | MicroRNA 28    | MIR28   |  | GeneCard | DisGenet |
| 289<br>0 | MicroRNA 2909  | MIR2909 |  | GeneCard |          |
| 289<br>1 | MicroRNA 296   | MIR296  |  | GeneCard | DisGenet |
| 289<br>2 | MicroRNA 29a   | MIR29A  |  | GeneCard | DisGenet |
| 289<br>3 | MicroRNA 29b-1 | MIR29B1 |  | GeneCard | DisGenet |
| 289<br>4 | microRNA 29b-2 | MIR29B2 |  |          | DisGenet |
| 289<br>5 | microRNA 29c   | MIR29C  |  |          | DisGenet |
| 289<br>6 | MicroRNA 302a  | MIR302A |  | GeneCard | DisGenet |
| 289<br>7 | MicroRNA 30a   | MIR30A  |  | GeneCard |          |
| 289<br>8 | MicroRNA 30b   | MIR30B  |  | GeneCard |          |
| 289<br>9 | MicroRNA 30c-1 | MIR30C1 |  | GeneCard | DisGenet |
| 290<br>0 | MicroRNA 30c-2 | MIR30C2 |  | GeneCard | DisGenet |
| 290<br>1 | MicroRNA 30d   | MIR30D  |  | GeneCard |          |
| 290<br>2 | MicroRNA 30e   | MIR30E  |  | GeneCard | DisGenet |
| 290<br>3 | MicroRNA 31    | MIR31   |  | GeneCard |          |
| 290<br>4 | MicroRNA 3188  | MIR3188 |  | GeneCard | DisGenet |

|          |                 |          |  |          |          |
|----------|-----------------|----------|--|----------|----------|
| 290<br>5 | MicroRNA 320a   | MIR320A  |  | GeneCard |          |
| 290<br>6 | MicroRNA 320b-1 | MIR320B1 |  | GeneCard |          |
| 290<br>7 | MicroRNA 323a   | MIR323A  |  | GeneCard |          |
| 290<br>8 | MicroRNA 324    | MIR324   |  | GeneCard |          |
| 290<br>9 | MicroRNA 325    | MIR325   |  | GeneCard |          |
| 291<br>0 | MicroRNA 326    | MIR326   |  | GeneCard |          |
| 291<br>1 | MicroRNA 328    | MIR328   |  | GeneCard | DisGenet |
| 291<br>2 | MicroRNA 330    | MIR330   |  | GeneCard | DisGenet |
| 291<br>3 | MicroRNA 331    | MIR331   |  | GeneCard |          |
| 291<br>4 | MicroRNA 335    | MIR335   |  | GeneCard | DisGenet |
| 291<br>5 | MicroRNA 338    | MIR338   |  |          | DisGenet |
| 291<br>6 | MicroRNA 339    | MIR339   |  | GeneCard |          |
| 291<br>7 | MicroRNA 33a    | MIR33A   |  | GeneCard | DisGenet |
| 291<br>8 | MicroRNA 33b    | MIR33B   |  | GeneCard | DisGenet |
| 291<br>9 | MicroRNA 340    | MIR340   |  | GeneCard |          |
| 292<br>0 | microRNA 342    | MIR342   |  |          | DisGenet |
| 292<br>1 | MicroRNA 345    | MIR345   |  | GeneCard |          |
| 292<br>2 | MicroRNA 346    | MIR346   |  | GeneCard |          |
| 292<br>3 | MicroRNA 34a    | MIR34A   |  | GeneCard | DisGenet |
| 292<br>4 | MicroRNA 34b    | MIR34B   |  | GeneCard |          |

|          |                 |           |  |          |          |
|----------|-----------------|-----------|--|----------|----------|
| 292<br>5 | MicroRNA 34c    | MIR34C    |  | GeneCard |          |
| 292<br>6 | MicroRNA 361    | MIR361    |  | GeneCard |          |
| 292<br>7 | MicroRNA 362    | MIR362    |  | GeneCard | DisGenet |
| 292<br>8 | MicroRNA 365a   | MIR365A   |  | GeneCard |          |
| 292<br>9 | MicroRNA 367    | MIR367    |  | GeneCard |          |
| 293<br>0 | MicroRNA 3688-1 | MIR3688-1 |  | GeneCard |          |
| 293<br>1 | MicroRNA 370    | MIR370    |  | GeneCard | DisGenet |
| 293<br>2 | MicroRNA 375    | MIR375    |  |          | DisGenet |
| 293<br>3 | MicroRNA 377    | MIR377    |  | GeneCard | DisGenet |
| 293<br>4 | MicroRNA 378a   | MIR378A   |  | GeneCard | DisGenet |
| 293<br>5 | MicroRNA 378c   | MIR378C   |  | GeneCard |          |
| 293<br>6 | MicroRNA 381    | MIR381    |  | GeneCard |          |
| 293<br>7 | MicroRNA 382    | MIR382    |  | GeneCard |          |
| 293<br>8 | MicroRNA 384    | MIR384    |  | GeneCard |          |
| 293<br>9 | MicroRNA 410    | MIR410    |  |          | DisGenet |
| 294<br>0 | MicroRNA 421    | MIR421    |  | GeneCard |          |
| 294<br>1 | MicroRNA 423    | MIR423    |  | GeneCard |          |
| 294<br>2 | MicroRNA 424    | MIR424    |  | GeneCard |          |
| 294<br>3 | MicroRNA 425    | MIR425    |  | GeneCard |          |
| 294<br>4 | MicroRNA 431    | MIR431    |  |          | DisGenet |

|          |                   |           |  |          |          |
|----------|-------------------|-----------|--|----------|----------|
| 294<br>5 | MicroRNA 433      | MIR433    |  | GeneCard |          |
| 294<br>6 | MicroRNA 4463     | MIR4463   |  | GeneCard | DisGenet |
| 294<br>7 | MicroRNA 448      | MIR448    |  | GeneCard |          |
| 294<br>8 | MicroRNA 449a     | MIR449A   |  |          | DisGenet |
| 294<br>9 | MicroRNA 451a     | MIR451A   |  | GeneCard | DisGenet |
| 295<br>0 | MicroRNA 455      | MIR455    |  | GeneCard | DisGenet |
| 295<br>1 | MicroRNA 4632     | MIR4632   |  | GeneCard |          |
| 295<br>2 | MIR4713 Host Gene | MIR4713HG |  | GeneCard |          |
| 295<br>3 | MicroRNA 4723     | MIR4723   |  | GeneCard |          |
| 295<br>4 | MicroRNA 4731     | MIR4731   |  | GeneCard |          |
| 295<br>5 | MicroRNA 483      | MIR483    |  | GeneCard |          |
| 295<br>6 | MicroRNA 484      | MIR484    |  | GeneCard |          |
| 295<br>7 | MicroRNA 486-1    | MIR486-1  |  | GeneCard | DisGenet |
| 295<br>8 | MicroRNA 488      | MIR488    |  | GeneCard |          |
| 295<br>9 | MicroRNA 489      | MIR489    |  | GeneCard | DisGenet |
| 296<br>0 | MicroRNA 490      | MIR490    |  | GeneCard | DisGenet |
| 296<br>1 | MicroRNA 491      | MIR491    |  | GeneCard |          |
| 296<br>2 | MicroRNA 492      | MIR492    |  | GeneCard | DisGenet |
| 296<br>3 | MicroRNA 494      | MIR494    |  | GeneCard | DisGenet |
| 296<br>4 | MicroRNA 495      | MIR495    |  | GeneCard |          |

|          |                |          |  |          |          |
|----------|----------------|----------|--|----------|----------|
| 296<br>5 | MicroRNA 496   | MIR496   |  | GeneCard |          |
| 296<br>6 | MicroRNA 497   | MIR497   |  | GeneCard | DisGenet |
| 296<br>7 | MicroRNA 499a  | MIR499A  |  | GeneCard | DisGenet |
| 296<br>8 | MicroRNA 500a  | MIR500A  |  | GeneCard |          |
| 296<br>9 | MicroRNA 502   | MIR502   |  | GeneCard |          |
| 297<br>0 | MicroRNA 503   | MIR503   |  | GeneCard |          |
| 297<br>1 | MicroRNA 505   | MIR505   |  | GeneCard | DisGenet |
| 297<br>2 | MicroRNA 506   | MIR506   |  | GeneCard |          |
| 297<br>3 | MicroRNA 508   | MIR508   |  | GeneCard |          |
| 297<br>4 | MicroRNA 512-1 | MIR512-1 |  | GeneCard |          |
| 297<br>5 | MicroRNA 518b  | MIR518B  |  | GeneCard |          |
| 297<br>6 | MicroRNA 5197  | MIR5197  |  | GeneCard |          |
| 297<br>7 | MicroRNA 519d  | MIR519D  |  |          | DisGenet |
| 297<br>8 | MicroRNA 520b  | MIR520B  |  | GeneCard |          |
| 297<br>9 | MicroRNA 520c  | MIR520C  |  | GeneCard |          |
| 298<br>0 | MicroRNA 532   | MIR532   |  | GeneCard |          |
| 298<br>1 | MicroRNA 541   | MIR541   |  | GeneCard |          |
| 298<br>2 | MicroRNA 544a  | MIR544A  |  | GeneCard |          |
| 298<br>3 | MicroRNA 544b  | MIR544B  |  | GeneCard |          |
| 298<br>4 | MicroRNA 548j  | MIR548J  |  | GeneCard |          |

|          |               |         |  |          |          |
|----------|---------------|---------|--|----------|----------|
| 298<br>5 | MicroRNA 548p | MIR548P |  | GeneCard |          |
| 298<br>6 | MicroRNA 556  | MIR556  |  | GeneCard |          |
| 298<br>7 | MicroRNA 557  | MIR557  |  | GeneCard |          |
| 298<br>8 | MicroRNA 570  | MIR570  |  | GeneCard |          |
| 298<br>9 | MicroRNA 575  | MIR575  |  | GeneCard | DisGenet |
| 299<br>0 | MicroRNA 583  | MIR583  |  | GeneCard |          |
| 299<br>1 | MicroRNA 584  | MIR584  |  | GeneCard |          |
| 299<br>2 | MicroRNA 590  | MIR590  |  | GeneCard | DisGenet |
| 299<br>3 | MicroRNA 596  | MIR596  |  | GeneCard |          |
| 299<br>4 | MicroRNA 599  | MIR599  |  | GeneCard |          |
| 299<br>5 | MicroRNA 600  | MIR600  |  | GeneCard |          |
| 299<br>6 | MicroRNA 601  | MIR601  |  | GeneCard |          |
| 299<br>7 | MicroRNA 602  | MIR602  |  | GeneCard |          |
| 299<br>8 | MicroRNA 608  | MIR608  |  | GeneCard |          |
| 299<br>9 | MicroRNA 6089 | MIR6089 |  | GeneCard |          |
| 300<br>0 | MicroRNA 611  | MIR611  |  | GeneCard |          |
| 300<br>1 | MicroRNA 612  | MIR612  |  | GeneCard | DisGenet |
| 300<br>2 | MicroRNA 613  | MIR613  |  | GeneCard |          |
| 300<br>3 | MicroRNA 6132 | MIR6132 |  | GeneCard |          |
| 300<br>4 | MicroRNA 615  | MIR615  |  | GeneCard |          |



|          |               |         |  |          |          |
|----------|---------------|---------|--|----------|----------|
| 300<br>5 | MicroRNA 616  | MIR616  |  | GeneCard |          |
| 300<br>6 | MicroRNA 622  | MIR622  |  | GeneCard |          |
| 300<br>7 | MicroRNA 624  | MIR624  |  | GeneCard |          |
| 300<br>8 | MicroRNA 629  | MIR629  |  | GeneCard |          |
| 300<br>9 | MicroRNA 630  | MIR630  |  | GeneCard |          |
| 301<br>0 | MicroRNA 636  | MIR636  |  | GeneCard |          |
| 301<br>1 | MicroRNA 637  | MIR637  |  | GeneCard |          |
| 301<br>2 | MicroRNA 638  | MIR638  |  | GeneCard |          |
| 301<br>3 | MicroRNA 642a | MIR642A |  | GeneCard |          |
| 301<br>4 | MicroRNA 647  | MIR647  |  | GeneCard | DisGenet |
| 301<br>5 | MicroRNA 652  | MIR652  |  |          | DisGenet |
| 301<br>6 | MicroRNA 654  | MIR654  |  | GeneCard |          |
| 301<br>7 | MicroRNA 657  | MIR657  |  | GeneCard |          |
| 301<br>8 | MicroRNA 658  | MIR658  |  | GeneCard |          |
| 301<br>9 | MicroRNA 659  | MIR659  |  | GeneCard |          |
| 302<br>0 | MicroRNA 662  | MIR662  |  | GeneCard |          |
| 302<br>1 | MicroRNA 663a | MIR663A |  | GeneCard |          |
| 302<br>2 | MicroRNA 664a | MIR664A |  | GeneCard | DisGenet |
| 302<br>3 | MicroRNA 6742 | MIR6742 |  | GeneCard |          |
| 302<br>4 | MicroRNA 6873 | MIR6873 |  | GeneCard |          |

|          |                   |           |  |          |          |
|----------|-------------------|-----------|--|----------|----------|
| 302<br>5 | MicroRNA 6886     | MIR6886   |  | GeneCard |          |
| 302<br>6 | MicroRNA 6891     | MIR6891   |  | GeneCard |          |
| 302<br>7 | MicroRNA 758      | MIR758    |  | GeneCard | DisGenet |
| 302<br>8 | MicroRNA 761      | MIR761    |  | GeneCard |          |
| 302<br>9 | MicroRNA 769      | MIR769    |  | GeneCard |          |
| 303<br>0 | MicroRNA 873      | MIR873    |  | GeneCard |          |
| 303<br>1 | MicroRNA 876      | MIR876    |  |          | DisGenet |
| 303<br>2 | MicroRNA 9-1      | MIR9-1    |  | GeneCard |          |
| 303<br>3 | MicroRNA 9-2      | MIR9-2    |  | GeneCard |          |
| 303<br>4 | MicroRNA 92a-1    | MIR92A1   |  | GeneCard |          |
| 303<br>5 | MicroRNA 92a-2    | MIR92A2   |  | GeneCard |          |
| 303<br>6 | MicroRNA 92b      | MIR92B    |  | GeneCard |          |
| 303<br>7 | MicroRNA 93       | MIR93     |  | GeneCard |          |
| 303<br>8 | MicroRNA 942      | MIR942    |  | GeneCard |          |
| 303<br>9 | MicroRNA 98       | MIR98     |  | GeneCard | DisGenet |
| 304<br>0 | MicroRNA 99a      | MIR99A    |  | GeneCard | DisGenet |
| 304<br>1 | MicroRNA Let-7a-1 | MIRLET7A1 |  | GeneCard |          |
| 304<br>2 | MicroRNA Let-7a-2 | MIRLET7A2 |  | GeneCard |          |
| 304<br>3 | MicroRNA Let-7a-3 | MIRLET7A3 |  | GeneCard |          |
| 304<br>4 | MicroRNA Let-7b   | MIRLET7B  |  | GeneCard | DisGenet |

|          |                                                   |           |      |          |          |
|----------|---------------------------------------------------|-----------|------|----------|----------|
| 304<br>5 | MicroRNA Let-7c                                   | MIRLET7C  |      | GeneCard |          |
| 304<br>6 | MicroRNA Let-7d                                   | MIRLET7D  |      | GeneCard |          |
| 304<br>7 | MicroRNA Let-7e                                   | MIRLET7E  |      | GeneCard |          |
| 304<br>8 | MicroRNA Let-7f-1                                 | MIRLET7F1 |      | GeneCard |          |
| 304<br>9 | MicroRNA Let-7g                                   | MIRLET7G  |      | GeneCard | DisGenet |
| 305<br>0 | Mitochondrial Matrix Import Factor 23             | MIX23     |      | GeneCard |          |
| 305<br>1 | Marker Of Proliferation Ki-67                     | MKI67     |      | GeneCard |          |
| 305<br>2 | MAPK Interacting Serine/Threonine Kinase 1        | MKNK1     |      | GeneCard |          |
| 305<br>3 | Modulator of VRAC Current 1                       | MLC1      |      |          | DisGenet |
| 305<br>4 | MutL Homolog 1                                    | MLH1      |      | GeneCard |          |
| 305<br>5 | MutL Homolog 3                                    | MLH3      |      | GeneCard |          |
| 305<br>6 | Mixed Lineage Kinase Domain Like Pseudokinase     | MLKL      |      | GeneCard | DisGenet |
| 305<br>7 | Motilin                                           | MLN       |      | GeneCard |          |
| 305<br>8 | MTOR Associated Protein, LST8 Homolog             | MLST8     |      | GeneCard |          |
| 305<br>9 | MAX Dimerization Protein MLX                      | MLX       |      | GeneCard |          |
| 306<br>0 | MLX Interacting Protein Like                      | MLXIPL    |      | GeneCard | DisGenet |
| 306<br>1 | Metabolism Of Cobalamin Associated C              | MMACHC    | OMIM | GeneCard |          |
| 306<br>2 | Monocyte to Macrophage Differentiation Associated | MMD       |      |          | DisGenet |
| 306<br>3 | Membrane Metalloendopeptidase                     | MME       |      | GeneCard |          |
| 306<br>4 | Matrix Metallopeptidase 1                         | MMP1      |      | GeneCard | DisGenet |

|          |                                                           |       |      |          |          |
|----------|-----------------------------------------------------------|-------|------|----------|----------|
| 306<br>5 | Matrix Metallopeptidase 10                                | MMP10 |      | GeneCard | DisGenet |
| 306<br>6 | Matrix Metallopeptidase 11                                | MMP11 |      | GeneCard | DisGenet |
| 306<br>7 | Matrix Metallopeptidase 12                                | MMP12 | OMIM | GeneCard | DisGenet |
| 306<br>8 | Matrix Metallopeptidase 13                                | MMP13 |      | GeneCard | DisGenet |
| 306<br>9 | Matrix Metallopeptidase 14                                | MMP14 |      | GeneCard | DisGenet |
| 307<br>0 | Matrix Metallopeptidase 15                                | MMP15 |      | GeneCard |          |
| 307<br>1 | Matrix Metallopeptidase 17                                | MMP17 |      | GeneCard | DisGenet |
| 307<br>2 | Matrix Metallopeptidase 19                                | MMP19 |      | GeneCard |          |
| 307<br>3 | Matrix Metallopeptidase 2                                 | MMP2  |      | GeneCard | DisGenet |
| 307<br>4 | Matrix Metallopeptidase 26                                | MMP26 |      | GeneCard |          |
| 307<br>5 | Matrix Metalloproteinase 3 (stromelysin 1, progelatinase) | MMP3  | OMIM |          | DisGenet |
| 307<br>6 | Matrix Metallopeptidase 7                                 | MMP7  |      | GeneCard | DisGenet |
| 307<br>7 | Matrix Metallopeptidase 8                                 | MMP8  |      | GeneCard | DisGenet |
| 307<br>8 | Matrix Metallopeptidase 9                                 | MMP9  |      | GeneCard | DisGenet |
| 307<br>9 | Multimerin 1                                              | MMRN1 |      | GeneCard | DisGenet |
| 308<br>0 | Malignant Mesothelioma                                    | MMS   |      |          | DisGenet |
| 308<br>1 | Meiotic Nuclear Divisions 1                               | MND1  |      | GeneCard |          |
| 308<br>2 | Myeloid Cell Nuclear Differentiation Antigen              | MNDA  |      | GeneCard | DisGenet |
| 308<br>3 | Meiosis Specific Nuclear Structural 1                     | MNS1  |      | GeneCard |          |
| 308<br>4 | Myelin Associated Oligodendrocyte Basic Protein           | MOBP  |      | GeneCard |          |

|          |                                                            |        |  |          |          |
|----------|------------------------------------------------------------|--------|--|----------|----------|
| 308<br>5 | Molybdenum Cofactor Sulfurase                              | MOCOS  |  | GeneCard | DisGenet |
| 308<br>6 | Molybdenum Cofactor Synthesis 1                            | MOCS1  |  | GeneCard |          |
| 308<br>7 | Molybdenum Cofactor Synthesis 2                            | MOCS2  |  | GeneCard |          |
| 308<br>8 | MOK protein kinase                                         | MOK    |  |          | DisGenet |
| 308<br>9 | MORC Family CW-Type Zinc Finger 1                          | MORC1  |  | GeneCard |          |
| 309<br>0 | Macrophage Expressed 1                                     | MPEG1  |  |          | DisGenet |
| 309<br>1 | Mannose Phosphate Isomerase                                | MPI    |  | GeneCard |          |
| 309<br>2 | MPL Proto-Oncogene, Thrombopoietin Receptor                | MPL    |  | GeneCard |          |
| 309<br>3 | Myeloperoxidase                                            | MPO    |  | GeneCard | DisGenet |
| 309<br>4 | MAGUK P55 Scaffold Protein 1                               | MPP1   |  | GeneCard |          |
| 309<br>5 | MAGUK P55 Scaffold Protein 7                               | MPP7   |  | GeneCard |          |
| 309<br>6 | Myosin Phosphatase Rho Interacting Protein                 | MPRIIP |  | GeneCard | DisGenet |
| 309<br>7 | Myelin Protein Zero Like 2                                 | MPZL2  |  |          | DisGenet |
| 309<br>8 | Muscle RAS Oncogene Homolog                                | MRAS   |  | GeneCard |          |
| 309<br>9 | Mannose Receptor C-Type 1                                  | MRC1   |  | GeneCard | DisGenet |
| 310<br>0 | MRE11 Homolog, Double Strand Break Repair Nuclease         | MRE11  |  | GeneCard |          |
| 310<br>1 | Maestro Heat Like Repeat Family Member 5 (Gene/Pseudogene) | MROH5  |  | GeneCard |          |
| 310<br>2 | Mitochondrial Ribosomal Protein L10                        | MRPL10 |  | GeneCard |          |
| 310<br>3 | Mitochondrial Ribosomal Protein L14                        | MRPL14 |  | GeneCard |          |
| 310<br>4 | Mitochondrial Ribosomal Protein S22                        | MRPS22 |  | GeneCard |          |

|          |                                                  |          |      |          |          |
|----------|--------------------------------------------------|----------|------|----------|----------|
| 310<br>5 | Mitochondrial Ribosomal Protein S36 Pseudogene 3 | MRPS36P3 |      | GeneCard |          |
| 310<br>6 | Myocardin Related Transcription Factor A         | MRTFA    |      | GeneCard | DisGenet |
| 310<br>7 | Myocardin Related Transcription Factor B         | MRTFB    |      | GeneCard |          |
| 310<br>8 | Membrane Spanning 4-Domains A1                   | MS4A1    |      |          | DisGenet |
| 310<br>9 | Membrane Spanning 4-Domains A13                  | MS4A13   |      | GeneCard |          |
| 311<br>0 | Membrane Spanning 4-Domains A2                   | MS4A2    |      | GeneCard |          |
| 311<br>1 | Membrane Spanning 4-Domains A4E                  | MS4A4E   |      | GeneCard |          |
| 311<br>2 | Minisatellite Binding Protein 1                  | MSBP1    |      | GeneCard |          |
| 311<br>3 | Minisatellite Binding Protein 2                  | MSBP2    |      | GeneCard |          |
| 311<br>4 | MSC Antisense RNA 1                              | MSC-AS1  |      | GeneCard |          |
| 311<br>5 | MutS Homolog 3                                   | MSH3     |      | GeneCard |          |
| 311<br>6 | MutS Homolog 4                                   | MSH4     |      | GeneCard |          |
| 311<br>7 | MutS Homolog 5                                   | MSH5     |      | GeneCard |          |
| 311<br>8 | Musashi RNA Binding Protein 2                    | MSI2     |      | GeneCard |          |
| 311<br>9 | Methylsterol Monooxygenase 1                     | MSMO1    |      | GeneCard |          |
| 312<br>0 | Macrophage scavenger receptor                    | MSR1     | OMIM | GeneCard | DisGenet |
| 312<br>1 | Methionine Sulfoxide Reductase A                 | MSRA     |      | GeneCard | DisGenet |
| 312<br>2 | Methionine Sulfoxide Reductase B1                | MSRB1    |      | GeneCard |          |
| 312<br>3 | Macrophage Stimulating 1                         | MST1     |      |          | DisGenet |
| 312<br>4 | Macrophage Stimulating 1 Receptor                | MST1R    |      |          | DisGenet |

|          |                                                                                                      |          |  |          |          |
|----------|------------------------------------------------------------------------------------------------------|----------|--|----------|----------|
| 312<br>5 | Myostatin                                                                                            | MSTN     |  | GeneCard | DisGenet |
| 312<br>6 | Msh Homeobox 2                                                                                       | MSX2     |  | GeneCard |          |
| 312<br>7 | Metallothionein 1F                                                                                   | MT1F     |  |          | DisGenet |
| 312<br>8 | Metallothionein 1X                                                                                   | MT1X     |  | GeneCard |          |
| 312<br>9 | Metallothionein 2A                                                                                   | MT2A     |  | GeneCard | DisGenet |
| 313<br>0 | Metallothionein 3                                                                                    | MT3      |  | GeneCard |          |
| 313<br>1 | Metastasis Associated 1                                                                              | MTA1     |  | GeneCard |          |
| 313<br>2 | Metastasis Associated 1 Family Member 2                                                              | MTA2     |  | GeneCard |          |
| 313<br>3 | Metastasis Associated 1 Family Member 3                                                              | MTA3     |  | GeneCard |          |
| 313<br>4 | Methylthioadenosine Phosphorylase                                                                    | MTAP     |  | GeneCard | DisGenet |
| 313<br>5 | Mitochondrially Encoded ATP Synthase Membrane Subunit 6                                              | MT-ATP6  |  | GeneCard |          |
| 313<br>6 | Mitochondrially Encoded Cytochrome C Oxidase I                                                       | MT-CO1   |  | GeneCard |          |
| 313<br>7 | Mitochondrially Encoded Cytochrome C Oxidase II                                                      | MT-CO2   |  | GeneCard |          |
| 313<br>8 | MT-CO2 Pseudogene 12                                                                                 | MTCO2P12 |  |          | DisGenet |
| 313<br>9 | Mitochondrially Encoded Cytochrome C Oxidase III                                                     | MT-CO3   |  | GeneCard |          |
| 314<br>0 | Mitochondrially Encoded Cytochrome B                                                                 | MT-CYB   |  | GeneCard |          |
| 314<br>1 | Mitochondrial Fission Process 1                                                                      | MTFP1    |  | GeneCard |          |
| 314<br>2 | Methylenetetrahydrofolate Dehydrogenase, Cyclohydrolase and Formyltetrahydrofolate Synthetase 1      | MTHFD1   |  | GeneCard |          |
| 314<br>3 | Methylenetetrahydrofolate Dehydrogenase (NADP+ Dependent) 1 Like                                     | MTHFD1L  |  | GeneCard |          |
| 314<br>4 | Methylenetetrahydrofolate Dehydrogenase (NADP+ Dependent) 2, Methenyltetrahydrofolate Cyclohydrolase | MTHFD2   |  | GeneCard | DisGenet |

|          |                                                                       |           |  |          |          |
|----------|-----------------------------------------------------------------------|-----------|--|----------|----------|
| 314<br>5 | Methylenetetrahydrofolate Reductase                                   | MTHFR     |  | GeneCard | DisGenet |
| 314<br>6 | Methenyltetrahydrofolate Synthetase                                   | MTHFS     |  | GeneCard |          |
| 314<br>7 | Mitochondrially Encoded Long Non-Coding Cardiac Associated RNA        | MT-LIPCAR |  | GeneCard |          |
| 314<br>8 | Myotubularin 1                                                        | MTM1      |  | GeneCard |          |
| 314<br>9 | Myotubularin Related Protein 2                                        | MTMR2     |  | GeneCard |          |
| 315<br>0 | Myotubularin Related Protein 6                                        | MTMR6     |  | GeneCard |          |
| 315<br>1 | Mitochondrially Encoded NADH:Ubiquinone Oxidoreductase Core Subunit 1 | MT-ND1    |  | GeneCard |          |
| 315<br>2 | Mitochondrially Encoded NADH:Ubiquinone Oxidoreductase Core Subunit 2 | MT-ND2    |  | GeneCard |          |
| 315<br>3 | Mitochondrially Encoded NADH:Ubiquinone Oxidoreductase Core Subunit 6 | MT-ND6    |  | GeneCard |          |
| 315<br>4 | Melatonin Receptor 1A                                                 | MTNR1A    |  | GeneCard |          |
| 315<br>5 | Melatonin Receptor 1B                                                 | MTNR1B    |  | GeneCard |          |
| 315<br>6 | Mitochondrial TRNA Translation Optimization 1                         | MTO1      |  | GeneCard |          |
| 315<br>7 | Mechanistic Target of Rapamycin Kinase                                | MTOR      |  | GeneCard | DisGenet |
| 315<br>8 | Myotrophin                                                            | MTPN      |  | GeneCard |          |
| 315<br>9 | 5-Methyltetrahydrofolate-Homocysteine Methyltransferase               | MTR       |  | GeneCard |          |
| 316<br>0 | Mitochondrially Encoded 16S RRNA                                      | MT-RNR2   |  | GeneCard |          |
| 316<br>1 | MT-RNR2 Like 8 (Pseudogene)                                           | MTRNR2L8  |  | GeneCard |          |
| 316<br>2 | 5-Methyltetrahydrofolate-Homocysteine Methyltransferase Reductase     | MTRR      |  | GeneCard | DisGenet |
| 316<br>3 | MTSS I-BAR Domain Containing 1                                        | MTSS1     |  |          | DisGenet |
| 316<br>4 | Mitochondrially Encoded TRNA-Ile (AUU/C)                              | MT-TI     |  | GeneCard |          |



|          |                                               |        |      |          |          |
|----------|-----------------------------------------------|--------|------|----------|----------|
| 316<br>5 | Mitochondrially Encoded tRNA-Leu (UUA/G) 1    | MT-TL1 |      | GeneCard |          |
| 316<br>6 | Microsomal Triglyceride Transfer Protein      | MTTP   | OMIM | GeneCard | DisGenet |
| 316<br>7 | Microtubule Associated Scaffold Protein 1     | MTUS1  |      | GeneCard |          |
| 316<br>8 | Mucin 1, Cell Surface Associated              | MUC1   |      | GeneCard | DisGenet |
| 316<br>9 | Mucin 16, Cell Surface Associated             | MUC16  |      | GeneCard | DisGenet |
| 317<br>0 | MUS81 Structure-Specific Endonuclease Subunit | MUS81  |      | GeneCard |          |
| 317<br>1 | Muscle Associated Receptor Tyrosine Kinase    | MUSK   |      | GeneCard |          |
| 317<br>2 | MutY DNA Glycosylase                          | MUTYH  |      | GeneCard |          |
| 317<br>3 | Mevalonate Kinase                             | MVK    |      | GeneCard |          |
| 317<br>4 | Major Vault Protein                           | MVP    |      | GeneCard | DisGenet |
| 317<br>5 | MX Dynamin Like GTPase 1                      | MX1    |      | GeneCard |          |
| 317<br>6 | MAX Dimerization Protein 1                    | MXD1   |      | GeneCard |          |
| 317<br>7 | MAX Dimerization Protein 3                    | MXD3   |      | GeneCard |          |
| 317<br>8 | Matrix Remodeling Associated 7                | MXRA7  |      | GeneCard |          |
| 317<br>9 | MYB Proto-Oncogene, Transcription Factor      | MYB    |      | GeneCard |          |
| 318<br>0 | MYB Proto-Oncogene Like 2                     | MYBL2  |      | GeneCard |          |
| 318<br>1 | Myosin Binding Protein C1                     | MYBPC1 |      | GeneCard |          |
| 318<br>2 | Myosin Binding Protein C2                     | MYBPC2 |      | GeneCard |          |
| 318<br>3 | Myosin Binding Protein C3                     | MYBPC3 |      | GeneCard |          |
| 318<br>4 | Myosin Binding Protein H Like                 | MYBPHL |      | GeneCard |          |

|          |                                                   |        |      |          |          |
|----------|---------------------------------------------------|--------|------|----------|----------|
| 318<br>5 | MYC Proto-Oncogene, BHLH Transcription Factor     | MYC    |      | GeneCard | DisGenet |
| 318<br>6 | MYCN Proto-Oncogene, BHLH Transcription Factor    | MYCN   |      | GeneCard |          |
| 318<br>7 | MYD88 Innate Immune Signal Transduction Adaptor   | MYD88  | OMIM | GeneCard | DisGenet |
| 318<br>8 | Myeloid Derived Growth Factor                     | MYDGF  |      | GeneCard | DisGenet |
| 318<br>9 | Myosin Heavy Chain 10                             | MYH10  |      | GeneCard |          |
| 319<br>0 | Myosin Heavy Chain 11                             | MYH11  |      | GeneCard | DisGenet |
| 319<br>1 | Myosin Heavy Chain 14                             | MYH14  |      | GeneCard |          |
| 319<br>2 | Myosin Heavy Chain 15                             | MYH15  |      | GeneCard | DisGenet |
| 319<br>3 | Myosin Heavy Chain 6                              | MYH6   |      | GeneCard |          |
| 319<br>4 | Myosin Heavy Chain 7                              | MYH7   |      | GeneCard |          |
| 319<br>5 | Myosin Heavy Chain 7B                             | MYH7B  |      | GeneCard |          |
| 319<br>6 | Myosin Heavy Chain 9                              | MYH9   |      | GeneCard | DisGenet |
| 319<br>7 | Myosin Light Chain 12A                            | MYL12A |      | GeneCard |          |
| 319<br>8 | Myosin Light Chain 2                              | MYL2   |      | GeneCard |          |
| 319<br>9 | Myosin Light Chain 3                              | MYL3   |      | GeneCard |          |
| 320<br>0 | Myosin Light Chain 4                              | MYL4   |      | GeneCard |          |
| 320<br>1 | Myosin Light Chain 6                              | MYL6   |      | GeneCard |          |
| 320<br>2 | Myosin Regulatory Light Chain Interacting Protein | MYLIP  |      | GeneCard |          |
| 320<br>3 | Myosin Light Chain Kinase                         | MYLK   |      | GeneCard | DisGenet |
| 320<br>4 | Myosin Light Chain Kinase 3                       | MYLK3  |      | GeneCard |          |

|          |                                                      |          |  |          |          |
|----------|------------------------------------------------------|----------|--|----------|----------|
| 320<br>5 | MYLK Antisense RNA 1                                 | MYLK-AS1 |  | GeneCard |          |
| 320<br>6 | Moyamoya Disease 4                                   | MYMY4    |  | GeneCard |          |
| 320<br>7 | Myosin IE                                            | MYO1E    |  | GeneCard |          |
| 320<br>8 | Myosin VA                                            | MYO5A    |  | GeneCard |          |
| 320<br>9 | Myosin VIIA                                          | MYO7A    |  | GeneCard |          |
| 321<br>0 | Myosin VIIB                                          | MYO7B    |  | GeneCard |          |
| 321<br>1 | Myocardin                                            | MYOCD    |  | GeneCard | DisGenet |
| 321<br>2 | Myogenic Differentiation 1                           | MYOD1    |  | GeneCard |          |
| 321<br>3 | Myomesin 1                                           | MYOM1    |  | GeneCard |          |
| 321<br>4 | Myomesin 3                                           | MYOM3    |  | GeneCard |          |
| 321<br>5 | Myotilin                                             | MYOT     |  | GeneCard |          |
| 321<br>6 | Myozenin 1                                           | MYOZ1    |  | GeneCard |          |
| 321<br>7 | Myozenin 2                                           | MYOZ2    |  | GeneCard |          |
| 321<br>8 | Myopalladin                                          | MYPN     |  | GeneCard |          |
| 321<br>9 | Myocardial Zonula Adherens Protein                   | MYZAP    |  | GeneCard |          |
| 322<br>0 | Marginal Zone B And B1 Cell Specific Protein         | MZB1     |  |          | DisGenet |
| 322<br>1 | N-Alpha-Acetyltransferase 25, Natb Auxiliary Subunit | NAA25    |  |          | DisGenet |
| 322<br>2 | N-Acylethanolamine Acid Amidase                      | NAAA     |  |          | DisGenet |
| 322<br>3 | NGFI-A Binding Protein 1                             | NAB1     |  | GeneCard |          |
| 322<br>4 | NGFI-A Binding Protein 2                             | NAB2     |  | GeneCard |          |

|          |                                                   |          |  |          |          |
|----------|---------------------------------------------------|----------|--|----------|----------|
| 322<br>5 | Nucleic Acid Binding Protein 1                    | NABP1    |  | GeneCard |          |
| 322<br>6 | N-Acetyl-Alpha-Glucosaminidase                    | NAGLU    |  |          | DisGenet |
| 322<br>7 | NALCN Channel Auxiliary Factor 1                  | NALF1    |  | GeneCard |          |
| 322<br>8 | Nicotinamide Phosphoribosyltransferase            | NAMPT    |  | GeneCard | DisGenet |
| 322<br>9 | Nanos C2HC-Type Zinc Finger 2                     | NANOS2   |  |          | DisGenet |
| 323<br>0 | Nanos C2HC-Type Zinc Finger 3                     | NANOS3   |  | GeneCard | DisGenet |
| 323<br>1 | N-Acetylneuraminate Synthase                      | NANS     |  |          | DisGenet |
| 323<br>2 | Nucleosome Assembly Protein 1 Like 1 Pseudogene 1 | NAP1L1P1 |  | GeneCard |          |
| 323<br>3 | NSF Attachment Protein Gamma                      | NAPG     |  | GeneCard |          |
| 323<br>4 | Nuclear Autoantigenic Sperm Protein Pseudogene 1  | NASPP1   |  | GeneCard |          |
| 323<br>5 | N-Acetyltransferase 1                             | NAT1     |  | GeneCard |          |
| 323<br>6 | N-Acetyltransferase 10                            | NAT10    |  | GeneCard |          |
| 323<br>7 | N-Acetyltransferase 2                             | NAT2     |  | GeneCard | DisGenet |
| 323<br>8 | N-Acetyltransferase 8 (Putative)                  | NAT8     |  | GeneCard |          |
| 323<br>9 | Neuron Navigator 1                                | NAV1     |  | GeneCard |          |
| 324<br>0 | NAD(P)HX Epimerase                                | NAXE     |  | GeneCard | DisGenet |
| 324<br>1 | NBAS subunit of NRZ tethering complex             | NBAS     |  |          | DisGenet |
| 324<br>2 | Neurobeachin Like 2                               | NBEAL2   |  |          | DisGenet |
| 324<br>3 | NBL1, DAN Family BMP Antagonist                   | NBL1     |  | GeneCard | DisGenet |
| 324<br>4 | Nibrin                                            | NBN      |  | GeneCard | DisGenet |

|          |                                              |         |      |          |          |
|----------|----------------------------------------------|---------|------|----------|----------|
| 324<br>5 | NBPF Member 3                                | NBPF3   |      | GeneCard |          |
| 324<br>6 | Non-SMC Condensin II Complex Subunit H2      | NCAPH2  |      | GeneCard |          |
| 324<br>7 | Neutral Cholesterol Ester Hydrolase 1        | NCEH1   | OMIM | GeneCard | DisGenet |
| 324<br>8 | Neutrophil Cytosolic Factor 1                | NCF1    |      | GeneCard | DisGenet |
| 324<br>9 | Neutrophil Cytosolic Factor 2                | NCF2    |      | GeneCard | DisGenet |
| 325<br>0 | NCK Adaptor Protein 1                        | NCK1    |      | GeneCard |          |
| 325<br>1 | Nucleolin                                    | NCL     |      | GeneCard |          |
| 325<br>2 | Nuclear Receptor Coactivator 1               | NCOA1   |      | GeneCard |          |
| 325<br>3 | Nuclear Receptor Coactivator 2               | NCOA2   |      | GeneCard |          |
| 325<br>4 | Nuclear Receptor Coactivator 3               | NCOA3   |      | GeneCard |          |
| 325<br>5 | Nuclear Receptor Coactivator 5               | NCOA5   |      | GeneCard |          |
| 325<br>6 | Nuclear Receptor Corepressor 1               | NCOR1   |      | GeneCard | DisGenet |
| 325<br>7 | Nuclear Receptor Corepressor 2               | NCOR2   |      | GeneCard |          |
| 325<br>8 | Natural Cytotoxicity Triggering Receptor 2   | NCR2    |      | GeneCard |          |
| 325<br>9 | Non-Protein Coding RNA, Upstream Of F2R/PAR1 | NCRUPAR |      | GeneCard |          |
| 326<br>0 | Nicastrin                                    | NCSTN   |      | GeneCard |          |
| 326<br>1 | NudE Neurodevelopment Protein 1              | NDE1    |      | GeneCard |          |
| 326<br>2 | Norrin Cystine Knot Growth Factor NDP        | NDP     |      | GeneCard |          |
| 326<br>3 | N-Myc Downstream Regulated 1                 | NDRG1   |      | GeneCard |          |
| 326<br>4 | NDRG Family Member 2                         | NDRG2   |      | GeneCard |          |

|          |                                                          |         |  |          |          |
|----------|----------------------------------------------------------|---------|--|----------|----------|
| 326<br>5 | NADH:Ubiquinone Oxidoreductase Subunit A10               | NDUFA10 |  | GeneCard |          |
| 326<br>6 | NADH:Ubiquinone Oxidoreductase Subunit A2                | NDUFA2  |  |          | DisGenet |
| 326<br>7 | NADH:Ubiquinone Oxidoreductase Subunit A9                | NDUFA9  |  | GeneCard |          |
| 326<br>8 | NADH:Ubiquinone Oxidoreductase Subunit AB1               | NDUFAB1 |  |          | DisGenet |
| 326<br>9 | NADH:Ubiquinone Oxidoreductase Complex Assembly Factor 2 | NDUFAF2 |  | GeneCard |          |
| 327<br>0 | NADH:Ubiquinone Oxidoreductase Subunit B4                | NDUFB4  |  | GeneCard |          |
| 327<br>1 | NADH:Ubiquinone Oxidoreductase Subunit B8                | NDUFB8  |  | GeneCard |          |
| 327<br>2 | NADH:Ubiquinone Oxidoreductase Core Subunit S2           | NDUFS2  |  | GeneCard |          |
| 327<br>3 | NADH:Ubiquinone Oxidoreductase Subunit S4                | NDUFS4  |  | GeneCard |          |
| 327<br>4 | NADH:Ubiquinone Oxidoreductase Subunit S6                | NDUFS6  |  | GeneCard |          |
| 327<br>5 | NADH:Ubiquinone Oxidoreductase Core Subunit V1           | NDUFV1  |  | GeneCard |          |
| 327<br>6 | Nuclear Paraspeckle Assembly Transcript 1                | NEAT1   |  | GeneCard | DisGenet |
| 327<br>7 | Nebulette                                                | NEBL    |  | GeneCard |          |
| 327<br>8 | Nectin Cell Adhesion Molecule 1                          | NECTIN1 |  |          | DisGenet |
| 327<br>9 | Nectin Cell Adhesion Molecule 2                          | NECTIN2 |  | GeneCard | DisGenet |
| 328<br>0 | NEDD4 E3 Ubiquitin Protein Ligase                        | NEDD4   |  | GeneCard | DisGenet |
| 328<br>1 | NEDD8 Ubiquitin Like Modifier                            | NEDD8   |  | GeneCard |          |
| 328<br>2 | Neurofilament Light Chain                                | NEFL    |  | GeneCard |          |
| 328<br>3 | Nei Like DNA Glycosylase 1                               | NEIL1   |  | GeneCard |          |
| 328<br>4 | Nei Like DNA Glycosylase 2                               | NEIL2   |  | GeneCard |          |

|          |                                                          |          |      |          |          |
|----------|----------------------------------------------------------|----------|------|----------|----------|
| 328<br>5 | Nei Like DNA Glycosylase 3                               | NEIL3    |      | GeneCard |          |
| 328<br>6 | NIMA Related Kinase 7                                    | NEK7     |      | GeneCard |          |
| 328<br>7 | NIMA Related Kinase 9                                    | NEK9     |      | GeneCard |          |
| 328<br>8 | Nestin                                                   | NES      |      | GeneCard | DisGenet |
| 328<br>9 | Neuropilin And Tolloid Like 1                            | NETO1    |      | GeneCard |          |
| 329<br>0 | Neuraminidase 1                                          | NEU1     | OMIM | GeneCard | DisGenet |
| 329<br>1 | Neuraminidase 3                                          | NEU3     |      | GeneCard |          |
| 329<br>2 | Neuralized E3 Ubiquitin Protein Ligase 1                 | NEURL1   |      | GeneCard |          |
| 329<br>3 | Nexilin F-Actin Binding Protein                          | NEXN     | OMIM | GeneCard | DisGenet |
| 329<br>4 | NEXN Antisense RNA 1                                     | NEXN-AS1 | OMIM | GeneCard | DisGenet |
| 329<br>5 | Neurofibromin 1                                          | NF1      |      | GeneCard | DisGenet |
| 329<br>6 | NF2, Moesin-Ezrin-Radixin Like (MERLIN) Tumor Suppressor | NF2      |      | GeneCard |          |
| 329<br>7 | NFAT Activating Protein With ITAM Motif 1                | NFAM1    |      | GeneCard |          |
| 329<br>8 | Nuclear Factor Of Activated T Cells 5                    | NFAT5    |      | GeneCard | DisGenet |
| 329<br>9 | Nuclear Factor Of Activated T Cells 1                    | NFATC1   |      | GeneCard |          |
| 330<br>0 | Nuclear Factor Of Activated T Cells 2                    | NFATC2   |      | GeneCard |          |
| 330<br>1 | Nuclear Factor Of Activated T Cells 3                    | NFATC3   |      | GeneCard |          |
| 330<br>2 | Nuclear Factor Of Activated T Cells 4                    | NFATC4   |      | GeneCard |          |
| 330<br>3 | Nuclear Factor, Erythroid 2                              | NFE2     |      |          | DisGenet |
| 330<br>4 | NFE2 Like BZIP Transcription Factor 1                    | NFE2L1   |      | GeneCard |          |

|          |                                                     |           |      |          |          |
|----------|-----------------------------------------------------|-----------|------|----------|----------|
| 330<br>5 | NFE2 Like BZIP Transcription Factor 2               | NFE2L2    |      | GeneCard | DisGenet |
| 330<br>6 | Nuclear Factor I A                                  | NFIA      |      | GeneCard | DisGenet |
| 330<br>7 | NFIA Antisense RNA 1                                | NFIA-AS1  |      | GeneCard |          |
| 330<br>8 | Nuclear Factor Kappa B Subunit 1                    | NFKB1     | OMIM | GeneCard | DisGenet |
| 330<br>9 | Nuclear Factor Kappa B Subunit 2                    | NFKB2     | OMIM | GeneCard | DisGenet |
| 331<br>0 | NFKB Inhibitor Alpha                                | NFKBIA    |      | GeneCard | DisGenet |
| 331<br>1 | NFKB Inhibitor Beta                                 | NFKBIB    |      | GeneCard |          |
| 331<br>2 | NFKB Inhibitor Epsilon                              | NFKBIE    |      | GeneCard |          |
| 331<br>3 | NFKB Inhibitor Like 1                               | NFKBIL1   |      | GeneCard |          |
| 331<br>4 | NFS1 Cysteine Desulfurase                           | NFS1      |      | GeneCard |          |
| 331<br>5 | Neuroglobin                                         | NGB       |      | GeneCard | DisGenet |
| 331<br>6 | Neuronal Guanine Nucleotide Exchange Factor         | NGEF      |      | GeneCard |          |
| 331<br>7 | Nerve Growth Factor                                 | NGF       |      | GeneCard |          |
| 331<br>8 | Nerve Growth Factor Receptor                        | NGFR      |      | GeneCard | DisGenet |
| 331<br>9 | Non-Homologous End Joining Factor 1                 | NHEJ1     |      | GeneCard |          |
| 332<br>0 | NHL Repeat Containing E3 Ubiquitin Protein Ligase 1 | NHLRC1    |      | GeneCard |          |
| 332<br>1 | NGG1 Interacting Factor 3 Like 1                    | NIF3L1    |      |          | DisGenet |
| 332<br>2 | Ninjurin 1                                          | NINJ1     |      | GeneCard |          |
| 332<br>3 | Ninjurin 2                                          | NINJ2     |      | GeneCard | DisGenet |
| 332<br>4 | Nipsnap Homolog 3B                                  | NIPSNAP3B |      | GeneCard |          |



|          |                                                        |           |      |          |          |
|----------|--------------------------------------------------------|-----------|------|----------|----------|
| 332<br>5 | Nischarin                                              | NISCH     |      | GeneCard | DisGenet |
| 332<br>6 | Nitrilase Family Member 2                              | NIT2      |      | GeneCard |          |
| 332<br>7 | NFKB Activating Protein Like                           | NKAPL     |      | GeneCard |          |
| 332<br>8 | NK2 Homeobox 5                                         | NKX2-5    |      | GeneCard | DisGenet |
| 332<br>9 | NLR Family CARD Domain Containing 4                    | NLRC4     |      | GeneCard |          |
| 333<br>0 | NLR Family Pyrin Domain Containing 1                   | NLRP1     |      | GeneCard |          |
| 333<br>1 | NLR Family Pyrin Domain Containing 11                  | NLRP11    |      | GeneCard |          |
| 333<br>2 | NLR Family Pyrin Domain Containing 12                  | NLRP12    |      | GeneCard |          |
| 333<br>3 | NLR Family, Pyrin Domain Containing 3                  | NLRP3     | OMIM | GeneCard | DisGenet |
| 333<br>4 | NLR Family Pyrin Domain Containing 5                   | NLRP5     |      | GeneCard |          |
| 333<br>5 | NME1-NME2 readthrough                                  | NME1-NME2 |      |          | DisGenet |
| 333<br>6 | NME/NM23 Nucleoside Diphosphate Kinase 2               | NME2      |      | GeneCard | DisGenet |
| 333<br>7 | NME/NM23 Nucleoside Diphosphate Kinase 4               | NME4      |      | GeneCard |          |
| 333<br>8 | NME/NM23 Family Member 8                               | NME8      |      | GeneCard |          |
| 333<br>9 | N-Myc And STAT Interactor                              | NMI       |      | GeneCard |          |
| 334<br>0 | Nicotinamide N-Methyltransferase                       | NNMT      |      | GeneCard | DisGenet |
| 334<br>1 | Nicotinamide Nucleotide Transhydrogenase               | NNT       |      |          | DisGenet |
| 334<br>2 | NOBOX Oogenesis Homeobox                               | NOBOX     |      | GeneCard |          |
| 334<br>3 | Nucleotide Binding Oligomerization Domain Containing 1 | NOD1      |      | GeneCard | DisGenet |
| 334<br>4 | Nucleotide Binding Oligomerization Domain Containing 2 | NOD2      |      | GeneCard | DisGenet |

|          |                                           |        |      |          |          |
|----------|-------------------------------------------|--------|------|----------|----------|
| 334<br>5 | Noggin                                    | NOG    |      | GeneCard |          |
| 334<br>6 | Nucleolar Protein 3                       | NOL3   |      | GeneCard |          |
| 334<br>7 | NODAL Modulator 1                         | NOMO1  |      | GeneCard |          |
| 334<br>8 | NODAL Modulator 2                         | NOMO2  |      | GeneCard |          |
| 334<br>9 | NODAL Modulator 3                         | NOMO3  |      | GeneCard |          |
| 335<br>0 | NOP2 Nucleolar Protein                    | NOP2   |      |          | DisGenet |
| 335<br>1 | Non-Coding RNA Activated by DNA Damage    | NORAD  |      | GeneCard | DisGenet |
| 335<br>2 | Nitric Oxide Synthase 1                   | NOS1   |      | GeneCard | DisGenet |
| 335<br>3 | Nitric Oxide Synthase 1 Adaptor Protein   | NOS1AP |      | GeneCard | DisGenet |
| 335<br>4 | Nitric Oxide Synthase 2                   | NOS2   |      | GeneCard | DisGenet |
| 335<br>5 | Nitric oxide synthase 3, endothelial cell | NOS3   | OMIM | GeneCard | DisGenet |
| 335<br>6 | Nitric Oxide Synthase Interacting Protein | NOSIP  |      | GeneCard |          |
| 335<br>7 | Notch Receptor 1                          | NOTCH1 |      | GeneCard | DisGenet |
| 335<br>8 | Notch Receptor 2                          | NOTCH2 |      | GeneCard | DisGenet |
| 335<br>9 | Notch Receptor 3                          | NOTCH3 |      | GeneCard | DisGenet |
| 336<br>0 | Notch Receptor 4                          | NOTCH4 |      | GeneCard |          |
| 336<br>1 | NADPH Oxidase 1                           | NOX1   |      | GeneCard | DisGenet |
| 336<br>2 | NADPH Oxidase 4                           | NOX4   |      | GeneCard | DisGenet |
| 336<br>3 | NADPH Oxidase 5                           | NOX5   |      | GeneCard | DisGenet |
| 336<br>4 | NADPH Oxidase Activator 1                 | NOXA1  |      | GeneCard | DisGenet |

|          |                                                   |        |      |          |          |
|----------|---------------------------------------------------|--------|------|----------|----------|
| 336<br>5 | NADPH Oxidase Organizer 1                         | NOXO1  |      | GeneCard |          |
| 336<br>6 | Neuropeptide B                                    | NPB    |      | GeneCard |          |
| 336<br>7 | NPC Intracellular Cholesterol Transporter 1       | NPC1   |      | GeneCard | DisGenet |
| 336<br>8 | NPC1-like intracellular cholesterol transporter 1 | NPC1L1 | OMIM | GeneCard | DisGenet |
| 336<br>9 | NPC1 Like Intracellular Cholesterol Transporter 1 | NPC2   |      | GeneCard |          |
| 337<br>0 | NPC Intracellular Cholesterol Transporter 2       | NPEPPS |      | GeneCard | DisGenet |
| 337<br>1 | NPHS1 Adhesion Molecule, Nephlin                  | NPHS1  |      | GeneCard |          |
| 337<br>2 | NPHS2 Stomatin Family Member, Podocin             | NPHS2  |      | GeneCard | DisGenet |
| 337<br>3 | Nucleophosmin 1                                   | NPM1   |      | GeneCard |          |
| 337<br>4 | Nephronectin                                      | NPNT   |      | GeneCard |          |
| 337<br>5 | Natriuretic Peptide A                             | NPPA   |      | GeneCard | DisGenet |
| 337<br>6 | Natriuretic Peptide B                             | NPPB   |      | GeneCard | DisGenet |
| 337<br>7 | Natriuretic Peptide C                             | NPPC   |      | GeneCard | DisGenet |
| 337<br>8 | Natriuretic Peptide Receptor 1                    | NPR1   |      | GeneCard |          |
| 337<br>9 | Natriuretic Peptide Receptor 2                    | NPR2   |      | GeneCard |          |
| 338<br>0 | Natriuretic Peptide Receptor 3                    | NPR3   |      | GeneCard |          |
| 338<br>1 | Neuropeptide S                                    | NPS    |      | GeneCard |          |
| 338<br>2 | Neuronal Pentraxin Receptor                       | NPTXR  |      | GeneCard |          |
| 338<br>3 | Neuropeptide VF Precursor                         | NPVF   |      | GeneCard |          |
| 338<br>4 | Neuropeptide Y                                    | NPY    | OMIM | GeneCard | DisGenet |

|          |                                               |       |      |          |          |
|----------|-----------------------------------------------|-------|------|----------|----------|
| 338<br>5 | Neuropeptide Y Receptor Y1                    | NPY1R |      | GeneCard |          |
| 338<br>6 | Neuropeptide Y Receptor Y4                    | NPY4R |      | GeneCard |          |
| 338<br>7 | Neuropeptide Y Receptor Y5                    | NPY5R |      | GeneCard |          |
| 338<br>8 | NAD(P)H Quinone Dehydrogenase 1               | NQO1  |      | GeneCard | DisGenet |
| 338<br>9 | Nuclear Receptor Subfamily 0 Group B Member 1 | NR0B1 |      | GeneCard | DisGenet |
| 339<br>0 | Nuclear Receptor Subfamily 0 Group B Member 2 | NR0B2 |      |          | DisGenet |
| 339<br>1 | Nuclear Receptor Subfamily 1 Group D Member 1 | NR1D1 |      | GeneCard | DisGenet |
| 339<br>2 | Nuclear Receptor Subfamily 1 Group D Member 2 | NR1D2 |      | GeneCard |          |
| 339<br>3 | Nuclear Receptor Subfamily 1 Group H Member 2 | NR1H2 |      | GeneCard |          |
| 339<br>4 | Nuclear Receptor Subfamily 1 Group H Member 3 | NR1H3 | OMIM | GeneCard | DisGenet |
| 339<br>5 | Nuclear Receptor Subfamily 1 Group H Member 4 | NR1H4 |      | GeneCard | DisGenet |
| 339<br>6 | Nuclear Receptor Subfamily 1 Group I Member 2 | NR1I2 |      | GeneCard | DisGenet |
| 339<br>7 | Nuclear Receptor Subfamily 1 Group I Member 3 | NR1I3 |      | GeneCard | DisGenet |
| 339<br>8 | Nuclear Receptor Subfamily 2 Group F Member 2 | NR2F2 |      | GeneCard | DisGenet |
| 339<br>9 | Nuclear Receptor Subfamily 3 Group C Member 1 | NR3C1 |      | GeneCard | DisGenet |
| 340<br>0 | Nuclear Receptor Subfamily 3 Group C Member 2 | NR3C2 |      | GeneCard | DisGenet |
| 340<br>1 | Nuclear Receptor Subfamily 4 Group A Member 1 | NR4A1 |      | GeneCard | DisGenet |
| 340<br>2 | Nuclear Receptor Subfamily 4 Group A Member 2 | NR4A2 |      | GeneCard |          |
| 340<br>3 | Nuclear Receptor Subfamily 4 Group A Member 3 | NR4A3 |      | GeneCard | DisGenet |
| 340<br>4 | Nuclear Receptor Subfamily 5 Group A Member 1 | NR5A1 |      | GeneCard |          |

|          |                                                          |       |  |          |          |
|----------|----------------------------------------------------------|-------|--|----------|----------|
| 340<br>5 | Nuclear Receptor Subfamily 5 Group A Member 2            | NR5A2 |  | GeneCard | DisGenet |
| 340<br>6 | Nuclear Receptor Subfamily 6 Group A Member 1            | NR6A1 |  | GeneCard | DisGenet |
| 340<br>7 | Nebulin Related Anchoring Protein                        | NRAP  |  | GeneCard |          |
| 340<br>8 | Nuclear Receptor Binding Factor 2                        | NRBF2 |  | GeneCard |          |
| 340<br>9 | Nuclear Respiratory Factor 1                             | NRF1  |  | GeneCard | DisGenet |
| 341<br>0 | Neuregulin 1                                             | NRG1  |  | GeneCard | DisGenet |
| 341<br>1 | Neuregulin 3                                             | NRG3  |  | GeneCard |          |
| 341<br>2 | Neuregulin 4                                             | NRG4  |  | GeneCard | DisGenet |
| 341<br>3 | Nuclear Receptor Interacting Protein 1                   | NRIP1 |  | GeneCard | DisGenet |
| 341<br>4 | Neuropilin 1                                             | NRP1  |  | GeneCard | DisGenet |
| 341<br>5 | Neuropilin 2                                             | NRP2  |  | GeneCard |          |
| 341<br>6 | Nuclear Receptor Binding SET Domain Protein 1            | NSD1  |  | GeneCard |          |
| 341<br>7 | N-Ethylmaleimide Sensitive Factor, Vesicle Fusing ATPase | NSF   |  | GeneCard |          |
| 341<br>8 | NOP2/Sun RNA Methyltransferase 5                         | NSUN5 |  |          | DisGenet |
| 341<br>9 | 5'-Nucleotidase Ecto                                     | NT5E  |  | GeneCard | DisGenet |
| 342<br>0 | Neurotrimin                                              | NTM   |  | GeneCard |          |
| 342<br>1 | Netrin 1                                                 | NTN1  |  | GeneCard | DisGenet |
| 342<br>2 | Netrin G1                                                | NTNG1 |  | GeneCard |          |
| 342<br>3 | Neurotrophic Receptor Tyrosine Kinase 1                  | NTRK1 |  | GeneCard |          |
| 342<br>4 | Neurotrophic Receptor Tyrosine Kinase 2                  | NTRK2 |  | GeneCard |          |

|          |                                                                |        |      |          |          |
|----------|----------------------------------------------------------------|--------|------|----------|----------|
| 342<br>5 | Negative Regulator of Ubiquitin Like Proteins 1                | NUB1   |      | GeneCard |          |
| 342<br>6 | Nucleobindin 2                                                 | NUCB2  |      | GeneCard |          |
| 342<br>7 | NudC Domain Containing 1                                       | NUDCD1 |      | GeneCard |          |
| 342<br>8 | Nudix Hydrolase 10                                             | NUDT10 |      | GeneCard |          |
| 342<br>9 | Nudix Hydrolase 6                                              | NUDT6  | OMIM | GeneCard |          |
| 343<br>0 | Nuclear GTPase, Germinal Center Associated                     | NUGGC  |      | GeneCard |          |
| 343<br>1 | Nuclear Mitotic Apparatus Protein 1                            | NUMA1  |      | GeneCard |          |
| 343<br>2 | NUMB Endocytic Adaptor Protein                                 | NUMB   |      | GeneCard |          |
| 343<br>3 | Nucleoporin 205                                                | NUP205 |      | GeneCard |          |
| 343<br>4 | Nucleoporin 62                                                 | NUP62  |      |          | DisGenet |
| 343<br>5 | Nucleoporin 93                                                 | NUP93  |      | GeneCard |          |
| 343<br>6 | Nucleoporin 98 And 96 Precursor                                | NUP98  |      | GeneCard |          |
| 343<br>7 | NUS1 Dehydrodolichyl Diphosphate Synthase Subunit              | NUS1   |      | GeneCard |          |
| 343<br>8 | Nuclear RNA Export Factor 5                                    | NXF5   |      | GeneCard |          |
| 343<br>9 | 2'-5'-Oligoadenylate Synthetase 1                              | OAS1   |      | GeneCard |          |
| 344<br>0 | 2'-5'-Oligoadenylate Synthetase Like                           | OASL   |      | GeneCard |          |
| 344<br>1 | Ornithine Decarboxylase Antizyme 1                             | OAZ1   |      | GeneCard |          |
| 344<br>2 | Obscurin, Cytoskeletal Calmodulin and Titin-Interacting RhoGEF | OBSCN  |      | GeneCard |          |
| 344<br>3 | Occludin                                                       | OCLN   |      |          | DisGenet |
| 344<br>4 | Ornithine Decarboxylase 1                                      | ODC1   |      | GeneCard |          |

|          |                                                             |          |      |          |          |
|----------|-------------------------------------------------------------|----------|------|----------|----------|
| 344<br>5 | Orofacial Cleft 1 Candidate 1                               | OFCC1    |      | GeneCard |          |
| 344<br>6 | O-GlcNAcase                                                 | OGA      |      |          | DisGenet |
| 344<br>7 | Oxoglutarate Dehydrogenase                                  | OGDH     |      | GeneCard |          |
| 344<br>8 | 8-Oxoguanine DNA Glycosylase                                | OGG1     |      | GeneCard | DisGenet |
| 344<br>9 | Osteoglycin                                                 | OGN      |      | GeneCard | DisGenet |
| 345<br>0 | Opa Interacting Protein 5                                   | OIP5     |      | GeneCard |          |
| 345<br>1 | OIP5 Antisense RNA 1                                        | OIP5-AS1 |      | GeneCard |          |
| 345<br>2 | Olfactomedin Like 2B                                        | OLFML2B  |      | GeneCard |          |
| 345<br>3 | Low density lipoprotein, oxidized, receptor 1               | OLR1     | OMIM | GeneCard | DisGenet |
| 345<br>4 | Osteomodulin                                                | OMD      |      | GeneCard |          |
| 345<br>5 | Olfactory Marker Protein                                    | OMP      |      | GeneCard |          |
| 345<br>6 | Opsin 3                                                     | OPN3     |      | GeneCard |          |
| 345<br>7 | Opioid Receptor Kappa 1                                     | OPRK1    |      |          | DisGenet |
| 345<br>8 | Opioid Receptor Mu 1                                        | OPRM1    |      | GeneCard |          |
| 345<br>9 | Optineurin                                                  | OPTN     |      | GeneCard |          |
| 346<br>0 | Olfactory Receptor Family 10 Subfamily A Member 4           | OR10A4   |      |          | DisGenet |
| 346<br>1 | Olfactory Receptor Family 13 Subfamily G Member 1           | OR13G1   |      | GeneCard |          |
| 346<br>2 | Olfactory Receptor Family 2 Subfamily B Member 7 Pseudogene | OR2B7P   |      | GeneCard |          |
| 346<br>3 | Olfactory Receptor Family 6 Subfamily A Member 2            | OR6A2    |      | GeneCard |          |
| 346<br>4 | ORAI Calcium Release-Activated Calcium Modulator 1          | ORAI1    |      | GeneCard | DisGenet |

|          |                                               |          |  |          |          |
|----------|-----------------------------------------------|----------|--|----------|----------|
| 346<br>5 | Orosomucoid 1                                 | ORM1     |  | GeneCard |          |
| 346<br>6 | ORMDL Sphingolipid Biosynthesis Regulator 3   | ORMDL3   |  | GeneCard | DisGenet |
| 346<br>7 | Oxysterol Binding Protein                     | OSBP     |  | GeneCard | DisGenet |
| 346<br>8 | Oxysterol Binding Protein 2                   | OSBP2    |  | GeneCard |          |
| 346<br>9 | Oxysterol Binding Protein Like 10             | OSBPL10  |  | GeneCard |          |
| 347<br>0 | Oxysterol Binding Protein Like 1A             | OSBPL1A  |  | GeneCard | DisGenet |
| 347<br>1 | Oxysterol Binding Protein Like 5              | OSBPL5   |  | GeneCard |          |
| 347<br>2 | Oxysterol Binding Protein Like 6              | OSBPL6   |  | GeneCard |          |
| 347<br>3 | Oxysterol Binding Protein Like 8              | OSBPL8   |  | GeneCard | DisGenet |
| 347<br>4 | Oxysterol Binding Protein Like 9              | OSBPL9   |  | GeneCard |          |
| 347<br>5 | Oxysterol Binding Protein Like 9 Pseudogene 2 | OSBPL9P2 |  | GeneCard |          |
| 347<br>6 | Osteoclast Associated Ig-Like Receptor        | OSCAR    |  | GeneCard | DisGenet |
| 347<br>7 | Oxidative Stress Induced Growth Inhibitor 1   | OSCP1    |  | GeneCard | DisGenet |
| 347<br>8 | Oxidative Stress Induced Growth Inhibitor 1   | OSGIN1   |  |          | DisGenet |
| 347<br>9 | Oncostatin M                                  | OSM      |  | GeneCard | DisGenet |
| 348<br>0 | Oncostatin M Receptor                         | OSMR     |  | GeneCard | DisGenet |
| 348<br>1 | Otoferlin                                     | OTOF     |  | GeneCard |          |
| 348<br>2 | OTU Deubiquitinase 7A                         | OTUD7A   |  | GeneCard |          |
| 348<br>3 | OTU Deubiquitinase 7B                         | OTUD7B   |  | GeneCard |          |
| 348<br>4 | OXA1L Mitochondrial Inner Membrane Protein    | OXA1L    |  | GeneCard |          |



|          |                                           |               |      |          |          |
|----------|-------------------------------------------|---------------|------|----------|----------|
| 348<br>5 | Oxoglutarate Receptor 1                   | OXGR1         |      | GeneCard |          |
| 348<br>6 | Oxytocin/Neurophysin I Prepropeptide      | OXT           |      | GeneCard |          |
| 348<br>7 | Oxytocin Receptor                         | OXTR          |      | GeneCard |          |
| 348<br>8 | Purinergic Receptor P2X 1                 | P2RX1         |      | GeneCard | DisGenet |
| 348<br>9 | Purinergic Receptor P2X 2                 | P2RX2         |      | GeneCard | DisGenet |
| 349<br>0 | Purinergic Receptor P2X 3                 | P2RX3         |      |          | DisGenet |
| 349<br>1 | Purinergic Receptor P2X 4                 | P2RX4         |      | GeneCard | DisGenet |
| 349<br>2 | Purinergic Receptor P2X 5                 | P2RX5         |      |          | DisGenet |
| 349<br>3 | P2RX5-TAX1BP3 readthrough (NMD candidate) | P2RX5-TAX1BP3 |      |          | DisGenet |
| 349<br>4 | Purinergic Receptor P2X 6                 | P2RX6         |      |          | DisGenet |
| 349<br>5 | Purinergic Receptor P2X 7                 | P2RX7         |      | GeneCard | DisGenet |
| 349<br>6 | Purinergic Receptor P2Y1                  | P2RY1         |      | GeneCard | DisGenet |
| 349<br>7 | Purinergic Receptor P2Y12                 | P2RY12        | OMIM | GeneCard | DisGenet |
| 349<br>8 | Purinergic Receptor P2Y13                 | P2RY13        |      |          | DisGenet |
| 349<br>9 | Purinergic Receptor P2Y2                  | P2RY2         |      | GeneCard | DisGenet |
| 350<br>0 | Pyrimidinergic Receptor P2Y4              | P2RY4         |      | GeneCard |          |
| 350<br>1 | Prolyl 4-Hydroxylase Subunit Alpha 1      | P4HA1         |      | GeneCard |          |
| 350<br>2 | Prolyl 4-Hydroxylase Subunit Alpha 2      | P4HA2         |      | GeneCard |          |
| 350<br>3 | Prolyl 4-Hydroxylase Subunit Alpha 3      | P4HA3         | OMIM | GeneCard |          |
| 350<br>4 | Prolyl 4-Hydroxylase Subunit Beta         | P4HB          |      | GeneCard | DisGenet |

|          |                                                                      |          |      |          |          |
|----------|----------------------------------------------------------------------|----------|------|----------|----------|
| 350<br>5 | Phosphofurin Acidic Cluster Sorting Protein 2                        | PACS2    |      |          | DisGenet |
| 350<br>6 | Peptidyl Arginine Deiminase 1                                        | PADI1    |      |          | DisGenet |
| 350<br>7 | Peptidyl Arginine Deiminase 4                                        | PADI4    |      | GeneCard | DisGenet |
| 350<br>8 | progesterone associated endometrial protein                          | PAEP     |      |          | DisGenet |
| 350<br>9 | Platelet Activating Factor Acetylhydrolase 1b Regulatory Subunit 1   | PAFAH1B1 |      | GeneCard |          |
| 351<br>0 | Platelet Activating Factor Acetylhydrolase 2                         | PAFAH2   |      | GeneCard |          |
| 351<br>1 | Phosphoprotein Membrane Anchor With Glycosphingolipid Microdomains 1 | PAG1     |      | GeneCard |          |
| 351<br>2 | Phenylalanine Hydroxylase                                            | PAH      |      | GeneCard | DisGenet |
| 351<br>3 | P21 (RAC1) Activated Kinase 1                                        | PAK1     |      | GeneCard | DisGenet |
| 351<br>4 | Phosphatase Domain Containing Paladin 1                              | PALD1    |      |          | DisGenet |
| 351<br>5 | Palladin, Cytoskeletal Associated Protein                            | PALLD    |      | GeneCard | DisGenet |
| 351<br>6 | Pannexin 1                                                           | PANX1    |      | GeneCard | DisGenet |
| 351<br>7 | Peripheral Arterial Occlusive Disease 1                              | PAOD1    |      | GeneCard |          |
| 351<br>8 | Polyamine Oxidase                                                    | PAOX     |      |          | DisGenet |
| 351<br>9 | Pappalysin 1                                                         | PAPPA    | OMIM | GeneCard | DisGenet |
| 352<br>0 | Progestin and AdipoQ Receptor Family Member 5                        | PAQR5    |      | GeneCard |          |
| 352<br>1 | Progestin and AdipoQ Receptor Family Member 7                        | PAQR7    |      |          | DisGenet |
| 352<br>2 | Par-3 Family Cell Polarity Regulator                                 | PARD3    |      | GeneCard |          |
| 352<br>3 | Parkinsonism Associated Deglycase                                    | PARK7    |      | GeneCard |          |
| 352<br>4 | Poly(ADP-Ribose) Polymerase 1                                        | PARP1    |      | GeneCard | DisGenet |

|          |                                              |        |  |          |          |
|----------|----------------------------------------------|--------|--|----------|----------|
| 352<br>5 | Poly(ADP-Ribose) Polymerase Family Member 14 | PARP14 |  | GeneCard |          |
| 352<br>6 | Poly(ADP-Ribose) Polymerase 2                | PARP2  |  | GeneCard |          |
| 352<br>7 | Poly(ADP-ribose) Polymerase Family Member 3  | PARP3  |  |          | DisGenet |
| 352<br>8 | Poly(ADP-Ribose) Polymerase Family Member 9  | PARP9  |  | GeneCard |          |
| 352<br>9 | Prostate Androgen-Regulated Transcript 1     | PART1  |  |          | DisGenet |
| 353<br>0 | Parvin Alpha                                 | PARVA  |  | GeneCard |          |
| 353<br>1 | Parvin Beta                                  | PARVB  |  | GeneCard |          |
| 353<br>2 | PATJ Crumbs Cell Polarity Complex Component  | PATJ   |  | GeneCard |          |
| 353<br>3 | POZ/BTB And AT Hook Containing Zinc Finger 1 | PATZ1  |  | GeneCard | DisGenet |
| 353<br>4 | Pro-Apoptotic WT1 Regulator                  | PAWR   |  | GeneCard |          |
| 353<br>5 | Paired Box 6                                 | PAX6   |  | GeneCard |          |
| 353<br>6 | PDZ Binding Kinase                           | PBK    |  | GeneCard |          |
| 353<br>7 | Polybromo 1                                  | PBRM1  |  | GeneCard |          |
| 353<br>8 | Pyruvate Carboxylase                         | PC     |  |          | DisGenet |
| 353<br>9 | Poly(RC) Binding Protein 1                   | PCBP1  |  | GeneCard |          |
| 354<br>0 | Propionyl-CoA Carboxylase Subunit Alpha      | PCCA   |  | GeneCard |          |
| 354<br>1 | Propionyl-CoA Carboxylase Subunit Beta       | PCCB   |  | GeneCard |          |
| 354<br>2 | Protocadherin Related 15                     | PCDH15 |  | GeneCard |          |
| 354<br>3 | Protocadherin 8                              | PCDH8  |  |          | DisGenet |
| 354<br>4 | Protocadherin 9                              | PCDH9  |  | GeneCard |          |

|          |                                                          |         |      |          |          |
|----------|----------------------------------------------------------|---------|------|----------|----------|
| 354<br>5 | Phosphorylated CTD Interacting Factor 1                  | PCIF1   |      | GeneCard |          |
| 354<br>6 | Phosphoenolpyruvate Carboxykinase 1                      | PCK1    |      | GeneCard |          |
| 354<br>7 | Phosphoenolpyruvate Carboxykinase 2, Mitochondrial       | PCK2    |      | GeneCard |          |
| 354<br>8 | PCNA Clamp Associated Factor                             | PCLAF   |      |          | DisGenet |
| 354<br>9 | Protein-L-Isoaspartate (D-Aspartate) O-Methyltransferase | PCMT1   |      | GeneCard |          |
| 355<br>0 | Proliferating Cell Nuclear Antigen                       | PCNA    |      | GeneCard | DisGenet |
| 355<br>1 | Procollagen C-Endopeptidase Enhancer                     | PCOLCE  |      |          | DisGenet |
| 355<br>2 | Procollagen C-Endopeptidase Enhancer 2                   | PCOLCE2 |      | GeneCard | DisGenet |
| 355<br>3 | Polycystic Ovary Syndrome 1                              | PCOS1   |      |          | DisGenet |
| 355<br>4 | Purkinje Cell Protein 4                                  | PCP4    |      |          | DisGenet |
| 355<br>5 | Proprotein Convertase Subtilisin/Kexin Type 1            | PCSK1   |      | GeneCard | DisGenet |
| 355<br>6 | Proprotein Convertase Subtilisin/Kexin Type 1 Inhibitor  | PCSK1N  |      | GeneCard |          |
| 355<br>7 | Proprotein Convertase Subtilisin/Kexin Type 2            | PCSK2   |      | GeneCard |          |
| 355<br>8 | Proprotein Convertase Subtilisin/Kexin Type 5            | PCSK5   | OMIM | GeneCard | DisGenet |
| 355<br>9 | Proprotein Convertase Subtilisin/Kexin Type 6            | PCSK6   |      | GeneCard | DisGenet |
| 356<br>0 | Proprotein Convertase Subtilisin/Kexin Type 7            | PCSK7   |      | GeneCard |          |
| 356<br>1 | Proprotein Convertase Subtilisin/Kexin Type 9            | PCSK9   |      | GeneCard | DisGenet |
| 356<br>2 | Prenylcysteine Oxidase 1                                 | PCYOX1  |      | GeneCard |          |
| 356<br>3 | Phosphate Cytidyltransferase 1A, Choline                 | PCYT1A  |      | GeneCard |          |
| 356<br>4 | Phosphate Cytidyltransferase 1, Choline, Beta            | PCYT1B  |      |          | DisGenet |

|          |                                             |           |      |          |          |
|----------|---------------------------------------------|-----------|------|----------|----------|
| 356<br>5 | Programmed Cell Death 1                     | PDCD1     |      | GeneCard |          |
| 356<br>6 | Programmed Cell Death 10                    | PDCD10    |      | GeneCard |          |
| 356<br>7 | Programmed Cell Death 4                     | PDCD4     |      | GeneCard | DisGenet |
| 356<br>8 | Programmed Cell Death 5                     | PDCD5     |      | GeneCard | DisGenet |
| 356<br>9 | Programmed Cell Death 6 Interacting Protein | PDCD6IP   |      | GeneCard | DisGenet |
| 357<br>0 | Phosphodiesterase 1A                        | PDE1A     | OMIM | GeneCard | DisGenet |
| 357<br>1 | Phosphodiesterase 1B                        | PDE1B     |      | GeneCard |          |
| 357<br>2 | Phosphodiesterase 1C                        | PDE1C     |      | GeneCard |          |
| 357<br>3 | Phosphodiesterase 3A                        | PDE3A     |      | GeneCard |          |
| 357<br>4 | Phosphodiesterase 3B                        | PDE3B     |      | GeneCard |          |
| 357<br>5 | Phosphodiesterase 4A                        | PDE4A     |      | GeneCard | DisGenet |
| 357<br>6 | Phosphodiesterase 4B                        | PDE4B     |      | GeneCard |          |
| 357<br>7 | Phosphodiesterase 4D                        | PDE4D     | OMIM | GeneCard | DisGenet |
| 357<br>8 | Phosphodiesterase 5A                        | PDE5A     |      | GeneCard | DisGenet |
| 357<br>9 | Phosphodiesterase 6A                        | PDE6A     |      | GeneCard |          |
| 358<br>0 | Phosphodiesterase 6H                        | PDE6H     |      | GeneCard |          |
| 358<br>1 | Phosphodiesterase 7B                        | PDE7B     |      | GeneCard |          |
| 358<br>2 | Phosphodiesterase 9A                        | PDE9A     |      | GeneCard | DisGenet |
| 358<br>3 | PDE9A Antisense RNA 1                       | PDE9A-AS1 |      | GeneCard |          |
| 358<br>4 | Platelet Derived Growth Factor Subunit A    | PDGFA     | OMIM | GeneCard | DisGenet |

|          |                                                        |        |  |          |          |
|----------|--------------------------------------------------------|--------|--|----------|----------|
| 358<br>5 | Platelet Derived Growth Factor Subunit B               | PDGFB  |  | GeneCard | DisGenet |
| 358<br>6 | Platelet Derived Growth Factor C                       | PDGFC  |  | GeneCard | DisGenet |
| 358<br>7 | Platelet Derived Growth Factor D                       | PDGFD  |  | GeneCard | DisGenet |
| 358<br>8 | Platelet Derived Growth Factor Receptor Alpha          | PDGFRA |  | GeneCard |          |
| 358<br>9 | Platelet Derived Growth Factor Receptor Beta           | PDGFRB |  | GeneCard | DisGenet |
| 359<br>0 | Protein Disulfide Isomerase Family A Member 2          | PDIA2  |  | GeneCard | DisGenet |
| 359<br>1 | Protein Disulfide Isomerase Family A Member 3          | PDIA3  |  | GeneCard |          |
| 359<br>2 | Protein Disulfide Isomerase Family A Member 2          | PDIK1L |  |          | DisGenet |
| 359<br>3 | Pyruvate Dehydrogenase Kinase 1                        | PDK1   |  |          | DisGenet |
| 359<br>4 | Pyruvate Dehydrogenase Kinase 4                        | PDK4   |  | GeneCard | DisGenet |
| 359<br>5 | PDZ And LIM Domain 3                                   | PDLIM3 |  | GeneCard |          |
| 359<br>6 | PDZ And LIM Domain 5                                   | PDLIM5 |  | GeneCard | DisGenet |
| 359<br>7 | PDZ And LIM Domain 7                                   | PDLIM7 |  | GeneCard | DisGenet |
| 359<br>8 | Pyruvate Dehydrogenase Phosphatase Catalytic Subunit 1 | PDP1   |  | GeneCard |          |
| 359<br>9 | 3-Phosphoinositide Dependent Protein Kinase 1          | PDPK1  |  | GeneCard |          |
| 360<br>0 | Podoplanin                                             | PDPN   |  | GeneCard |          |
| 360<br>1 | Decaprenyl Diphosphate Synthase Subunit 2              | PDSS2  |  | GeneCard |          |
| 360<br>2 | Pancreatic And Duodenal Homeobox 1                     | PDX1   |  | GeneCard |          |
| 360<br>3 | Pyridoxal Phosphatase                                  | PDXP   |  | GeneCard |          |
| 360<br>4 | Prodynorphin                                           | PDYN   |  | GeneCard |          |

|          |                                                                                        |          |  |          |          |
|----------|----------------------------------------------------------------------------------------|----------|--|----------|----------|
| 360<br>5 | PDZ Domain Containing 1                                                                | PDZK1    |  | GeneCard | DisGenet |
| 360<br>6 | PDZK1 Interacting Protein 1                                                            | PDZK1IP1 |  | GeneCard |          |
| 360<br>7 | Platelet Endothelial Aggregation Receptor 1                                            | PEAR1    |  | GeneCard |          |
| 360<br>8 | Phosphatidylethanolamine Binding Protein 1                                             | PEBP1    |  | GeneCard | DisGenet |
| 360<br>9 | Phosphatidylethanolamine Binding Protein 1 Pseudogene 2                                | PEBP1P2  |  | GeneCard |          |
| 361<br>0 | Platelet And Endothelial Cell Adhesion Molecule 1                                      | PECAM1   |  | GeneCard | DisGenet |
| 361<br>1 | Plaque Enriched LncRNA In Atherosclerotic And Inflammatory Bowel Macrophage Regulation | PELATON  |  | GeneCard |          |
| 361<br>2 | Phosphatidylethanolamine N-Methyltransferase                                           | PEMT     |  | GeneCard | DisGenet |
| 361<br>3 | Peptidase D                                                                            | PEPD     |  | GeneCard |          |
| 361<br>4 | Peroxisomal Biogenesis Factor 11 Alpha                                                 | PEX11A   |  | GeneCard |          |
| 361<br>5 | Peroxisomal Biogenesis Factor 19                                                       | PEX19    |  | GeneCard |          |
| 361<br>6 | Peroxisomal Biogenesis Factor 3                                                        | PEX3     |  | GeneCard |          |
| 361<br>7 | Peroxisomal Biogenesis Factor 6                                                        | PEX6     |  | GeneCard |          |
| 361<br>8 | Platelet Factor 4                                                                      | PF4      |  | GeneCard | DisGenet |
| 361<br>9 | Platelet Factor 4 Variant 1                                                            | PF4V1    |  | GeneCard |          |
| 362<br>0 | Prefoldin Subunit 1                                                                    | PFDN1    |  | GeneCard |          |
| 362<br>1 | Profilin 1                                                                             | PFN1     |  | GeneCard |          |
| 362<br>2 | Profilin 3                                                                             | PFN3     |  | GeneCard |          |
| 362<br>3 | Progastricsin                                                                          | PGC      |  | GeneCard | DisGenet |
| 362<br>4 | Placental Growth Factor                                                                | PGF      |  | GeneCard | DisGenet |

|          |                                                     |          |      |          |          |
|----------|-----------------------------------------------------|----------|------|----------|----------|
| 362<br>5 | Phosphoglycerate Kinase 1                           | PGK1     |      | GeneCard |          |
| 362<br>6 | Peptidoglycan Recognition Protein 1                 | PGLYRP1  |      | GeneCard |          |
| 362<br>7 | Phosphoglucomutase 1                                | PGM1     |      | GeneCard |          |
| 362<br>8 | Pyroglutamyl-Peptidase I                            | PGPEP1   |      |          | DisGenet |
| 362<br>9 | Progesterone Receptor                               | PGR      |      | GeneCard |          |
| 363<br>0 | PGR antisense RNA 1                                 | PGR-AS1  |      |          | DisGenet |
| 363<br>1 | Progesterone Receptor Membrane Component 1          | PGRMC1   |      | GeneCard |          |
| 363<br>2 | Phosphatase And Actin Regulator 1                   | PHACTR1  |      | GeneCard | DisGenet |
| 363<br>3 | Phosphate Regulating Endopeptidase Homolog X-Linked | PHEX     |      | GeneCard |          |
| 363<br>4 | PHD Finger Protein 14                               | PHF14    |      |          | DisGenet |
| 363<br>5 | Phosphorylase Kinase Regulatory Subunit Alpha 2     | PHKA2    |      | GeneCard |          |
| 363<br>6 | Pleckstrin Homology Like Domain Family A Member 1   | PHLDA1   | OMIM | GeneCard |          |
| 363<br>7 | Phosphoethanolamine/Phosphocholine Phosphatase 1    | PHOSPHO1 |      | GeneCard |          |
| 363<br>8 | Paired like Homeobox 2B                             | PHOX2B   |      |          | DisGenet |
| 363<br>9 | PHD And Ring Finger Domains 1                       | PHRF1    |      | GeneCard |          |
| 364<br>0 | Peptidase Inhibitor 16                              | PI16     |      | GeneCard |          |
| 364<br>1 | Peptidase Inhibitor 3                               | PI3      |      | GeneCard |          |
| 364<br>2 | Protein Inhibitor Of Activated STAT 1               | PIAS1    |      | GeneCard |          |
| 364<br>3 | Protein Inhibitor Of Activated STAT 4               | PIAS4    |      | GeneCard |          |
| 364<br>4 | Phosphotyrosine Interaction Domain Containing 1     | PID1     |      | GeneCard |          |



|          |                                                                          |          |  |          |          |
|----------|--------------------------------------------------------------------------|----------|--|----------|----------|
| 364<br>5 | Piezo Type Mechanosensitive Ion Channel Component 1                      | PIEZO1   |  | GeneCard | DisGenet |
| 364<br>6 | Phosphatidylinositol Glycan Anchor Biosynthesis Class A                  | PIGA     |  | GeneCard |          |
| 364<br>7 | Phosphatidylinositol Glycan Anchor Biosynthesis Class M                  | PIGM     |  | GeneCard |          |
| 364<br>8 | Polymeric Immunoglobulin Receptor                                        | PIGR     |  | GeneCard |          |
| 364<br>9 | Phosphatidylinositol-4-Phosphate 3-Kinase Catalytic Subunit Type 2 Alpha | PIK3C2A  |  | GeneCard |          |
| 365<br>0 | Phosphatidylinositol-4-Phosphate 3-Kinase Catalytic Subunit Type 2 Gamma | PIK3C2G  |  | GeneCard |          |
| 365<br>1 | Phosphatidylinositol-4,5-Bisphosphate 3-Kinase Catalytic Subunit Alpha   | PIK3CA   |  | GeneCard | DisGenet |
| 365<br>2 | Phosphatidylinositol-4,5-Bisphosphate 3-Kinase Catalytic Subunit Beta    | PIK3CB   |  | GeneCard | DisGenet |
| 365<br>3 | Phosphatidylinositol-4,5-Bisphosphate 3-Kinase Catalytic Subunit Delta   | PIK3CD   |  |          | DisGenet |
| 365<br>4 | Phosphatidylinositol-4,5-Bisphosphate 3-Kinase Catalytic Subunit Gamma   | PIK3CG   |  | GeneCard | DisGenet |
| 365<br>5 | Phosphoinositide-3-Kinase Regulatory Subunit 1                           | PIK3R1   |  | GeneCard |          |
| 365<br>6 | Phosphoinositide-3-Kinase Regulatory Subunit 3                           | PIK3R3   |  | GeneCard | DisGenet |
| 365<br>7 | Phosphoinositide-3-Kinase Regulatory Subunit 5                           | PIK3R5   |  |          | DisGenet |
| 365<br>8 | Pim-1 Proto-Oncogene, Serine/Threonine Kinase                            | PIM1     |  | GeneCard |          |
| 365<br>9 | Peptidylprolyl Cis/Trans Isomerase, NIMA-Interacting 1                   | PIN1     |  | GeneCard | DisGenet |
| 366<br>0 | PTEN Induced Kinase 1                                                    | PINK1    |  | GeneCard | DisGenet |
| 366<br>1 | PIN2 (TERF1) Interacting Telomerase Inhibitor 1                          | PINX1    |  | GeneCard | DisGenet |
| 366<br>2 | PINX1 Divergent Transcript                                               | PINX1-DT |  | GeneCard |          |
| 366<br>3 | Prolactin Induced Protein                                                | PIP      |  |          | DisGenet |
| 366<br>4 | Phosphatidylinositol-4-Phosphate 5-Kinase Like 1                         | PIP5KL1  |  | GeneCard |          |

|          |                                                                  |          |  |          |          |
|----------|------------------------------------------------------------------|----------|--|----------|----------|
| 366<br>5 | Piwi-Interacting RNA Cluster 66                                  | PIRC66   |  | GeneCard |          |
| 366<br>6 | Phosphatidylinositol Transfer Protein Alpha                      | PITPNA   |  | GeneCard |          |
| 366<br>7 | Pitrilysin Metallopeptidase 1                                    | PITRM1   |  | GeneCard |          |
| 366<br>8 | Paired Like Homeodomain 1                                        | PITX1    |  | GeneCard |          |
| 366<br>9 | Paired Like Homeodomain 2                                        | PITX2    |  | GeneCard | DisGenet |
| 367<br>0 | Paired Like Homeodomain 3                                        | PITX3    |  |          | DisGenet |
| 367<br>1 | Piwi Like RNA-Mediated Gene Silencing 1                          | PIWIL1   |  | GeneCard |          |
| 367<br>2 | Piwi Like RNA-Mediated Gene Silencing 4                          | PIWIL4   |  | GeneCard |          |
| 367<br>3 | Praja Ring Finger Ubiquitin Ligase 1                             | PJA1     |  | GeneCard |          |
| 367<br>4 | Polycystin 1, Transient Receptor Potential Channel Interacting   | PKD1     |  | GeneCard |          |
| 367<br>5 | Polycystin 2, Transient Receptor Potential Cation Channel        | PKD2     |  | GeneCard |          |
| 367<br>6 | Polycystin 2 Like 1, Transient Receptor Potential Cation Channel | PKD2L1   |  | GeneCard |          |
| 367<br>7 | Pyruvate Kinase M1/2                                             | PKM      |  | GeneCard | DisGenet |
| 367<br>8 | Protein Kinase N1                                                | PKN1     |  | GeneCard |          |
| 367<br>9 | Protein Kinase N2                                                | PKN2     |  | GeneCard |          |
| 368<br>0 | Plakophilin 2                                                    | PKP2     |  | GeneCard |          |
| 368<br>1 | Phospholipase A2 Group X                                         | PLA2G10  |  | GeneCard | DisGenet |
| 368<br>2 | Phospholipase A2 Group X1A                                       | PLA2G12A |  |          | DisGenet |
| 368<br>3 | Phospholipase A2 Group XV                                        | PLA2G15  |  | GeneCard | DisGenet |
| 368<br>4 | Phospholipase A2 Group IB                                        | PLA2G1B  |  | GeneCard | DisGenet |

|          |                                                                          |         |      |          |          |
|----------|--------------------------------------------------------------------------|---------|------|----------|----------|
| 368<br>5 | Phospholipase A2 Group IIA                                               | PLA2G2A |      | GeneCard | DisGenet |
| 368<br>6 | Phospholipase A2 Group IID                                               | PLA2G2D |      | GeneCard | DisGenet |
| 368<br>7 | Phospholipase A2 Group III                                               | PLA2G3  |      | GeneCard | DisGenet |
| 368<br>8 | Phospholipase A2 Group IVA                                               | PLA2G4A | OMIM | GeneCard | DisGenet |
| 368<br>9 | Phospholipase A2 Group IVC                                               | PLA2G4C |      |          | DisGenet |
| 369<br>0 | Phospholipase A2 Group V                                                 | PLA2G5  |      | GeneCard |          |
| 369<br>1 | Phospholipase A2 Group VI                                                | PLA2G6  |      | GeneCard | DisGenet |
| 369<br>2 | Phospholipase A2, group VII (platelet-activating factor acetylhydrolase) | PLA2G7  | OMIM | GeneCard | DisGenet |
| 369<br>3 | Phospholipase A2 Receptor 1                                              | PLA2R1  |      | GeneCard |          |
| 369<br>4 | Phospholipase A and Acyltransferase 1                                    | PLAAT1  |      |          | DisGenet |
| 369<br>5 | PLAG1 Zinc Finger                                                        | PLAG1   |      | GeneCard | DisGenet |
| 369<br>6 | Plasminogen Activator, Tissue Type                                       | PLAT    |      | GeneCard | DisGenet |
| 369<br>7 | Plasminogen Activator, Urokinase                                         | PLAU    | OMIM | GeneCard | DisGenet |
| 369<br>8 | Plasminogen Activator, Urokinase Receptor                                | PLAUR   |      | GeneCard | DisGenet |
| 369<br>9 | Phospholipase B1                                                         | PLB1    |      |          | DisGenet |
| 370<br>0 | Phospholipase C Beta 1                                                   | PLCB1   |      | GeneCard |          |
| 370<br>1 | Phospholipase C Beta 2                                                   | PLCB2   |      | GeneCard |          |
| 370<br>2 | Phospholipase C Beta 3                                                   | PLCB3   | OMIM | GeneCard |          |
| 370<br>3 | Phospholipase C Gamma 1                                                  | PLCG1   |      | GeneCard |          |
| 370<br>4 | Phospholipase C Gamma 2                                                  | PLCG2   |      | GeneCard |          |

|          |                                                   |         |  |          |          |
|----------|---------------------------------------------------|---------|--|----------|----------|
| 370<br>5 | Phospholipase C Eta 1                             | PLCH1   |  | GeneCard |          |
| 370<br>6 | Phospholipase C Like 2                            | PLCL2   |  | GeneCard |          |
| 370<br>7 | Phospholipase D2                                  | PLD2    |  | GeneCard |          |
| 370<br>8 | Phospholipase D Family Member 5                   | PLD5    |  | GeneCard |          |
| 370<br>9 | Plectin                                           | PLEC    |  | GeneCard |          |
| 371<br>0 | Pleckstrin                                        | PLEK    |  | GeneCard |          |
| 371<br>1 | Pleckstrin Homology Domain Containing A1          | PLEKHA1 |  | GeneCard |          |
| 371<br>2 | Pleckstrin Homology And RUN Domain Containing M2  | PLEKHM2 |  | GeneCard |          |
| 371<br>3 | Pleckstrin Homology Domain Containing O1          | PLEKHO1 |  | GeneCard | DisGenet |
| 371<br>4 | Plasminogen                                       | PLG     |  | GeneCard | DisGenet |
| 371<br>5 | Perilipin 1                                       | PLIN1   |  | GeneCard | DisGenet |
| 371<br>6 | Perilipin 2                                       | PLIN2   |  | GeneCard | DisGenet |
| 371<br>7 | Perilipin 3                                       | PLIN3   |  | GeneCard |          |
| 371<br>8 | Perilipin 5                                       | PLIN5   |  |          | DisGenet |
| 371<br>9 | Phospholamban                                     | PLN     |  | GeneCard |          |
| 372<br>0 | Procollagen-Lysine,2-Oxoglutarate 5-Dioxygenase 1 | PLOD1   |  | GeneCard |          |
| 372<br>1 | Proteolipid Protein 1                             | PLP1    |  | GeneCard |          |
| 372<br>2 | Phospholipid Phosphatase 3                        | PLPP3   |  | GeneCard | DisGenet |
| 372<br>3 | Phospholipid Transfer Protein                     | PLTP    |  | GeneCard | DisGenet |
| 372<br>4 | Plexin A2                                         | PLXNA2  |  |          | DisGenet |

|          |                                                    |          |      |          |          |
|----------|----------------------------------------------------|----------|------|----------|----------|
| 372<br>5 | Plexin A4                                          | PLXNA4   |      | GeneCard |          |
| 372<br>6 | Plexin B1                                          | PLXNB1   |      | GeneCard |          |
| 372<br>7 | Plexin B2                                          | PLXNB2   |      | GeneCard |          |
| 372<br>8 | Plexin D1                                          | PLXND1   | OMIM | GeneCard |          |
| 372<br>9 | Prostate Transmembrane Protein, Androgen Induced 1 | PMEPA1   |      | GeneCard |          |
| 373<br>0 | PML Nuclear Body Scaffold                          | PML      |      | GeneCard |          |
| 373<br>1 | Phosphomannomutase 2                               | PMM2     |      | GeneCard |          |
| 373<br>2 | Peptidase, Mitochondrial Processing Subunit Alpha  | PMPCA    |      | GeneCard | DisGenet |
| 373<br>3 | Peptidase, Mitochondrial Processing Subunit Beta   | PMPCB    |      | GeneCard |          |
| 373<br>4 | PMS1 Homolog 2, Mismatch Repair System Component   | PMS2     |      | GeneCard |          |
| 373<br>5 | Phosphomevalonate Kinase                           | PMVK     |      | GeneCard |          |
| 373<br>6 | PNKD metallo-beta-lactamase domain containing      | PNKD     |      |          | DisGenet |
| 373<br>7 | Pancreatic Lipase                                  | PNLIP    |      | GeneCard |          |
| 373<br>8 | Pancreatic Lipase Related Protein 1                | PNLIPRP1 |      | GeneCard |          |
| 373<br>9 | Partner Of NOB1 Homolog                            | PNO1     |      |          | DisGenet |
| 374<br>0 | Purine Nucleoside Phosphorylase                    | PNP      |      |          | DisGenet |
| 374<br>1 | Patatin Like Phospholipase Domain Containing 2     | PNPLA2   |      | GeneCard | DisGenet |
| 374<br>2 | Patatin Like Phospholipase Domain Containing 3     | PNPLA3   |      | GeneCard | DisGenet |
| 374<br>3 | Patatin Like Phospholipase Domain Containing 5     | PNPLA5   |      | GeneCard |          |
| 374<br>4 | Podocan                                            | PODN     |      | GeneCard | DisGenet |

|          |                                                                        |           |      |          |          |
|----------|------------------------------------------------------------------------|-----------|------|----------|----------|
| 374<br>5 | Podocalyxin Like                                                       | PODXL     |      | GeneCard | DisGenet |
| 374<br>6 | POF1B Actin Binding Protein                                            | POF1B     |      | GeneCard |          |
| 374<br>7 | DNA Polymerase Beta                                                    | POLB      |      | GeneCard |          |
| 374<br>8 | DNA Polymerase Delta Interacting Protein 2                             | POLDIP2   |      | GeneCard | DisGenet |
| 374<br>9 | DNA Polymerase Gamma, Catalytic Subunit                                | POLG      |      | GeneCard |          |
| 375<br>0 | DNA Polymerase Gamma 2, Accessory Subunit                              | POLG2     |      | GeneCard |          |
| 375<br>1 | RNA Polymerase I Subunit A                                             | POLR1A    |      | GeneCard |          |
| 375<br>2 | RNA Polymerase I And III Subunit C                                     | POLR1C    |      | GeneCard |          |
| 375<br>3 | RNA Polymerase I Subunit G                                             | POLR1G    |      | GeneCard |          |
| 375<br>4 | RNA Polymerase I Subunit H                                             | POLR1H    |      | GeneCard |          |
| 375<br>5 | RNA Polymerase II Subunit A                                            | POLR2A    |      | GeneCard |          |
| 375<br>6 | RNA Polymerase II Subunit B                                            | POLR2B    |      | GeneCard |          |
| 375<br>7 | RNA Polymerase II Subunit D                                            | POLR2D    |      | GeneCard |          |
| 375<br>8 | RNA Polymerase II, I And III Subunit L                                 | POLR2L    |      | GeneCard |          |
| 375<br>9 | RNA Polymerase III Subunit H                                           | POLR3H    |      | GeneCard |          |
| 376<br>0 | POM121 Transmembrane Nucleoporin Like 3, Pseudogene                    | POM121L3P |      | GeneCard |          |
| 376<br>1 | Proopiomelanocortin                                                    | POMC      |      | GeneCard | DisGenet |
| 376<br>2 | Protein O-Linked Mannose N-Acetylglucosaminyltransferase 2 (Beta 1,4-) | POMGNT2   |      | GeneCard |          |
| 376<br>3 | Paraoxonase-1                                                          | PON1      | OMIM | GeneCard | DisGenet |
| 376<br>4 | Paraoxonase 2                                                          | PON2      |      | GeneCard | DisGenet |

|          |                                                    |          |      |          |          |
|----------|----------------------------------------------------|----------|------|----------|----------|
| 376<br>5 | Paraoxonase-3                                      | PON3     | OMIM | GeneCard | DisGenet |
| 376<br>6 | Cytochrome P450 Oxidoreductase                     | POR      |      | GeneCard |          |
| 376<br>7 | Periostin                                          | POSTN    |      | GeneCard | DisGenet |
| 376<br>8 | Protection Of Telomeres 1                          | POT1     |      |          | DisGenet |
| 376<br>9 | POTE Ankyrin Domain Family Member F                | POTEF    |      |          | DisGenet |
| 377<br>0 | POTE Ankyrin Domain Family Member K, Pseudogene    | POTEKP   |      | GeneCard |          |
| 377<br>1 | POU Class 1 Homeobox 1                             | POU1F1   |      | GeneCard |          |
| 377<br>2 | POU Class 2 Homeobox 1                             | POU2F1   |      | GeneCard | DisGenet |
| 377<br>3 | POU Class 2 Homeobox 3                             | POU2F3   |      | GeneCard | DisGenet |
| 377<br>4 | POU Class 5 Homeobox 1                             | POU5F1   |      | GeneCard |          |
| 377<br>5 | Peroxisome Proliferator Activated Receptor Alpha   | PPARA    |      | GeneCard | DisGenet |
| 377<br>6 | Peroxisome proliferative activated receptor, delta | PPARD    | OMIM | GeneCard | DisGenet |
| 377<br>7 | Peroxisome proliferator activated receptor, gamma  | PPARG    | OMIM | GeneCard | DisGenet |
| 377<br>8 | PPARG Coactivator 1 Alpha                          | PPARGC1A |      | GeneCard | DisGenet |
| 377<br>9 | PPARG Coactivator 1 Beta                           | PPARGC1B |      | GeneCard |          |
| 378<br>0 | Pro-Platelet Basic Protein                         | PPBP     |      | GeneCard | DisGenet |
| 378<br>1 | Phosphopantothenoylcysteine Synthetase             | PPCS     |      | GeneCard |          |
| 378<br>2 | PTPRF Interacting Protein Alpha 2                  | PPFIA2   |      | GeneCard |          |
| 378<br>3 | Peptidylprolyl Isomerase A                         | PPIA     |      | GeneCard | DisGenet |
| 378<br>4 | Peptidylprolyl Isomerase A Like 4A                 | PPIAL4A  |      | GeneCard |          |

|          |                                                                      |          |  |          |          |
|----------|----------------------------------------------------------------------|----------|--|----------|----------|
| 378<br>5 | Peptidylprolyl Isomerase F                                           | PPIF     |  | GeneCard |          |
| 378<br>6 | Peptidylprolyl Isomerase G                                           | PPIG     |  | GeneCard | DisGenet |
| 378<br>7 | Protein Phosphatase, Mg <sup>2+</sup> /Mn <sup>2+</sup> Dependent 1A | PPM1A    |  | GeneCard |          |
| 378<br>8 | Protein Phosphatase, Mg <sup>2+</sup> /Mn <sup>2+</sup> Dependent 1B | PPM1B    |  | GeneCard |          |
| 378<br>9 | Protein Phosphatase, Mg <sup>2+</sup> /Mn <sup>2+</sup> Dependent 1D | PPM1D    |  |          | DisGenet |
| 379<br>0 | Protein Phosphatase, Mg <sup>2+</sup> /Mn <sup>2+</sup> Dependent 1K | PPM1K    |  | GeneCard |          |
| 379<br>1 | Protein Phosphatase 1 Catalytic Subunit Gamma                        | PPP1CC   |  | GeneCard |          |
| 379<br>2 | Protein Phosphatase 1 Regulatory Inhibitor Subunit 11                | PPP1R11  |  | GeneCard |          |
| 379<br>3 | Protein Phosphatase 1 Regulatory Subunit 12A                         | PPP1R12A |  | GeneCard |          |
| 379<br>4 | Protein Phosphatase 1 Regulatory Subunit 12B                         | PPP1R12B |  | GeneCard |          |
| 379<br>5 | Protein Phosphatase 1 Regulatory Subunit 12C                         | PPP1R12C |  | GeneCard |          |
| 379<br>6 | Protein Phosphatase 1 Regulatory Subunit 13 Like                     | PPP1R13L |  | GeneCard |          |
| 379<br>7 | Protein Phosphatase 1 Regulatory Subunit 15A                         | PPP1R15A |  | GeneCard |          |
| 379<br>8 | Protein Phosphatase 1 Regulatory Subunit 17                          | PPP1R17  |  | GeneCard |          |
| 379<br>9 | Protein Phosphatase 1 Regulatory Inhibitor Subunit 1A                | PPP1R1A  |  | GeneCard | DisGenet |
| 380<br>0 | Protein Phosphatase 1 Regulatory Subunit 3A                          | PPP1R3A  |  | GeneCard |          |
| 380<br>1 | Protein Phosphatase 1 Regulatory Subunit 3B                          | PPP1R3B  |  | GeneCard | DisGenet |
| 380<br>2 | Protein Phosphatase 2 Catalytic Subunit Beta                         | PPP2CB   |  | GeneCard |          |
| 380<br>3 | Protein Phosphatase 2 Regulatory Subunit B, Alpha                    | PPP2R2A  |  |          | DisGenet |
| 380<br>4 | Protein Phosphatase 3 Regulatory Subunit B, Alpha                    | PPP3R1   |  | GeneCard |          |



|          |                                                           |          |      |          |          |
|----------|-----------------------------------------------------------|----------|------|----------|----------|
| 380<br>5 | Palmitoyl-Protein Thioesterase 2                          | PPT2     |      | GeneCard |          |
| 380<br>6 | Proline Rich Acidic Protein 1                             | PRAP1    |      |          | DisGenet |
| 380<br>7 | PR/SET Domain 1                                           | PRDM1    |      | GeneCard | DisGenet |
| 380<br>8 | PR/SET Domain 16                                          | PRDM16   |      | GeneCard |          |
| 380<br>9 | PR/SET Domain 9                                           | PRDM9    |      | GeneCard |          |
| 381<br>0 | Peroxiredoxin 1                                           | PRDX1    | OMIM | GeneCard | DisGenet |
| 381<br>1 | Peroxiredoxin 4                                           | PRDX4    |      | GeneCard | DisGenet |
| 381<br>2 | Peroxiredoxin 5                                           | PRDX5    |      | GeneCard |          |
| 381<br>3 | Peroxiredoxin 6                                           | PRDX6    |      | GeneCard |          |
| 381<br>4 | PRELI Domain Containing 1                                 | PRELID1  |      | GeneCard |          |
| 381<br>5 | Prolyl Endopeptidase                                      | PREP     |      |          | DisGenet |
| 381<br>6 | Prolyl Endopeptidase Like                                 | PREPL    |      | GeneCard |          |
| 381<br>7 | Perforin 1                                                | PRF1     |      | GeneCard |          |
| 381<br>8 | Proteoglycan 4                                            | PRG4     |      | GeneCard | DisGenet |
| 381<br>9 | Prickle Planar Cell Polarity Protein 1                    | PRICKLE1 |      | GeneCard |          |
| 382<br>0 | Prickle Planar Cell Polarity Protein 2                    | PRICKLE2 |      | GeneCard |          |
| 382<br>1 | Protein Kinase AMP-Activated Catalytic Subunit Alpha 1    | PRKAA1   |      | GeneCard | DisGenet |
| 382<br>2 | Protein Kinase AMP-Activated Catalytic Subunit Alpha 2    | PRKAA2   |      | GeneCard | DisGenet |
| 382<br>3 | Protein Kinase AMP-Activated Non-Catalytic Subunit Beta 1 | PRKAB1   |      | GeneCard | DisGenet |
| 382<br>4 | Protein Kinase AMP-Activated Non-Catalytic Subunit Beta 2 | PRKAB2   |      | GeneCard |          |

|          |                                                               |         |  |          |          |
|----------|---------------------------------------------------------------|---------|--|----------|----------|
| 382<br>5 | Protein Kinase AMP-Activated Non-Catalytic Subunit Gamma 1    | PRKAG1  |  | GeneCard |          |
| 382<br>6 | Protein Kinase AMP-Activated Non-Catalytic Subunit Gamma 2    | PRKAG2  |  | GeneCard |          |
| 382<br>7 | Protein Kinase AMP-Activated Non-Catalytic Subunit Gamma 3    | PRKAG3  |  | GeneCard |          |
| 382<br>8 | Protein Kinase CAMP-Dependent Type I Regulatory Subunit Alpha | PRKAR1A |  | GeneCard | DisGenet |
| 382<br>9 | Protein Kinase C Alpha                                        | PRKCA   |  | GeneCard | DisGenet |
| 383<br>0 | Protein Kinase C Beta                                         | PRKCB   |  | GeneCard | DisGenet |
| 383<br>1 | Protein Kinase C Delta                                        | PRKCD   |  | GeneCard |          |
| 383<br>2 | Protein Kinase C Epsilon                                      | PRKCE   |  | GeneCard |          |
| 383<br>3 | Protein Kinase C Gamma                                        | PRKCG   |  | GeneCard |          |
| 383<br>4 | Protein Kinase C Eta                                          | PRKCH   |  | GeneCard |          |
| 383<br>5 | Protein Kinase C Iota                                         | PRKCI   |  | GeneCard |          |
| 383<br>6 | Protein Kinase C Zeta                                         | PRKCZ   |  | GeneCard |          |
| 383<br>7 | Protein Kinase D1                                             | PRKD1   |  | GeneCard |          |
| 383<br>8 | Protein Kinase D2                                             | PRKD2   |  | GeneCard |          |
| 383<br>9 | Protein Kinase, DNA-Activated, Catalytic Subunit              | PRKDC   |  | GeneCard |          |
| 384<br>0 | Protein Kinase CGMP-Dependent 1                               | PRKG1   |  | GeneCard |          |
| 384<br>1 | Protein Kinase CGMP-Dependent 2                               | PRKG2   |  | GeneCard |          |
| 384<br>2 | Parkin RBR E3 Ubiquitin Protein Ligase                        | PRKN    |  | GeneCard |          |
| 384<br>3 | Prolactin                                                     | PRL     |  | GeneCard | DisGenet |
| 384<br>4 | Prolactin Receptor                                            | PRLR    |  | GeneCard |          |

|          |                                                            |         |  |          |          |
|----------|------------------------------------------------------------|---------|--|----------|----------|
| 384<br>5 | Protein Arginine Methyltransferase 1                       | PRMT1   |  | GeneCard |          |
| 384<br>6 | Protein Arginine Methyltransferase 3                       | PRMT3   |  | GeneCard | DisGenet |
| 384<br>7 | Protein Arginine Methyltransferase 5 Pseudogene 1          | PRMT5P1 |  | GeneCard |          |
| 384<br>8 | Protein Arginine Methyltransferase 7                       | PRMT7   |  | GeneCard |          |
| 384<br>9 | Prion Protein                                              | PRNP    |  | GeneCard | DisGenet |
| 385<br>0 | Protein C, Inactivator Of Coagulation Factors Va And VIIIa | PROC    |  | GeneCard | DisGenet |
| 385<br>1 | Protein C Receptor                                         | PROCR   |  | GeneCard | DisGenet |
| 385<br>2 | Proline Dehydrogenase 1                                    | PRODH   |  | GeneCard |          |
| 385<br>3 | Prominin 1                                                 | PROM1   |  | GeneCard |          |
| 385<br>4 | Protein S                                                  | PROS1   |  | GeneCard | DisGenet |
| 385<br>5 | Prospero Homeobox 1                                        | PROX1   |  |          | DisGenet |
| 385<br>6 | Protein Z, Vitamin K Dependent Plasma Glycoprotein         | PROZ    |  | GeneCard |          |
| 385<br>7 | Pre-mRNA Processing Factor 8                               | PRPF8   |  | GeneCard |          |
| 385<br>8 | Phosphoribosyl Pyrophosphate Synthetase 1                  | PRPS1   |  | GeneCard |          |
| 385<br>9 | Proline Rich 7, Synaptic                                   | PRR7    |  | GeneCard |          |
| 386<br>0 | Paired Related Homeobox 1                                  | PRRX1   |  | GeneCard | DisGenet |
| 386<br>1 | Serine Protease 1                                          | PRSS1   |  | GeneCard |          |
| 386<br>2 | Serine Protease 2                                          | PRSS2   |  | GeneCard |          |
| 386<br>3 | Serine Protease 33                                         | PRSS33  |  | GeneCard |          |
| 386<br>4 | Serine Protease 55                                         | PRSS55  |  |          | DisGenet |

|          |                                                  |         |  |          |          |
|----------|--------------------------------------------------|---------|--|----------|----------|
| 386<br>5 | Phosphoribosyl Transferase Domain Containing 1   | PRTFDC1 |  | GeneCard |          |
| 386<br>6 | Proteinase 3                                     | PRTN3   |  | GeneCard | DisGenet |
| 386<br>7 | Prosaposin                                       | PSAP    |  | GeneCard |          |
| 386<br>8 | Phosphoserine Aminotransferase 1                 | PSAT1   |  |          | DisGenet |
| 386<br>9 | Presenilin 1                                     | PSEN1   |  | GeneCard |          |
| 387<br>0 | Presenilin 2                                     | PSEN2   |  | GeneCard |          |
| 387<br>1 | Pregnancy Specific Beta-1-Glycoprotein 1         | PSG1    |  | GeneCard |          |
| 387<br>2 | Pregnancy Specific Beta-1-Glycoprotein 2         | PSG2    |  | GeneCard |          |
| 387<br>3 | PC4 And SFRS1 Interacting Protein 1 Pseudogene 1 | PSIP1P1 |  | GeneCard |          |
| 387<br>4 | Proteasome 20S Subunit Alpha 6                   | PSMA6   |  | GeneCard | DisGenet |
| 387<br>5 | Proteasome 20S Subunit Beta 8                    | PSMB8   |  | GeneCard | DisGenet |
| 387<br>6 | Proteasome 20S Subunit Beta 9                    | PSMB9   |  | GeneCard |          |
| 387<br>7 | PSMC3 Interacting Protein                        | PSMC3IP |  | GeneCard |          |
| 387<br>8 | Proteasome 26S Subunit, ATPase 5                 | PSMC5   |  | GeneCard | DisGenet |
| 387<br>9 | Proteasome 26S Subunit, ATPase 6                 | PSMC6   |  | GeneCard |          |
| 388<br>0 | Proteasome 26S Subunit, Non-ATPase 6             | PSMD6   |  | GeneCard |          |
| 388<br>1 | Proteasome 26S Subunit, Non-ATPase 7             | PSMD7   |  |          | DisGenet |
| 388<br>2 | Proteasome 26S Subunit, Non-ATPase 9             | PSMD9   |  | GeneCard | DisGenet |
| 388<br>3 | Proteasome Activator Subunit 3                   | PSME3   |  | GeneCard | DisGenet |
| 388<br>4 | Proline And Serine Rich Coiled-Coil 1            | PSRC1   |  | GeneCard | DisGenet |

|          |                                                            |         |      |          |          |
|----------|------------------------------------------------------------|---------|------|----------|----------|
| 388<br>5 | Potocki-Shaffer Syndrome                                   | PSS     |      |          | DisGenet |
| 388<br>6 | Proline-Serine-Threonine Phosphatase Interacting Protein 2 | PSTPIP2 |      |          | DisGenet |
| 388<br>7 | Platelet Activating Factor Receptor                        | PTAFR   |      | GeneCard | DisGenet |
| 388<br>8 | Polypyrimidine Tract Binding Protein 1                     | PTBP1   |      |          | DisGenet |
| 388<br>9 | Patched 1                                                  | PTCH1   |      | GeneCard |          |
| 389<br>0 | Papillary Thyroid Carcinoma Susceptibility Candidate 3     | PTCSC3  |      | GeneCard |          |
| 389<br>1 | Phosphatase And Tensin Homolog                             | PTEN    |      | GeneCard | DisGenet |
| 389<br>2 | Prostaglandin D2 Receptor                                  | PTGDR   |      | GeneCard |          |
| 389<br>3 | Prostaglandin D2 Synthase                                  | PTGDS   | OMIM | GeneCard | DisGenet |
| 389<br>4 | Prostaglandin E Receptor 1                                 | PTGER1  |      | GeneCard |          |
| 389<br>5 | Prostaglandin E Receptor 2                                 | PTGER2  |      | GeneCard |          |
| 389<br>6 | Prostaglandin E Receptor 3                                 | PTGER3  |      | GeneCard | DisGenet |
| 389<br>7 | Prostaglandin E Receptor 4                                 | PTGER4  |      | GeneCard | DisGenet |
| 389<br>8 | Prostaglandin E Synthase                                   | PTGES   |      | GeneCard | DisGenet |
| 389<br>9 | Prostaglandin E Synthase 2                                 | PTGES2  |      | GeneCard |          |
| 390<br>0 | Prostaglandin E Synthase 3                                 | PTGES3  |      | GeneCard |          |
| 390<br>1 | Prostaglandin I2 Receptor                                  | PTGIR   |      | GeneCard | DisGenet |
| 390<br>2 | Prostaglandin I2 Synthase                                  | PTGIS   |      | GeneCard | DisGenet |
| 390<br>3 | Prostaglandin Reductase 1                                  | PTGR1   |      | GeneCard |          |
| 390<br>4 | Prostaglandin-Endoperoxide Synthase 1                      | PTGS1   |      | GeneCard | DisGenet |

|          |                                                   |        |  |          |          |
|----------|---------------------------------------------------|--------|--|----------|----------|
| 390<br>5 | Prostaglandin-Endoperoxide Synthase 2             | PTGS2  |  | GeneCard | DisGenet |
| 390<br>6 | Parathyroid Hormone                               | PTH    |  | GeneCard | DisGenet |
| 390<br>7 | Parathyroid Hormone 1 Receptor                    | PTH1R  |  | GeneCard |          |
| 390<br>8 | Parathyroid Hormone 2 Receptor                    | PTH2R  |  | GeneCard |          |
| 390<br>9 | Parathyroid Hormone Like Hormone                  | PTHLH  |  | GeneCard | DisGenet |
| 391<br>0 | Protein Tyrosine Kinase 2                         | PTK2   |  | GeneCard |          |
| 391<br>1 | Protein Tyrosine Kinase 2 Beta                    | PTK2B  |  | GeneCard | DisGenet |
| 391<br>2 | Pleiotrophin                                      | PTN    |  | GeneCard | DisGenet |
| 391<br>3 | PTOV1 Extended AT-Hook Containing Adaptor Protein | PTOV1  |  | GeneCard | DisGenet |
| 391<br>4 | Protein Phosphatase 2 Phosphatase Activator       | PTPA   |  | GeneCard | DisGenet |
| 391<br>5 | Protein Tyrosine Phosphatase Non-Receptor Type 1  | PTPN1  |  | GeneCard | DisGenet |
| 391<br>6 | Protein Tyrosine Phosphatase Non-Receptor Type 11 | PTPN11 |  | GeneCard | DisGenet |
| 391<br>7 | Protein Tyrosine Phosphatase Non-Receptor Type 2  | PTPN2  |  | GeneCard | DisGenet |
| 391<br>8 | Protein Tyrosine Phosphatase Non-Receptor Type 22 | PTPN22 |  | GeneCard | DisGenet |
| 391<br>9 | Protein Tyrosine Phosphatase Non-Receptor Type 3  | PTPN3  |  | GeneCard |          |
| 392<br>0 | Protein Tyrosine Phosphatase Non-Receptor Type 6  | PTPN6  |  | GeneCard | DisGenet |
| 392<br>1 | Protein Tyrosine Phosphatase Receptor Type A      | PTPRA  |  | GeneCard |          |
| 392<br>2 | Protein Tyrosine Phosphatase Receptor Type C      | PTPRC  |  | GeneCard |          |
| 392<br>3 | Protein Tyrosine Phosphatase Receptor Type D      | PTPRD  |  | GeneCard |          |
| 392<br>4 | Protein Tyrosine Phosphatase Receptor Type E      | PTPRE  |  | GeneCard |          |

|          |                                                     |        |  |          |          |
|----------|-----------------------------------------------------|--------|--|----------|----------|
| 392<br>5 | Protein Tyrosine Phosphatase Receptor Type F        | PTPRF  |  | GeneCard | DisGenet |
| 392<br>6 | Protein Tyrosine Phosphatase Receptor Type N2       | PTPRN2 |  | GeneCard |          |
| 392<br>7 | 6-Pyruvoyltetrahydropterin Synthase                 | PTS    |  | GeneCard |          |
| 392<br>8 | Pituitary Tumor-Transforming 2                      | PTTG2  |  | GeneCard |          |
| 392<br>9 | Pentraxin 3                                         | PTX3   |  | GeneCard | DisGenet |
| 393<br>0 | P53 Upregulated Regulator Of P53 Levels             | PURPL  |  | GeneCard |          |
| 393<br>1 | PVR Cell Adhesion Molecule                          | PVR    |  |          | DisGenet |
| 393<br>2 | Pvt1 Oncogene                                       | PVT1   |  | GeneCard |          |
| 393<br>3 | Prader Willi/Angelman region RNA 1                  | PWAR1  |  |          | DisGenet |
| 393<br>4 | Peroxidasin                                         | PXDN   |  | GeneCard |          |
| 393<br>5 | PX Domain Containing Serine/Threonine Kinase Like   | PXK    |  | GeneCard |          |
| 393<br>6 | Paxillin                                            | PXN    |  | GeneCard |          |
| 393<br>7 | PYD And CARD Domain Containing                      | PYCARD |  | GeneCard | DisGenet |
| 393<br>8 | Glycogen Phosphorylase B                            | PYGB   |  | GeneCard |          |
| 393<br>9 | Glycogen Phosphorylase, Muscle Associated           | PYGM   |  | GeneCard |          |
| 394<br>0 | Peptide YY                                          | PYY    |  | GeneCard |          |
| 394<br>1 | QKI, KH Domain Containing RNA Binding               | QKI    |  | GeneCard |          |
| 394<br>2 | GlutaminyI-TRNA Amidotransferase Subunit QRSL1      | QRSL1  |  | GeneCard |          |
| 394<br>3 | Quiescin Sulfhydryl Oxidase 1                       | QSOX1  |  | GeneCard |          |
| 394<br>4 | Queuine TRNA-Ribosyltransferase Catalytic Subunit 1 | QTRT1  |  | GeneCard |          |

|          |                                                            |              |  |          |          |
|----------|------------------------------------------------------------|--------------|--|----------|----------|
| 394<br>5 | RAB20, Member RAS Oncogene Family                          | RAB20        |  | GeneCard |          |
| 394<br>6 | RAB22A, Member RAS Oncogene Family                         | RAB22A       |  | GeneCard |          |
| 394<br>7 | RAB5A, Member RAS Oncogene Family                          | RAB5A        |  | GeneCard |          |
| 394<br>8 | RAB7A, Member RAS Oncogene Family                          | RAB7A        |  | GeneCard |          |
| 394<br>9 | RAB9 Effector Protein with Kelch Motifs                    | RABEPK       |  |          | DisGenet |
| 395<br>0 | Rac Family Small GTPase 1                                  | RAC1         |  | GeneCard | DisGenet |
| 395<br>1 | Rac Family Small GTPase 2                                  | RAC2         |  | GeneCard | DisGenet |
| 395<br>2 | Receptor For Activated C Kinase 1                          | RACK1        |  | GeneCard |          |
| 395<br>3 | RAD21 Cohesin Complex Component                            | RAD21        |  | GeneCard |          |
| 395<br>4 | RAD51 Recombinase                                          | RAD51        |  | GeneCard |          |
| 395<br>5 | RAD51 Associated Protein 1                                 | RAD51AP1     |  | GeneCard |          |
| 395<br>6 | RAD51 Paralog C                                            | RAD51C       |  | GeneCard |          |
| 395<br>7 | RAD51 Paralog D                                            | RAD51D       |  | GeneCard |          |
| 395<br>8 | RAD51L3-RFFL Readthrough                                   | RAD51L3-RFFL |  | GeneCard |          |
| 395<br>9 | RAD52 Homolog, DNA Repair Protein                          | RAD52        |  | GeneCard |          |
| 396<br>0 | RAD54 Like                                                 | RAD54L       |  | GeneCard |          |
| 396<br>1 | RPA1 Related Single Stranded DNA Binding Protein, X-Linked | RADX         |  | GeneCard |          |
| 396<br>2 | Retinoic Acid Early Transcript 1E                          | RAET1E       |  | GeneCard |          |
| 396<br>3 | Raf-1 Proto-Oncogene, Serine/Threonine Kinase              | RAF1         |  | GeneCard |          |
| 396<br>4 | Recombination Activating 1                                 | RAG1         |  |          | DisGenet |



|          |                                                            |         |  |          |          |
|----------|------------------------------------------------------------|---------|--|----------|----------|
| 396<br>5 | Recombination Activating 2                                 | RAG2    |  |          | DisGenet |
| 396<br>6 | RAS Like Proto-Oncogene A                                  | RALA    |  | GeneCard |          |
| 396<br>7 | RalA Binding Protein 1                                     | RALBP1  |  | GeneCard |          |
| 396<br>8 | RALY RNA Binding Protein Like                              | RALYL   |  | GeneCard |          |
| 396<br>9 | Receptor Activity Modifying Protein 3                      | RAMP3   |  | GeneCard |          |
| 397<br>0 | RAN, Member RAS Oncogene Family                            | RAN     |  | GeneCard |          |
| 397<br>1 | RAP1A, Member Of RAS Oncogene Family                       | RAP1A   |  | GeneCard |          |
| 397<br>2 | RAP1B, Member Of RAS Oncogene Family                       | RAP1B   |  | GeneCard |          |
| 397<br>3 | RAP2A, Member Of RAS Oncogene Family                       | RAP2A   |  | GeneCard |          |
| 397<br>4 | Rap Guanine Nucleotide Exchange Factor 3                   | RAPGEF3 |  | GeneCard |          |
| 397<br>5 | Rap Guanine Nucleotide Exchange Factor 5                   | RAPGEF5 |  | GeneCard |          |
| 397<br>6 | Retinoic Acid Receptor Alpha                               | RARA    |  | GeneCard | DisGenet |
| 397<br>7 | Retinoic Acid Receptor Beta                                | RARB    |  | GeneCard | DisGenet |
| 397<br>8 | Retinoic Acid Receptor Gamma                               | RARG    |  | GeneCard |          |
| 397<br>9 | Retinoic Acid Receptor Responder 1                         | RARRES1 |  | GeneCard |          |
| 398<br>0 | Retinoic Acid Receptor Responder 2                         | RARRES2 |  | GeneCard | DisGenet |
| 398<br>1 | Arginyl-TRNA Synthetase 1                                  | RARS1   |  | GeneCard |          |
| 398<br>2 | Arginyl-TRNA Synthetase 2, Mitochondrial                   | RARS2   |  | GeneCard |          |
| 398<br>3 | RAS P21 Protein Activator 1                                | RASA1   |  | GeneCard | DisGenet |
| 398<br>4 | RAS Protein Specific Guanine Nucleotide Releasing Factor 1 | RASGRF1 |  |          | DisGenet |

|          |                                                         |         |  |          |          |
|----------|---------------------------------------------------------|---------|--|----------|----------|
| 398<br>5 | RAS Guanyl Releasing Protein 1                          | RASGRP1 |  | GeneCard |          |
| 398<br>6 | RAS Guanyl Releasing Protein 3                          | RASGRP3 |  | GeneCard |          |
| 398<br>7 | RB Transcriptional Corepressor 1                        | RB1     |  | GeneCard |          |
| 398<br>8 | RB Binding Protein 4, Chromatin Remodeling Factor       | RBBP4   |  | GeneCard |          |
| 398<br>9 | RB Binding Protein 7, Chromatin Remodeling Factor       | RBBP7   |  | GeneCard |          |
| 399<br>0 | RANBP2-Type And C3HC4-Type Zinc Finger Containing 1     | RBCK1   |  | GeneCard |          |
| 399<br>1 | RNA Binding Fox-1 Homolog 1                             | RBFOX1  |  | GeneCard |          |
| 399<br>2 | RB Transcriptional Corepressor Like 1                   | RBL1    |  | GeneCard |          |
| 399<br>3 | RB Transcriptional Corepressor Like 2                   | RBL2    |  | GeneCard |          |
| 399<br>4 | RNA Binding Motif Protein 20                            | RBM20   |  | GeneCard |          |
| 399<br>5 | RNA Binding Motif Single Stranded Interacting Protein 3 | RBMS3   |  |          | DisGenet |
| 399<br>6 | RNA Binding Motif Protein Y-Linked Family 1 Member A1   | RBMY1A1 |  | GeneCard |          |
| 399<br>7 | Retinol Binding Protein 4                               | RBP4    |  | GeneCard | DisGenet |
| 399<br>8 | Ring-Box 1                                              | RBX1    |  | GeneCard |          |
| 399<br>9 | Regulator Of Calcineurin 1                              | RCAN1   |  | GeneCard | DisGenet |
| 400<br>0 | RCC1 And BTB Domain Containing Protein 1                | RCBTB1  |  | GeneCard | DisGenet |
| 400<br>1 | RAS Converting CAAX Endopeptidase 1                     | RCE1    |  |          | DisGenet |
| 400<br>2 | Reticulocalbin 2                                        | RCN2    |  | GeneCard | DisGenet |
| 400<br>3 | Reticulocalbin 3                                        | RCN3    |  | GeneCard |          |
| 400<br>4 | REC8 Meiotic Recombination Protein                      | REC8    |  | GeneCard |          |

|          |                                                            |         |  |          |          |
|----------|------------------------------------------------------------|---------|--|----------|----------|
| 400<br>5 | Reversion Inducing Cysteine Rich Protein With Kazal Motifs | RECK    |  | GeneCard |          |
| 400<br>6 | RecQ Like Helicase                                         | RECQL   |  | GeneCard |          |
| 400<br>7 | RecQ Like Helicase 4                                       | RECQL4  |  | GeneCard |          |
| 400<br>8 | RecQ Like Helicase 5                                       | RECQL5  |  | GeneCard |          |
| 400<br>9 | Regenerating Family Member 1 Alpha                         | REG1A   |  |          | DisGenet |
| 401<br>0 | RELA Proto-Oncogene, NF-KB Subunit                         | RELA    |  | GeneCard | DisGenet |
| 401<br>1 | RELB Proto-Oncogene, NF-KB Subunit                         | RELB    |  | GeneCard |          |
| 401<br>2 | Reelin                                                     | RELN    |  | GeneCard | DisGenet |
| 401<br>3 | Renin                                                      | REN     |  | GeneCard | DisGenet |
| 401<br>4 | Renin Binding Protein                                      | RENBP   |  |          | DisGenet |
| 401<br>5 | RE1 Silencing Transcription Factor                         | REST    |  | GeneCard |          |
| 401<br>6 | Ret Proto-Oncogene                                         | RET     |  | GeneCard |          |
| 401<br>7 | Resistin                                                   | RETN    |  | GeneCard | DisGenet |
| 401<br>8 | Resistin Like Beta                                         | RETNLB  |  | GeneCard | DisGenet |
| 401<br>9 | Reticulophagy Regulator 1                                  | RETREG1 |  | GeneCard |          |
| 402<br>0 | Replication Factor C Subunit 1                             | RFC1    |  |          | DisGenet |
| 402<br>1 | Replication Factor C Subunit 2                             | RFC2    |  |          | DisGenet |
| 402<br>2 | Replication Factor C Subunit 4                             | RFC4    |  | GeneCard |          |
| 402<br>3 | Ret Finger Protein Like 1                                  | RFPL1   |  | GeneCard |          |
| 402<br>4 | Ret Finger Protein Like 4A                                 | RFPL4A  |  | GeneCard |          |

|          |                                                    |        |  |          |          |
|----------|----------------------------------------------------|--------|--|----------|----------|
| 402<br>5 | RFT1 Homolog                                       | RFT1   |  | GeneCard |          |
| 402<br>6 | Regulatory Factor X1                               | RFX1   |  |          | DisGenet |
| 402<br>7 | Regulatory Factor X5                               | RFX5   |  | GeneCard | DisGenet |
| 402<br>8 | Regulator Of Cell Cycle                            | RGCC   |  | GeneCard | DisGenet |
| 402<br>9 | Regulator Of G Protein Signaling 1                 | RGS1   |  | GeneCard | DisGenet |
| 403<br>0 | Regulator Of G Protein Signaling 14                | RGS14  |  | GeneCard |          |
| 403<br>1 | Regulator Of G Protein Signaling 16                | RGS16  |  | GeneCard |          |
| 403<br>2 | Regulator Of G Protein Signaling 2                 | RGS2   |  | GeneCard | DisGenet |
| 403<br>3 | Regulator Of G Protein Signaling 3                 | RGS3   |  | GeneCard | DisGenet |
| 403<br>4 | Regulator Of G Protein Signaling 4                 | RGS4   |  | GeneCard |          |
| 403<br>5 | Regulator Of G Protein Signaling 5                 | RGS5   |  | GeneCard | DisGenet |
| 403<br>6 | Regulator Of G Protein Signaling 6                 | RGS6   |  | GeneCard |          |
| 403<br>7 | Regulator Of G Protein Signaling 7                 | RGS7   |  |          | DisGenet |
| 403<br>8 | Regulator Of G Protein Signaling 9                 | RGS9   |  | GeneCard |          |
| 403<br>9 | Regulator Of G Protein Signaling 9 Binding Protein | RGS9BP |  | GeneCard |          |
| 404<br>0 | Rh Associated Glycoprotein                         | RHAG   |  | GeneCard |          |
| 404<br>1 | Rhomoid 5 Homolog 2                                | RHBDF2 |  | GeneCard | DisGenet |
| 404<br>2 | RHEB Pseudogene 1                                  | RHEBP1 |  |          | DisGenet |
| 404<br>3 | Rhodopsin                                          | RHO    |  | GeneCard |          |
| 404<br>4 | Ras Homolog Family Member A                        | RHOA   |  | GeneCard | DisGenet |

|          |                                                                |           |  |          |          |
|----------|----------------------------------------------------------------|-----------|--|----------|----------|
| 404<br>5 | Ras Homolog Family Member B                                    | RHOB      |  | GeneCard |          |
| 404<br>6 | Rho Related BTB Domain Containing 3                            | RHOBTB3   |  | GeneCard |          |
| 404<br>7 | Ras Homolog Family Member D                                    | RHOD      |  | GeneCard |          |
| 404<br>8 | Ras Homolog Family Member G                                    | RHOG      |  | GeneCard |          |
| 404<br>9 | Ras Homolog Family Member H                                    | RHOH      |  | GeneCard |          |
| 405<br>0 | RPTOR Independent Companion Of MTOR Complex 2                  | RICTOR    |  | GeneCard |          |
| 405<br>1 | Receptor Interacting Serine/Threonine Kinase 1                 | RIPK1     |  | GeneCard |          |
| 405<br>2 | Receptor Interacting Serine/Threonine Kinase 2                 | RIPK2     |  | GeneCard | DisGenet |
| 405<br>3 | Receptor Interacting Serine/Threonine Kinase 3                 | RIPK3     |  | GeneCard | DisGenet |
| 405<br>4 | Ras Like Without CAAX 2                                        | RIT2      |  | GeneCard |          |
| 405<br>5 | Retinaldehyde Binding Protein 1                                | RLBP1     |  | GeneCard |          |
| 405<br>6 | Relaxin 2                                                      | RLN2      |  | GeneCard | DisGenet |
| 405<br>7 | Regulator Of MON1-CCZ1                                         | RMC1      |  |          | DisGenet |
| 405<br>8 | RNA Component Of Mitochondrial RNA Processing Endoribonuclease | RMRP      |  | GeneCard |          |
| 405<br>9 | Rhabdomyosarcoma 2 Associated Transcript                       | RMST      |  | GeneCard |          |
| 406<br>0 | RNA, 7SL, Cytoplasmic 263, Pseudogene                          | RN7SL263P |  |          | DisGenet |
| 406<br>1 | Ribonuclease A Family Member 1, Pancreatic                     | RNASE1    |  |          | DisGenet |
| 406<br>2 | Ribonuclease A Family Member 3                                 | RNASE3    |  | GeneCard | DisGenet |
| 406<br>3 | Ring Finger Protein 111                                        | RNF111    |  | GeneCard |          |
| 406<br>4 | Ring Finger Protein 113B                                       | RNF113B   |  | GeneCard |          |

|          |                                                          |           |  |          |          |
|----------|----------------------------------------------------------|-----------|--|----------|----------|
| 406<br>5 | Ring Finger Protein 157                                  | RNF157    |  | GeneCard |          |
| 406<br>6 | Ring Finger Protein 168                                  | RNF168    |  | GeneCard |          |
| 406<br>7 | Ring Finger Protein 19A, RBR E3 ubiquitin protein ligase | RNF19A    |  |          | DisGenet |
| 406<br>8 | Ring Finger Protein 213                                  | RNF213    |  | GeneCard | DisGenet |
| 406<br>9 | Ring Finger Protein 39                                   | RNF39     |  | GeneCard |          |
| 407<br>0 | Renalase, FAD Dependent Amine Oxidase                    | RNLS      |  | GeneCard |          |
| 407<br>1 | RNA Binding Region (RNP1, RRM) Containing 3              | RNPC3     |  | GeneCard |          |
| 407<br>2 | s-rRNA                                                   | RNR1      |  |          | DisGenet |
| 407<br>3 | l-rRNA                                                   | RNR2      |  |          | DisGenet |
| 407<br>4 | RNA, U1 Small Nuclear 1                                  | RNU1-1    |  |          | DisGenet |
| 407<br>5 | RNA, U6 Small Nuclear 392, pseudogene                    | RNU6-392P |  |          | DisGenet |
| 407<br>6 | RNA, U7 Small Nuclear 51 Pseudogene                      | RNU7-51P  |  | GeneCard |          |
| 407<br>7 | Ro60, Y RNA Binding Protein                              | RO60      |  | GeneCard |          |
| 407<br>8 | Roundabout Guidance Receptor 2                           | ROBO2     |  | GeneCard |          |
| 407<br>9 | Roundabout Guidance Receptor 3                           | ROBO3     |  |          | DisGenet |
| 408<br>0 | Roundabout Guidance Receptor 4                           | ROBO4     |  | GeneCard |          |
| 408<br>1 | Rho Associated Coiled-Coil Containing Protein Kinase 1   | ROCK1     |  | GeneCard | DisGenet |
| 408<br>2 | Rho Associated Coiled-Coil Containing Protein Kinase 2   | ROCK2     |  | GeneCard | DisGenet |
| 408<br>3 | Receptor Tyrosine Kinase Like Orphan Receptor 2          | ROR2      |  | GeneCard | DisGenet |
| 408<br>4 | RAR Related Orphan Receptor A                            | RORA      |  | GeneCard | DisGenet |

|          |                                                |           |  |          |          |
|----------|------------------------------------------------|-----------|--|----------|----------|
| 408<br>5 | ROS Proto-Oncogene 1, Receptor Tyrosine Kinase | ROS1      |  | GeneCard | DisGenet |
| 408<br>6 | RP1 Like 1                                     | RP1L1     |  | GeneCard |          |
| 408<br>7 | Replication Protein A1                         | RPA1      |  | GeneCard |          |
| 408<br>8 | Retinitis Pigmentosa GTPase Regulator          | RPGR      |  | GeneCard |          |
| 408<br>9 | RPGRIP1 Like                                   | RPGRIP1L  |  | GeneCard |          |
| 409<br>0 | Ribosomal Protein L10a Pseudogene 3            | RPL10AP3  |  | GeneCard |          |
| 409<br>1 | Ribosomal Protein L15 Pseudogene 15            | RPL15P15  |  | GeneCard |          |
| 409<br>2 | Ribosomal Protein L18a Pseudogene 13           | RPL18AP13 |  | GeneCard |          |
| 409<br>3 | Ribosomal Protein L21 Pseudogene 103           | RPL21P103 |  | GeneCard |          |
| 409<br>4 | Ribosomal Protein L21 Pseudogene 108           | RPL21P108 |  | GeneCard |          |
| 409<br>5 | Ribosomal Protein L21 Pseudogene 41            | RPL21P41  |  | GeneCard |          |
| 409<br>6 | Ribosomal Protein L21 Pseudogene 42            | RPL21P42  |  | GeneCard |          |
| 409<br>7 | Ribosomal Protein L21 Pseudogene 99            | RPL21P99  |  | GeneCard |          |
| 409<br>8 | Ribosomal Protein L23 Pseudogene 4             | RPL23P4   |  | GeneCard |          |
| 409<br>9 | Ribosomal Protein L28 Pseudogene 3             | RPL28P3   |  | GeneCard |          |
| 410<br>0 | Ribosomal Protein L29 Pseudogene 27            | RPL29P27  |  | GeneCard |          |
| 410<br>1 | Ribosomal Protein L29 Pseudogene 29            | RPL29P29  |  | GeneCard |          |
| 410<br>2 | Ribosomal Protein L31 Pseudogene 23            | RPL31P23  |  | GeneCard |          |
| 410<br>3 | Ribosomal Protein L31 Pseudogene 26            | RPL31P26  |  | GeneCard |          |
| 410<br>4 | Ribosomal Protein L32 Pseudogene 12            | RPL32P12  |  | GeneCard |          |

|          |                                            |           |  |          |          |
|----------|--------------------------------------------|-----------|--|----------|----------|
| 410<br>5 | Ribosomal Protein L34 Pseudogene 26        | RPL34P26  |  | GeneCard |          |
| 410<br>6 | Ribosomal Protein L35a Pseudogene 15       | RPL35AP15 |  | GeneCard |          |
| 410<br>7 | Ribosomal Protein L35a Pseudogene 22       | RPL35AP22 |  | GeneCard |          |
| 410<br>8 | Ribosomal Protein L35 Pseudogene 4         | RPL35P4   |  | GeneCard |          |
| 410<br>9 | Ribosomal Protein L36a Pseudogene 23       | RPL36AP23 |  | GeneCard |          |
| 411<br>0 | Ribosomal Protein L3 Like                  | RPL3L     |  | GeneCard |          |
| 411<br>1 | Ribosomal Protein L5 Pseudogene 19         | RPL5P19   |  | GeneCard |          |
| 411<br>2 | Ribosomal Protein L5 Pseudogene 25         | RPL5P25   |  | GeneCard |          |
| 411<br>3 | Ribosomal Protein L7                       | RPL7      |  | GeneCard |          |
| 411<br>4 | Ribosomal Protein L7a Pseudogene 57        | RPL7AP57  |  | GeneCard |          |
| 411<br>5 | Ribosomal Protein L7a Pseudogene 58        | RPL7AP58  |  | GeneCard |          |
| 411<br>6 | Ribosomal Protein L9 Pseudogene 21         | RPL9P21   |  | GeneCard |          |
| 411<br>7 | Ribosomal Protein Lateral Stalk Subunit P0 | RPLP0     |  | GeneCard |          |
| 411<br>8 | Ribophorin I                               | RPN1      |  | GeneCard |          |
| 411<br>9 | Ribosomal Protein S15 Pseudogene 6         | RPS15P6   |  | GeneCard |          |
| 412<br>0 | Ribosomal Protein S19                      | RPS19     |  |          | DisGenet |
| 412<br>1 | Ribosomal Protein S25                      | RPS25     |  | GeneCard |          |
| 412<br>2 | Ribosomal Protein S26 Pseudogene 57        | RPS26P57  |  | GeneCard |          |
| 412<br>3 | Ribosomal Protein S27a                     | RPS27A    |  | GeneCard |          |
| 412<br>4 | RPS27A Pseudogene 2                        | RPS27AP2  |  | GeneCard |          |



|          |                                                 |          |  |          |          |
|----------|-------------------------------------------------|----------|--|----------|----------|
| 412<br>5 | Ribosomal Protein S27 Pseudogene 1              | RPS27P1  |  | GeneCard |          |
| 412<br>6 | Ribosomal Protein S27 Pseudogene 21             | RPS27P21 |  | GeneCard |          |
| 412<br>7 | Ribosomal Protein S28 Pseudogene 1              | RPS28P1  |  | GeneCard |          |
| 412<br>8 | RPS3A Pseudogene 9                              | RPS3AP9  |  | GeneCard |          |
| 412<br>9 | Ribosomal Protein S3 Pseudogene 6               | RPS3P6   |  | GeneCard |          |
| 413<br>0 | Ribosomal Protein S4X Pseudogene 2              | RPS4XP2  |  | GeneCard |          |
| 413<br>1 | Ribosomal Protein S5                            | RPS5     |  | GeneCard |          |
| 413<br>2 | Ribosomal Protein S6 Kinase A1                  | RPS6KA1  |  | GeneCard | DisGenet |
| 413<br>3 | Ribosomal Protein S6 Kinase A5                  | RPS6KA5  |  | GeneCard |          |
| 413<br>4 | Ribosomal Protein S6 Kinase B1                  | RPS6KB1  |  | GeneCard |          |
| 413<br>5 | Ribosomal Protein S6 Pseudogene 20              | RPS6P20  |  | GeneCard |          |
| 413<br>6 | Ribosomal Protein S7 Pseudogene 9               | RPS7P9   |  | GeneCard |          |
| 413<br>7 | Ribosomal Protein SA                            | RPSA     |  |          | DisGenet |
| 413<br>8 | Regulatory Associated Protein Of MTOR Complex 1 | RPTOR    |  | GeneCard |          |
| 413<br>9 | RNA Pseudouridine Synthase D4                   | RPUSD4   |  | GeneCard |          |
| 414<br>0 | Ras Related GTP Binding C                       | RRAGC    |  | GeneCard |          |
| 414<br>1 | RAS Related                                     | RRAS     |  | GeneCard |          |
| 414<br>2 | Ras Responsive Element Binding Protein 1        | RREB1    |  | GeneCard |          |
| 414<br>3 | Ribonucleotide Reductase Catalytic Subunit M1   | RRM1     |  | GeneCard |          |
| 414<br>4 | Ribonucleotide Reductase Regulatory Subunit M2  | RRM2     |  | GeneCard |          |

|          |                                                   |         |      |          |          |
|----------|---------------------------------------------------|---------|------|----------|----------|
| 414<br>5 | Radical S-Adenosyl Methionine Domain Containing 2 | RSAD2   |      | GeneCard | DisGenet |
| 414<br>6 | Remodeling And Spacing Factor 1                   | RSF1    |      | GeneCard |          |
| 414<br>7 | R-Spondin 2                                       | RSPO2   |      | GeneCard |          |
| 414<br>8 | Rhotekin                                          | RTKN    |      | GeneCard |          |
| 414<br>9 | Reticulon 3                                       | RTN3    |      | GeneCard |          |
| 415<br>0 | Reticulon 4                                       | RTN4    |      | GeneCard |          |
| 415<br>1 | RUNX Family Transcription Factor 2                | RUNX2   | OMIM | GeneCard | DisGenet |
| 415<br>2 | RUNX Family Transcription Factor 3                | RUNX3   |      | GeneCard |          |
| 415<br>3 | RuvB Like AAA ATPase 2                            | RUVBL2  |      | GeneCard |          |
| 415<br>4 | Retinoid X Receptor Alpha                         | RXRA    | OMIM | GeneCard | DisGenet |
| 415<br>5 | Retinoid X Receptor Beta                          | RXRB    |      | GeneCard |          |
| 415<br>6 | Retinoid X Receptor Gamma                         | RXRG    |      | GeneCard |          |
| 415<br>7 | Ryanodine Receptor 1                              | RYR1    |      | GeneCard |          |
| 415<br>8 | Ryanodine Receptor 2                              | RYR2    |      | GeneCard |          |
| 415<br>9 | Ryanodine Receptor 3                              | RYR3    |      | GeneCard | DisGenet |
| 416<br>0 | RYR3 Divergent Transcript                         | RYR3-DT |      | GeneCard |          |
| 416<br>1 | S100 Calcium Binding Protein A1                   | S100A1  |      | GeneCard | DisGenet |
| 416<br>2 | S100 Calcium Binding Protein A12                  | S100A12 |      | GeneCard | DisGenet |
| 416<br>3 | S100 Calcium Binding Protein A4                   | S100A4  |      | GeneCard |          |
| 416<br>4 | S100 Calcium Binding Protein A7                   | S100A7  |      |          | DisGenet |

|          |                                                                                 |         |  |          |          |
|----------|---------------------------------------------------------------------------------|---------|--|----------|----------|
| 416<br>5 | S100 Calcium Binding Protein A7A                                                | S100A7A |  |          | DisGenet |
| 416<br>6 | S100 Calcium Binding Protein A8                                                 | S100A8  |  | GeneCard | DisGenet |
| 416<br>7 | S100 Calcium Binding Protein A9                                                 | S100A9  |  | GeneCard | DisGenet |
| 416<br>8 | S100 Calcium Binding Protein B                                                  | S100B   |  | GeneCard | DisGenet |
| 416<br>9 | Sphingosine-1-Phosphate Receptor 1                                              | S1PR1   |  | GeneCard | DisGenet |
| 417<br>0 | Sphingosine-1-Phosphate Receptor 2                                              | S1PR2   |  | GeneCard |          |
| 417<br>1 | Sphingosine-1-Phosphate Receptor 3                                              | S1PR3   |  | GeneCard |          |
| 417<br>2 | Serum Amyloid A1                                                                | SAA1    |  | GeneCard | DisGenet |
| 417<br>3 | Serum Amyloid A2                                                                | SAA2    |  | GeneCard | DisGenet |
| 417<br>4 | Serum Amyloid A3, Pseudogene                                                    | SAA3P   |  | GeneCard | DisGenet |
| 417<br>5 | Serum Amyloid A4, Constitutive                                                  | SAA4    |  | GeneCard |          |
| 417<br>6 | Scaffold Attachment Factor B                                                    | SAFB    |  | GeneCard |          |
| 417<br>7 | S-Antigen Visual Arrestin                                                       | SAG     |  | GeneCard |          |
| 417<br>8 | Sterile Alpha Motif Domain Containing 1                                         | SAMD1   |  | GeneCard | DisGenet |
| 417<br>9 | Sterile Alpha Motif Domain Containing 4A                                        | SAMD4A  |  |          | DisGenet |
| 418<br>0 | Sterile Alpha Motif Domain Containing 9                                         | SAMD9   |  | GeneCard | DisGenet |
| 418<br>1 | SAM And HD Domain Containing Deoxynucleoside Triphosphate Triphosphohydrolase 1 | SAMHD1  |  | GeneCard |          |
| 418<br>2 | SAM Domain, SH3 Domain And Nuclear Localization Signals 1                       | SAMSN1  |  | GeneCard | DisGenet |
| 418<br>3 | Secretion Associated Ras Related GTPase 1B                                      | SAR1B   |  | GeneCard |          |
| 418<br>4 | Sarcosine Dehydrogenase                                                         | SARDH   |  | GeneCard |          |

|          |                                                            |         |      |          |          |
|----------|------------------------------------------------------------|---------|------|----------|----------|
| 418<br>5 | Sterile Alpha And TIR Motif Containing 1                   | SARM1   |      | GeneCard |          |
| 418<br>6 | SAM And SH3 Domain Containing 1                            | SASH1   |      | GeneCard | DisGenet |
| 418<br>7 | Spermidine/Spermine N1-Acetyltransferase 1                 | SAT1    |      |          | DisGenet |
| 418<br>8 | SET Binding Factor 1 Pseudogene 1                          | SBF1P1  |      | GeneCard |          |
| 418<br>9 | SET Binding Factor 2                                       | SBF2    |      | GeneCard |          |
| 419<br>0 | Sterol-C5-Desaturase                                       | SC5D    |      | GeneCard |          |
| 419<br>1 | SREBF Chaperone                                            | SCAP    |      | GeneCard | DisGenet |
| 419<br>2 | Scavenger Receptor Class A Member 3                        | SCARA3  |      | GeneCard |          |
| 419<br>3 | Scavenger Receptor Class A Member 5                        | SCARA5  |      | GeneCard | DisGenet |
| 419<br>4 | Scavenger receptor class B, member 1 (CD36 antigen-like 1) | SCARB1  | OMIM | GeneCard | DisGenet |
| 419<br>5 | Scavenger Receptor Class B Member 2                        | SCARB2  |      | GeneCard |          |
| 419<br>6 | Scavenger Receptor Class F Member 1                        | SCARF1  |      | GeneCard |          |
| 419<br>7 | Scavenger Receptor Family Member Expressed On T Cells 1    | SCART1  |      | GeneCard |          |
| 419<br>8 | Stearoyl-CoA Desaturase                                    | SCD     |      | GeneCard | DisGenet |
| 419<br>9 | Stearoyl-CoA Desaturase 5                                  | SCD5    |      | GeneCard |          |
| 420<br>0 | Secretogranin II                                           | SCG2    |      | GeneCard | DisGenet |
| 420<br>1 | Secretogranin III                                          | SCG3    |      | GeneCard |          |
| 420<br>2 | Secretoglobin Family 1A Member 1                           | SCGB1A1 |      | GeneCard |          |
| 420<br>3 | Stem Cell Inhibitory RNA Transcript                        | SCIRT   |      | GeneCard |          |
| 420<br>4 | Scm Polycomb Group Protein Like 4                          | SCML4   |      | GeneCard |          |

|          |                                                                |         |  |          |          |
|----------|----------------------------------------------------------------|---------|--|----------|----------|
| 420<br>5 | Sodium Voltage-Gated Channel Alpha Subunit 1                   | SCN1A   |  | GeneCard |          |
| 420<br>6 | Sodium Voltage-Gated Channel Beta Subunit 4                    | SCN4B   |  | GeneCard |          |
| 420<br>7 | Sodium Voltage-Gated Channel Alpha Subunit 5                   | SCN5A   |  | GeneCard |          |
| 420<br>8 | Sodium Voltage-Gated Channel Alpha Subunit 7                   | SCN7A   |  |          | DisGenet |
| 420<br>9 | Sodium Channel Epithelial 1 Subunit Alpha                      | SCNN1A  |  | GeneCard |          |
| 421<br>0 | Sodium Channel Epithelial 1 Subunit Beta                       | SCNN1B  |  | GeneCard |          |
| 421<br>1 | Sodium Channel Epithelial 1 Subunit Gamma                      | SCNN1G  |  | GeneCard |          |
| 421<br>2 | Synthesis Of Cytochrome C Oxidase 2                            | SCO2    |  | GeneCard | DisGenet |
| 421<br>3 | Sterol Carrier Protein 2                                       | SCP2    |  | GeneCard | DisGenet |
| 421<br>4 | Signal Peptide, CUB Domain And EGF Like Domain Containing 1    | SCUBE1  |  | GeneCard |          |
| 421<br>5 | Signal Peptide, CUB Domain And EGF Like Domain Containing 2    | SCUBE2  |  | GeneCard |          |
| 421<br>6 | Syndecan 1                                                     | SDC1    |  | GeneCard | DisGenet |
| 421<br>7 | Syndecan 2                                                     | SDC2    |  | GeneCard |          |
| 421<br>8 | Syndecan 4                                                     | SDC4    |  | GeneCard | DisGenet |
| 421<br>9 | Syndecan Binding Protein                                       | SDCBP   |  | GeneCard |          |
| 422<br>0 | Succinate Dehydrogenase Complex Iron Sulfur Subunit B          | SDHB    |  | GeneCard |          |
| 422<br>1 | Succinate Dehydrogenase Complex Subunit C                      | SDHC    |  | GeneCard |          |
| 422<br>2 | SEBOX Homeobox                                                 | SEBOX   |  | GeneCard |          |
| 422<br>3 | SEC11 Homolog B, Signal Peptidase Complex Subunit (Pseudogene) | SEC11B  |  | GeneCard |          |
| 422<br>4 | SEC14 Like Lipid Binding 2                                     | SEC14L2 |  | GeneCard |          |

|          |                                                                                         |           |      |          |          |
|----------|-----------------------------------------------------------------------------------------|-----------|------|----------|----------|
| 422<br>5 | SEC23 Interacting Protein                                                               | SEC23IP   |      | GeneCard |          |
| 422<br>6 | Selectin E (endothelial leukocyte adhesion molecule-1)                                  | SELE      | OMIM | GeneCard | DisGenet |
| 422<br>7 | Selenium Binding Protein 1                                                              | SELENBP1  |      |          | DisGenet |
| 422<br>8 | Selenoprotein P                                                                         | SELENOP   |      | GeneCard |          |
| 422<br>9 | Selenoprotein S                                                                         | SELENOS   |      | GeneCard | DisGenet |
| 423<br>0 | Selenoprotein T Pseudogene 2                                                            | SELENOTP2 |      | GeneCard |          |
| 423<br>1 | Selectin L                                                                              | SELL      |      | GeneCard | DisGenet |
| 423<br>2 | Selectin P (granulocyte membrane protein, 140kD; antigen CD62)                          | SELP      | OMIM | GeneCard | DisGenet |
| 423<br>3 | Selectin P Ligand                                                                       | SELPLG    |      | GeneCard | DisGenet |
| 423<br>4 | Semaphorin 3A                                                                           | SEMA3A    |      | GeneCard |          |
| 423<br>5 | Semaphorin 3C                                                                           | SEMA3C    |      | GeneCard |          |
| 423<br>6 | Semaphorin 3E                                                                           | SEMA3E    |      | GeneCard | DisGenet |
| 423<br>7 | Semaphorin 3F                                                                           | SEMA3F    |      | GeneCard |          |
| 423<br>8 | Semaphorin 4A                                                                           | SEMA4A    |      | GeneCard |          |
| 423<br>9 | Semaphorin 4D                                                                           | SEMA4D    |      | GeneCard | DisGenet |
| 424<br>0 | Semaphorin 5A                                                                           | SEMA5A    |      | GeneCard |          |
| 424<br>1 | Semaphorin 6A                                                                           | SEMA6A    |      |          | DisGenet |
| 424<br>2 | Semaphorin 6D                                                                           | SEMA6D    |      | GeneCard |          |
| 424<br>3 | Semaphorin 7A (John Milton Hagen Blood Group)                                           | SEMA7A    |      | GeneCard | DisGenet |
| 424<br>4 | Smooth Muscle And Endothelial Cell Enriched Migration/Differentiation-Associated LncRNA | SENCR     |      | GeneCard |          |

|          |                                              |           |      |          |          |
|----------|----------------------------------------------|-----------|------|----------|----------|
| 424<br>5 | SUMO Specific Peptidase 2                    | SEN2      |      | GeneCard | DisGenet |
| 424<br>6 | SUMO Peptidase Family Member, NEDD8 Specific | SEN8      |      | GeneCard |          |
| 424<br>7 | Septin 4                                     | SEPTIN4   |      | GeneCard |          |
| 424<br>8 | Serpin Family A Member 1                     | SERPINA1  |      | GeneCard | DisGenet |
| 424<br>9 | Serpin Family A Member 10                    | SERPINA10 |      | GeneCard |          |
| 425<br>0 | Serpin Family A Member 12                    | SERPINA12 |      | GeneCard | DisGenet |
| 425<br>1 | Serpin Family A Member 3                     | SERPINA3  |      | GeneCard | DisGenet |
| 425<br>2 | Serpin Family A Member 4                     | SERPINA4  |      | GeneCard |          |
| 425<br>3 | Serpin Family A Member 5                     | SERPINA5  |      | GeneCard |          |
| 425<br>4 | Serpin Family A Member 9                     | SERPINA9  |      | GeneCard | DisGenet |
| 425<br>5 | Serpin Family B Member 1                     | SERPINB1  |      | GeneCard |          |
| 425<br>6 | Serpin Family B Member 2                     | SERPINB2  |      | GeneCard |          |
| 425<br>7 | Serpin Family B Member 9                     | SERPINB9  |      | GeneCard |          |
| 425<br>8 | Serpin Family C Member 1                     | SERPINC1  |      | GeneCard |          |
| 425<br>9 | Serpin Family D Member 1                     | SERPIND1  |      | GeneCard | DisGenet |
| 426<br>0 | Serpin Family E Member 1                     | SERPINE1  | OMIM | GeneCard | DisGenet |
| 426<br>1 | Serpin Family E Member 2                     | SERPINE2  |      | GeneCard |          |
| 426<br>2 | Serpin Family F Member 1                     | SERPINF1  |      | GeneCard | DisGenet |
| 426<br>3 | Serpin Family F Member 2                     | SERPINF2  |      | GeneCard | DisGenet |
| 426<br>4 | Serpin Family G Member 1                     | SERPING1  |      | GeneCard | DisGenet |

|          |                                                           |          |      |          |          |
|----------|-----------------------------------------------------------|----------|------|----------|----------|
| 426<br>5 | Serpin Family H Member 1                                  | SERPINH1 |      | GeneCard |          |
| 426<br>6 | Serpin Family I Member 1                                  | SERPINI1 |      | GeneCard |          |
| 426<br>7 | Sestrin 2                                                 | SESN2    |      | GeneCard | DisGenet |
| 426<br>8 | SET Domain Containing 2, Histone Lysine Methyltransferase | SETD2    |      |          | DisGenet |
| 426<br>9 | SET Domain Bifurcated Histone Lysine Methyltransferase 1  | SETDB1   |      | GeneCard |          |
| 427<br>0 | Seizure Related 6 Homolog Like                            | SEZ6L    |      | GeneCard |          |
| 427<br>1 | Splicing Factor 3a Subunit 1                              | SF3A1    |      | GeneCard |          |
| 427<br>2 | Splicing Factor 3a Subunit 2                              | SF3A2    |      | GeneCard |          |
| 427<br>3 | Secreted Frizzled Related Protein 4                       | SFRP4    |      | GeneCard | DisGenet |
| 427<br>4 | Secreted Frizzled Related Protein 5                       | SFRP5    |      | GeneCard | DisGenet |
| 427<br>5 | Surfactant Protein A1                                     | SFTPA1   |      |          | DisGenet |
| 427<br>6 | Surfactant Protein A2                                     | SFTPA2   |      |          | DisGenet |
| 427<br>7 | Surfactant Protein B                                      | SFTPB    |      | GeneCard |          |
| 427<br>8 | Surfactant Protein D                                      | SFTPD    | OMIM | GeneCard | DisGenet |
| 427<br>9 | Sarcoglycan Alpha                                         | SGCA     |      | GeneCard |          |
| 428<br>0 | Sarcoglycan Beta                                          | SGCB     |      | GeneCard | DisGenet |
| 428<br>1 | Sarcoglycan Delta                                         | SGCD     |      | GeneCard |          |
| 428<br>2 | Sarcoglycan Zeta                                          | SGCZ     |      | GeneCard |          |
| 428<br>3 | SH3GL Interacting Endocytic Adaptor 1                     | SGIP1    |      | GeneCard |          |
| 428<br>4 | Serum/Glucocorticoid Regulated Kinase 1                   | SGK1     |      | GeneCard |          |



|          |                                                  |         |  |          |          |
|----------|--------------------------------------------------|---------|--|----------|----------|
| 428<br>5 | Sphingomyelin Synthase 1                         | SGMS1   |  | GeneCard | DisGenet |
| 428<br>6 | Sphingomyelin Synthase 2                         | SGMS2   |  | GeneCard | DisGenet |
| 428<br>7 | Shugoshin 2                                      | SGO2    |  | GeneCard |          |
| 428<br>8 | Sphingosine-1-Phosphate Lyase 1                  | SGPL1   |  | GeneCard | DisGenet |
| 428<br>9 | Small G Protein Signaling Modulator 3            | SGSM3   |  |          | DisGenet |
| 429<br>0 | SH2B Adaptor Protein 1                           | SH2B1   |  | GeneCard |          |
| 429<br>1 | SH2B Adaptor Protein 3                           | SH2B3   |  | GeneCard | DisGenet |
| 429<br>2 | SH2 Domain Containing 1A                         | SH2D1A  |  | GeneCard |          |
| 429<br>3 | SH2 Domain Containing 2A                         | SH2D2A  |  | GeneCard |          |
| 429<br>4 | SH3 Domain Containing 21                         | SH3D21  |  | GeneCard |          |
| 429<br>5 | SH3 Domain Containing GRB2 Like 1, Endophilin A2 | SH3GL1  |  | GeneCard |          |
| 429<br>6 | SH3 Domain Containing GRB2 Like 2, Endophilin A1 | SH3GL2  |  | GeneCard |          |
| 429<br>7 | SHANK Associated RH Domain Interactor            | SHARPIN |  | GeneCard |          |
| 429<br>8 | SH2 Domain Containing Adaptor Protein B          | SHB     |  | GeneCard |          |
| 429<br>9 | Sex Hormone Binding Globulin                     | SHBG    |  | GeneCard | DisGenet |
| 430<br>0 | SHC Adaptor Protein 1                            | SHC1    |  | GeneCard | DisGenet |
| 430<br>1 | Sonic Hedgehog Signaling Molecule                | SHH     |  | GeneCard |          |
| 430<br>2 | Serine Hydroxymethyltransferase 1                | SHMT1   |  | GeneCard |          |
| 430<br>3 | Short Stature Homeobox                           | SHOX    |  | GeneCard |          |
| 430<br>4 | Sedoheptulokinase                                | SHPK    |  | GeneCard |          |

|          |                                                           |          |      |          |          |
|----------|-----------------------------------------------------------|----------|------|----------|----------|
| 430<br>5 | Sialic Acid Acetylesterase                                | SIAE     |      | GeneCard |          |
| 430<br>6 | Single Ig And TIR Domain Containing                       | SIGIRR   |      |          | DisGenet |
| 430<br>7 | Sialic Acid Binding Ig Like Lectin 1                      | SIGLEC1  |      | GeneCard | DisGenet |
| 430<br>8 | sialic acid binding Ig like lectin 9                      | SIGLEC9  |      |          | DisGenet |
| 430<br>9 | Salt Inducible Kinase 2                                   | SIK2     |      | GeneCard |          |
| 431<br>0 | SIN3 Transcription Regulator Family Member B              | SIN3B    |      | GeneCard |          |
| 431<br>1 | Signal Regulatory Protein Alpha                           | SIRPA    |      | GeneCard | DisGenet |
| 431<br>2 | Sirtuin, <i>S. cerevisiae</i> , homolog 1                 | SIRT1    | OMIM | GeneCard | DisGenet |
| 431<br>3 | SIRT1 Antisense RNA                                       | SIRT1-AS |      |          | DisGenet |
| 431<br>4 | Sirtuin 2                                                 | SIRT2    |      | GeneCard | DisGenet |
| 431<br>5 | Sirtuin 3                                                 | SIRT3    |      | GeneCard | DisGenet |
| 431<br>6 | Sirtuin 4                                                 | SIRT4    |      | GeneCard |          |
| 431<br>7 | Sirtuin 5                                                 | SIRT5    |      | GeneCard |          |
| 431<br>8 | Sirtuin 6                                                 | SIRT6    |      | GeneCard | DisGenet |
| 431<br>9 | Sirtuin 7                                                 | SIRT7    |      | GeneCard | DisGenet |
| 432<br>0 | S-Phase Kinase Associated Protein 1                       | SKP1     |      | GeneCard |          |
| 432<br>1 | S-Phase Kinase Associated Protein 2                       | SKP2     |      | GeneCard | DisGenet |
| 432<br>2 | Signaling Lymphocytic Activation Molecule Family Member 1 | SLAMF1   |      | GeneCard |          |
| 432<br>3 | SLAM Family Member 6                                      | SLAMF6   |      | GeneCard |          |
| 432<br>4 | SLAM Family Member 7                                      | SLAMF7   |      | GeneCard | DisGenet |

|          |                                    |             |  |          |          |
|----------|------------------------------------|-------------|--|----------|----------|
| 432<br>5 | Solute Carrier Family 10 Member 1  | SLC10A1     |  | GeneCard |          |
| 432<br>6 | Solute Carrier Family 10 Member 2  | SLC10A2     |  | GeneCard | DisGenet |
| 432<br>7 | Solute Carrier Family 11 Member 1  | SLC11A1     |  | GeneCard |          |
| 432<br>8 | Solute Carrier Family 11 Member 2  | SLC11A2     |  | GeneCard |          |
| 432<br>9 | Solute Carrier Family 12 Member 1  | SLC12A1     |  | GeneCard |          |
| 433<br>0 | Solute Carrier Family 12 Member 3  | SLC12A3     |  | GeneCard | DisGenet |
| 433<br>1 | Solute Carrier Family 12 Member 4  | SLC12A4     |  | GeneCard |          |
| 433<br>2 | SLC12A5 And MMP9 Antisense RNA 1   | SLC12A5-AS1 |  | GeneCard |          |
| 433<br>3 | Solute Carrier Family 15 Member 4  | SLC15A4     |  | GeneCard |          |
| 433<br>4 | Solute Carrier Family 16 Member 3  | SLC16A3     |  | GeneCard | DisGenet |
| 433<br>5 | Solute Carrier Family 16 Member 8  | SLC16A8     |  |          | DisGenet |
| 433<br>6 | Solute Carrier Family 17 Member 1  | SLC17A1     |  | GeneCard |          |
| 433<br>7 | Solute Carrier Family 17 Member 3  | SLC17A3     |  | GeneCard |          |
| 433<br>8 | Solute Carrier Family 17 Member 4  | SLC17A4     |  | GeneCard | DisGenet |
| 433<br>9 | Solute Carrier Family 17 Member 5  | SLC17A5     |  | GeneCard | DisGenet |
| 434<br>0 | Solute Carrier Family 18 Member A1 | SLC18A1     |  | GeneCard |          |
| 434<br>1 | Solute Carrier Family 19 Member 1  | SLC19A1     |  | GeneCard |          |
| 434<br>2 | Solute Carrier Family 1 Member 1   | SLC1A1      |  | GeneCard |          |
| 434<br>3 | Solute Carrier Family 1 Member 4   | SLC1A4      |  | GeneCard |          |
| 434<br>4 | Solute Carrier Family 20 Member 1  | SLC20A1     |  | GeneCard |          |

|          |                                    |          |  |          |          |
|----------|------------------------------------|----------|--|----------|----------|
| 434<br>5 | Solute Carrier Family 20 Member 2  | SLC20A2  |  | GeneCard |          |
| 434<br>6 | Solute Carrier Family 22 Member 1  | SLC22A1  |  | GeneCard | DisGenet |
| 434<br>7 | Solute Carrier Family 22 Member 11 | SLC22A11 |  | GeneCard |          |
| 434<br>8 | Solute Carrier Family 22 Member 12 | SLC22A12 |  | GeneCard |          |
| 434<br>9 | Solute Carrier Family 22 Member 18 | SLC22A18 |  |          | DisGenet |
| 435<br>0 | Solute Carrier Family 22 Member 4  | SLC22A4  |  | GeneCard |          |
| 435<br>1 | Solute Carrier Family 22 Member 5  | SLC22A5  |  | GeneCard |          |
| 435<br>2 | Solute Carrier Family 23 Member 2  | SLC23A2  |  | GeneCard |          |
| 435<br>3 | Solute Carrier Family 24 Member 3  | SLC24A3  |  | GeneCard |          |
| 435<br>4 | Solute Carrier Family 25 Member 1  | SLC25A1  |  | GeneCard |          |
| 435<br>5 | Solute Carrier Family 25 Member 17 | SLC25A17 |  | GeneCard |          |
| 435<br>6 | Solute Carrier Family 25 Member 20 | SLC25A20 |  |          | DisGenet |
| 435<br>7 | Solute Carrier Family 25 Member 22 | SLC25A22 |  | GeneCard |          |
| 435<br>8 | Solute Carrier Family 25 Member 24 | SLC25A24 |  | GeneCard |          |
| 435<br>9 | Solute Carrier Family 25 Member 4  | SLC25A4  |  | GeneCard |          |
| 436<br>0 | Solute Carrier Family 25 Member 5  | SLC25A5  |  | GeneCard |          |
| 436<br>1 | Solute Carrier Family 26 Member 4  | SLC26A4  |  |          | DisGenet |
| 436<br>2 | Solute Carrier Family 26 Member 7  | SLC26A7  |  | GeneCard |          |
| 436<br>3 | Solute Carrier Family 27 Member 1  | SLC27A1  |  | GeneCard |          |
| 436<br>4 | Solute Carrier Family 27 Member 6  | SLC27A6  |  | GeneCard |          |

|          |                                                           |          |      |          |          |
|----------|-----------------------------------------------------------|----------|------|----------|----------|
| 436<br>5 | Solute Carrier Family 29 Member 1 (Augustine Blood Group) | SLC29A1  |      | GeneCard |          |
| 436<br>6 | Solute Carrier Family 29 Member 2                         | SLC29A2  |      | GeneCard |          |
| 436<br>7 | Solute Carrier Family 2 Member 1                          | SLC2A1   |      | GeneCard | DisGenet |
| 436<br>8 | Solute Carrier Family 2 Member 10                         | SLC2A10  |      | GeneCard |          |
| 436<br>9 | Solute Carrier Family 2 Member 13                         | SLC2A13  |      | GeneCard |          |
| 437<br>0 | Solute Carrier Family 2 Member 2                          | SLC2A2   |      | GeneCard |          |
| 437<br>1 | Solute Carrier Family 2 Member 3                          | SLC2A3   |      | GeneCard |          |
| 437<br>2 | Solute Carrier Family 2 Member 4                          | SLC2A4   |      | GeneCard |          |
| 437<br>3 | Solute Carrier Family 2 Member 4 Regulator                | SLC2A4RG |      |          | DisGenet |
| 437<br>4 | Solute Carrier Family 2 Member 5                          | SLC2A5   |      | GeneCard |          |
| 437<br>5 | Solute Carrier Family 2 Member 6                          | SLC2A6   |      |          | DisGenet |
| 437<br>6 | Solute Carrier Family 2 Member 9                          | SLC2A9   | OMIM | GeneCard | DisGenet |
| 437<br>7 | Solute Carrier Family 30 Member 8                         | SLC30A8  |      | GeneCard |          |
| 437<br>8 | Solute Carrier Family 31 Member 1                         | SLC31A1  |      | GeneCard |          |
| 437<br>9 | Solute Carrier Family 33 Member 1                         | SLC33A1  |      |          | DisGenet |
| 438<br>0 | Solute Carrier Family 34 Member 1                         | SLC34A1  |      | GeneCard |          |
| 438<br>1 | Solute Carrier Family 35 Member A1                        | SLC35A1  |      |          | DisGenet |
| 438<br>2 | Solute Carrier Family 39 Member 1                         | SLC39A1  |      |          | DisGenet |
| 438<br>3 | Solute Carrier Family 39 Member 2                         | SLC39A2  |      | GeneCard |          |
| 438<br>4 | Solute Carrier Family 39 Member 8                         | SLC39A8  |      |          | DisGenet |

|          |                                                      |         |  |          |          |
|----------|------------------------------------------------------|---------|--|----------|----------|
| 438<br>5 | Solute Carrier Family 3 Member 2                     | SLC3A2  |  |          | DisGenet |
| 438<br>6 | Solute Carrier Family 40 Member 1                    | SLC40A1 |  | GeneCard | DisGenet |
| 438<br>7 | Solute Carrier Family 44 Member 3                    | SLC44A3 |  | GeneCard |          |
| 438<br>8 | Solute Carrier Family 45 Member 3                    | SLC45A3 |  | GeneCard |          |
| 438<br>9 | Solute Carrier Family 46 Member 1                    | SLC46A1 |  | GeneCard |          |
| 439<br>0 | Solute Carrier Family 4 Member 1 (Diego Blood Group) | SLC4A1  |  | GeneCard |          |
| 439<br>1 | Solute Carrier Family 4 Member 5                     | SLC4A5  |  | GeneCard |          |
| 439<br>2 | Solute Carrier Family 52 Member 1                    | SLC52A1 |  |          | DisGenet |
| 439<br>3 | Solute Carrier Family 52 Member 2                    | SLC52A2 |  |          | DisGenet |
| 439<br>4 | Solute Carrier Family 5 Member 1                     | SLC5A1  |  | GeneCard |          |
| 439<br>5 | Solute Carrier Family 5 Member 10                    | SLC5A10 |  | GeneCard | DisGenet |
| 439<br>6 | Solute Carrier Family 5 Member 11                    | SLC5A11 |  | GeneCard |          |
| 439<br>7 | Solute Carrier Family 5 Member 2                     | SLC5A2  |  |          | DisGenet |
| 439<br>8 | Solute Carrier Family 5 Member 7                     | SLC5A7  |  | GeneCard |          |
| 439<br>9 | Solute Carrier Family 6 Member 13                    | SLC6A13 |  | GeneCard |          |
| 440<br>0 | Solute Carrier Family 6 Member 2                     | SLC6A2  |  | GeneCard |          |
| 440<br>1 | Solute Carrier Family 6 Member 3                     | SLC6A3  |  | GeneCard |          |
| 440<br>2 | Solute Carrier Family 6 Member 4                     | SLC6A4  |  | GeneCard | DisGenet |
| 440<br>3 | Solute Carrier Family 6 Member 8                     | SLC6A8  |  |          | DisGenet |
| 440<br>4 | Solute Carrier Family 7 Member 5                     | SLC7A5  |  |          | DisGenet |

|          |                                                            |          |  |          |          |
|----------|------------------------------------------------------------|----------|--|----------|----------|
| 440<br>5 | Solute Carrier Family 8 Member A1                          | SLC8A1   |  | GeneCard | DisGenet |
| 440<br>6 | Solute Carrier Family 9 Member A1                          | SLC9A1   |  | GeneCard | DisGenet |
| 440<br>7 | SLC9A3 Regulator 2                                         | SLC9A3R2 |  | GeneCard |          |
| 440<br>8 | Solute Carrier Organic Anion Transporter Family Member 5A1 | SLCO5A1  |  | GeneCard |          |
| 440<br>9 | Solute Carrier Organic Anion Transporter Family Member 6A1 | SLCO6A1  |  |          | DisGenet |
| 441<br>0 | Systemic Lupus Erythematosus, Susceptibility To, 12        | SLEB12   |  | GeneCard |          |
| 441<br>1 | Systemic Lupus Erythematosus, Susceptibility To, 13        | SLEB13   |  | GeneCard |          |
| 441<br>2 | Systemic Lupus Erythematosus, Susceptibility To, 14        | SLEB14   |  | GeneCard |          |
| 441<br>3 | Systemic Lupus Erythematosus, Susceptibility To, 15        | SLEB15   |  | GeneCard |          |
| 441<br>4 | Systemic Lupus Erythematosus Susceptibility 3              | SLEB3    |  | GeneCard |          |
| 441<br>5 | Systemic Lupus Erythematosus, Susceptibility To, 4         | SLEB4    |  | GeneCard |          |
| 441<br>6 | Systemic Lupus Erythematosus, Susceptibility To, 5         | SLEB5    |  | GeneCard |          |
| 441<br>7 | Systemic Lupus Erythematosus, Susceptibility To, 7         | SLEB7    |  | GeneCard |          |
| 441<br>8 | Systemic Lupus Erythematosus, Susceptibility To, 8         | SLEB8    |  | GeneCard |          |
| 441<br>9 | Systemic Lupus Erythematosus With Hemolytic Anemia 1       | SLEH1    |  | GeneCard |          |
| 442<br>0 | Systemic Lupus Erythematosus With Nephritis 1              | SLEN1    |  | GeneCard |          |
| 442<br>1 | Systemic Lupus Erythematosus With Nephritis 2              | SLEN2    |  | GeneCard |          |
| 442<br>2 | Systemic Lupus Erythematosus With Nephritis 3              | SLEN3    |  | GeneCard |          |
| 442<br>3 | Slit Guidance Ligand 2                                     | SLIT2    |  | GeneCard | DisGenet |
| 442<br>4 | SLIT And NTRK Like Family Member 3                         | SLITRK3  |  | GeneCard |          |

|          |                                                                                                   |         |      |          |          |
|----------|---------------------------------------------------------------------------------------------------|---------|------|----------|----------|
| 442<br>5 | Secretory Leukocyte Peptidase Inhibitor                                                           | SLPI    |      | GeneCard | DisGenet |
| 442<br>6 | Secreted LY6/PLAUR Domain Containing 1                                                            | SLURP1  |      | GeneCard |          |
| 442<br>7 | SMAD Family Member 1                                                                              | SMAD1   |      | GeneCard | DisGenet |
| 442<br>8 | SMAD Family Member 2                                                                              | SMAD2   |      | GeneCard |          |
| 442<br>9 | SMAD Family Member 3                                                                              | SMAD3   |      | GeneCard | DisGenet |
| 443<br>0 | SMAD Family Member 4                                                                              | SMAD4   |      | GeneCard |          |
| 443<br>1 | SMAD Family Member 5                                                                              | SMAD5   |      | GeneCard |          |
| 443<br>2 | SMAD Family Member 6                                                                              | SMAD6   |      | GeneCard |          |
| 443<br>3 | SMAD Family Member 7                                                                              | SMAD7   |      | GeneCard | DisGenet |
| 443<br>4 | SWI/SNF Related, Matrix Associated, Actin Dependent Regulator Of Chromatin, Subfamily A, Member 1 | SMARCA1 |      | GeneCard |          |
| 443<br>5 | SWI/SNF Related, Matrix Associated, Actin Dependent Regulator Of Chromatin, Subfamily A, Member 2 | SMARCA2 |      | GeneCard |          |
| 443<br>6 | SWI/SNF Related, Matrix Associated, Actin Dependent Regulator Of Chromatin, Subfamily A, Member 4 | SMARCA4 |      | GeneCard | DisGenet |
| 443<br>7 | SWI/SNF Related, Matrix Associated, Actin Dependent Regulator Of Chromatin, Subfamily A, Member 5 | SMARCA5 |      | GeneCard |          |
| 443<br>8 | SWI/SNF Related, Matrix Associated, Actin Dependent Regulator Of Chromatin, Subfamily A Like 1    | SMARCA1 | OMIM | GeneCard |          |
| 443<br>9 | Structural Maintenance Of Chromosomes 1B                                                          | SMC1B   |      | GeneCard |          |
| 444<br>0 | Sperm Mitochondria Associated Cysteine Rich Protein                                               | SMCP    |      |          | DisGenet |
| 444<br>1 | Smooth Muscle Induced LncRNA, Enhancer Of Proliferation                                           | SMILR   |      | GeneCard |          |
| 444<br>2 | Small Integral Membrane Protein 35                                                                | SMIM35  |      | GeneCard |          |
| 444<br>3 | Survival Of Motor Neuron 1, Telomeric                                                             | SMN1    |      |          | DisGenet |
| 444<br>4 | Survival Of Motor Neuron 2, Centromeric                                                           | SMN2    |      |          | DisGenet |



|          |                                                                 |         |  |          |          |
|----------|-----------------------------------------------------------------|---------|--|----------|----------|
| 444<br>5 | Smoothened, Frizzled Class Receptor                             | SMO     |  | GeneCard |          |
| 444<br>6 | SPARC Related Modular Calcium Binding 1                         | SMOC1   |  | GeneCard |          |
| 444<br>7 | SPARC Related Modular Calcium Binding 2                         | SMOC2   |  | GeneCard |          |
| 444<br>8 | Spermine Oxidase                                                | SMOX    |  |          | DisGenet |
| 444<br>9 | Sphingomyelin Phosphodiesterase 1                               | SMPD1   |  | GeneCard | DisGenet |
| 445<br>0 | Sphingomyelin Phosphodiesterase 2                               | SMPD2   |  | GeneCard | DisGenet |
| 445<br>1 | Sphingomyelin Phosphodiesterase 3                               | SMPD3   |  | GeneCard | DisGenet |
| 445<br>2 | Sphingomyelin Phosphodiesterase Acid Like 3A                    | SMPDL3A |  | GeneCard |          |
| 445<br>3 | Spermine Synthase                                               | SMS     |  |          | DisGenet |
| 445<br>4 | Smoothelin                                                      | SMTN    |  | GeneCard |          |
| 445<br>5 | single-strand-selective monofunctional uracil-DNA glycosylase 1 | SMUG1   |  |          | DisGenet |
| 445<br>6 | Snail Family Transcriptional Repressor 1                        | SNAI1   |  | GeneCard | DisGenet |
| 445<br>7 | Snail Family Transcriptional Repressor 2                        | SNAI2   |  |          | DisGenet |
| 445<br>8 | Synuclein Alpha                                                 | SNCA    |  | GeneCard |          |
| 445<br>9 | Synuclein Alpha Interacting Protein                             | SNCAIP  |  | GeneCard |          |
| 446<br>0 | Synuclein Beta                                                  | SNCB    |  | GeneCard |          |
| 446<br>1 | Synuclein Gamma                                                 | SNCG    |  | GeneCard |          |
| 446<br>2 | SNF8 Subunit Of ESCRT-II                                        | SNF8    |  | GeneCard | DisGenet |
| 446<br>3 | Small Nucleolar RNA Host Gene 12                                | SNHG12  |  | GeneCard |          |
| 446<br>4 | Small Nucleolar RNA Host Gene 16                                | SNHG16  |  | GeneCard | DisGenet |

|          |                                                                             |         |      |          |          |
|----------|-----------------------------------------------------------------------------|---------|------|----------|----------|
| 446<br>5 | Small Nucleolar RNA Host Gene 7                                             | SNHG7   |      | GeneCard |          |
| 446<br>6 | Small Nucleolar RNA Host Gene 8                                             | SNHG8   |      | GeneCard |          |
| 446<br>7 | Stannin                                                                     | SNN     |      | GeneCard |          |
| 446<br>8 | Small Nuclear Ribonucleoprotein U1 Subunit 70                               | SNRNP70 |      | GeneCard |          |
| 446<br>9 | Small Nuclear Ribonucleoprotein Polypeptides B And B1                       | SNRPB   |      | GeneCard |          |
| 447<br>0 | Small Nuclear Ribonucleoprotein Polypeptide B2                              | SNRPB2  |      | GeneCard | DisGenet |
| 447<br>1 | Small Nuclear Ribonucleoprotein D1 Polypeptide                              | SNRPD1  |      | GeneCard |          |
| 447<br>2 | Small Nuclear Ribonucleoprotein D3 Polypeptide                              | SNRPD3  |      | GeneCard |          |
| 447<br>3 | Small Nuclear Ribonucleoprotein Polypeptide E                               | SNRPE   |      | GeneCard |          |
| 447<br>4 | Small Nuclear Ribonucleoprotein Polypeptide N                               | SNRPN   |      | GeneCard |          |
| 447<br>5 | Syntrophin Alpha 1                                                          | SNTA1   |      | GeneCard |          |
| 447<br>6 | Sorting Nexin 19                                                            | SNX19   |      |          | DisGenet |
| 447<br>7 | Sorting Nexin 10                                                            | SNX10   |      | GeneCard |          |
| 447<br>8 | Sorting Nexin 16                                                            | SNX16   |      | GeneCard |          |
| 447<br>9 | Sorting Nexin 17                                                            | SNX17   |      | GeneCard |          |
| 448<br>0 | Sorting Nexin 19                                                            | SNX19   |      | GeneCard |          |
| 448<br>1 | Sterol O-acyltransferase 1 (acyl-Coenzyme A: cholesterol acyltransferase 1) | SOAT1   | OMIM | GeneCard | DisGenet |
| 448<br>2 | Sterol O-acyltransferase 2                                                  | SOAT2   | OMIM | GeneCard | DisGenet |
| 448<br>3 | Suppressor Of Cytokine Signaling 1                                          | SOCS1   |      | GeneCard | DisGenet |
| 448<br>4 | Suppressor Of Cytokine Signaling 3                                          | SOCS3   |      | GeneCard | DisGenet |

|          |                                                                 |        |      |          |          |
|----------|-----------------------------------------------------------------|--------|------|----------|----------|
| 448<br>5 | Suppressor Of Cytokine Signaling 5                              | SOCS5  |      | GeneCard |          |
| 448<br>6 | Suppressor Of Cytokine Signaling 6                              | SOCS6  |      | GeneCard |          |
| 448<br>7 | Superoxide Dismutase 1                                          | SOD1   |      | GeneCard | DisGenet |
| 448<br>8 | Superoxide Dismutase 2                                          | SOD2   |      | GeneCard | DisGenet |
| 448<br>9 | Superoxide Dismutase 3                                          | SOD3   |      | GeneCard | DisGenet |
| 449<br>0 | Spermatogenesis And Oogenesis Specific Basic Helix-Loop-Helix 1 | SOHLH1 | OMIM | GeneCard |          |
| 449<br>1 | Spermatogenesis And Oogenesis Specific Basic Helix-Loop-Helix 2 | SOHLH2 |      | GeneCard |          |
| 449<br>2 | Sorbin And SH3 Domain Containing 3                              | SORBS3 |      | GeneCard | DisGenet |
| 449<br>3 | Sortilin Related VPS10 Domain Containing Receptor 1             | SORCS1 |      | GeneCard |          |
| 449<br>4 | Sortilin Related VPS10 Domain Containing Receptor 2             | SORCS2 |      | GeneCard |          |
| 449<br>5 | Sorbitol Dehydrogenase                                          | SORD   |      | GeneCard |          |
| 449<br>6 | Sortilin Related Receptor 1                                     | SORL1  | OMIM | GeneCard | DisGenet |
| 449<br>7 | Sortilin 1                                                      | SORT1  |      | GeneCard | DisGenet |
| 449<br>8 | SOS Ras/Rac Guanine Nucleotide Exchange Factor 1                | SOS1   |      | GeneCard | DisGenet |
| 449<br>9 | Sclerostin                                                      | SOST   |      | GeneCard |          |
| 450<br>0 | SRY-Box Transcription Factor 18                                 | SOX18  |      | GeneCard | DisGenet |
| 450<br>1 | SRY-Box Transcription Factor 6                                  | SOX6   |      | GeneCard | DisGenet |
| 450<br>2 | SRY-Box Transcription Factor 7                                  | SOX7   |      | GeneCard |          |
| 450<br>3 | SRY-Box Transcription Factor 9                                  | SOX9   |      | GeneCard |          |
| 450<br>4 | Sp1 Transcription Factor                                        | SP1    |      | GeneCard | DisGenet |

|          |                                                     |         |  |          |          |
|----------|-----------------------------------------------------|---------|--|----------|----------|
| 450<br>5 | SP110 Nuclear Body Protein                          | SP110   |  | GeneCard |          |
| 450<br>6 | Sp3 Transcription Factor                            | SP3     |  | GeneCard |          |
| 450<br>7 | Sp6 transcription factor                            | SP6     |  |          | DisGenet |
| 450<br>8 | Sp7 Transcription Factor                            | SP7     |  | GeneCard |          |
| 450<br>9 | Small Regulatory Polypeptide Of Amino Acid Response | SPAAR   |  | GeneCard |          |
| 451<br>0 | Secreted Protein Acidic And Cysteine Rich           | SPARC   |  | GeneCard | DisGenet |
| 451<br>1 | SPARC Like 1                                        | SPARCL1 |  | GeneCard |          |
| 451<br>2 | Spermatogenesis Associated 6 Like                   | SPATA6L |  | GeneCard |          |
| 451<br>3 | Spermatogenesis Associated 7                        | SPATA7  |  | GeneCard |          |
| 451<br>4 | SPC24 Component Of NDC80 Kinetochore Complex        | SPC24   |  | GeneCard |          |
| 451<br>5 | Striated Muscle Enriched Protein Kinase             | SPEG    |  | GeneCard |          |
| 451<br>6 | SPG21 Abhydrolase Domain Containing, Maspardin      | SPG21   |  | GeneCard |          |
| 451<br>7 | SPG7 Matrix AAA Peptidase Subunit, Paraplegin       | SPG7    |  | GeneCard | DisGenet |
| 451<br>8 | Sphingosine Kinase 1                                | SPHK1   |  | GeneCard | DisGenet |
| 451<br>9 | Sphingosine Kinase 2                                | SPHK2   |  |          | DisGenet |
| 452<br>0 | SPHK1 Interactor, AKAP Domain Containing            | SPHKAP  |  | GeneCard |          |
| 452<br>1 | Spi-1 Proto-Oncogene                                | SPI1    |  | GeneCard | DisGenet |
| 452<br>2 | Scaffold Protein Involved In DNA Repair             | SPIDR   |  | GeneCard |          |
| 452<br>3 | Serine Peptidase Inhibitor Kazal Type 1             | SPINK1  |  | GeneCard |          |
| 452<br>4 | SPO11 Initiator Of Meiotic Double Stranded Breaks   | SPO11   |  | GeneCard |          |

|          |                                                            |        |      |          |          |
|----------|------------------------------------------------------------|--------|------|----------|----------|
| 452<br>5 | Spondin 2                                                  | SPON2  |      |          | DisGenet |
| 452<br>6 | Secreted phosphoprotein-1 (osteopontin, bone sialoprotein) | SPP1   | OMIM | GeneCard | DisGenet |
| 452<br>7 | Signal Peptide Peptidase Like 2A                           | SPPL2A |      | GeneCard |          |
| 452<br>8 | Signal Peptide Peptidase Like 2B                           | SPPL2B |      | GeneCard |          |
| 452<br>9 | Sepiapterin Reductase                                      | SPR    |      | GeneCard |          |
| 453<br>0 | Small Proline Rich Protein 3                               | SPRR3  |      | GeneCard |          |
| 453<br>1 | Sprouty RTK Signaling Antagonist 1                         | SPRY1  |      | GeneCard | DisGenet |
| 453<br>2 | Sprouty RTK Signaling Antagonist 2                         | SPRY2  |      | GeneCard |          |
| 453<br>3 | Sprouty RTK Signaling Antagonist 4                         | SPRY4  |      | GeneCard |          |
| 453<br>4 | SPRY Domain Containing 4                                   | SPRYD4 |      | GeneCard |          |
| 453<br>5 | Spectrin Beta, Erythrocytic                                | SPTB   |      | GeneCard |          |
| 453<br>6 | Serine Palmitoyltransferase Long Chain Base Subunit 1      | SPTLC1 |      | GeneCard |          |
| 453<br>7 | Spexin Hormone                                             | SPX    |      | GeneCard | DisGenet |
| 453<br>8 | Spermatogenic Leucine Zipper 1                             | SPZ1   |      |          | DisGenet |
| 453<br>9 | Squalene Epoxidase                                         | SQLE   |      | GeneCard |          |
| 454<br>0 | Sulfide Quinone Oxidoreductase                             | SQOR   |      | GeneCard |          |
| 454<br>1 | Sequestosome 1                                             | SQSTM1 |      | GeneCard | DisGenet |
| 454<br>2 | Steroid Receptor RNA Activator 1                           | SRA1   |      | GeneCard |          |
| 454<br>3 | SRC Proto-Oncogene, Non-Receptor Tyrosine Kinase           | SRC    |      | GeneCard | DisGenet |
| 454<br>4 | Steroid 5 Alpha-Reductase 1                                | SRD5A1 |      | GeneCard |          |

|          |                                                          |        |  |          |          |
|----------|----------------------------------------------------------|--------|--|----------|----------|
| 454<br>5 | Steroid 5 Alpha-Reductase 2                              | SRD5A2 |  | GeneCard |          |
| 454<br>6 | Sterol Regulatory Element Binding Transcription Factor 1 | SREBF1 |  | GeneCard | DisGenet |
| 454<br>7 | Sterol Regulatory Element Binding Transcription Factor 2 | SREBF2 |  | GeneCard | DisGenet |
| 454<br>8 | Serum Response Factor                                    | SRF    |  | GeneCard |          |
| 454<br>9 | Serum Response Factor Binding Protein 1                  | SRFBP1 |  | GeneCard |          |
| 455<br>0 | Serglycin                                                | SRGN   |  | GeneCard |          |
| 455<br>1 | Sorcin                                                   | SRI    |  |          | DisGenet |
| 455<br>2 | Sorcin Pseudogene 1                                      | SRIP1  |  | GeneCard |          |
| 455<br>3 | Serine/Arginine repetitive matrix 2                      | SRRM2  |  |          | DisGenet |
| 455<br>4 | Serine and Arginine Rich Splicing Factor 1               | SRSF1  |  |          | DisGenet |
| 455<br>5 | Serine and Arginine Rich Splicing Factor 2               | SRSF2  |  | GeneCard | DisGenet |
| 455<br>6 | Serine and Arginine Rich Splicing Factor 3               | SRSF3  |  | GeneCard |          |
| 455<br>7 | Serine and Arginine Rich Splicing Factor 5               | SRSF5  |  | GeneCard |          |
| 455<br>8 | Serine and Arginine Rich Splicing Factor 7               | SRSF7  |  | GeneCard |          |
| 455<br>9 | Sulfiredoxin 1                                           | SRXN1  |  | GeneCard |          |
| 456<br>0 | Sex Determining Region Y                                 | SRY    |  | GeneCard | DisGenet |
| 456<br>1 | Small RNA Binding Exonuclease Protection Factor La       | SSB    |  | GeneCard |          |
| 456<br>2 | Single Stranded DNA Binding Protein 1                    | SSBP1  |  |          | DisGenet |
| 456<br>3 | Single Stranded DNA Binding Protein 3                    | SSBP3  |  | GeneCard |          |
| 456<br>4 | Slingshot Protein Phosphatase 1                          | SSH1   |  | GeneCard |          |

|          |                                                              |         |  |          |          |
|----------|--------------------------------------------------------------|---------|--|----------|----------|
| 456<br>5 | Structure Specific Recognition Protein 1                     | SSRP1   |  | GeneCard | DisGenet |
| 456<br>6 | Somatostatin                                                 | SST     |  | GeneCard | DisGenet |
| 456<br>7 | Somatostatin Receptor 2                                      | SSTR2   |  | GeneCard | DisGenet |
| 456<br>8 | Somatostatin Receptor 4                                      | SSTR4   |  |          | DisGenet |
| 456<br>9 | ST13 Hsp70 Interacting Protein                               | ST13    |  | GeneCard |          |
| 457<br>0 | ST14 Transmembrane Serine Protease Matriptase                | ST14    |  | GeneCard | DisGenet |
| 457<br>1 | Suppression Of Tumorigenicity 2                              | ST2     |  | GeneCard | DisGenet |
| 457<br>2 | ST3 Beta-Galactoside Alpha-2,3-Sialyltransferase 1           | ST3GAL1 |  | GeneCard |          |
| 457<br>3 | ST3 Beta-Galactoside Alpha-2,3-Sialyltransferase 4           | ST3GAL4 |  | GeneCard | DisGenet |
| 457<br>4 | ST3 Beta-Galactoside Alpha-2,3-Sialyltransferase 5           | ST3GAL5 |  | GeneCard |          |
| 457<br>5 | ST6 Beta-Galactoside Alpha-2,6-Sialyltransferase 1           | ST6GAL1 |  | GeneCard | DisGenet |
| 457<br>6 | ST8 Alpha-N-Acetyl-Neuraminide Alpha-2,8-Sialyltransferase 1 | ST8SIA1 |  | GeneCard | DisGenet |
| 457<br>7 | ST8 Alpha-N-Acetyl-Neuraminide Alpha-2,8-Sialyltransferase 4 | ST8SIA4 |  | GeneCard |          |
| 457<br>8 | Stabilin 1                                                   | STAB1   |  | GeneCard | DisGenet |
| 457<br>9 | Stabilin 2                                                   | STAB2   |  | GeneCard |          |
| 458<br>0 | Stromal Antigen 3                                            | STAG3   |  | GeneCard |          |
| 458<br>1 | Stromal Antigen 3-Like 4 (Pseudogene)                        | STAG3L4 |  | GeneCard |          |
| 458<br>2 | STAM Binding Protein                                         | STAMBP  |  | GeneCard |          |
| 458<br>3 | Signal Transducing Adaptor Family Member 1                   | STAP1   |  | GeneCard |          |
| 458<br>4 | Steroidogenic Acute Regulatory Protein                       | STAR    |  | GeneCard | DisGenet |

|          |                                                     |             |  |          |          |
|----------|-----------------------------------------------------|-------------|--|----------|----------|
| 458<br>5 | StAR Related Lipid Transfer Domain Containing 7     | STARD7      |  | GeneCard |          |
| 458<br>6 | Steroidogenic Acute Regulatory Protein Pseudogene 1 | STARP1      |  | GeneCard |          |
| 458<br>7 | Signal Transducer And Activator Of Transcription 1  | STAT1       |  | GeneCard | DisGenet |
| 458<br>8 | Signal Transducer And Activator Of Transcription 3  | STAT3       |  | GeneCard | DisGenet |
| 458<br>9 | Signal Transducer And Activator Of Transcription 4  | STAT4       |  | GeneCard | DisGenet |
| 459<br>0 | Signal Transducer And Activator Of Transcription 5A | STAT5A      |  | GeneCard |          |
| 459<br>1 | Signal Transducer And Activator Of Transcription 5B | STAT5B      |  | GeneCard |          |
| 459<br>2 | Signal Transducer And Activator Of Transcription 6  | STAT6       |  | GeneCard | DisGenet |
| 459<br>3 | Staufen Double-Stranded RNA Binding Protein 1       | STAU1       |  | GeneCard |          |
| 459<br>4 | Stanniocalcin 1                                     | STC1        |  | GeneCard |          |
| 459<br>5 | Stanniocalcin 2                                     | STC2        |  | GeneCard | DisGenet |
| 459<br>6 | STEAP Family Member 1                               | STEAP1      |  | GeneCard |          |
| 459<br>7 | STEAP Family Member 1B                              | STEAP1B     |  | GeneCard |          |
| 459<br>8 | STEAP1B Antisense RNA 1                             | STEAP1B-AS1 |  | GeneCard |          |
| 459<br>9 | STEAP2 Antisense RNA 1                              | STEAP2-AS1  |  | GeneCard |          |
| 460<br>0 | STEAP4 Metalloreductase                             | STEAP4      |  | GeneCard | DisGenet |
| 460<br>1 | Stromal Interaction Molecule 1                      | STIM1       |  | GeneCard | DisGenet |
| 460<br>2 | Serine/Threonine Kinase 11                          | STK11       |  | GeneCard | DisGenet |
| 460<br>3 | Serine/Threonine Kinase 25                          | STK25       |  |          | DisGenet |
| 460<br>4 | Serine/Threonine Kinase 38                          | STK38       |  | GeneCard |          |



|          |                                                    |          |  |          |          |
|----------|----------------------------------------------------|----------|--|----------|----------|
| 460<br>5 | Serine/Threonine Kinase 38 Like                    | STK38L   |  | GeneCard |          |
| 460<br>6 | Serine/Threonine Kinase 40                         | STK40    |  | GeneCard |          |
| 460<br>7 | Stathmin 1                                         | STMN1    |  | GeneCard |          |
| 460<br>8 | Stimulated By Retinoic Acid 8                      | STRA8    |  | GeneCard |          |
| 460<br>9 | Striatin Interacting Protein 2                     | STRIP2   |  |          | DisGenet |
| 461<br>0 | Steroid Sulfatase                                  | STS      |  | GeneCard | DisGenet |
| 461<br>1 | STIP1 Homology And U-Box Containing Protein 1      | STUB1    |  | GeneCard | DisGenet |
| 461<br>2 | Syntaxin Binding Protein 3                         | STXBP3   |  | GeneCard |          |
| 461<br>3 | Syntaxin Binding Protein 5                         | STXBP5   |  | GeneCard |          |
| 461<br>4 | SUB1 Regulator Of Transcription                    | SUB1     |  | GeneCard |          |
| 461<br>5 | Succinate-CoA Ligase ADP-Forming Subunit Beta      | SUCLA2   |  |          | DisGenet |
| 461<br>6 | SUCLA2 Pseudogene 2                                | SUCLA2P2 |  | GeneCard |          |
| 461<br>7 | Succinate-CoA Ligase GDP/ADP-Forming Subunit Alpha | SUCLG1   |  | GeneCard |          |
| 461<br>8 | Succinate Receptor 1                               | SUCNR1   |  | GeneCard | DisGenet |
| 461<br>9 | Sulfatase 2                                        | SULF2    |  | GeneCard |          |
| 462<br>0 | Sulfotransferase Family 1A Member 3                | SULT1A3  |  | GeneCard |          |
| 462<br>1 | Sulfotransferase Family 1E Member 1                | SULT1E1  |  | GeneCard |          |
| 462<br>2 | Sulfotransferase Family 2A Member 1                | SULT2A1  |  | GeneCard | DisGenet |
| 462<br>3 | Sulfotransferase Family 2B Member 1                | SULT2B1  |  | GeneCard |          |
| 462<br>4 | Small Ubiquitin Like Modifier 1                    | SUMO1    |  | GeneCard | DisGenet |

|          |                                                                            |         |  |          |          |
|----------|----------------------------------------------------------------------------|---------|--|----------|----------|
| 462<br>5 | Sad1 And UNC84 Domain Containing 2                                         | SUN2    |  | GeneCard |          |
| 462<br>6 | SPT3 Homolog, SAGA And STAGA Complex Component                             | SUPT3H  |  | GeneCard |          |
| 462<br>7 | SURF1 Cytochrome C Oxidase Assembly Factor                                 | SURF1   |  | GeneCard |          |
| 462<br>8 | Surfeit 2                                                                  | SURF2   |  | GeneCard |          |
| 462<br>9 | Surfeit 4                                                                  | SURF4   |  | GeneCard |          |
| 463<br>0 | Sushi Domain Containing 2                                                  | SUSD2   |  | GeneCard |          |
| 463<br>1 | SUV39H1 Histone Lysine Methyltransferase                                   | SUV39H1 |  | GeneCard |          |
| 463<br>2 | SUV39H2 Histone Lysine Methyltransferase                                   | SUV39H2 |  | GeneCard |          |
| 463<br>3 | Sushi, Von Willebrand Factor Type A, EGF And Pentraxin Domain Containing 1 | SVEP1   |  | GeneCard |          |
| 463<br>4 | Synaptonemal Complex Central Element Protein 1                             | SYCE1   |  | GeneCard |          |
| 463<br>5 | Synaptonemal Complex Protein 3                                             | SYCP3   |  | GeneCard |          |
| 463<br>6 | Spleen Associated Tyrosine Kinase                                          | SYK     |  | GeneCard | DisGenet |
| 463<br>7 | Synapsin II                                                                | SYN2    |  | GeneCard |          |
| 463<br>8 | Spectrin Repeat Containing Nuclear Envelope Protein 1                      | SYNE1   |  | GeneCard |          |
| 463<br>9 | Spectrin Repeat Containing Nuclear Envelope Protein 2                      | SYNE2   |  | GeneCard |          |
| 464<br>0 | Spectrin Repeat Containing Nuclear Envelope Family Member 3                | SYNE3   |  | GeneCard |          |
| 464<br>1 | Synemin                                                                    | SYNM    |  | GeneCard |          |
| 464<br>2 | Synaptopodin 2                                                             | SYNPO2  |  | GeneCard |          |
| 464<br>3 | Synaptopodin 2 Like                                                        | SYNPO2L |  | GeneCard |          |
| 464<br>4 | Synaptophysin                                                              | SYP     |  | GeneCard |          |

|          |                                                                       |          |  |          |          |
|----------|-----------------------------------------------------------------------|----------|--|----------|----------|
| 464<br>5 | Synaptotagmin 1                                                       | SYT1     |  |          | DisGenet |
| 464<br>6 | Synaptotagmin 15                                                      | SYT15    |  | GeneCard |          |
| 464<br>7 | Synaptotagmin 7                                                       | SYT7     |  | GeneCard |          |
| 464<br>8 | Synoviolin 1                                                          | SYVN1    |  | GeneCard |          |
| 464<br>9 | TGF-Beta Activated Kinase 1 (MAP3K7) Binding Protein 2                | TAB2     |  | GeneCard |          |
| 465<br>0 | Tachykinin Precursor 1                                                | TAC1     |  |          | DisGenet |
| 465<br>1 | Tachykinin Receptor 1                                                 | TACR1    |  | GeneCard |          |
| 465<br>2 | Transcriptional Adaptor 1                                             | TADA1    |  |          | DisGenet |
| 465<br>3 | TATA-Box Binding Protein Associated Factor 3                          | TAF3     |  |          | DisGenet |
| 465<br>4 | TATA-Box Binding Protein Associated Factor 7                          | TAF7     |  | GeneCard |          |
| 465<br>5 | TAFA Chemokine Like Family Member 5                                   | TAFA5    |  | GeneCard |          |
| 465<br>6 | Tafazzin, Phospholipid-Lysophospholipid Transacylase                  | TAFAZZIN |  | GeneCard |          |
| 465<br>7 | Transgelin                                                            | TAGLN    |  | GeneCard | DisGenet |
| 465<br>8 | Transgelin 2                                                          | TAGLN2   |  | GeneCard |          |
| 465<br>9 | Myeloproliferative syndrome, transient                                | TAM      |  |          | DisGenet |
| 466<br>0 | Tetratricopeptide Repeat, Ankyrin Repeat And Coiled-Coil Containing 1 | TANC1    |  | GeneCard |          |
| 466<br>1 | TRAF Family Member Associated NFKB Activator                          | TANK     |  | GeneCard |          |
| 466<br>2 | Transporter 2, ATP Binding Cassette Subfamily B Member                | TAP2     |  | GeneCard |          |
| 466<br>3 | TAR DNA Binding Protein                                               | TARDBP   |  | GeneCard |          |
| 466<br>4 | TCR Gamma Alternate Reading Frame Protein                             | TARP     |  | GeneCard |          |

|          |                                                    |         |  |          |          |
|----------|----------------------------------------------------|---------|--|----------|----------|
| 466<br>5 | Taste 2 Receptor Member 50                         | TAS2R50 |  | GeneCard |          |
| 466<br>6 | TLR Adaptor Interacting With Endolysosomal SLC15A4 | TASL    |  | GeneCard |          |
| 466<br>7 | Tyrosine Aminotransferase                          | TAT     |  | GeneCard |          |
| 466<br>8 | Tafazzin                                           | TAZ     |  |          | DisGenet |
| 466<br>9 | TBC1 Domain Family Member 1                        | TBC1D1  |  | GeneCard |          |
| 467<br>0 | TBC1 Domain Family Member 4                        | TBC1D4  |  | GeneCard |          |
| 467<br>1 | Tubulin Folding Cofactor A Pseudogene 1            | TBCAP1  |  | GeneCard |          |
| 467<br>2 | TANK Binding Kinase 1                              | TBK1    |  | GeneCard |          |
| 467<br>3 | TBL1X/Y Related 1                                  | TBL1XR1 |  | GeneCard |          |
| 467<br>4 | TATA-Box Binding Protein Like 2                    | TBPL2   |  |          | DisGenet |
| 467<br>5 | Transforming Growth Factor Beta Regulator 1        | TBRG1   |  | GeneCard |          |
| 467<br>6 | T-Box Transcription Factor 18                      | TBX18   |  | GeneCard | DisGenet |
| 467<br>7 | T-Box Transcription Factor 20                      | TBX20   |  | GeneCard | DisGenet |
| 467<br>8 | T-Box Transcription Factor 21                      | TBX21   |  | GeneCard |          |
| 467<br>9 | T-Box Transcription Factor 4                       | TBX4    |  | GeneCard |          |
| 468<br>0 | T-Box Transcription Factor 5                       | TBX5    |  | GeneCard |          |
| 468<br>1 | Thromboxane A2 Receptor                            | TBXA2R  |  | GeneCard | DisGenet |
| 468<br>2 | Thromboxane A Synthase 1                           | TBXAS1  |  | GeneCard | DisGenet |
| 468<br>3 | T-Box Transcription Factor T                       | TBXT    |  | GeneCard |          |
| 468<br>4 | Titin-Cap                                          | TCAP    |  | GeneCard |          |

|          |                                                                 |         |  |          |          |
|----------|-----------------------------------------------------------------|---------|--|----------|----------|
| 468<br>5 | Transcription Elongation Factor A1                              | TCEA1   |  | GeneCard |          |
| 468<br>6 | Transcription Elongation Factor A3                              | TCEA3   |  | GeneCard |          |
| 468<br>7 | Transcription Factor 15                                         | TCF15   |  |          | DisGenet |
| 468<br>8 | Transcription Factor 21                                         | TCF21   |  | GeneCard | DisGenet |
| 468<br>9 | Transcription Factor 4                                          | TCF4    |  | GeneCard |          |
| 469<br>0 | Transcription Factor 7                                          | TCF7    |  | GeneCard |          |
| 469<br>1 | Transcription Factor 7 Like 2                                   | TCF7L2  |  | GeneCard | DisGenet |
| 469<br>2 | T Cell Immune Regulator 1, ATPase H+ Transporting V0 Subunit A3 | TCIRG1  |  | GeneCard | DisGenet |
| 469<br>3 | Transcobalamin 1                                                | TCN1    |  | GeneCard |          |
| 469<br>4 | Transcobalamin 2                                                | TCN2    |  | GeneCard |          |
| 469<br>5 | T-Complex 1                                                     | TCP1    |  | GeneCard |          |
| 469<br>6 | T-Complex 11 Like 1                                             | TCP11L1 |  | GeneCard |          |
| 469<br>7 | Tryptophan 2,3-Dioxygenase                                      | TDO2    |  |          | DisGenet |
| 469<br>8 | Tudor Domain Containing 9                                       | TDRD9   |  |          | DisGenet |
| 469<br>9 | TEA Domain Transcription Factor 1                               | TEAD1   |  | GeneCard |          |
| 470<br>0 | TEK Receptor Tyrosine Kinase                                    | TEK     |  | GeneCard | DisGenet |
| 470<br>1 | Teneurin Transmembrane Protein 2                                | TENM2   |  | GeneCard |          |
| 470<br>2 | Terminal Nucleotidyltransferase 4B                              | TENT4B  |  | GeneCard |          |
| 470<br>3 | Telomerase RNA Component                                        | TERC    |  | GeneCard |          |
| 470<br>4 | Telomeric Repeat Binding Factor 1                               | TERF1   |  | GeneCard |          |

|          |                                       |         |      |          |          |
|----------|---------------------------------------|---------|------|----------|----------|
| 470<br>5 | Telomeric Repeat Binding Factor 2     | TERF2   |      | GeneCard |          |
| 470<br>6 | TERF2 Interacting Protein             | TERF2IP |      | GeneCard |          |
| 470<br>7 | Telomerase Reverse Transcriptase      | TERT    |      | GeneCard |          |
| 470<br>8 | Testin LIM Domain Protein             | TES     |      | GeneCard |          |
| 470<br>9 | Tescalcin                             | TESC    |      |          | DisGenet |
| 471<br>0 | Tet Methylcytosine Dioxygenase 2      | TET2    | OMIM | GeneCard | DisGenet |
| 471<br>1 | Tet Methylcytosine Dioxygenase 3      | TET3    |      |          | DisGenet |
| 471<br>2 | Transferrin                           | TF      |      | GeneCard |          |
| 471<br>3 | Transcription Factor A, Mitochondrial | TFAM    |      | GeneCard | DisGenet |
| 471<br>4 | Transcription Factor AP-2 Alpha       | TFAP2A  |      | GeneCard |          |
| 471<br>5 | Transcription Factor AP-2 Beta        | TFAP2B  |      | GeneCard |          |
| 471<br>6 | Transcription Factor CP2              | TFCP2   |      | GeneCard |          |
| 471<br>7 | Transcription Factor EB               | TFEB    |      | GeneCard | DisGenet |
| 471<br>8 | Trefoil Factor 3                      | TFF3    |      | GeneCard |          |
| 471<br>9 | Tissue Factor Pathway Inhibitor       | TFPI    |      | GeneCard | DisGenet |
| 472<br>0 | Tissue Factor Pathway Inhibitor 2     | TFPI2   |      | GeneCard | DisGenet |
| 472<br>1 | TCF3 Fusion Partner                   | TFPT    |      | GeneCard |          |
| 472<br>2 | Transferrin Receptor                  | TFRC    |      | GeneCard | DisGenet |
| 472<br>3 | Thyroglobulin                         | TG      |      | GeneCard |          |
| 472<br>4 | Transforming Growth Factor Alpha      | TGFA    |      | GeneCard |          |

|          |                                                        |         |  |          |          |
|----------|--------------------------------------------------------|---------|--|----------|----------|
| 472<br>5 | Transforming Growth Factor Beta 1                      | TGFB1   |  | GeneCard | DisGenet |
| 472<br>6 | Transforming Growth Factor Beta 1 Induced Transcript 1 | TGFB1I1 |  | GeneCard | DisGenet |
| 472<br>7 | Transforming Growth Factor Beta 2                      | TGFB2   |  | GeneCard | DisGenet |
| 472<br>8 | Transforming Growth Factor Beta 3                      | TGFB3   |  | GeneCard |          |
| 472<br>9 | Transforming Growth Factor Beta Induced                | TGFB1   |  | GeneCard | DisGenet |
| 473<br>0 | Transforming Growth Factor Beta Receptor 1             | TGFBR1  |  | GeneCard |          |
| 473<br>1 | Transforming Growth Factor Beta Receptor 2             | TGFBR2  |  | GeneCard |          |
| 473<br>2 | Transforming Growth Factor Beta Receptor 3             | TGFBR3  |  | GeneCard | DisGenet |
| 473<br>3 | TGFB Induced Factor Homeobox 1                         | TGIF1   |  | GeneCard |          |
| 473<br>4 | Transglutaminase 2                                     | TGM2    |  | GeneCard | DisGenet |
| 473<br>5 | Trimethylguanosine Synthase 1                          | TGS1    |  | GeneCard |          |
| 473<br>6 | Tyrosine Hydroxylase                                   | TH      |  | GeneCard |          |
| 473<br>7 | Thrombomodulin                                         | THBD    |  | GeneCard | DisGenet |
| 473<br>8 | Thrombospondin 1                                       | THBS1   |  | GeneCard | DisGenet |
| 473<br>9 | Thrombospondin 2                                       | THBS2   |  | GeneCard |          |
| 474<br>0 | Thrombospondin 4                                       | THBS4   |  | GeneCard | DisGenet |
| 474<br>1 | Thioesterase Superfamily Member 4                      | THEM4   |  | GeneCard |          |
| 474<br>2 | Thymoma                                                | THM     |  |          | DisGenet |
| 474<br>3 | THO Complex 5                                          | THOC5   |  | GeneCard |          |
| 474<br>4 | Thrombopoietin                                         | THPO    |  | GeneCard |          |

|          |                                                                 |          |      |          |          |
|----------|-----------------------------------------------------------------|----------|------|----------|----------|
| 474<br>5 | Thyroid Hormone Receptor Beta                                   | THRB     |      | GeneCard |          |
| 474<br>6 | Thrombospondin Type 1 Domain Containing 1                       | THSD1    | OMIM | GeneCard |          |
| 474<br>7 | Thrombospondin Type 1 Domain Containing 4                       | THSD4    |      | GeneCard |          |
| 474<br>8 | Thrombospondin Type 1 Domain Containing 7A                      | THSD7A   |      | GeneCard |          |
| 474<br>9 | Thy-1 Cell Surface Antigen                                      | THY1     |      |          | DisGenet |
| 475<br>0 | TIA1 Cytotoxic Granule Associated RNA Binding Protein           | TIA1     |      | GeneCard |          |
| 475<br>1 | TIAM Rac1 Associated GEF 1                                      | TIAM1    |      | GeneCard |          |
| 475<br>2 | TIR Domain Containing Adaptor Molecule 1                        | TICAM1   |      | GeneCard |          |
| 475<br>3 | Toll Like Receptor Adaptor Molecule 2                           | TICAM2   |      |          | DisGenet |
| 475<br>4 | Tyrosine Kinase With Immunoglobulin Like And EGF Like Domains 1 | TIE1     |      | GeneCard | DisGenet |
| 475<br>5 | Timeless Circadian Regulator                                    | TIMELESS |      |          | DisGenet |
| 475<br>6 | TIMP Metallopeptidase Inhibitor 1                               | TIMP1    |      | GeneCard | DisGenet |
| 475<br>7 | TIMP Metallopeptidase Inhibitor 2                               | TIMP2    |      | GeneCard |          |
| 475<br>8 | TIMP Metallopeptidase Inhibitor 3                               | TIMP3    |      | GeneCard | DisGenet |
| 475<br>9 | TIMP Metallopeptidase Inhibitor 4                               | TIMP4    |      | GeneCard |          |
| 476<br>0 | TIMELESS Interacting Protein                                    | TIPIN    |      | GeneCard |          |
| 476<br>1 | Tight Junction Protein 1                                        | TJP1     |      | GeneCard |          |
| 476<br>2 | Transketolase                                                   | TKT      |      | GeneCard |          |
| 476<br>3 | Tousled Like Kinase 1                                           | TLK1     |      | GeneCard |          |
| 476<br>4 | Tolloid Like 1                                                  | TLL1     |      | GeneCard |          |



|          |                                                |         |      |          |          |
|----------|------------------------------------------------|---------|------|----------|----------|
| 476<br>5 | Talin 1                                        | TLN1    |      | GeneCard |          |
| 476<br>6 | Talin 2                                        | TLN2    |      | GeneCard |          |
| 476<br>7 | Toll Like Receptor 1                           | TLR1    |      | GeneCard | DisGenet |
| 476<br>8 | Toll Like Receptor 10                          | TLR10   |      | GeneCard |          |
| 476<br>9 | Toll Like Receptor 2                           | TLR2    | OMIM | GeneCard | DisGenet |
| 477<br>0 | Toll Like Receptor 3                           | TLR3    |      | GeneCard | DisGenet |
| 477<br>1 | Toll Like Receptor 4                           | TLR4    | OMIM | GeneCard | DisGenet |
| 477<br>2 | Toll Like Receptor 5                           | TLR5    |      | GeneCard | DisGenet |
| 477<br>3 | Toll Like Receptor 6                           | TLR6    |      | GeneCard | DisGenet |
| 477<br>4 | Toll Like Receptor 7                           | TLR7    |      | GeneCard | DisGenet |
| 477<br>5 | Toll Like Receptor 8                           | TLR8    |      | GeneCard | DisGenet |
| 477<br>6 | Toll Like Receptor 9                           | TLR9    |      | GeneCard | DisGenet |
| 477<br>7 | TLX1 Neighbor                                  | TLX1NB  |      |          | DisGenet |
| 477<br>8 | Transmembrane 4 L Six Family Member 19         | TM4SF19 |      | GeneCard |          |
| 477<br>9 | Transmembrane 4 L Six Family Member 5          | TM4SF5  |      | GeneCard |          |
| 478<br>0 | Transmembrane 6 Superfamily Member 2           | TM6SF2  |      | GeneCard | DisGenet |
| 478<br>1 | Transmembrane 7 Superfamily Member 2           | TM7SF2  |      |          | DisGenet |
| 478<br>2 | Transmembrane BAX Inhibitor Motif Containing 1 | TMBIM1  | OMIM | GeneCard |          |
| 478<br>3 | Transmembrane And Coiled-Coil Domains 1        | TMCO1   |      | GeneCard |          |
| 478<br>4 | Transmembrane And Coiled-Coil Domains 5A       | TMCO5A  |      | GeneCard |          |

|          |                                                       |              |  |          |          |
|----------|-------------------------------------------------------|--------------|--|----------|----------|
| 478<br>5 | Transmembrane And Coiled-Coil Domains 5B (Pseudogene) | TMCO5B       |  | GeneCard |          |
| 478<br>6 | Transmembrane p24 Trafficking Protein 7               | TMED7        |  |          | DisGenet |
| 478<br>7 | TMED7-TICAM2 readthrough                              | TMED7-TICAM2 |  |          | DisGenet |
| 478<br>8 | Transmembrane Protein 106B                            | TMEM106B     |  | GeneCard |          |
| 478<br>9 | Transmembrane Protein 132B                            | TMEM132B     |  | GeneCard |          |
| 479<br>0 | Transmembrane Protein 150B                            | TMEM150B     |  | GeneCard |          |
| 479<br>1 | Transmembrane Protein 161B                            | TMEM161B     |  | GeneCard |          |
| 479<br>2 | Transmembrane Protein 170A                            | TMEM170A     |  | GeneCard |          |
| 479<br>3 | Transmembrane Protein 18                              | TMEM18       |  | GeneCard | DisGenet |
| 479<br>4 | Transmembrane Protein 199                             | TMEM199      |  | GeneCard |          |
| 479<br>5 | Transmembrane Protein 248 Pseudogene 1                | TMEM248P1    |  | GeneCard |          |
| 479<br>6 | Transmembrane Protein 258                             | TMEM258      |  | GeneCard |          |
| 479<br>7 | Transmembrane Protein 43                              | TMEM43       |  | GeneCard |          |
| 479<br>8 | Transmembrane Protein 59                              | TMEM59       |  | GeneCard |          |
| 479<br>9 | Transmembrane Protein 68                              | TMEM68       |  | GeneCard |          |
| 480<br>0 | Transmembrane Protein 97                              | TMEM97       |  | GeneCard |          |
| 480<br>1 | Transmembrane Protein 98                              | TMEM98       |  |          | DisGenet |
| 480<br>2 | Thymopoietin                                          | TMPO         |  | GeneCard |          |
| 480<br>3 | Transmembrane Serine Protease 6                       | TMPRSS6      |  | GeneCard |          |
| 480<br>4 | Thymosin Beta 10                                      | TMSB10       |  | GeneCard | DisGenet |

|          |                                                           |           |      |          |          |
|----------|-----------------------------------------------------------|-----------|------|----------|----------|
| 480<br>5 | Thymosin Beta 4 X-Linked                                  | TMSB4X    |      | GeneCard |          |
| 480<br>6 | Transmembrane O-Mannosyltransferase Targeting Cadherins 1 | TMTC1     |      | GeneCard |          |
| 480<br>7 | Tenascin C                                                | TNC       |      | GeneCard | DisGenet |
| 480<br>8 | Tumor Necrosis Factor                                     | TNF       |      | GeneCard | DisGenet |
| 480<br>9 | TNF Alpha Induced Protein 1                               | TNFAIP1   |      | GeneCard |          |
| 481<br>0 | TNF Alpha Induced Protein 3                               | TNFAIP3   | OMIM | GeneCard |          |
| 481<br>1 | TNF Alpha Induced Protein 6                               | TNFAIP6   |      | GeneCard | DisGenet |
| 481<br>2 | TNF Alpha Induced Protein 8                               | TNFAIP8   | OMIM | GeneCard |          |
| 481<br>3 | TNF Alpha Induced Protein 8 Like 1                        | TNFAIP8L1 |      | GeneCard | DisGenet |
| 481<br>4 | TNF Alpha Induced Protein 8 Like 2                        | TNFAIP8L2 |      |          | DisGenet |
| 481<br>5 | TNF Receptor Superfamily Member 10a                       | TNFRSF10A |      | GeneCard |          |
| 481<br>6 | TNF Receptor Superfamily Member 10b                       | TNFRSF10B |      | GeneCard |          |
| 481<br>7 | TNF Receptor Superfamily Member 10c                       | TNFRSF10C |      | GeneCard |          |
| 481<br>8 | TNF Receptor Superfamily Member 11a                       | TNFRSF11A |      | GeneCard | DisGenet |
| 481<br>9 | TNF Receptor Superfamily Member 11b                       | TNFRSF11B | OMIM | GeneCard | DisGenet |
| 482<br>0 | TNF Receptor Superfamily Member 12A                       | TNFRSF12A |      | GeneCard | DisGenet |
| 482<br>1 | TNF Receptor Superfamily Member 13B                       | TNFRSF13B |      | GeneCard |          |
| 482<br>2 | TNF Receptor Superfamily Member 13C                       | TNFRSF13C |      | GeneCard | DisGenet |
| 482<br>3 | TNF Receptor Superfamily Member 14                        | TNFRSF14  |      | GeneCard | DisGenet |
| 482<br>4 | TNF Receptor Superfamily Member 17                        | TNFRSF17  |      | GeneCard |          |

|          |                                    |                 |      |          |          |
|----------|------------------------------------|-----------------|------|----------|----------|
| 482<br>5 | TNF Receptor Superfamily Member 18 | TNFRSF18        |      | GeneCard |          |
| 482<br>6 | TNF Receptor Superfamily Member 1A | TNFRSF1A        | OMIM | GeneCard | DisGenet |
| 482<br>7 | TNF Receptor Superfamily Member 1B | TNFRSF1B        |      | GeneCard | DisGenet |
| 482<br>8 | TNF Receptor Superfamily Member 25 | TNFRSF25        |      | GeneCard | DisGenet |
| 482<br>9 | TNF Receptor Superfamily Member 4  | TNFRSF4         |      | GeneCard | DisGenet |
| 483<br>0 | TNF Receptor Superfamily Member 6b | TNFRSF6B        |      | GeneCard | DisGenet |
| 483<br>1 | TNF Receptor Superfamily Member 9  | TNFRSF9         |      | GeneCard | DisGenet |
| 483<br>2 | TNF Superfamily Member 10          | TNFSF10         |      | GeneCard | DisGenet |
| 483<br>3 | TNF Superfamily Member 11          | TNFSF11         |      | GeneCard | DisGenet |
| 483<br>4 | TNF Superfamily Member 12          | TNFSF12         |      | GeneCard | DisGenet |
| 483<br>5 | TNFSF12-TNFSF13 readthrough        | TNFSF12-TNFSF13 |      |          | DisGenet |
| 483<br>6 | TNF Superfamily Member 13          | TNFSF13         |      | GeneCard | DisGenet |
| 483<br>7 | TNF Superfamily Member 13b         | TNFSF13B        |      | GeneCard | DisGenet |
| 483<br>8 | TNF Superfamily Member 14          | TNFSF14         |      | GeneCard | DisGenet |
| 483<br>9 | TNF Superfamily Member 15          | TNFSF15         |      | GeneCard | DisGenet |
| 484<br>0 | TNF Superfamily Member 4           | TNFSF4          | OMIM | GeneCard | DisGenet |
| 484<br>1 | TNF Superfamily Member 9           | TNFSF9          |      | GeneCard | DisGenet |
| 484<br>2 | TNFAIP3 Interacting Protein 1      | TNIP1           |      | GeneCard |          |
| 484<br>3 | TNFAIP3 Interacting Protein 3      | TNIP3           |      | GeneCard |          |
| 484<br>4 | Tankyrase                          | TNKS            |      | GeneCard |          |

|          |                                                                |        |  |          |          |
|----------|----------------------------------------------------------------|--------|--|----------|----------|
| 484<br>5 | Troponin C1, Slow Skeletal And Cardiac Type                    | TNNC1  |  | GeneCard |          |
| 484<br>6 | Troponin C2, Fast Skeletal Type                                | TNNC2  |  | GeneCard |          |
| 484<br>7 | Troponin I1, Slow Skeletal Type                                | TNNI1  |  | GeneCard |          |
| 484<br>8 | Troponin I2, Fast Skeletal Type                                | TNNI2  |  | GeneCard |          |
| 484<br>9 | Troponin I3, Cardiac Type                                      | TNNI3  |  | GeneCard | DisGenet |
| 485<br>0 | TNNI3 Interacting Kinase                                       | TNNI3K |  | GeneCard |          |
| 485<br>1 | Troponin T1, Slow Skeletal Type                                | TNNT1  |  | GeneCard |          |
| 485<br>2 | Troponin T2, Cardiac Type                                      | TNNT2  |  | GeneCard | DisGenet |
| 485<br>3 | Transportin 1                                                  | TNPO1  |  | GeneCard |          |
| 485<br>4 | Tenascin R                                                     | TNR    |  | GeneCard |          |
| 485<br>5 | Tenascin XA (Pseudogene)                                       | TNXA   |  | GeneCard |          |
| 485<br>6 | Tenascin XB                                                    | TNXB   |  | GeneCard |          |
| 485<br>7 | Toll Interacting Protein                                       | TOLLIP |  | GeneCard | DisGenet |
| 485<br>8 | Translocase Of Outer Mitochondrial Membrane 40                 | TOMM40 |  | GeneCard |          |
| 485<br>9 | Tonsoku Like, DNA Repair Protein                               | TONSL  |  | GeneCard |          |
| 486<br>0 | DNA Topoisomerase I                                            | TOP1   |  | GeneCard |          |
| 486<br>1 | TOP1 Binding Arginine/Serine Rich Protein, E3 Ubiquitin Ligase | TOPORS |  | GeneCard |          |
| 486<br>2 | Torsin Family 1 Member A                                       | TOR1A  |  | GeneCard |          |
| 486<br>3 | Torsin Family 2 Member A                                       | TOR2A  |  | GeneCard | DisGenet |
| 486<br>4 | Thymocyte Selection Associated High Mobility Group Box         | TOX    |  | GeneCard |          |

|          |                                              |          |  |          |          |
|----------|----------------------------------------------|----------|--|----------|----------|
| 486<br>5 | TOX High Mobility Group Box Family Member 3  | TOX3     |  | GeneCard |          |
| 486<br>6 | Tumor Protein P53                            | TP53     |  | GeneCard | DisGenet |
| 486<br>7 | Tumor Protein P53 Pathway Corepressor 1      | TP53COR1 |  | GeneCard | DisGenet |
| 486<br>8 | Tumor Protein P63                            | TP63     |  | GeneCard | DisGenet |
| 486<br>9 | Tumor Protein P73                            | TP73     |  | GeneCard | DisGenet |
| 487<br>0 | TP73 Antisense RNA 1                         | TP73-AS1 |  | GeneCard |          |
| 487<br>1 | Tumor Protein D52                            | TPD52    |  | GeneCard |          |
| 487<br>2 | TPD52 Like 3                                 | TPD52L3  |  | GeneCard |          |
| 487<br>3 | Tryptophan Hydroxylase 1                     | TPH1     |  | GeneCard | DisGenet |
| 487<br>4 | Triosephosphate Isomerase 1                  | TPI1     |  |          | DisGenet |
| 487<br>5 | Tropomyosin 1                                | TPM1     |  | GeneCard |          |
| 487<br>6 | Tropomyosin 2                                | TPM2     |  | GeneCard | DisGenet |
| 487<br>7 | Thyroid Peroxidase                           | TPO      |  | GeneCard | DisGenet |
| 487<br>8 | Transmembrane Protein Adipocyte Associated 1 | TPRA1    |  | GeneCard |          |
| 487<br>9 | Tryptase Alpha/Beta 1                        | TPSAB1   |  | GeneCard |          |
| 488<br>0 | Tyrosylprotein Sulfotransferase 1            | TPST1    |  | GeneCard |          |
| 488<br>1 | Tyrosylprotein Sulfotransferase 2            | TPST2    |  | GeneCard |          |
| 488<br>2 | Tumor Protein, Translationally-Controlled 1  | TPT1     |  |          | DisGenet |
| 488<br>3 | T Cell Receptor Alpha Locus                  | TRA      |  | GeneCard |          |
| 488<br>4 | TNFRSF1A Associated Via Death Domain         | TRADD    |  | GeneCard |          |

|          |                                                         |             |  |          |          |
|----------|---------------------------------------------------------|-------------|--|----------|----------|
| 488<br>5 | TNF Receptor Associated Factor 1                        | TRAF1       |  | GeneCard | DisGenet |
| 488<br>6 | TNF Receptor Associated Factor 2                        | TRAF2       |  | GeneCard | DisGenet |
| 488<br>7 | TNF Receptor Associated Factor 3                        | TRAF3       |  | GeneCard |          |
| 488<br>8 | TRAF3 Interacting Protein 2                             | TRAF3IP2    |  |          | DisGenet |
| 488<br>9 | TNF Receptor Associated Factor 4                        | TRAF4       |  | GeneCard | DisGenet |
| 489<br>0 | TNF Receptor Associated Factor 6                        | TRAF6       |  | GeneCard | DisGenet |
| 489<br>1 | TNF Receptor Associated Factor 7                        | TRAF7       |  | GeneCard |          |
| 489<br>2 | Trafficking Kinesin Protein 2                           | TRAK2       |  | GeneCard |          |
| 489<br>3 | Translocation Associated Membrane Protein 1             | TRAM1       |  | GeneCard | DisGenet |
| 489<br>4 | T Cell Receptor Associated Transmembrane Adaptor 1      | TRAT1       |  |          | DisGenet |
| 489<br>5 | T Cell Receptor Beta Locus                              | TRB         |  | GeneCard |          |
| 489<br>6 | T cell receptor beta variable 20/OR9-2 (non-functional) | TRBV20OR9-2 |  |          | DisGenet |
| 489<br>7 | T Cell Receptor Delta Locus                             | TRD         |  | GeneCard |          |
| 489<br>8 | Triadin                                                 | TRDN        |  | GeneCard |          |
| 489<br>9 | Trehalase                                               | TREH        |  | GeneCard |          |
| 490<br>0 | Triggering Receptor Expressed On Myeloid Cells 1        | TREM1       |  | GeneCard | DisGenet |
| 490<br>1 | Triggering Receptor Expressed On Myeloid Cells 2        | TREM2       |  | GeneCard |          |
| 490<br>2 | Triggering Receptor Expressed On Myeloid Cells Like 1   | TREML1      |  | GeneCard |          |
| 490<br>3 | Triggering Receptor Expressed On Myeloid Cells Like 4   | TREML4      |  | GeneCard |          |
| 490<br>4 | Three Prime Repair Exonuclease 1                        | TREX1       |  | GeneCard |          |

|          |                                                |        |  |          |          |
|----------|------------------------------------------------|--------|--|----------|----------|
| 490<br>5 | T Cell Receptor Gamma Locus                    | TRG    |  | GeneCard |          |
| 490<br>6 | Thyrotropin Releasing Hormone                  | TRH    |  | GeneCard |          |
| 490<br>7 | Thyrotropin Releasing Hormone Degrading Enzyme | TRHDE  |  | GeneCard |          |
| 490<br>8 | Tribbles Pseudokinase 1                        | TRIB1  |  | GeneCard |          |
| 490<br>9 | Tribbles Pseudokinase 2                        | TRIB2  |  | GeneCard |          |
| 491<br>0 | Tribbles Pseudokinase 3                        | TRIB3  |  | GeneCard | DisGenet |
| 491<br>1 | Tripartite Motif Containing 10                 | TRIM10 |  | GeneCard |          |
| 491<br>2 | Tripartite Motif Containing 11                 | TRIM11 |  | GeneCard |          |
| 491<br>3 | Tripartite Motif Containing 13                 | TRIM13 |  |          | DisGenet |
| 491<br>4 | Tripartite Motif Containing 14                 | TRIM14 |  | GeneCard | DisGenet |
| 491<br>5 | Tripartite Motif Containing 15                 | TRIM15 |  | GeneCard |          |
| 491<br>6 | Tripartite Motif Containing 21                 | TRIM21 |  | GeneCard | DisGenet |
| 491<br>7 | Tripartite Motif Containing 24                 | TRIM24 |  | GeneCard |          |
| 491<br>8 | Tripartite Motif Containing 26                 | TRIM26 |  | GeneCard |          |
| 491<br>9 | Tripartite Motif Containing 27                 | TRIM27 |  | GeneCard |          |
| 492<br>0 | Tripartite Motif Containing 28                 | TRIM28 |  | GeneCard | DisGenet |
| 492<br>1 | Tripartite Motif Containing 31                 | TRIM31 |  | GeneCard |          |
| 492<br>2 | Tripartite Motif Containing 40                 | TRIM40 |  | GeneCard |          |
| 492<br>3 | Tripartite Motif Containing 63                 | TRIM63 |  | GeneCard |          |
| 492<br>4 | Tripartite Motif Containing 68                 | TRIM68 |  | GeneCard |          |



|          |                                                                                     |            |  |          |          |
|----------|-------------------------------------------------------------------------------------|------------|--|----------|----------|
| 492<br>5 | Tripartite Motif Containing 7                                                       | TRIM7      |  | GeneCard |          |
| 492<br>6 | Tripartite Motif Containing 9                                                       | TRIM9      |  | GeneCard |          |
| 492<br>7 | tRNA-Leu (anticodon TAG) 1-1                                                        | TRL-TAG1-1 |  |          | DisGenet |
| 492<br>8 | tRNA                                                                                | TRNL1      |  |          | DisGenet |
| 492<br>9 | tRNA                                                                                | TRNL2      |  |          | DisGenet |
| 493<br>0 | Transient Receptor Potential Cation Channel Subfamily A Member 1                    | TRPA1      |  | GeneCard | DisGenet |
| 493<br>1 | Transient Receptor Potential Cation Channel Subfamily C Member 1                    | TRPC1      |  | GeneCard | DisGenet |
| 493<br>2 | Transient Receptor Potential Cation Channel Subfamily C Member 3                    | TRPC3      |  | GeneCard | DisGenet |
| 493<br>3 | Transient Receptor Potential Cation Channel Subfamily C Member 4                    | TRPC4      |  | GeneCard |          |
| 493<br>4 | Transient Receptor Potential Cation Channel Subfamily C Member 4 Associated Protein | TRPC4AP    |  | GeneCard |          |
| 493<br>5 | Transient Receptor Potential Cation Channel Subfamily C Member 5                    | TRPC5      |  | GeneCard | DisGenet |
| 493<br>6 | Transient Receptor Potential Cation Channel Subfamily C Member 6                    | TRPC6      |  | GeneCard | DisGenet |
| 493<br>7 | Transient Receptor Potential Cation Channel Subfamily M Member 1                    | TRPM1      |  | GeneCard |          |
| 493<br>8 | Transient Receptor Potential Cation Channel Subfamily M Member 2                    | TRPM2      |  | GeneCard |          |
| 493<br>9 | Transient Receptor Potential Cation Channel Subfamily M Member 3                    | TRPM3      |  | GeneCard |          |
| 494<br>0 | Transient Receptor Potential Cation Channel Subfamily M Member 6                    | TRPM6      |  | GeneCard | DisGenet |
| 494<br>1 | Transient Receptor Potential Cation Channel Subfamily M Member 7                    | TRPM7      |  | GeneCard |          |
| 494<br>2 | Transcriptional Repressor GATA Binding 1                                            | TRPS1      |  | GeneCard |          |
| 494<br>3 | Transient Receptor Potential Cation Channel Subfamily V Member 1                    | TRPV1      |  | GeneCard | DisGenet |
| 494<br>4 | Transient Receptor Potential Cation Channel Subfamily V Member 2                    | TRPV2      |  | GeneCard |          |

|          |                                                                  |             |      |          |          |
|----------|------------------------------------------------------------------|-------------|------|----------|----------|
| 494<br>5 | Transient Receptor Potential Cation Channel Subfamily V Member 4 | TRPV4       |      | GeneCard | DisGenet |
| 494<br>6 | Transient Receptor Potential Cation Channel Subfamily V Member 5 | TRPV5       |      |          | DisGenet |
| 494<br>7 | Transient Receptor Potential Cation Channel Subfamily V Member 6 | TRPV6       |      | GeneCard |          |
| 494<br>8 | Testis Expressed Basic Protein 1                                 | TSBP1       |      | GeneCard |          |
| 494<br>9 | TSC Complex Subunit 1                                            | TSC1        |      | GeneCard | DisGenet |
| 495<br>0 | TSC Complex Subunit 2                                            | TSC2        |      | GeneCard |          |
| 495<br>1 | Ts Translation Elongation Factor, Mitochondrial                  | TSFM        |      | GeneCard |          |
| 495<br>2 | Thyroid Stimulating Hormone Subunit Beta                         | TSHB        |      | GeneCard |          |
| 495<br>3 | Tsukushi, Small Leucine Rich Proteoglycan                        | TSKU        |      | GeneCard |          |
| 495<br>4 | Thymic Stromal Lymphopoietin                                     | TSLP        |      | GeneCard | DisGenet |
| 495<br>5 | Tetraspanin 16                                                   | TSPAN16     |      | GeneCard |          |
| 495<br>6 | Tetraspanin 2                                                    | TSPAN2      |      | GeneCard |          |
| 495<br>7 | Tetraspanin 31                                                   | TSPAN31     |      |          | DisGenet |
| 495<br>8 | Tetraspanin 32                                                   | TSPAN32     |      | GeneCard |          |
| 495<br>9 | Tetraspanin 6                                                    | TSPAN6      |      | GeneCard |          |
| 496<br>0 | Translocator Protein                                             | TSPO        |      | GeneCard | DisGenet |
| 496<br>1 | TSPOAP1, SUPT4H1 And RNF43 Antisense RNA 1                       | TSPOAP1-AS1 |      | GeneCard |          |
| 496<br>2 | Tetratricopeptide Repeat Domain 27                               | TTC27       |      | GeneCard |          |
| 496<br>3 | Tetratricopeptide Repeat Domain 39B                              | TTC39B      | OMIM | GeneCard |          |
| 496<br>4 | Transcription Termination Factor 2                               | TTF2        |      | GeneCard |          |

|          |                                                 |         |      |          |          |
|----------|-------------------------------------------------|---------|------|----------|----------|
| 496<br>5 | Tubulin Tyrosine Ligase Like 11                 | TTLL11  |      | GeneCard |          |
| 496<br>6 | Titin                                           | TTN     |      | GeneCard |          |
| 496<br>7 | TTN Antisense RNA 1                             | TTN-AS1 |      | GeneCard |          |
| 496<br>8 | Alpha Tocopherol Transfer Protein               | TPPA    | OMIM | GeneCard | DisGenet |
| 496<br>9 | Transthyretin                                   | TTR     |      | GeneCard | DisGenet |
| 497<br>0 | Tubulin Alpha 1b                                | TUBA1B  |      | GeneCard |          |
| 497<br>1 | Tubulin Alpha 4a                                | TUBA4A  |      | GeneCard |          |
| 497<br>2 | Tubulin Beta Class I                            | TUBB    |      | GeneCard |          |
| 497<br>3 | Tubulin Beta 4A Class IVa                       | TUBB4A  |      | GeneCard |          |
| 497<br>4 | Tu Translation Elongation Factor, Mitochondrial | TUFM    |      |          | DisGenet |
| 497<br>5 | Taurine Up-Regulated 1                          | TUG1    |      | GeneCard | DisGenet |
| 497<br>6 | Tumor Suppressor Candidate 1                    | TUSC1   |      | GeneCard |          |
| 497<br>7 | Tumor Suppressor Candidate 3                    | TUSC3   |      | GeneCard |          |
| 497<br>8 | Twist Family BHLH Transcription Factor 1        | TWIST1  |      | GeneCard | DisGenet |
| 497<br>9 | Twinkle MtDNA Helicase                          | TWINK   |      | GeneCard |          |
| 498<br>0 | Thioredoxin                                     | TXN     |      | GeneCard | DisGenet |
| 498<br>1 | Thioredoxin Domain-Containing Protein 5         | TXNDC5  | OMIM |          |          |
| 498<br>2 | Thioredoxin Interacting Protein                 | TXNIP   |      | GeneCard | DisGenet |
| 498<br>3 | Thioredoxin Like 4B                             | TXNL4B  |      | GeneCard |          |
| 498<br>4 | Thioredoxin Reductase 1                         | TXNRD1  |      | GeneCard | DisGenet |

|          |                                                                        |          |  |          |          |
|----------|------------------------------------------------------------------------|----------|--|----------|----------|
| 498<br>5 | Thioredoxin Reductase 2                                                | TXNRD2   |  | GeneCard | DisGenet |
| 498<br>6 | Tyrosine Kinase 2                                                      | TYK2     |  | GeneCard |          |
| 498<br>7 | Thymidine Phosphorylase                                                | TYMP     |  | GeneCard | DisGenet |
| 498<br>8 | Thymidylate Synthetase                                                 | TYMS     |  | GeneCard |          |
| 498<br>9 | TYRO3 Protein Tyrosine Kinase                                          | TYRO3    |  | GeneCard |          |
| 499<br>0 | Transmembrane Immune Signaling Adaptor TYROBP                          | TYROBP   |  | GeneCard | DisGenet |
| 499<br>1 | Ubiquitin Like Modifier Activating Enzyme 1                            | UBA1     |  | GeneCard |          |
| 499<br>2 | Ubiquitin A-52 Residue Ribosomal Protein Fusion Product 1              | UBA52    |  | GeneCard |          |
| 499<br>3 | Ubiquitin A-52 Residue Ribosomal Protein Fusion Product 1 Pseudogene 6 | UBA52P6  |  | GeneCard |          |
| 499<br>4 | UBA Domain Containing 2                                                | UBAC2    |  | GeneCard |          |
| 499<br>5 | Ubiquitin Conjugating Enzyme E2 D2                                     | UBE2D2   |  | GeneCard |          |
| 499<br>6 | Ubiquitin Conjugating Enzyme E2 I                                      | UBE2I    |  | GeneCard |          |
| 499<br>7 | Ubiquitin Conjugating Enzyme E2 K                                      | UBE2K    |  | GeneCard |          |
| 499<br>8 | Ubiquitin Conjugating Enzyme E2 L3                                     | UBE2L3   |  | GeneCard |          |
| 499<br>9 | UBE2Q2 Pseudogene 1                                                    | UBE2Q2P1 |  | GeneCard |          |
| 500<br>0 | Ubiquitin Conjugating Enzyme E2 Z                                      | UBE2Z    |  | GeneCard | DisGenet |
| 500<br>1 | Ubiquitination Factor E4A                                              | UBE4A    |  | GeneCard |          |
| 500<br>2 | UbiA Prenyltransferase Domain Containing 1                             | UBIAD1   |  | GeneCard |          |
| 500<br>3 | Ubiquitin Like Domain Containing CTD Phosphatase 1                     | UBLCP1   |  | GeneCard |          |
| 500<br>4 | Ubiquilin 2                                                            | UBQLN2   |  | GeneCard |          |

|          |                                                             |          |      |          |          |
|----------|-------------------------------------------------------------|----------|------|----------|----------|
| 500<br>5 | UBX Domain Protein 7                                        | UBXN7    |      | GeneCard |          |
| 500<br>6 | Urothelial Cancer Associated 1                              | UCA1     |      | GeneCard | DisGenet |
| 500<br>7 | Ubiquitin C-Terminal Hydrolase L1                           | UCHL1    |      | GeneCard |          |
| 500<br>8 | Upper Zone Of Growth Plate And Cartilage Matrix Associated  | UCMA     |      | GeneCard |          |
| 500<br>9 | Urocortin                                                   | UCN      |      | GeneCard |          |
| 501<br>0 | Uncoupling Protein 1                                        | UCP1     | OMIM | GeneCard | DisGenet |
| 501<br>1 | Uncoupling Protein 2                                        | UCP2     |      | GeneCard | DisGenet |
| 501<br>2 | Uncoupling Protein 3                                        | UCP3     |      | GeneCard |          |
| 501<br>3 | Ubiquitin Fold Modifier 1                                   | UFM1     |      | GeneCard | DisGenet |
| 501<br>4 | UDP-Glucose Ceramide Glucosyltransferase                    | UGCG     |      | GeneCard |          |
| 501<br>5 | UDP-Glucose 6-Dehydrogenase                                 | UGDH     |      | GeneCard |          |
| 501<br>6 | UDP Glucuronosyltransferase Family 1 Member A Complex Locus | UGT1A    |      | GeneCard |          |
| 501<br>7 | UDP Glucuronosyltransferase Family 1 Member A1              | UGT1A1   |      | GeneCard |          |
| 501<br>8 | UDP Glucuronosyltransferase Family 1 Member A10             | UGT1A10  |      | GeneCard |          |
| 501<br>9 | UDP Glucuronosyltransferase Family 1 Member A12, Pseudogene | UGT1A12P |      | GeneCard |          |
| 502<br>0 | UDP Glucuronosyltransferase Family 1 Member A3              | UGT1A3   |      | GeneCard |          |
| 502<br>1 | UDP Glucuronosyltransferase Family 1 Member A4              | UGT1A4   |      | GeneCard |          |
| 502<br>2 | UDP Glucuronosyltransferase Family 1 Member A5              | UGT1A5   |      | GeneCard |          |
| 502<br>3 | UDP Glucuronosyltransferase Family 1 Member A6              | UGT1A6   |      | GeneCard |          |
| 502<br>4 | UDP Glucuronosyltransferase Family 1 Member A7              | UGT1A7   |      | GeneCard |          |

|          |                                                                  |          |      |          |          |
|----------|------------------------------------------------------------------|----------|------|----------|----------|
| 502<br>5 | UDP Glucuronosyltransferase Family 1 Member A8                   | UGT1A8   |      | GeneCard |          |
| 502<br>6 | UDP Glucuronosyltransferase Family 1 Member A9                   | UGT1A9   |      | GeneCard |          |
| 502<br>7 | UDP Glycosyltransferase Family 3 Member A1                       | UGT3A1   |      | GeneCard |          |
| 502<br>8 | Ubiquitin Like With PHD And Ring Finger Domains 2                | UHRF2    |      | GeneCard |          |
| 502<br>9 | Ubiquitin Interaction Motif Containing 1                         | UIMC1    |      | GeneCard |          |
| 503<br>0 | Unc-51 Like Kinase 4                                             | ULK4     |      | GeneCard |          |
| 503<br>1 | Uromodulin                                                       | UMOD     |      | GeneCard | DisGenet |
| 503<br>2 | Unc-13 Homolog C                                                 | UNC13C   |      | GeneCard |          |
| 503<br>3 | Unc-5 Netrin Receptor B                                          | UNC5B    |      | GeneCard | DisGenet |
| 503<br>4 | UNC Homeobox                                                     | UNCX     |      | GeneCard |          |
| 503<br>5 | Uracil-DNA Glycosylase Pseudogene 1                              | UNGP1    |      | GeneCard |          |
| 503<br>6 | URB1 Ribosome Biogenesis Homolog                                 | URB1     |      | GeneCard |          |
| 503<br>7 | URB2 Ribosome Biogenesis Homolog                                 | URB2     |      | GeneCard |          |
| 503<br>8 | Upstream Transcription Factor 1                                  | USF1     | OMIM | GeneCard | DisGenet |
| 503<br>9 | Upstream Transcription Factor 2, C-Fos Interacting               | USF2     |      | GeneCard |          |
| 504<br>0 | USO1 Vesicle Transport Factor                                    | USO1     |      | GeneCard |          |
| 504<br>1 | Ubiquitin Specific Peptidase 10                                  | USP10    |      | GeneCard |          |
| 504<br>2 | Ubiquitin Specific Peptidase 14                                  | USP14    |      | GeneCard |          |
| 504<br>3 | Ubiquitin Specific Peptidase 15                                  | USP15    |      | GeneCard |          |
| 504<br>4 | Ubiquitin Specific Peptidase 17 Like Family Member 9, Pseudogene | USP17L9P |      | GeneCard |          |

|          |                                          |       |      |          |          |
|----------|------------------------------------------|-------|------|----------|----------|
| 504<br>5 | Ubiquitin Specific Peptidase 20          | USP20 |      | GeneCard | DisGenet |
| 504<br>6 | Ubiquitin Specific Peptidase 24          | USP24 |      | GeneCard |          |
| 504<br>7 | Ubiquitin Specific Peptidase 3           | USP3  |      | GeneCard |          |
| 504<br>8 | Ubiquitin Specific Peptidase 7           | USP7  |      | GeneCard |          |
| 504<br>9 | UTP20 Small Subunit Processome Component | UTP20 |      | GeneCard |          |
| 505<br>0 | Utrophin                                 | UTRN  |      | GeneCard | DisGenet |
| 505<br>1 | Urotensin 2                              | UTS2  |      | GeneCard | DisGenet |
| 505<br>2 | Urotensin 2B                             | UTS2B |      | GeneCard | DisGenet |
| 505<br>3 | Urotensin 2 Receptor                     | UTS2R |      | GeneCard |          |
| 505<br>4 | UV Stimulated Scaffold Protein A         | UVSSA |      | GeneCard |          |
| 505<br>5 | Vesicle Associated Membrane Protein 3    | VAMP3 |      | GeneCard |          |
| 505<br>6 | Vesicle Associated Membrane Protein 8    | VAMP8 |      | GeneCard | DisGenet |
| 505<br>7 | Valyl-tRNA Synthetase 1                  | VARS1 |      |          | DisGenet |
| 505<br>8 | Vasohibin 1                              | VASH1 |      | GeneCard |          |
| 505<br>9 | Vasodilator Stimulated Phosphoprotein    | VASP  |      | GeneCard |          |
| 506<br>0 | Vav Guanine Nucleotide Exchange Factor 1 | VAV1  |      | GeneCard | DisGenet |
| 506<br>1 | Vav Guanine Nucleotide Exchange Factor 2 | VAV2  |      | GeneCard | DisGenet |
| 506<br>2 | Vav Guanine Nucleotide Exchange Factor 3 | VAV3  |      |          | DisGenet |
| 506<br>3 | Vascular cell adhesion molecule-1        | VCAM1 | OMIM | GeneCard | DisGenet |
| 506<br>4 | Versican                                 | VCAN  |      | GeneCard | DisGenet |

|          |                                                   |         |      |          |          |
|----------|---------------------------------------------------|---------|------|----------|----------|
| 506<br>5 | Vinculin                                          | VCL     |      | GeneCard | DisGenet |
| 506<br>6 | Valosin Containing Protein                        | VCP     |      | GeneCard |          |
| 506<br>7 | Vitamin D Receptor                                | VDR     |      | GeneCard | DisGenet |
| 506<br>8 | Vascular Endothelial Growth Factor A              | VEGFA   | OMIM | GeneCard | DisGenet |
| 506<br>9 | Vascular Endothelial Growth Factor B              | VEGFB   |      | GeneCard |          |
| 507<br>0 | Vascular Endothelial Growth Factor C              | VEGFC   |      | GeneCard |          |
| 507<br>1 | Vascular Endothelial Growth Factor D              | VEGFD   |      | GeneCard | DisGenet |
| 507<br>2 | VENT Homeobox Pseudogene 2                        | VENTXP2 |      | GeneCard |          |
| 507<br>3 | Ventricular Zone Expressed PH Domain Containing 1 | VEPH1   |      | GeneCard |          |
| 507<br>4 | Von Hippel-Lindau Tumor Suppressor                | VHL     |      | GeneCard |          |
| 507<br>5 | Vimentin                                          | VIM     |      | GeneCard | DisGenet |
| 507<br>6 | Vasoactive Intestinal Peptide                     | VIP     |      | GeneCard | DisGenet |
| 507<br>7 | Vitamin K Epoxide Reductase Complex Subunit 1     | VKORC1  |      | GeneCard | DisGenet |
| 507<br>8 | Very Low Density Lipoprotein Receptor             | VLDLR   |      | GeneCard | DisGenet |
| 507<br>9 | Vanin 1                                           | VNN1    |      |          | DisGenet |
| 508<br>0 | Vanin 3, Pseudogene                               | VNN3P   |      | GeneCard |          |
| 508<br>1 | VPS33A Core Subunit Of CORVET And HOPS Complexes  | VPS33A  |      | GeneCard |          |
| 508<br>2 | VPS41 Subunit Of HOPS Complex                     | VPS41   |      | GeneCard |          |
| 508<br>3 | VPS51 Subunit of GARP Complex                     | VPS51   |      |          | DisGenet |
| 508<br>4 | V-Set and Immunoglobulin Domain Containing 4      | VSIG4   |      | GeneCard |          |



|          |                                                     |          |      |          |          |
|----------|-----------------------------------------------------|----------|------|----------|----------|
| 508<br>5 | V-Set Immunoregulatory Receptor                     | VSIR     |      | GeneCard |          |
| 508<br>6 | V-Set and Transmembrane Domain Containing 4         | VSTM4    |      | GeneCard |          |
| 508<br>7 | Visual System Homeobox 1                            | VSX1     |      | GeneCard |          |
| 508<br>8 | Vitronectin                                         | VTN      |      | GeneCard | DisGenet |
| 508<br>9 | Coagulation factor VIII VWF (von Willebrand factor) | VWF      | OMIM | GeneCard | DisGenet |
| 509<br>0 | WAPL Cohesin Release Factor                         | WAPL     |      | GeneCard |          |
| 509<br>1 | WDFY Family Member 4                                | WDFY4    |      | GeneCard |          |
| 509<br>2 | WD Repeat and HMG-box DNA Binding Protein 1         | WDHD1    |      |          | DisGenet |
| 509<br>3 | WD Repeat Domain 1                                  | WDR1     |      | GeneCard | DisGenet |
| 509<br>4 | WD Repeat Domain 11                                 | WDR11    |      | GeneCard |          |
| 509<br>5 | WD Repeat Domain 20                                 | WDR20    |      |          | DisGenet |
| 509<br>6 | WD Repeat Domain 33                                 | WDR33    |      | GeneCard |          |
| 509<br>7 | WEE2 Antisense RNA 1                                | WEE2-AS1 |      | GeneCard |          |
| 509<br>8 | WAP Four-Disulfide Core Domain 21, Pseudogene       | WFDC21P  |      | GeneCard |          |
| 509<br>9 | WNK Lysine Deficient Protein Kinase 1               | WNK1     |      | GeneCard | DisGenet |
| 510<br>0 | Wnt Family Member 1                                 | WNT1     |      | GeneCard |          |
| 510<br>1 | Wnt Family Member 2                                 | WNT2     |      | GeneCard |          |
| 510<br>2 | Wnt Family Member 3A                                | WNT3A    |      |          | DisGenet |
| 510<br>3 | Wnt Family Member 4                                 | WNT4     |      | GeneCard |          |
| 510<br>4 | Wnt Family Member 5A                                | WNT5A    |      | GeneCard | DisGenet |

|          |                                                               |         |  |          |          |
|----------|---------------------------------------------------------------|---------|--|----------|----------|
| 510<br>5 | WRN RecQ Like Helicase                                        | WRN     |  | GeneCard | DisGenet |
| 510<br>6 | WRN Helicase Interacting Protein 1                            | WRNIP1  |  | GeneCard |          |
| 510<br>7 | WT1 Transcription Factor                                      | WT1     |  | GeneCard |          |
| 510<br>8 | WW And C2 Domain Containing 1                                 | WWC1    |  | GeneCard |          |
| 510<br>9 | WW Domain Containing Oxidoreductase                           | WWOX    |  | GeneCard |          |
| 511<br>0 | WW Domain Containing E3 Ubiquitin Protein Ligase 1            | WWP1    |  | GeneCard |          |
| 511<br>1 | WW Domain Containing E3 Ubiquitin Protein Ligase 2            | WWP2    |  | GeneCard |          |
| 511<br>2 | WW Domain Containing Transcription Regulator 1                | WWTR1   |  | GeneCard | DisGenet |
| 511<br>3 | XPA Binding Protein 2                                         | XAB2    |  | GeneCard |          |
| 511<br>4 | X-Box Binding Protein 1                                       | XBP1    |  | GeneCard | DisGenet |
| 511<br>5 | X-C Motif Chemokine Ligand 1                                  | XCL1    |  | GeneCard |          |
| 511<br>6 | X-C Motif Chemokine Ligand 2                                  | XCL2    |  | GeneCard |          |
| 511<br>7 | Xanthine Dehydrogenase                                        | XDH     |  | GeneCard | DisGenet |
| 511<br>8 | X-Linked Inhibitor of Apoptosis                               | XIAP    |  | GeneCard | DisGenet |
| 511<br>9 | X Inactive Specific Transcript                                | XIST    |  | GeneCard | DisGenet |
| 512<br>0 | X-Linked Kx Blood Group                                       | XK      |  | GeneCard |          |
| 512<br>1 | XK Related 4                                                  | XKR4    |  | GeneCard |          |
| 512<br>2 | XPA, DNA Damage Recognition and Repair Factor                 | XPA     |  | GeneCard |          |
| 512<br>3 | XPC Complex Subunit, DNA Damage Recognition and Repair Factor | XPC     |  | GeneCard |          |
| 512<br>4 | X-Prolyl Aminopeptidase 2                                     | XPNPEP2 |  | GeneCard |          |

|          |                                                                                |            |  |          |          |
|----------|--------------------------------------------------------------------------------|------------|--|----------|----------|
| 512<br>5 | Xenotropic and Polytropic Retrovirus Receptor 1                                | XPR1       |  |          | DisGenet |
| 512<br>6 | X-Ray Repair Cross Complementing 1                                             | XRCC1      |  | GeneCard |          |
| 512<br>7 | X-Ray Repair Cross Complementing 3                                             | XRCC3      |  | GeneCard |          |
| 512<br>8 | X-Ray Repair Cross Complementing 5                                             | XRCC5      |  | GeneCard |          |
| 512<br>9 | X-Ray Repair Cross Complementing 6                                             | XRCC6      |  | GeneCard |          |
| 513<br>0 | XXYLT1 Antisense RNA 2                                                         | XXYLT1-AS2 |  | GeneCard |          |
| 513<br>1 | Xylosyltransferase 1                                                           | XYLT1      |  | GeneCard |          |
| 513<br>2 | Xylosyltransferase 2                                                           | XYLT2      |  | GeneCard |          |
| 513<br>3 | Yes1 Associated Transcriptional Regulator                                      | YAP1       |  | GeneCard | DisGenet |
| 513<br>4 | Y-Box Binding Protein 1                                                        | YBX1       |  | GeneCard | DisGenet |
| 513<br>5 | Tyrosine 3-Monooxygenase/Tryptophan 5-Monooxygenase Activation Protein Epsilon | YWHAE      |  | GeneCard |          |
| 513<br>6 | Tyrosine 3-Monooxygenase/Tryptophan 5-Monooxygenase Activation Protein Zeta    | YWHAZ      |  | GeneCard | DisGenet |
| 513<br>7 | YY1 Transcription Factor                                                       | YY1        |  | GeneCard |          |
| 513<br>8 | Zeta Chain of T Cell Receptor Associated Protein Kinase 70                     | ZAP70      |  | GeneCard |          |
| 513<br>9 | Zinc Finger and BTB Domain Containing 16                                       | ZBTB16     |  | GeneCard |          |
| 514<br>0 | Zinc Finger and BTB Domain Containing 17                                       | ZBTB17     |  | GeneCard |          |
| 514<br>1 | Zinc Finger and BTB Domain Containing 20                                       | ZBTB20     |  | GeneCard |          |
| 514<br>2 | Zinc Finger and BTB Domain Containing 46                                       | ZBTB46     |  | GeneCard | DisGenet |
| 514<br>3 | Zinc Finger CCCH-Type Containing 12A                                           | ZC3H12A    |  | GeneCard |          |
| 514<br>4 | Zinc Finger CCCH-Type Containing 12C                                           | ZC3H12C    |  | GeneCard |          |

|          |                                          |            |  |          |          |
|----------|------------------------------------------|------------|--|----------|----------|
| 514<br>5 | Zinc Finger C3HC-Type Containing 1       | ZC3HC1     |  | GeneCard | DisGenet |
| 514<br>6 | Zinc Finger C4H2-Type Containing 2       | ZC4H2      |  |          | DisGenet |
| 514<br>7 | ZDHHC8 Pseudogene 1                      | ZDHHC8P1   |  | GeneCard |          |
| 514<br>8 | Zinc Finger E-box Binding Homeobox 1     | ZEB1       |  |          | DisGenet |
| 514<br>9 | ZEB1 Antisense RNA 1                     | ZEB1-AS1   |  | GeneCard | DisGenet |
| 515<br>0 | Zinc Finger E-Box Binding Homeobox 2     | ZEB2       |  | GeneCard |          |
| 515<br>1 | ZNFX1 Antisense RNA 1                    | ZFAS1      |  | GeneCard |          |
| 515<br>2 | Zinc Finger Homeobox 3                   | ZFHX3      |  | GeneCard |          |
| 515<br>3 | ZFP36 Ring Finger Protein                | ZFP36      |  | GeneCard | DisGenet |
| 515<br>4 | Zinc Finger Protein, FOG Family Member 2 | ZFPM2      |  | GeneCard |          |
| 515<br>5 | Zinc Finger FYVE-Type Containing 9       | ZFYVE9     |  | GeneCard |          |
| 515<br>6 | Zinc Finger GATA Like Protein 1          | ZGLP1      |  |          | DisGenet |
| 515<br>7 | Zinc Finger GRF-Type Containing 1        | ZGRF1      |  | GeneCard |          |
| 515<br>8 | Zinc Fingers And Homeoboxes 2            | ZHX2       |  | GeneCard | DisGenet |
| 515<br>9 | Zinc Metallopeptidase STE24              | ZMPSTE24   |  | GeneCard | DisGenet |
| 516<br>0 | Zinc Finger Protein 148                  | ZNF148     |  |          | DisGenet |
| 516<br>1 | Zinc Finger Protein 202                  | ZNF202     |  | GeneCard | DisGenet |
| 516<br>2 | Zinc Finger Protein 213                  | ZNF213     |  | GeneCard |          |
| 516<br>3 | ZNF213 Antisense RNA 1 (Head To Head)    | ZNF213-AS1 |  | GeneCard |          |
| 516<br>4 | Zinc Finger Protein 23                   | ZNF23      |  | GeneCard |          |

|          |                                           |            |  |          |          |
|----------|-------------------------------------------|------------|--|----------|----------|
| 516<br>5 | Zinc Finger Protein 248                   | ZNF248     |  | GeneCard |          |
| 516<br>6 | Zinc Finger Protein 263                   | ZNF263     |  |          | DisGenet |
| 516<br>7 | ZNF295 Antisense RNA 1                    | ZNF295-AS1 |  | GeneCard |          |
| 516<br>8 | Zinc Finger Protein 318                   | ZNF318     |  |          | DisGenet |
| 516<br>9 | Zinc Finger Protein 326                   | ZNF326     |  | GeneCard |          |
| 517<br>0 | Zinc Finger Protein 366                   | ZNF366     |  | GeneCard |          |
| 517<br>1 | Zinc Finger Protein 383                   | ZNF383     |  | GeneCard |          |
| 517<br>2 | Zinc Finger Protein 385D                  | ZNF385D    |  | GeneCard |          |
| 517<br>3 | Zinc Finger Protein 394                   | ZNF394     |  | GeneCard |          |
| 517<br>4 | Zinc Finger Protein 441                   | ZNF441     |  | GeneCard |          |
| 517<br>5 | Zinc Finger Protein 462                   | ZNF462     |  | GeneCard |          |
| 517<br>6 | Zinc Finger Protein 491                   | ZNF491     |  | GeneCard |          |
| 517<br>7 | Zinc Finger Protein 580                   | ZNF580     |  | GeneCard |          |
| 517<br>8 | Zinc Finger Protein 592                   | ZNF592     |  | GeneCard |          |
| 517<br>9 | Zinc Finger Protein 627                   | ZNF627     |  | GeneCard |          |
| 518<br>0 | Zinc Finger Protein 687                   | ZNF687     |  | GeneCard |          |
| 518<br>1 | Zinc Finger Protein 717                   | ZNF717     |  | GeneCard |          |
| 518<br>2 | Zinc Finger Family Member 788, Pseudogene | ZNF788P    |  | GeneCard |          |
| 518<br>3 | Zinc Finger Protein 823                   | ZNF823     |  | GeneCard |          |
| 518<br>4 | Zinc Finger Protein 844                   | ZNF844     |  | GeneCard |          |

|          |                                      |         |  |          |          |
|----------|--------------------------------------|---------|--|----------|----------|
| 518<br>5 | Zinc Finger Protein 887, Pseudogene  | ZNF887P |  | GeneCard |          |
| 518<br>6 | Zinc Finger HIT-Type Containing 3    | ZNHIT3  |  | GeneCard |          |
| 518<br>7 | Zinc Ribbon Domain Containing 2      | ZNRD2   |  |          | DisGenet |
| 518<br>8 | Zona Pellucida Glycoprotein 2        | ZP2     |  | GeneCard |          |
| 518<br>9 | Zona Pellucida Glycoprotein 3        | ZP3     |  | GeneCard |          |
| 519<br>0 | ZPR1 Zinc Finger                     | ZPR1    |  | GeneCard |          |
| 519<br>1 | Zinc Finger RANBP2-Type Containing 3 | ZRANB3  |  | GeneCard |          |
| 519<br>2 | Zyxin                                | ZYX     |  | GeneCard |          |

**Supplementary Table S4: The degree value of nodes in protein–protein interaction network.**

| No  | Target  | Degree |
|-----|---------|--------|
| 1.  | SRC     | 41     |
| 2.  | PIK3R1  | 29     |
| 3.  | PIK3CA  | 29     |
| 4.  | AKT1    | 29     |
| 5.  | RXRA    | 23     |
| 6.  | PTPN11  | 21     |
| 7.  | EGFR    | 20     |
| 8.  | ESR1    | 20     |
| 9.  | NFKB1   | 17     |
| 10. | APP     | 14     |
| 11. | MAPK8   | 14     |
| 12. | STAT1   | 13     |
| 13. | CYP3A4  | 13     |
| 14. | RXRB    | 13     |
| 15. | AR      | 13     |
| 16. | CDK1    | 13     |
| 17. | PTK2    | 12     |
| 18. | SYK     | 12     |
| 19. | PRKCA   | 12     |
| 20. | PDGFRB  | 12     |
| 21. | IGF1R   | 11     |
| 22. | PTPN1   | 11     |
| 23. | PIK3CB  | 11     |
| 24. | CDK5    | 10     |
| 25. | KDR     | 10     |
| 26. | PTPN6   | 10     |
| 27. | GSK3B   | 10     |
| 28. | CDK6    | 10     |
| 29. | NR3C1   | 10     |
| 30. | RAF1    | 9      |
| 31. | CCNA2   | 9      |
| 32. | PTPN2   | 9      |
| 33. | F2      | 9      |
| 34. | CCNB1   | 9      |
| 35. | CYP2C19 | 9      |
| 36. | PRKCD   | 9      |
| 37. | CDK2    | 9      |
| 38. | INSR    | 8      |
| 39. | PPARG   | 8      |
| 40. | MET     | 8      |
| 41. | PPARA   | 8      |
| 42. | CCNB2   | 7      |

|     |         |   |
|-----|---------|---|
| 43. | PLG     | 7 |
| 44. | PSEN1   | 7 |
| 45. | TERT    | 7 |
| 46. | CCNE1   | 7 |
| 47. | HIF1A   | 7 |
| 48. | PIK3CG  | 7 |
| 49. | FLT1    | 7 |
| 50. | ALOX5   | 7 |
| 51. | NOS2    | 7 |
| 52. | ALOX15  | 6 |
| 53. | PTGS2   | 6 |
| 54. | ROCK2   | 6 |
| 55. | NCSTN   | 6 |
| 56. | ROCK1   | 6 |
| 57. | PIN1    | 6 |
| 58. | MAPT    | 6 |
| 59. | NR1H3   | 6 |
| 60. | CAMK2B  | 6 |
| 61. | KIT     | 6 |
| 62. | BCL2    | 6 |
| 63. | AURKA   | 6 |
| 64. | TLR4    | 6 |
| 65. | PTGS1   | 6 |
| 66. | HDAC3   | 5 |
| 67. | SLC9A1  | 5 |
| 68. | ALOX12  | 5 |
| 69. | PDGFRA  | 5 |
| 70. | HMGCR   | 5 |
| 71. | PIK3CD  | 5 |
| 72. | PARP1   | 5 |
| 73. | NR1H2   | 5 |
| 74. | CBR1    | 5 |
| 75. | CAPN1   | 5 |
| 76. | CCNT1   | 5 |
| 77. | AHR     | 5 |
| 78. | APEX1   | 4 |
| 79. | KDM1A   | 4 |
| 80. | EDNRA   | 4 |
| 81. | NR4A1   | 4 |
| 82. | APH1B   | 4 |
| 83. | TRIM24  | 4 |
| 84. | NTRK1   | 4 |
| 85. | MMP9    | 4 |
| 86. | NOS1    | 4 |
| 87. | HSD11B1 | 4 |



|      |          |   |
|------|----------|---|
| 88.  | CETP     | 4 |
| 89.  | MAOB     | 4 |
| 90.  | BACE1    | 4 |
| 91.  | AKR1B10  | 4 |
| 92.  | SCD      | 4 |
| 93.  | AKR1B1   | 4 |
| 94.  | ADAM10   | 4 |
| 95.  | AKR1A1   | 3 |
| 96.  | DPP4     | 3 |
| 97.  | ESR2     | 3 |
| 98.  | DNMT1    | 3 |
| 99.  | PLA2G4A  | 3 |
| 100. | CES1     | 3 |
| 101. | GUSB     | 3 |
| 102. | PGR      | 3 |
| 103. | PTGES    | 3 |
| 104. | KEAP1    | 3 |
| 105. | ARG1     | 3 |
| 106. | EPHX1    | 3 |
| 107. | MGLL     | 3 |
| 108. | MAPK9    | 3 |
| 109. | PSEN2    | 3 |
| 110. | PSMB9    | 3 |
| 111. | DHFR     | 3 |
| 112. | CYP19A1  | 3 |
| 113. | PPARD    | 3 |
| 114. | FPR1     | 3 |
| 115. | MMP3     | 3 |
| 116. | MAOA     | 3 |
| 117. | LIMK1    | 2 |
| 118. | CFTR     | 2 |
| 119. | POLB     | 2 |
| 120. | NFE2L2   | 2 |
| 121. | ESRRA    | 2 |
| 122. | CA9      | 2 |
| 123. | PKN1     | 2 |
| 124. | CPT2     | 2 |
| 125. | CES2     | 2 |
| 126. | EPAS1    | 2 |
| 127. | MPO      | 2 |
| 128. | SERPINE1 | 2 |
| 129. | FABP4    | 2 |
| 130. | CYP17A1  | 2 |
| 131. | NOX4     | 2 |
| 132. | MYLK     | 2 |

|      |          |   |
|------|----------|---|
| 133. | ABCB1    | 2 |
| 134. | S1PR3    | 2 |
| 135. | AOC3     | 2 |
| 136. | PTGER1   | 2 |
| 137. | ODC1     | 2 |
| 138. | MMP2     | 2 |
| 139. | NR1I2    | 2 |
| 140. | PDE3B    | 2 |
| 141. | SQLE     | 2 |
| 142. | CYP1B1   | 2 |
| 143. | CYP51A1  | 2 |
| 144. | C5AR1    | 1 |
| 145. | NLRP3    | 1 |
| 146. | KCNH2    | 1 |
| 147. | MMP13    | 1 |
| 148. | ALK      | 1 |
| 149. | ACHE     | 1 |
| 150. | FABP5    | 1 |
| 151. | F2R      | 1 |
| 152. | PRMT1    | 1 |
| 153. | PIM1     | 1 |
| 154. | AXL      | 1 |
| 155. | MMP8     | 1 |
| 156. | MAPKAPK2 | 1 |
| 157. | MMP12    | 1 |
| 158. | SHBG     | 1 |
| 159. | AKR1C4   | 1 |
| 160. | PRKCH    | 1 |
| 161. | MAP4K4   | 1 |
| 162. | AHCY     | 1 |
| 163. | TTR      | 1 |
| 164. | F10      | 1 |
| 165. | S1PR2    | 1 |
| 166. | CD81     | 1 |
| 167. | GGPS1    | 1 |
| 168. | TOP1     | 1 |
| 169. | SLC5A2   | 1 |
| 170. | RPS6KA5  | 1 |
| 171. | CA2      | 1 |
| 172. | KLF5     | 1 |
| 173. | PTPRC    | 1 |
| 174. | TNKS     | 1 |
| 175. | CTSD     | 1 |
| 176. | FPR2     | 1 |
